# Supplementary material
Source: publisher figshare collection journal article supplement (https://gsapubs.figshare.com/ndownloader/files/23313662)
Supplement: Supplementary file 1 [file 23313662]

## Sheet: RKB Core
GSA Data Repository Item 2018394 accompanies Soreghan, M.J., Swift, M.M., and Soreghan, G.S., 2018, Provenance of Permian eolian and related strata in the North American midcontinent: Tectonic and climatic
controls on sediment dispersal in western tropical Pangea, in Ingersoll, R.V., Lawton, T.F., and Graham, S.A., eds., Tectonics, Sedimentary Basins, and Provenance:
A Celebration of William R. Dickinson’s Career: Geological Society of America Special Paper 540, p. 661–687, https://doi.org/10.1130/2018.2540(28).
Table DR1. Unpublished Detrital Zircon Geochronology for Samples from the Permian of Oklahoma and Kansas
Analysis	U	206Pb	U/Th	206Pb*	±	207Pb*	±	206Pb*	±	error	206Pb*	±	207Pb*	±	206Pb*	±	Best age	±	Conc
	(ppm)	204Pb		207Pb*	(%)	235U*	(%)	238U	(%)	corr.	238U*	(Ma)	235U	(Ma)	207Pb*	(Ma)	(Ma)	(Ma)	(%)
17a--Council Grove Group Rebecca K. Bounds Core, Depth 3251 ft. ( 38.48963, -101.97456)
12RKB3251-1	50.2147	32022.2	0.892759	5.66683	1.07371	11.7181	1.54774	0.481612	1.11474	0.720237	2534.28	23.3591	2582.15	14.4808	2619.92	17.8661	2619.92	17.8661	96.7314
12RKB3251-2	618.076	50862.3	6.04314	17.0587	0.78221	0.728986	3.6312	0.090191	3.54595	0.976523	556.667	18.9109	555.958	15.5468	553.048	17.0909	556.667	18.9109	100.654
12RKB3251-4	105.096	84253.7	1.16575	13.0297	2.69323	1.87774	4.51517	0.177447	3.62399	0.802624	1053.01	35.2076	1073.27	29.9236	1114.62	53.7513	1114.62	53.7513	94.4727
12RKB3251-5	525.826	22233.1	1.93446	10.7242	0.744175	2.92253	7.23204	0.227313	7.19365	0.994692	1320.4	85.8937	1387.76	54.7651	1492.89	14.0842	1492.89	14.0842	88.4459
12RKB3251-5B	161.394	44830	1.54058	16.8075	3.5683	0.650992	4.20202	0.0793554	2.21906	0.528094	492.274	10.5172	509.089	16.8251	585.367	77.464	492.274	10.5172	84.0967
12RKB3251-6	143.173	37964.3	1.04872	17.2526	3.51494	0.790617	3.69619	0.0989279	1.14324	0.309302	608.123	6.63445	591.522	16.5724	528.361	77.05	608.123	6.63445	115.096
12RKB3251-7	262.921	53246	0.815914	16.5594	2.13556	0.803258	3.33632	0.0964715	2.56328	0.768297	593.697	14.5384	598.665	15.0913	617.506	46.1208	593.697	14.5384	96.1444
12RKB3251-8	119.212	15491.8	0.675447	18.6473	12.2942	0.457394	12.435	0.0618593	1.8655	0.150021	386.923	7.00571	382.444	39.6468	355.446	278.56	386.923	7.00571	NA
12RKB3251-9	83.0989	33077.1	3.56677	16.2101	3.26923	1.01322	3.37691	0.119121	0.845962	0.250514	725.5	5.80469	710.5	17.2585	663.363	70.0658	725.5	5.80469	109.367
12RKB3251-11	112.949	63142.2	2.89074	12.0457	1.37038	2.52606	1.75768	0.220685	1.10069	0.626218	1285.49	12.8278	1279.57	12.7864	1269.63	26.7474	1269.63	26.7474	101.249
12RKB3251-12	266.467	18891	1.19189	16.4015	3.20762	0.868292	5.52936	0.103288	4.50389	0.814541	633.647	27.1812	634.64	26.0989	638.197	69.0127	633.647	27.1812	99.2871
12RKB3251-13	346.95	191806	1.24515	14.3121	0.730308	1.42787	1.22321	0.148214	0.981266	0.802208	890.946	8.16531	900.66	7.30466	924.585	15.0048	924.585	15.0048	96.3618
12RKB3251-14	212.202	38627.7	0.744267	17.0646	2.85343	0.691264	3.29575	0.0855539	1.64921	0.500406	529.188	8.37883	533.56	13.6786	552.316	62.2784	529.188	8.37883	95.8126
12RKB3251-15	110.561	23691.1	3.57109	16.3235	4.0176	0.934734	4.32322	0.110662	1.59661	0.369309	676.592	10.2549	670.122	21.2113	648.448	86.3367	676.592	10.2549	104.34
12RKB3251-16	325.899	207200	2.80653	13.1388	0.894254	1.94777	1.13443	0.185606	0.698024	0.615309	1097.53	7.04435	1097.68	7.61131	1097.96	17.9145	1097.96	17.9145	99.961
12RKB3251-17B	98.0497	16272.6	0.875883	19.0064	10.6222	0.500911	10.8356	0.0690493	2.14022	0.197517	430.425	8.91126	412.319	36.7349	312.158	242.324	430.425	8.91126	137.887
12RKB3251-18	185.409	40273.5	0.949734	17.7803	3.75248	0.526673	3.97942	0.0679172	1.32463	0.33287	423.595	5.43068	429.599	13.9403	461.907	83.203	423.595	5.43068	91.7057
12RKB3251-19	229.485	168314	2.25884	9.8594	0.425452	4.06685	0.891114	0.290809	0.782991	0.878665	1645.57	11.3716	1647.68	7.26257	1650.36	7.88781	1650.36	7.88781	99.7097
12RKB3251-20	305.559	62606.7	0.895095	17.8002	3.50053	0.564582	5.0937	0.0728872	3.70028	0.726443	453.527	16.2051	454.504	18.6656	459.445	77.6609	453.527	16.2051	98.7118
12RKB3251-21	391.102	111047	1.2943	16.62	1.92006	0.791599	2.09692	0.0954191	0.84288	0.40196	587.507	4.73303	592.079	9.40782	609.616	41.4867	587.507	4.73303	96.3734
12RKB3251-22	409.061	97783.9	2.8495	9.54308	0.280254	4.12332	1.45181	0.285387	1.42451	0.981191	1618.44	20.3885	1658.94	11.8647	1710.58	5.1563	1710.58	5.1563	94.6133
12RKB3251-23B	300.382	21278.7	1.50777	18.6243	6.22905	0.369761	6.74086	0.049946	2.57643	0.382212	314.19	7.9008	319.476	18.4786	358.18	140.736	314.19	7.9008	NA
12RKB3251-24	131.791	40023.5	2.65187	17.1703	5.96763	0.731065	6.04732	0.0910398	0.978507	0.161808	561.684	5.26348	557.178	25.9376	538.818	130.671	561.684	5.26348	104.244
12RKB3251-25	473.421	77541	136.973	18.4189	2.13003	0.405463	2.48263	0.0541644	1.2753	0.513691	340.038	4.22413	345.603	7.27245	383.161	47.8528	340.038	4.22413	NA
12RKB3251-26	146.41	61666.7	1.22991	8.37712	0.825609	4.34601	2.55017	0.264049	2.41282	0.946144	1510.52	32.4914	1702.14	21.0534	1946.84	14.7593	1946.84	14.7593	77.5885
12RKB3251-27	83.503	74704.4	1.56554	5.30151	0.308025	13.5494	1.16217	0.520976	1.1206	0.964236	2703.32	24.7439	2718.74	10.9898	2730.2	5.07212	2730.2	5.07212	99.0153
12RKB3251-30	151.431	19419.3	0.815243	17.5148	4.02857	0.581595	6.88189	0.0738798	5.57952	0.810754	459.488	24.745	465.486	25.7013	495.203	88.8399	459.488	24.745	92.7878
12RKB3251-31	53.3488	32101.1	1.11814	10.6608	2.84225	3.34074	3.44815	0.258303	1.95227	0.566178	1481.15	25.8347	1490.63	26.9524	1504.11	53.7204	1504.11	53.7204	98.4738
12RKB3251-32	69.6512	18200.7	1.77535	11.0268	1.83804	3.07693	2.54343	0.246074	1.75802	0.691201	1418.2	22.3803	1426.96	19.4934	1440.04	35.0369	1440.04	35.0369	98.4831
12RKB3251-33	249.018	111404	1.66795	11.3658	0.503072	2.92172	1.25465	0.240845	1.14938	0.916093	1391.09	14.3814	1387.55	9.49135	1382.1	9.66469	1382.1	9.66469	100.65
12RKB3251-34	385.257	161048	5.29778	15.2093	0.698548	1.16842	1.00019	0.128887	0.715826	0.715691	781.513	5.26847	785.907	5.47233	798.379	14.66	781.513	5.26847	97.8875
12RKB3251-36	119.254	84131.4	2.75131	8.63865	0.641902	4.74992	2.99033	0.297598	2.92062	0.976689	1679.39	43.1808	1776.09	25.0878	1891.71	11.5485	1891.71	11.5485	88.7763
12RKB3251-37	346.69	235351	1.90599	8.8438	0.192979	5.18087	0.577571	0.332308	0.544378	0.94253	1849.56	8.75296	1849.48	4.91577	1849.38	3.49017	1849.38	3.49017	100.01
12RKB3251-38	196.758	49369.7	1.56374	16.9147	2.92193	0.828338	3.00964	0.101618	0.721295	0.239661	623.883	4.28914	612.689	13.8459	571.507	63.598	623.883	4.28914	109.165
12RKB3251-39	77.9379	41125.5	2.36427	12.0431	1.91068	2.47849	2.33603	0.216483	1.34401	0.575337	1263.26	15.4183	1265.78	16.9023	1270.04	37.275	1270.04	37.275	99.4663
12RKB3251-40	140.324	169142	0.910398	9.83492	0.724005	4.04027	2.47753	0.288191	2.36939	0.956349	1632.48	34.171	1642.34	20.168	1654.97	13.4135	1654.97	13.4135	98.6413
12RKB3251-41	451.459	313682	2.30434	5.31128	0.205397	13.1529	0.840898	0.506662	0.815427	0.96971	2642.36	17.6769	2690.68	7.9352	2727.17	3.38314	2727.17	3.38314	96.8903
12RKB3251-42	346.445	146741	1.96096	13.8058	1.34956	1.62589	1.79919	0.162799	1.18987	0.661332	972.31	10.739	980.27	11.312	998.125	27.4106	998.125	27.4106	97.4137
12RKB3251-43	299.236	400774	2.96417	5.64063	0.886104	10.9944	1.93455	0.449779	1.71968	0.888931	2394.27	34.3929	2522.66	18.0073	2627.62	14.73	2627.62	14.73	91.1192
12RKB3251-44C	362.486	91219.4	1.26188	17.0084	2.2512	0.746373	2.79601	0.09207	1.65824	0.593074	567.768	9.01226	566.118	12.1341	559.513	49.0687	567.768	9.01226	101.475
12RKB3251-45	86.5647	10901.4	3.07885	17.2142	8.2385	0.645673	9.00838	0.0806116	3.64391	0.404502	499.772	17.5232	505.812	35.9027	533.216	180.669	499.772	17.5232	93.7279
12RKB3251-46	113.263	28175.2	1.93703	15.857	5.34067	0.84635	5.57261	0.0973353	1.59099	0.285502	598.774	9.09739	622.644	25.9429	710.397	113.608	598.774	9.09739	84.2872
12RKB3251-47	160.188	61031.8	3.86925	9.13918	1.05942	4.51129	4.99932	0.299025	4.88578	0.977289	1686.47	72.5037	1733.05	41.5749	1789.74	19.2993	1789.74	19.2993	94.2297
12RKB3251-48	70.0746	93614.7	4.41913	8.02007	0.761266	6.15319	1.24984	0.357913	0.991254	0.793102	1972.27	16.8426	1997.83	10.917	2024.35	13.4846	2024.35	13.4846	97.4276
12RKB3251-49	94.6172	222538	1.40398	5.31102	0.539275	13.1586	1.83942	0.506857	1.75859	0.956058	2643.2	38.1331	2691.09	17.3597	2727.25	8.87912	2727.25	8.87912	96.918
12RKB3251-50	111.841	110405	1.93472	13.3	1.64521	1.79814	2.10623	0.17345	1.3151	0.624388	1031.09	12.5311	1044.78	13.7441	1073.55	33.0631	1073.55	33.0631	96.0456
12RKB3251-51	226.271	33412.3	0.538176	17.9348	3.4332	0.521245	3.79788	0.0678011	1.62389	0.427579	422.895	6.64695	425.983	13.2141	442.703	76.3736	422.895	6.64695	95.5255
12RKB3251-52	239.896	19259.2	0.319326	16.165	2.69816	0.924726	2.91431	0.108415	1.10144	0.377942	663.534	6.94489	664.856	14.218	669.343	57.7577	663.534	6.94489	99.1322
12RKB3251-53	389.976	19787.6	0.567624	17.3099	3.08495	0.57772	4.06083	0.0725287	2.64072	0.650291	451.373	11.5118	462.995	15.0996	521.047	67.683	451.373	11.5118	86.628
12RKB3251-54	233.431	47181.7	3.0403	20.1482	4.23039	0.327126	4.51195	0.0478024	1.56891	0.347723	301.016	4.6141	287.37	11.2932	177.787	98.7004	301.016	4.6141	NA
12RKB3251-55	36.1323	30849.3	2.78641	7.69821	1.77819	6.71576	2.53442	0.374959	1.80591	0.712554	2052.69	31.7477	2074.7	22.4024	2096.6	31.2427	2096.6	31.2427	97.9056
12RKB3251-56	149.931	63290.5	0.816517	9.87278	0.748828	4.09726	1.3783	0.293381	1.15714	0.839539	1658.4	16.9203	1653.76	11.2499	1647.85	13.8878	1647.85	13.8878	100.641
12RKB3251-57	76.3126	74960.4	2.18624	13.4142	3.16097	1.79829	3.61253	0.174954	1.7489	0.484121	1039.35	16.7876	1044.84	23.5769	1056.36	63.6738	1056.36	63.6738	98.39
12RKB3251-59	128.484	23931.5	5.30228	16.786	5.54285	0.759781	5.68239	0.0924983	1.25155	0.220251	570.296	6.83094	573.884	24.916	588.101	120.35	570.296	6.83094	96.9724
12RKB3251-60	73.1841	11062.8	0.808712	17.8903	12.7081	0.634149	12.9502	0.0822826	2.49228	0.192451	509.733	12.2147	498.677	51.0708	448.226	283.374	509.733	12.2147	113.722
12RKB3251-61	331.228	201903	1.48325	7.74006	0.36933	5.96015	1.49549	0.33458	1.44916	0.969025	1860.54	23.4203	1970.05	13.0039	2087.07	6.4965	2087.07	6.4965	89.1461
12RKB3251-62	306.101	111467	3.23375	10.6702	0.528351	3.41726	1.06612	0.264453	0.925992	0.868561	1512.58	12.4845	1508.37	8.37474	1502.45	9.98673	1502.45	9.98673	100.675
12RKB3251-64	69.9005	39205.5	2.1888	8.9509	1.23164	5.22043	8.87207	0.3389	8.78616	0.990317	1881.38	143.388	1855.96	75.7435	1827.58	22.3333	1827.58	22.3333	102.944
12RKB3251-65	343.02	52053	2.24426	13.4766	0.721477	1.80929	1.84167	0.176842	1.69446	0.920071	1049.7	16.4142	1048.82	12.0441	1047.01	14.5672	1047.01	14.5672	100.257
12RKB3251-66	237.797	57828.2	2.38499	16.8674	2.37536	0.743713	2.49731	0.0909812	0.770842	0.308669	561.338	4.14398	564.57	10.8155	577.619	51.6081	561.338	4.14398	97.1814
12RKB3251-67	70.2375	69157.6	2.1957	9.40495	0.98259	4.72029	1.39151	0.321976	0.985305	0.708082	1799.37	15.47	1770.85	11.6597	1737.36	18.0162	1737.36	18.0162	103.57
12RKB3251-68	105.013	92108.5	1.38409	10.0045	1.35745	4.12484	1.85535	0.299296	1.26477	0.681691	1687.82	18.7813	1659.24	15.164	1623.23	25.2543	1623.23	25.2543	103.979
12RKB3251-72	51.7515	13822.3	1.45326	13.2365	6.60991	1.8631	6.91669	0.178857	2.03709	0.294517	1060.73	19.9239	1068.09	45.7321	1083.13	132.711	1083.13	132.711	97.9322
12RKB3251-73	316.74	68130.4	1.23614	16.8481	1.03157	0.754499	1.49649	0.0921955	1.08414	0.724453	568.508	5.89946	570.832	6.53456	580.116	22.3888	568.508	5.89946	97.9991
12RKB3251-74	218.993	110771	5.89203	9.85103	0.517645	4.03314	0.699703	0.288153	0.470774	0.67282	1632.29	6.7887	1640.9	5.69315	1651.94	9.59513	1651.94	9.59513	98.811
12RKB3251-75	162.977	22090.8	0.669013	10.1627	1.27648	3.56192	3.78247	0.262538	3.56058	0.941336	1502.82	47.7304	1541.09	29.9964	1593.98	23.8378	1593.98	23.8378	94.2805
12RKB3251-76	84.6593	10764.9	2.3548	12.2227	7.28522	2.08339	7.76749	0.184686	2.69433	0.346873	1092.52	27.0771	1143.35	53.3398	1241.08	142.936	1241.08	142.936	88.0299
12RKB3251-77	358.502	2649.73	1.13773	16.0607	4.46709	0.839011	4.97181	0.0977305	2.18265	0.439006	601.095	12.5267	618.6	23.0357	683.167	95.428	601.095	12.5267	87.9865
12RKB3251-78	169.59	36231.6	1.17096	9.48621	1.18629	3.71406	1.40933	0.255529	0.760874	0.539882	1466.93	9.98262	1574.4	11.275	1721.57	21.7932	1721.57	21.7932	85.2087
12RKB3251-80	141.192	26343.5	1.80977	13.3748	1.85183	1.81497	2.08633	0.176057	0.960986	0.460611	1045.4	9.27388	1050.87	13.6595	1062.28	37.2748	1062.28	37.2748	98.4109
12RKB3251-81	343.716	93366.9	1.38964	16.2893	1.42377	0.886921	2.02204	0.104782	1.43581	0.710078	642.37	8.77855	644.714	9.65082	652.946	30.5766	642.37	8.77855	98.3803
12RKB3251-82	175.392	87712.4	1.68161	9.45741	1.25279	3.96332	8.61289	0.271851	8.52129	0.989365	1550.19	117.426	1626.72	69.9442	1727.15	23.0008	1727.15	23.0008	89.754
12RKB3251-83	407.324	256922	1.1778	6.64849	0.390802	8.6142	2.14757	0.415372	2.11171	0.983303	2239.43	39.9507	2298.06	19.5403	2350.58	6.68035	2350.58	6.68035	95.2717
12RKB3251-84	165.929	68045.2	0.662056	16.4664	3.69612	0.742616	5.10703	0.0886875	3.52426	0.690081	547.77	18.5075	563.931	22.1019	629.649	79.6608	547.77	18.5075	86.9961
12RKB3251-85	211.227	114574	1.58902	7.23376	0.505576	6.46177	5.0322	0.339011	5.00674	0.99494	1881.91	81.7196	2040.71	44.2764	2205.27	8.77716	2205.27	8.77716	85.3371
12RKB3251-86	107.386	63522.3	0.959078	13.636	1.56082	1.66542	1.9695	0.164706	1.20116	0.60988	982.879	10.95	995.444	12.4959	1023.21	31.5937	1023.21	31.5937	96.058
12RKB3251-87	143.46	145159	3.03271	13.5847	2.35626	1.76582	2.59656	0.173978	1.09094	0.420147	1033.99	10.4221	1032.99	16.8341	1030.84	47.63	1030.84	47.63	100.306
12RKB3251-88	66.315	183012	1.43395	5.24224	0.636828	14.0161	1.24473	0.532897	1.06948	0.859211	2753.65	23.9676	2750.8	11.7976	2748.69	10.469	2748.69	10.469	100.18
12RKB3251-89	175.298	78122.6	1.27731	13.8614	1.59442	1.63767	2.07085	0.16464	1.32146	0.638124	982.508	12.0424	984.816	13.0559	989.946	32.4315	989.946	32.4315	99.2487
12RKB3251-90	134.546	69412.3	1.4116	13.8428	1.43769	1.62907	1.94717	0.163555	1.31321	0.674418	976.504	11.8995	981.502	12.2516	992.679	29.2121	992.679	29.2121	98.3706
12RKB3251-91	335.831	289166	1.13991	8.90782	0.340918	5.07797	0.773519	0.328065	0.694339	0.897636	1829	11.0568	1832.43	6.56204	1836.32	6.17557	1836.32	6.17557	99.6012
12RKB3251-92	407.342	112359	1.36417	13.1812	0.479798	1.89364	0.656804	0.18103	0.448536	0.682908	1072.6	4.43205	1078.86	4.36436	1091.51	9.59937	1091.51	9.59937	98.2673
12RKB3251-93	609.591	128022	1.2367	17.7196	1.43674	0.583195	1.62745	0.0749491	0.764447	0.469721	465.903	3.43593	466.512	6.08726	469.489	31.8186	465.903	3.43593	99.2363
12RKB3251-94	198.586	88049.9	1.8571	10.7143	0.7214	3.31768	2.16241	0.257809	2.03852	0.942711	1478.62	26.9352	1485.22	16.873	1494.64	13.65	1494.64	13.65	98.9281
12RKB3251-95	434.694	55213.9	3.05547	16.9371	1.86684	0.698748	2.01082	0.0858341	0.747201	0.371591	530.852	3.8076	538.043	8.39855	568.66	40.6147	530.852	3.8076	93.3515
12RKB3251-96	174.137	52452.3	1.57371	5.77635	3.90715	11.2432	5.57815	0.471022	3.9812	0.713713	2488.04	82.1821	2543.5	52.0589	2588.02	65.2296	2588.02	65.2296	96.1367
12RKB3251-97	173.773	117800	2.20802	9.8559	0.660039	3.87684	1.55459	0.277123	1.40751	0.905393	1576.86	19.6885	1608.87	12.5489	1651.02	12.2344	1651.02	12.2344	95.5082
12RKB3251-98	233.886	32053.7	1.38937	7.36876	1.0629	6.32036	4.39537	0.337781	4.26491	0.97032	1875.99	69.4217	2021.28	38.5517	2173.12	18.5159	2173.12	18.5159	86.327
12RKB3251-99	443.975	71703.7	7.34444	17.2879	1.5972	0.641438	2.41029	0.080426	1.80512	0.748923	498.665	8.66216	503.196	9.56406	523.828	35.0475	498.665	8.66216	95.1963
12RKB3251-100	91.9784	26454.1	2.54489	16.4528	4.11086	0.841208	4.39292	0.100379	1.54875	0.352557	616.63	9.10756	619.812	20.3818	631.469	88.5647	616.63	9.10756	97.6502
17b--Council Grove Group Rebecca K. Bounds Core, Depth 3104 ft. ( 38.48963, -101.97456)
12RKB3104-1	316.713	160888	3.29759	13.5925	1.05289	1.76483	1.45643	0.17398	1.00628	0.690923	1034	9.6134	1032.62	9.43987	1029.68	21.306	1029.68	21.306	100.42
12RKB3104-2	667.536	63126.9	7.41069	14.3421	1.53829	1.1667	3.08521	0.121359	2.67435	0.866831	738.379	18.658	785.099	16.87	920.28	31.638	920.28	31.638	80.2342
12RKB3104-3B	189.811	270204	2.67367	10.8267	0.451204	3.23445	1.74103	0.253977	1.68155	0.965835	1458.95	21.955	1465.45	13.5041	1474.87	8.56001	1474.87	8.56001	98.9205
12RKB3104-4	225.84	78838.5	1.11841	9.85896	0.552502	3.9234	1.84412	0.280538	1.75941	0.954064	1594.07	24.8477	1618.52	14.9227	1650.44	10.2432	1650.44	10.2432	96.5845
12RKB3104-5	128.463	8324.33	2.33815	12.1327	0.997981	2.17703	1.36556	0.191567	0.932085	0.682567	1129.86	9.65998	1173.73	9.50159	1255.58	19.4995	1255.58	19.4995	89.9868
12RKB3104-6	319.308	73570.9	2.89302	7.50782	0.303346	7.11989	0.904086	0.387691	0.851676	0.94203	2112.11	15.3386	2126.53	8.04955	2140.49	5.30392	2140.49	5.30392	98.6742
12RKB3104-8	205.608	47998.1	1.6455	7.54382	0.343922	6.83967	0.968295	0.374218	0.905159	0.934797	2049.22	15.8896	2090.87	8.57798	2132.12	6.01903	2132.12	6.01903	96.1117
12RKB3104-9	92.6121	64075.3	2.16741	12.6938	2.42448	2.06488	2.84109	0.190101	1.48112	0.521321	1121.92	15.2514	1137.24	19.4379	1166.56	48.016	1166.56	48.016	96.1736
12RKB3104-10	182.762	118128	1.95811	10.7939	0.455432	3.27837	1.08808	0.256646	0.988183	0.908187	1472.66	13.01	1475.93	8.46606	1480.63	8.63355	1480.63	8.63355	99.4616
12RKB3104-11	278.141	7108.17	1.75456	9.40827	3.03267	3.79989	5.54398	0.259286	4.64097	0.837119	1486.19	61.6021	1592.72	44.5934	1736.71	55.6218	1736.71	55.6218	85.575
12RKB3104-12	158.273	27188.1	2.14152	15.9763	2.34389	0.922407	2.53308	0.10688	0.960556	0.379205	654.604	5.97913	663.632	12.3418	694.423	49.9443	654.604	5.97913	94.266
12RKB3104-13	167.446	72501.6	1.05228	16.3095	2.16167	0.859713	2.54279	0.101693	1.33901	0.526592	624.326	7.96774	629.966	11.9363	650.266	46.4373	624.326	7.96774	96.0108
12RKB3104-14	170.489	86867.5	2.33738	12.8553	1.01605	2.05628	2.57762	0.191718	2.36891	0.919033	1130.67	24.5673	1134.38	17.6109	1141.47	20.1837	1141.47	20.1837	99.0537
12RKB3104-15	143.465	120532	1.29573	10.7284	0.875836	3.42027	4.65323	0.266129	4.57006	0.982127	1521.12	61.9252	1509.06	36.5749	1492.16	16.5777	1492.16	16.5777	101.941
12RKB3104-16	219.201	46869.2	0.769531	16.4576	2.26345	0.809724	2.50462	0.0966502	1.07234	0.428144	594.748	6.09234	602.299	11.3793	630.845	48.7568	594.748	6.09234	94.2779
12RKB3104-17	170.689	135734	2.50309	10.6042	0.629235	3.36081	2.49894	0.258477	2.41842	0.967779	1482.04	32.0206	1495.31	19.5576	1514.16	11.8736	1514.16	11.8736	97.879
12RKB3104-18	131.708	292154	2.15604	8.52594	0.562883	5.57602	1.46289	0.344799	1.35027	0.923011	1909.71	22.3176	1912.4	12.5958	1915.31	10.1	1915.31	10.1	99.708
12RKB3104-19	229.935	192922	1.83156	12.1558	0.949789	2.3775	2.92758	0.209606	2.76923	0.94591	1226.72	30.9343	1235.86	20.9279	1251.82	18.5841	1251.82	18.5841	97.995
12RKB3104-20	214.213	115440	1.9348	13.5825	0.962432	1.76702	1.33326	0.174068	0.922665	0.692036	1034.49	8.81838	1033.43	8.64539	1031.16	19.4727	1031.16	19.4727	100.323
12RKB3104-21	57.8953	52220.7	0.892342	13.4377	2.87438	1.77208	3.7651	0.172706	2.43185	0.645893	1027.01	23.0875	1035.28	24.4438	1052.82	57.9061	1052.82	57.9061	97.5477
12RKB3104-22	209.67	169314	2.84324	9.50443	0.609773	4.54535	3.06209	0.313323	3.00076	0.979972	1757.04	46.1506	1739.31	25.4904	1718.04	11.2085	1718.04	11.2085	102.27
12RKB3104-23	165.243	27070.4	1.36101	9.78277	0.454406	3.75191	2.31006	0.266203	2.26492	0.980462	1521.5	30.6962	1582.52	18.5219	1664.81	8.4074	1664.81	8.4074	91.3918
12RKB3104-24	215.945	7957.45	1.18405	18.3977	5.71933	0.419859	5.91615	0.0560228	1.51334	0.255798	351.392	5.17542	355.95	17.7653	385.756	128.561	351.392	5.17542	NA
12RKB3104-25	381.6	100179	1.81316	16.714	1.38724	0.798569	1.52068	0.0968036	0.622923	0.409635	595.649	3.54417	596.021	6.85581	597.448	30.0282	595.649	3.54417	99.699
12RKB3104-26B	234.713	124818	2.55875	13.8539	0.735151	1.65397	1.1385	0.166188	0.86933	0.763575	991.072	7.98608	991.072	7.20447	991.091	14.932	991.091	14.932	99.9982
12RKB3104-27	490.971	26362.3	1.73929	9.34066	0.406176	4.28253	3.74322	0.29012	3.72112	0.994095	1642.13	53.9447	1690.01	30.8224	1749.92	7.43638	1749.92	7.43638	93.8399
12RKB3104-27B	417.035	165292	3.40701	12.2425	0.418694	2.40412	0.791849	0.213465	0.672101	0.848774	1247.25	7.62171	1243.83	5.67843	1237.93	8.20884	1237.93	8.20884	100.753
12RKB3104-28	546.942	85899.9	1.42531	16.4724	0.441125	0.833895	2.48122	0.0996249	2.44169	0.984069	612.21	14.2605	615.771	11.4565	628.867	9.52518	612.21	14.2605	97.3513
12RKB3104-29	210.233	54973.4	2.56909	10.8988	0.986255	3.31889	1.65504	0.262345	1.32908	0.803052	1501.83	17.806	1485.5	12.9147	1462.26	18.7428	1462.26	18.7428	102.706
12RKB3104-30	89.4006	13303	1.73436	13.0887	2.54368	1.91874	2.89276	0.182142	1.37759	0.476219	1078.66	13.6829	1087.63	19.3115	1105.64	50.8329	1105.64	50.8329	97.5603
12RKB3104-32B	267.885	21051.5	1.03477	18.1339	3.50963	0.524859	3.70939	0.069029	1.20086	0.323735	430.303	4.99865	428.392	12.9649	418.103	78.3916	430.303	4.99865	102.918
12RKB3104-33	237.16	48655	1.17072	18.403	2.71057	0.485675	3.1226	0.0648237	1.5503	0.496478	404.894	6.08402	401.959	10.3653	385.099	60.9025	404.894	6.08402	105.14
12RKB3104-34	448.516	38176.1	1.0775	16.2117	1.07875	0.876311	4.19031	0.103035	4.04908	0.966295	632.171	24.3822	638.988	19.874	663.148	23.112	632.171	24.3822	95.3288
12RKB3104-34B	307.346	19705.5	0.656612	8.12676	0.281572	5.25424	3.15083	0.309689	3.13823	0.995999	1739.18	47.8375	1861.46	26.8839	2000.9	4.9998	2000.9	4.9998	86.9196
12RKB3104-35	309.969	119964	2.45701	12.9328	0.741047	2.06266	1.1635	0.193473	0.896982	0.770935	1140.16	9.37366	1136.5	7.95671	1129.53	14.7605	1129.53	14.7605	100.941
12RKB3104-36	315.389	38479.5	0.502551	16.4132	1.57246	0.868406	2.8777	0.103375	2.41009	0.837505	634.157	14.5561	634.701	13.5817	636.659	33.8447	634.157	14.5561	99.607
12RKB3104-36B	275.657	48724.2	1.10697	16.2343	3.41072	0.892814	5.26152	0.105122	4.00632	0.761437	644.357	24.5668	647.88	25.2048	660.179	73.1484	644.357	24.5668	97.6034
12RKB3104-37	244.7	135346	3.17931	10.2444	0.366791	3.75396	1.5227	0.278916	1.47787	0.970555	1585.9	20.7772	1582.96	12.2096	1579.02	6.86169	1579.02	6.86169	100.436
12RKB3104-38	238.228	30091.6	2.31486	15.5264	1.60286	0.892048	3.50401	0.100452	3.11592	0.889242	617.058	18.3355	647.469	16.7761	754.978	33.8313	617.058	18.3355	81.7319
12RKB3104-38B	312.257	228096	2.564	10.6245	0.355215	3.50988	1.23408	0.270459	1.18185	0.957679	1543.13	16.2189	1529.44	9.75243	1510.54	6.70691	1510.54	6.70691	102.157
12RKB3104-39	116.517	37344.1	1.16345	14.8161	3.28422	1.22923	4.17548	0.132088	2.57847	0.617528	799.765	19.3939	813.986	23.3825	853.044	68.2724	853.044	68.2724	93.7543
12RKB3104-39B	93.2907	72749.5	2.22313	10.1985	0.914659	3.97557	1.77646	0.294059	1.52289	0.857263	1661.78	22.3084	1629.22	14.4135	1587.41	17.0948	1587.41	17.0948	104.685
12RKB3104-40	197.027	386462	2.08053	5.25015	0.150448	14.098	0.93662	0.536818	0.924458	0.987015	2770.12	20.8167	2756.32	8.8806	2746.22	2.47381	2746.22	2.47381	100.87
12RKB3104-41	155.882	198997	1.66466	5.18419	0.31319	14.5723	1.04762	0.547909	0.999713	0.954268	2816.47	22.8117	2787.73	9.95461	2766.98	5.1398	2766.98	5.1398	101.788
12RKB3104-42	263.283	102410	3.30558	12.6807	0.685726	2.17842	1.2396	0.200347	1.03266	0.83306	1177.19	11.111	1174.17	8.62686	1168.61	13.5986	1168.61	13.5986	100.734
12RKB3104-44	518.241	60649.3	2.1237	17.8916	1.50589	0.506369	2.38259	0.0657077	1.84635	0.774936	410.244	7.33856	416.005	8.1325	448.061	33.4612	410.244	7.33856	91.5597
12RKB3104-45	366.407	48235.8	2.69181	19.0835	3.2634	0.400496	3.37972	0.0554312	0.87908	0.260104	347.78	2.97626	342.008	9.81389	302.986	74.4039	347.78	2.97626	NA
12RKB3104-46	88.2823	40377.5	2.20452	10.6206	0.784237	3.37971	1.44846	0.260332	1.21779	0.840748	1491.54	16.2157	1499.7	11.3498	1511.24	14.8046	1511.24	14.8046	98.6961
12RKB3104-47	101.527	60068.6	0.869972	9.88969	0.558489	3.94135	0.668474	0.282701	0.367351	0.549537	1604.95	5.21916	1622.22	5.41399	1644.67	10.3619	1644.67	10.3619	97.5848
12RKB3104-48	125.742	22729.6	2.50977	11.567	1.7869	2.75569	2.75626	0.23118	2.09856	0.76138	1340.68	25.4022	1343.63	20.5376	1348.3	34.4945	1348.3	34.4945	99.4348
12RKB3104-49	82.2166	34824.5	1.44088	13.3675	2.73885	1.85281	2.86101	0.179631	0.827116	0.289099	1064.96	8.11931	1064.43	18.8694	1063.37	55.1198	1063.37	55.1198	100.149
12RKB3104-50	145.641	70261.7	1.36216	11.9073	0.9981	2.58506	1.33238	0.223245	0.88263	0.662446	1299	10.384	1296.42	9.75542	1292.12	19.401	1292.12	19.401	100.533
12RKB3104-51	46.121	103034	0.977721	9.74349	2.36972	4.37179	3.35313	0.308939	2.37232	0.707495	1735.48	36.0952	1707.02	27.7158	1672.25	43.8142	1672.25	43.8142	103.781
12RKB3104-51	180.479	60484.2	2.38918	13.601	1.62274	1.74268	1.7423	0.171905	0.634296	0.364056	1022.6	5.99799	1024.46	11.2412	1028.42	32.8162	1028.42	32.8162	99.4342
12RKB3104-53	63.1188	50437.4	2.38415	10.5272	1.31683	3.1484	2.36046	0.240382	1.95901	0.829927	1388.68	24.474	1444.61	18.1921	1527.89	24.8058	1527.89	24.8058	90.8891
12RKB3104-54	70.2596	11251.5	1.51993	16.5726	8.63461	0.706063	9.01843	0.0848656	2.603	0.288631	525.1	13.1265	542.406	37.915	615.794	186.768	525.1	13.1265	85.272
12RKB3104-55	239.02	120163	2.67182	10.0695	0.8555	3.3422	3.70631	0.244084	3.60622	0.972996	1407.89	45.6107	1490.97	28.9742	1611.17	15.9397	1611.17	15.9397	87.383
12RKB3104-56	98.2646	10793.8	1.71277	12.5623	2.68375	2.09191	2.83005	0.190596	0.898137	0.317357	1124.6	9.26851	1146.15	19.4444	1187.19	53.0262	1187.19	53.0262	94.728
12RKB3104-57	84.7245	37404.9	3.88039	9.00941	1.12595	4.89099	1.61584	0.319589	1.15896	0.717249	1787.72	18.0943	1800.7	13.6227	1815.76	20.4459	1815.76	20.4459	98.4559
12RKB3104-58	115.489	34560.1	2.87365	11.6762	1.07489	2.65648	1.81009	0.224961	1.45638	0.804589	1308.04	17.2416	1316.44	13.3536	1330.15	20.802	1330.15	20.802	98.3376
12RKB3104-59	406.862	130408	2.10547	10.8813	0.346805	3.21986	1.95595	0.254106	1.92496	0.984155	1459.62	25.1433	1461.95	15.1551	1465.32	6.58782	1465.32	6.58782	99.6108
12RKB3104-60	327.165	81210.9	3.75654	12.1636	1.5766	2.06887	2.5103	0.182513	1.95343	0.778169	1080.69	19.436	1138.56	17.1851	1250.56	30.8445	1250.56	30.8445	86.4166
12RKB3104-61	214.54	38393	1.55348	16.8293	3.72342	0.768457	4.88145	0.0937957	3.15668	0.64667	577.947	17.4501	578.877	21.5411	582.544	80.8976	577.947	17.4501	99.2108
12RKB3104-62	607.115	6711.18	0.995975	13.7237	1.07799	1.51033	2.30376	0.150329	2.03598	0.883768	902.808	17.152	934.574	14.0746	1010.22	21.8491	1010.22	21.8491	89.3672
12RKB3104-63	510.028	37067.7	2.02014	11.9901	0.529213	2.14616	1.93023	0.186631	1.85626	0.961681	1103.1	18.8203	1163.81	13.3704	1278.62	10.316	1278.62	10.316	86.2721
12RKB3104-64	127.099	35276.5	1.22168	13.4541	1.93426	1.73572	2.6252	0.169369	1.77491	0.676104	1008.63	16.5721	1021.88	16.9138	1050.37	39.004	1050.37	39.004	96.0264
12RKB3104-65	84.4569	6634.39	1.12932	12.3673	4.79319	2.03442	5.1948	0.18248	2.00283	0.385545	1080.51	19.9244	1127.1	35.3785	1217.99	94.2792	1217.99	94.2792	88.7125
12RKB3104-65	55.0449	10042.8	0.980478	16.0571	5.84761	1.00311	7.89602	0.116819	5.30591	0.671972	712.229	35.7778	705.387	40.1706	683.68	124.964	712.229	35.7778	104.176
12RKB3104-66	298.92	162110	1.55108	7.48443	0.782939	5.98551	3.07309	0.324907	2.97169	0.967001	1813.65	46.9788	1973.74	26.743	2145.94	13.6792	2145.94	13.6792	84.5151
12RKB3104-67	199.343	280806	2.02981	5.34124	0.138774	13.4331	0.94705	0.520376	0.936827	0.989206	2700.77	20.6702	2710.59	8.95015	2717.9	2.28777	2717.9	2.28777	99.3699
12RKB3104-68	98.751	46844.4	4.26197	8.50418	1.04934	5.37755	1.43258	0.331677	0.975284	0.680786	1846.51	15.6591	1881.29	12.266	1919.89	18.817	1919.89	18.817	96.1776
12RKB3104-69	646.119	71992.3	1.1657	18.6442	2.6356	0.396308	3.1605	0.0535891	1.74424	0.551887	336.519	5.71913	338.967	9.10856	355.796	59.5021	336.519	5.71913	NA
12RKB3104-70	403.185	102882	4.79248	17.1365	1.25417	0.718723	1.4888	0.0893268	0.80224	0.538849	551.554	4.24078	549.913	6.32162	543.139	27.4169	551.554	4.24078	101.549
12RKB3104-70-B	144.605	6648.06	1.59851	11.3058	0.686787	2.85168	2.15906	0.23383	2.04691	0.948059	1354.54	25.0071	1369.25	16.2323	1392.27	13.1759	1392.27	13.1759	97.2902
12RKB3104-71	332.387	1566.33	0.87022	16.9484	7.19468	0.564629	7.35314	0.0694048	1.5183	0.206483	432.569	6.35218	454.535	26.9499	567.218	156.817	432.569	6.35218	76.2615
12RKB3104-71B	24.3828	10465.4	1.39897	13.6497	4.88731	1.78872	5.99943	0.177078	3.47956	0.579982	1050.99	33.7447	1041.36	39.0924	1021.18	98.9797	1021.18	98.9797	102.92
12RKB3104-72	125.758	26766.1	1.06256	9.93224	1.35432	3.79378	1.77874	0.273287	1.15314	0.648292	1557.46	15.9549	1591.43	14.2944	1636.7	25.1524	1636.7	25.1524	95.1587
12RKB3104-73	744.648	6413.79	1.94598	17.7779	1.72906	0.51884	1.85447	0.0668979	0.670392	0.3615	417.439	2.7098	424.376	6.43246	462.216	38.3478	417.439	2.7098	90.3127
12RKB3104-74	91.1442	209033	1.74741	10.613	1.89071	3.3636	2.0603	0.258906	0.81855	0.397297	1484.24	10.8521	1495.96	16.1271	1512.59	35.6909	1512.59	35.6909	98.1259
12RKB3104-76	245.401	85381.2	1.87671	9.93658	0.332536	3.87801	1.1463	0.279476	1.09701	0.956998	1588.72	15.4469	1609.12	9.25352	1635.89	6.17664	1635.89	6.17664	97.1166
12RKB3104-77	345.587	45924.7	8.30012	17.4573	1.72072	0.600386	1.98667	0.0760164	0.992975	0.499818	472.301	4.52215	477.479	7.56781	502.445	37.8684	472.301	4.52215	94.0006
12RKB3104-78	226.466	17529.2	2.89157	18.2003	3.15089	0.344813	3.32018	0.0455156	1.04666	0.315241	286.931	2.93733	300.813	8.64419	409.935	70.4703	286.931	2.93733	NA
12RKB3104-79	200.66	177989	1.1575	5.84602	0.238667	11.112	1.46961	0.471142	1.4501	0.986725	2488.57	29.9376	2532.57	13.691	2567.99	3.99122	2567.99	3.99122	96.907
12RKB3104-80	249.782	118865	2.21242	13.3476	0.750838	1.83812	1.03623	0.17794	0.714151	0.689183	1055.71	6.95439	1059.19	6.81452	1066.38	15.095	1066.38	15.095	98.9996
12RKB3104-81	179.327	79824.1	1.29146	9.83085	0.526554	4.0869	1.7648	0.291396	1.68442	0.954452	1648.5	24.5016	1651.69	14.3978	1655.74	9.75384	1655.74	9.75384	99.5631
12RKB3104-82	459.633	544844	2.25284	9.32463	0.170473	4.5496	1.42823	0.307683	1.41802	0.992851	1729.29	21.5082	1740.09	11.8894	1753.07	3.11983	1753.07	3.11983	98.6438
12RKB3104-83	36.8344	20997.4	2.06842	13.1032	2.72443	2.0579	3.0715	0.195569	1.41831	0.461764	1151.47	14.956	1134.92	20.9915	1103.38	54.4658	1103.38	54.4658	104.358
12RKB3104-84	256.69	54932.1	1.02398	16.3117	2.34873	0.835189	3.05621	0.0988061	1.95547	0.639835	607.409	11.3353	616.487	14.1236	649.991	50.4159	607.409	11.3353	93.4488
12RKB3104-85	244.925	131825	1.31799	16.3132	1.69476	0.832029	2.75717	0.0984409	2.17481	0.788781	605.266	12.5643	614.737	12.7152	649.762	36.4118	605.266	12.5643	93.1519
12RKB3104-86	43.7565	34479.8	2.12937	5.86314	1.34778	10.2007	2.01492	0.43377	1.4978	0.743353	2322.69	29.2115	2453.14	18.6346	2563.1	22.5475	2563.1	22.5475	90.6202
12RKB3104-87	210.251	75601.8	3.73916	17.6865	1.63888	0.625641	1.99686	0.080254	1.14084	0.571316	497.639	5.46366	493.377	7.80345	473.638	36.2703	497.639	5.46366	105.067
12RKB3104-88	369.556	50217.5	15.5669	16.4398	1.94557	0.821139	2.32096	0.0979068	1.26555	0.545271	602.13	7.27522	608.684	10.6264	633.173	41.9153	602.13	7.27522	95.0972
12RKB3104-89	36.0269	14031.2	1.4112	13.6246	8.56202	1.81702	8.68421	0.179548	1.45163	0.167157	1064.5	14.2443	1051.61	56.9357	1024.91	173.527	1024.91	173.527	103.863
12RKB3104-90	213.21	43539.5	2.15619	18.4663	3.36084	0.424621	3.7634	0.0568696	1.6935	0.449992	356.56	5.87439	359.35	11.3902	377.383	75.6373	356.56	5.87439	NA
12RKB3104-91	211.435	104030	2.43915	9.32709	1.19037	3.52519	2.89973	0.238466	2.64414	0.911856	1378.72	32.8208	1532.88	22.9407	1752.58	21.7851	1752.58	21.7851	78.6678
12RKB3104-92	77.0766	77066.1	1.68381	9.43463	1.4269	4.5018	1.60798	0.308042	0.741308	0.461019	1731.06	11.254	1731.3	13.3603	1731.58	26.1834	1731.58	26.1834	99.9701
12RKB3104-93	135.37	78823.1	1.24378	10.1266	0.553814	3.83844	1.6771	0.281916	1.58302	0.943904	1601	22.4423	1600.85	13.5103	1600.62	10.3337	1600.62	10.3337	100.024
12RKB3104-94	149.134	66348.9	1.56559	7.72696	0.670554	6.6481	2.23028	0.372568	2.12709	0.953732	2041.47	37.2203	2065.75	19.6874	2090.05	11.7911	2090.05	11.7911	97.6758
12RKB3104-95	134.279	133922	0.832335	8.73255	0.677232	5.33578	1.70125	0.337939	1.56065	0.917352	1876.74	25.4113	1874.61	14.5488	1872.24	12.2147	1872.24	12.2147	100.241
12RKB3104-96	71.8946	28954.6	1.04749	12.3607	3.20941	2.04777	3.45845	0.183579	1.28861	0.372598	1086.5	12.8845	1131.55	23.5987	1219.07	63.112	1219.07	63.112	89.1252
12RKB3104-97	269.371	51036.2	1.83735	16.6063	1.76792	0.861835	2.13462	0.103799	1.19628	0.560418	636.636	7.25198	631.124	10.0334	611.407	38.1921	636.636	7.25198	104.126
12RKB3104-98	348.743	77995.5	8.91332	14.2802	1.94643	1.2777	2.25737	0.132331	1.14329	0.50647	801.152	8.61319	835.831	12.8584	929.146	39.9684	929.146	39.9684	86.2245
12RKB3104-99	82.5131	48428.8	0.813973	9.17693	1.05271	4.70435	1.69393	0.313109	1.3271	0.783445	1755.99	20.3995	1768.01	14.1856	1782.23	19.1948	1782.23	19.1948	98.5276
12RKB3104-100	302.398	46251.7	1.83214	18.1175	3.38628	0.508304	3.63351	0.0667912	1.31739	0.362567	416.795	5.31707	417.308	12.434	420.124	75.6187	416.795	5.31707	99.2077
12RKB3104-100	54.2653	30584.6	1.75319	7.69034	0.83982	6.91291	1.97638	0.385572	1.78907	0.905227	2102.26	32.0942	2100.32	17.5335	2098.4	14.7514	2098.4	14.7514	100.184
17c--Chase Group, Rebecca K. Bounds Core, Depth 2862 ft. ( 38.48963, -101.97456)
12RKB2862-1	117.896	17879.9	2.01213	15.7714	7.01272	0.918017	7.58408	0.105008	2.88792	0.380787	643.688	17.6913	661.31	36.8741	721.849	148.991	643.688	17.6913	89.1722
12RKB2862-1	212.286	370834	3.57286	9.30122	0.560621	4.602	1.28146	0.310445	1.15232	0.899225	1742.9	17.5978	1749.63	10.6894	1757.67	10.2541	1757.67	10.2541	99.1597
12RKB2862-3	228.776	18488.3	0.674188	16.4055	1.9702	0.913487	3.91104	0.10869	3.37854	0.863847	665.135	21.3515	658.909	18.9605	637.677	42.3731	665.135	21.3515	104.306
12RKB2862-5	239.415	65224.1	0.943763	16.0652	2.77625	0.867289	3.17917	0.101053	1.54905	0.48725	620.574	9.1648	634.094	14.9943	682.569	59.2999	620.574	9.1648	90.9175
12RKB2862-6	88.272	10337.2	2.07716	8.60608	0.795594	5.41766	1.42438	0.338155	1.18148	0.829467	1877.79	19.2466	1887.65	12.2099	1898.5	14.3025	1898.5	14.3025	98.909
12RKB2862-8	24.1182	5802.05	0.72385	18.7136	15.6667	0.709209	16.2469	0.0962567	4.3027	0.264833	592.434	24.3545	544.276	68.5547	347.391	356.227	592.434	24.3545	170.538
12RKB2862-10	75.8646	17489.6	2.43264	15.5481	4.61966	0.900762	4.90839	0.101575	1.65863	0.337917	623.633	9.85918	652.135	23.6227	752.032	97.5729	623.633	9.85918	82.9264
12RKB2862-11	171.29	106544	2.85586	9.36628	0.516189	4.57357	1.54903	0.310686	1.4605	0.942845	1744.08	22.3174	1744.46	12.9073	1744.91	9.45465	1744.91	9.45465	99.9526
12RKB2862-12	119.28	14353	1.78116	16.0248	6.84199	0.802606	7.07811	0.093281	1.81294	0.256133	574.913	9.97155	598.297	32.0105	687.958	146.152	574.913	9.97155	83.568
12RKB2862-13	252.535	140371	2.98563	11.0195	0.944512	3.13705	1.36667	0.250716	0.987771	0.722756	1442.17	12.7643	1441.83	10.523	1441.3	18.0003	1441.3	18.0003	100.06
12RKB2862-14	267.675	14174.9	0.906006	19.4723	5.14054	0.326757	5.42709	0.0461467	1.74016	0.320644	290.821	4.94831	287.087	13.5724	256.804	118.217	290.821	4.94831	NA
12RKB2862-15	29.9563	31414.5	3.42288	12.9808	8.95666	2.02326	9.15019	0.19048	1.87195	0.204581	1123.98	19.3082	1123.35	62.2558	1122.13	178.917	1122.13	178.917	100.164
12RKB2862-16	187.84	18165.8	1.81897	18.076	4.68131	0.404505	5.92228	0.0530303	3.62749	0.612517	333.099	11.7763	344.91	17.3205	425.241	104.478	333.099	11.7763	NA
12RKB2862-17	142.07	8624.88	2.06365	11.4967	1.14054	2.77334	3.0303	0.231247	2.80747	0.926466	1341.03	33.9913	1348.39	22.6186	1360.06	21.9806	1360.06	21.9806	98.6006
12RKB2862-18	211.715	148457	1.91413	7.78187	0.470144	6.4494	0.758524	0.364	0.595251	0.784749	2001.11	10.2401	2039.02	6.66812	2077.59	8.27651	2077.59	8.27651	96.3188
12RKB2862-19	128.785	46082.2	2.15459	12.7799	2.14323	2.03376	3.51193	0.188505	2.78213	0.792193	1113.27	28.446	1126.87	23.9097	1153.16	42.5454	1153.16	42.5454	96.5409
12RKB2862-20	135.757	196746	1.9474	5.03452	0.216824	14.1285	0.962121	0.515883	0.937371	0.974276	2681.7	20.5644	2758.37	9.12371	2814.95	3.54283	2814.95	3.54283	95.2662
12RKB2862-21	82.3725	23741.2	1.31917	16.3647	7.99586	0.921072	8.27995	0.10932	2.15029	0.259698	668.797	13.6602	662.927	40.3307	643.034	172.14	668.797	13.6602	104.006
12RKB2862-23	126.991	73832.3	1.0279	10.8477	0.977646	3.25995	1.53951	0.256475	1.18924	0.77248	1471.78	15.6487	1471.55	11.9629	1471.2	18.5569	1471.2	18.5569	100.04
12RKB2862-24	125.005	150262	3.05915	9.92237	0.94756	3.99768	1.11738	0.287688	0.592173	0.529965	1629.97	8.52861	1633.72	9.07574	1638.55	17.5946	1638.55	17.5946	99.4762
12RKB2862-25	134.168	87198	1.81326	9.28486	0.382136	4.70423	0.993085	0.316784	0.916619	0.923001	1774	14.2153	1767.99	8.31606	1760.89	6.98668	1760.89	6.98668	100.745
12RKB2862-26	51.576	11280.7	0.693118	16.3679	6.55616	0.7707	6.7971	0.0914906	1.79367	0.263888	564.346	9.69209	580.165	30.0484	642.612	141.066	564.346	9.69209	87.8207
12RKB2862-28	91.3114	108629	2.46326	11.5232	1.43085	2.92486	1.78068	0.244442	1.05995	0.59525	1409.75	13.4216	1388.37	13.4748	1355.63	27.593	1355.63	27.593	103.992
12RKB2862-29	643.514	30682.6	1.53753	8.39591	0.490371	5.68472	1.54049	0.346159	1.46035	0.947982	1916.23	24.2079	1929.05	13.3026	1942.83	8.77037	1942.83	8.77037	98.6308
12RKB2862-30	94.5977	60990.1	2.18543	10.1995	0.746353	3.75185	1.8382	0.277538	1.67987	0.913863	1578.95	23.5257	1582.51	14.7379	1587.24	13.9491	1587.24	13.9491	99.4776
12RKB2862-31	674.781	4918.21	1.27405	17.486	4.6625	0.483543	5.33505	0.0613232	2.59305	0.486041	383.668	9.65845	400.501	17.6582	498.792	102.744	383.668	9.65845	NA
12RKB2862-33	262.609	146077	3.35814	10.6648	0.783062	3.34235	1.62598	0.258525	1.425	0.876394	1482.29	18.8701	1491	12.7085	1503.4	14.7994	1503.4	14.7994	98.5958
12RKB2862-34	313.607	38530.3	1.78627	18.2552	2.0812	0.456384	2.35528	0.0604248	1.1027	0.468182	378.208	4.05053	381.74	7.49437	403.19	46.6099	378.208	4.05053	NA
12RKB2862-36	92.0766	118284	1.78222	5.40387	0.340112	13.1718	1.72029	0.516237	1.68634	0.980261	2683.2	37.0126	2692.04	16.2364	2698.67	5.6172	2698.67	5.6172	99.4269
12RKB2862-37	173.333	33046.7	2.6172	17.1403	2.04467	0.699688	2.37637	0.0869807	1.21097	0.509589	537.656	6.24673	538.605	9.93328	542.607	44.7043	537.656	6.24673	99.0875
12RKB2862-38	210.378	85203.5	3.28505	9.15848	0.29953	4.76102	2.20703	0.316244	2.18661	0.990748	1771.36	33.8673	1778.05	18.522	1785.9	5.45947	1785.9	5.45947	99.1858
12RKB2862-39	109.403	25223.7	1.11628	9.64013	1.95155	3.65087	5.13148	0.255257	4.7459	0.924859	1465.53	62.215	1560.7	40.9232	1691.94	35.9904	1691.94	35.9904	86.6181
12RKB2862-40	400.33	232961	1.58979	7.26149	0.187781	7.8182	1.1719	0.411748	1.15676	0.987079	2222.91	21.7489	2210.3	10.5503	2198.62	3.26237	2198.62	3.26237	101.105
12RKB2862-41	119.5	76831.1	2.37074	10.6488	1.38838	3.38268	1.64834	0.261253	0.8885	0.539027	1496.25	11.8641	1500.39	12.9188	1506.23	26.229	1506.23	26.229	99.3371
12RKB2862-42	152.025	6415.88	2.65466	16.8111	6.99864	0.742599	7.42661	0.090542	2.48467	0.334564	558.742	13.2983	563.921	32.1457	584.891	152.08	558.742	13.2983	95.5293
12RKB2862-43	505.543	75639.4	1.75307	17.8883	2.96917	0.53252	3.20819	0.0690881	1.21511	0.378753	430.66	5.06202	433.481	11.3198	448.476	65.9809	430.66	5.06202	96.0274
12RKB2862-44	127.217	34866.4	1.07143	14.3706	1.72986	1.54379	2.35208	0.160902	1.5937	0.67757	961.788	14.2394	948.018	14.495	916.199	35.6094	916.199	35.6094	104.976
12RKB2862-45	242.026	128618	4.82048	13.5056	1.03475	1.78646	1.4263	0.174987	0.981637	0.688241	1039.53	9.42413	1040.54	9.28523	1042.64	20.8986	1042.64	20.8986	99.7018
12RKB2862-46	469.604	783774	4.17628	5.4801	0.291275	10.3533	1.49766	0.411497	1.46907	0.980905	2221.76	27.6089	2466.88	13.8685	2675.51	4.82092	2675.51	4.82092	83.0406
12RKB2862-47	270.775	32079.8	2.15184	15.5388	3.03536	1.00689	3.3656	0.113474	1.45391	0.431991	692.894	9.55155	707.302	17.1472	753.304	64.1126	692.894	9.55155	91.9806
12RKB2862-48	142.051	36865.6	1.97429	11.6118	0.99592	2.74032	1.29381	0.23078	0.825881	0.638334	1338.59	9.98284	1339.46	9.62509	1340.85	19.2437	1340.85	19.2437	99.8314
12RKB2862-49	79.1508	77701.9	1.90752	8.94007	0.918791	5.13776	2.25731	0.33313	2.06186	0.913415	1853.53	33.2141	1842.37	19.1883	1829.77	16.6552	1829.77	16.6552	101.299
12RKB2862-51	333.816	239235	2.86378	13.4316	0.946163	1.85142	1.17543	0.180357	0.697427	0.593339	1068.93	6.86969	1063.94	7.74958	1053.74	19.079	1053.74	19.079	101.441
12RKB2862-53	58.3576	9690.03	1.31757	18.8625	10.9696	0.542516	11.3657	0.0742183	2.97432	0.261692	461.52	13.2473	440.082	40.6108	329.44	249.51	461.52	13.2473	140.092
12RKB2862-54	234.923	159564	1.06453	9.60771	0.529888	4.21994	0.86919	0.294053	0.688992	0.792683	1661.75	10.0927	1677.91	7.13498	1698.15	9.76277	1698.15	9.76277	97.8562
12RKB2862-55	541.42	66083	3.71166	17.2061	1.17744	0.740285	5.06216	0.0923804	4.92333	0.972573	569.6	26.8402	562.572	21.8681	534.257	25.791	569.6	26.8402	106.615
12RKB2862-56	131.963	61148.5	1.78671	11.1811	1.99892	3.01662	2.10257	0.244626	0.652026	0.310109	1410.7	8.26127	1411.83	16.0353	1413.51	38.2414	1413.51	38.2414	99.801
12RKB2862-57	185.087	25800.5	11.1495	16.8318	3.16133	0.807164	3.32523	0.098535	1.03109	0.31008	605.818	5.96198	600.862	15.0816	582.216	68.6585	605.818	5.96198	104.054
12RKB2862-58	277.591	233311	1.83022	9.88214	0.43874	3.99405	2.38732	0.286262	2.34666	0.982967	1622.82	33.6671	1632.99	19.3889	1646.09	8.13864	1646.09	8.13864	98.5865
12RKB2862-59	176.762	155656	0.98797	7.55002	0.400497	6.98316	1.58329	0.382384	1.5318	0.967479	2087.41	27.3146	2109.29	14.0636	2130.68	7.01029	2130.68	7.01029	97.9689
12RKB2862-60	63.6364	20259.7	0.80778	15.7428	6.31349	0.828526	7.8204	0.0945992	4.61504	0.590128	582.68	25.7115	612.794	35.9953	725.702	134	582.68	25.7115	80.2919
12RKB2862-61	244.874	164756	2.05392	9.92064	0.546531	4.10279	3.35319	0.295201	3.30835	0.986628	1667.47	48.6092	1654.86	27.382	1638.87	10.1476	1638.87	10.1476	101.745
12RKB2862-62	143.984	106370	1.69222	5.45359	1.07527	12.4729	2.81913	0.493342	2.60601	0.924402	2585.12	55.5002	2640.69	26.5064	2683.54	17.7809	2683.54	17.7809	96.3326
12RKB2862-63	263.857	311868	6.46405	7.69735	0.261909	6.60977	2.124	0.369	2.10779	0.992368	2024.69	36.6246	2060.65	18.7348	2096.8	4.60187	2096.8	4.60187	96.5612
12RKB2862-65	291.657	39871.1	2.33481	17.2406	1.88111	0.730246	2.88856	0.0913103	2.19208	0.758883	563.282	11.8235	556.698	12.3792	529.884	41.2373	563.282	11.8235	106.303
12RKB2862-66	157.943	192672	1.28753	8.24002	0.710685	5.96528	1.18546	0.356498	0.948812	0.800374	1965.56	16.0745	1970.8	10.3092	1976.28	12.6611	1976.28	12.6611	99.4571
12RKB2862-67	94.1462	33156.8	2.53204	11.6166	1.51067	2.73865	1.96994	0.230736	1.26433	0.641814	1338.35	15.2803	1339.01	14.6533	1340.04	29.195	1340.04	29.195	99.8741
12RKB2862-68	315.312	434009	2.07314	13.2586	0.978053	1.95063	1.76391	0.187574	1.46792	0.832197	1108.22	14.9463	1098.66	11.841	1079.77	19.6138	1079.77	19.6138	102.635
12RKB2862-69	137.615	97838.2	2.01869	9.85942	1.05346	4.17222	1.99225	0.298344	1.69094	0.848759	1683.09	25.0481	1668.58	16.3193	1650.36	19.5298	1650.36	19.5298	101.983
12RKB2862-70	164.511	90972	0.94122	13.6405	1.72344	1.6804	2.33734	0.166243	1.5789	0.675511	991.375	14.5086	1001.13	14.8798	1022.55	34.902	1022.55	34.902	96.9516
12RKB2862-71	191.509	205981	0.993334	8.07261	1.33069	5.84077	1.68726	0.341966	1.03735	0.614817	1896.12	17.0407	1952.48	14.6287	2012.77	23.605	2012.77	23.605	94.2046
12RKB2862-73	290.356	20703.2	1.5158	16.1341	3.95639	0.818253	4.08685	0.0957485	1.02435	0.250645	589.445	5.77016	607.073	18.6767	673.452	84.6457	589.445	5.77016	87.5259
12RKB2862-74	131.601	68426.4	2.19451	9.05794	1.0718	4.8645	2.20245	0.319571	1.92407	0.873603	1787.63	30.0384	1796.13	18.552	1805.99	19.4858	1805.99	19.4858	98.9832
12RKB2862-75	268.407	44001.9	2.07012	14.3537	1.87253	1.10585	3.01513	0.115122	2.36319	0.783776	702.428	15.7273	756.177	16.0784	918.618	38.5106	918.618	38.5106	76.4658
12RKB2862-77	295.174	54353.7	1.02023	16.1086	1.57726	0.968801	3.29048	0.113186	2.88782	0.877629	691.223	18.9284	687.846	16.4422	676.821	33.7062	691.223	18.9284	102.128
12RKB2862-79	71.1343	52213.5	1.28568	6.73797	0.520534	8.88994	4.04955	0.434437	4.01595	0.991704	2325.69	78.4103	2326.77	36.9771	2327.7	8.91916	2327.7	8.91916	99.9135
12RKB2862-81	594.132	174656	3.24686	16.6993	1.24503	0.71631	2.08023	0.0867555	1.66651	0.801119	536.32	8.57613	548.486	8.8157	599.365	26.9495	536.32	8.57613	89.4815
12RKB2862-82	92.8487	52631.2	2.58631	9.84257	0.978108	4.07846	2.27858	0.291141	2.05797	0.90318	1647.23	29.9151	1650.01	18.5826	1653.53	18.1253	1653.53	18.1253	99.6191
12RKB2862-83	378.726	186843	2.40584	11.0382	0.659314	3.08643	0.947482	0.24709	0.680461	0.718178	1423.45	8.69118	1429.33	7.26642	1438.07	12.5704	1438.07	12.5704	98.9834
12RKB2862-84	446.58	28000.6	1.68498	13.8794	0.85027	1.42964	1.51985	0.143911	1.25976	0.828869	866.743	10.2167	901.4	9.08089	987.349	17.2888	987.349	17.2888	87.7848
12RKB2862-85	199.244	23791	8.23388	16.3166	2.72919	0.90155	3.00615	0.106689	1.26034	0.419255	653.488	7.83248	652.555	14.4728	649.334	58.6246	653.488	7.83248	100.64
12RKB2862-86	95.1158	57318.9	2.02704	13.1922	3.50415	1.87684	3.67652	0.179574	1.11256	0.302612	1064.65	10.9184	1072.95	24.3592	1089.85	70.2272	1089.85	70.2272	97.6879
12RKB2862-87	158.258	31705.1	2.18776	17.0634	3.57891	0.620265	5.28681	0.0767611	3.89125	0.736029	476.761	17.8826	490.013	20.5529	552.456	78.1337	476.761	17.8826	86.2984
12RKB2862-88	65.5238	18003.1	1.50539	15.9425	6.66395	0.885004	7.0129	0.102329	2.18461	0.311513	628.044	13.0731	643.682	33.4439	698.931	142.08	628.044	13.0731	89.8577
12RKB2862-89	322.124	43878.8	4.21483	13.3986	1.17028	1.77436	4.07849	0.172425	3.90698	0.957948	1025.46	37.0407	1036.12	26.4915	1058.69	23.5624	1058.69	23.5624	96.8608
12RKB2862-90	208.987	64336.8	2.81804	16.6404	1.8676	0.813551	3.50914	0.0981852	2.97088	0.846612	603.765	17.1228	604.444	15.9853	606.971	40.3908	603.765	17.1228	99.4717
12RKB2862-91	241.065	137753	1.49973	9.86316	0.274947	4.06654	0.93864	0.290897	0.897468	0.956137	1646.01	13.0372	1647.62	7.64981	1649.65	5.09793	1649.65	5.09793	99.7792
12RKB2862-92	191.464	130989	1.5861	14.1885	1.34441	1.38169	2.62415	0.142182	2.25361	0.858795	856.988	18.0845	881.159	15.4589	942.347	27.5383	942.347	27.5383	90.9419
12RKB2862-93	273.159	160337	6.77555	9.44786	0.406922	4.19164	1.24519	0.287221	1.17682	0.945095	1627.63	16.9275	1672.39	10.2084	1729.01	7.46946	1729.01	7.46946	94.1366
12RKB2862-94	307.073	29040.3	0.684404	9.75142	0.583054	4.09097	1.26193	0.28933	1.11916	0.886863	1638.18	16.1898	1652.5	10.2969	1670.75	10.78	1670.75	10.78	98.0506
12RKB2862-95	566.88	123431	0.702762	5.53099	0.538596	10.4912	5.01579	0.420851	4.98679	0.994218	2264.34	95.2249	2479.14	46.53	2660.2	8.92751	2660.2	8.92751	85.119
12RKB2862-96	211.645	26685.5	1.1898	17.3133	4.22022	0.676009	4.83713	0.0848852	2.3638	0.488679	525.217	11.9228	524.36	19.8129	520.609	92.6436	525.217	11.9228	100.885
12RKB2862-97	269.975	46555.2	0.576991	13.8889	1.73583	1.395	4.97326	0.14052	4.6605	0.937111	847.603	37.0162	886.817	29.4213	985.956	35.3176	985.956	35.3176	85.9676
12RKB2862-98	36.4222	20538	23.8729	13.8222	5.6269	1.73703	6.24891	0.174135	2.71788	0.434936	1034.85	25.9847	1022.36	40.2893	995.741	114.414	995.741	114.414	103.928
12RKB2862-99	64.666	5239.32	1.1495	16.9384	11.2759	0.444204	11.4127	0.0545697	1.76166	0.15436	342.516	5.87648	373.212	35.6573	568.504	246.135	342.516	5.87648	NA
12RKB2862-100	251.333	113031	8.331	12.7186	1.03334	2.14384	2.74305	0.197757	2.54098	0.926331	1163.26	27.0448	1163.07	18.9953	1162.69	20.4926	1162.69	20.4926	100.049
17d--Sumner Group Group, Rebecca K. Bounds Core, Depth 2602 ft. ( 38.48963, -101.97456)
RKB2602-1	214.522	116727	2.41148	13.7525	0.626829	1.70781	2.37228	0.170342	2.28797	0.964459	1013.99	21.4673	1011.46	15.1932	1005.97	12.7083	1005.97	12.7083	100.798
RKB2602-2	203.936	129632	2.46846	17.1753	2.23003	0.708456	2.49167	0.0882505	1.11148	0.44608	545.182	5.81045	543.829	10.4917	538.179	48.7929	545.182	5.81045	101.301
RKB2602-3	84.4134	114572	1.44039	9.89871	0.485891	4.15457	0.942728	0.298266	0.807865	0.856944	1682.7	11.9646	1665.11	7.7154	1642.98	9.0169	1642.98	9.0169	102.418
RKB2602-4	254.503	156083	1.50252	14.1169	0.703726	1.53904	1.05107	0.157575	0.780714	0.742781	943.287	6.85091	946.118	6.46914	952.714	14.404	952.714	14.404	99.0105
RKB2602-5	129.515	20894.7	0.645387	15.4918	4.91454	0.946615	5.24141	0.106359	1.82199	0.347615	651.566	11.2912	676.338	25.886	759.696	103.71	651.566	11.2912	85.7666
RKB2602-6	384.968	491265	0.700545	11.1371	0.440246	3.05849	0.888801	0.247047	0.772108	0.868707	1423.23	9.86036	1422.36	6.80117	1421.04	8.41299	1421.04	8.41299	100.154
RKB2602-7	174.212	51720	1.22665	18.2955	3.55931	0.519472	3.64157	0.0689294	0.769665	0.211355	429.702	3.19945	424.798	12.6419	398.25	79.7751	429.702	3.19945	107.898
RKB2602-8	100.285	105989	0.97849	9.75826	0.738682	4.15206	1.24063	0.293857	0.996756	0.803424	1660.77	14.5934	1664.62	10.1525	1669.45	13.6602	1669.45	13.6602	99.4801
RKB2602-10	155.381	158230	1.42293	7.44612	0.314968	7.45485	1.48438	0.402594	1.45058	0.977229	2180.97	26.841	2167.58	13.2903	2154.9	5.49844	2154.9	5.49844	101.21
RKB2602-11	155.338	149112	2.20145	10.7141	0.395202	3.34206	2.30883	0.259699	2.27475	0.985241	1488.3	30.2314	1490.94	18.0462	1494.67	7.47772	1494.67	7.47772	99.574
RKB2602-12	174.758	29256.3	1.3306	16.8585	2.43178	0.79557	4.55094	0.097274	3.84674	0.845264	598.414	21.9834	594.327	20.477	578.755	52.8454	598.414	21.9834	103.397
RKB2602-15	141.928	17621.9	3.92501	16.2622	2.01857	0.934448	3.11778	0.110213	2.37611	0.762118	673.984	15.2059	669.972	15.2935	656.522	43.2987	673.984	15.2059	102.66
RKB2602-16	228.013	78499	0.897748	16.4841	1.95659	0.847369	2.85714	0.101306	2.08207	0.728726	622.059	12.3465	623.204	13.3078	627.34	42.1671	622.059	12.3465	99.1582
RKB2602-17	292.199	138542	4.04255	13.189	0.272906	1.93507	0.792385	0.185101	0.743906	0.938819	1094.78	7.49013	1093.3	5.30455	1090.32	5.46027	1090.32	5.46027	100.409
RKB2602-19	110.974	10482.2	2.24966	13.3846	1.79697	1.64014	4.03771	0.159216	3.6158	0.895507	952.419	32.0146	985.768	25.4748	1060.8	36.1719	1060.8	36.1719	89.7832
RKB2602-20	173.387	325872	2.95675	9.09748	0.494298	4.98318	0.897468	0.328796	0.749079	0.834658	1832.54	11.9485	1816.47	7.58982	1798.07	8.99596	1798.07	8.99596	101.917
RKB2602-21	277.243	70187	1.14353	17.0783	1.12328	0.72734	2.0417	0.090091	1.70493	0.835054	556.075	9.08331	554.991	8.72956	550.523	24.5241	556.075	9.08331	101.009
RKB2602-22	468.592	27998.7	0.878732	14.7898	0.557887	1.29185	2.41188	0.138571	2.34647	0.972881	836.576	18.4097	842.117	13.8051	856.735	11.584	836.576	18.4097	97.6469
RKB2602-23	695.221	131551	1.27163	16.9799	0.471738	0.757893	0.793179	0.0933344	0.637649	0.803915	575.227	3.50904	572.794	3.47231	563.129	10.2782	575.227	3.50904	102.148
RKB2602-24	128.098	96913.2	0.92227	10.7188	0.620862	3.31616	2.13492	0.257798	2.04264	0.95678	1478.57	26.9887	1484.86	16.6566	1493.85	11.7488	1493.85	11.7488	98.9772
RKB2602-25	248.36	5862.09	1.47167	17.392	4.37834	0.612352	4.42979	0.0772413	0.673168	0.151964	479.635	3.11156	485.042	17.0842	510.682	96.2804	479.635	3.11156	93.9206
RKB2602-26	110.857	186313	1.87881	5.56701	0.278309	12.0088	1.42578	0.484866	1.39835	0.980764	2548.42	29.4355	2605.1	13.365	2649.44	4.61788	2649.44	4.61788	96.1874
RKB2602-27	73.8668	46119.3	1.78057	13.5723	1.95746	1.78414	2.16787	0.175623	0.931684	0.429769	1043.02	8.97224	1039.69	14.1068	1032.68	39.5731	1032.68	39.5731	101.001
RKB2602-28	633.245	137850	1.25112	17.801	0.506367	0.561717	1.55998	0.0725206	1.47551	0.945852	451.323	6.43155	452.644	5.6973	459.362	11.2499	451.323	6.43155	98.2501
RKB2602-29	172.04	217862	2.26953	6.22194	2.38145	9.51699	3.19102	0.429462	2.12397	0.66561	2303.29	41.1363	2389.19	29.3284	2463.25	40.2409	2463.25	40.2409	93.506
RKB2602-30	123.203	135665	1.32481	13.9225	1.36884	1.62034	1.59406	0.163615	0.816892	0.512459	976.834	7.40451	978.122	10.0092	981.035	27.8668	981.035	27.8668	99.5718
RKB2602-31	45.9309	71078.1	1.1282	5.36595	0.432755	12.8757	1.14947	0.501092	1.0649	0.926424	2618.49	22.916	2670.6	10.8308	2710.29	7.1394	2710.29	7.1394	96.6128
RKB2602-32	108.412	76859.4	3.00235	13.2043	0.832289	1.96368	2.13618	0.188056	1.96737	0.920977	1110.83	20.075	1103.15	14.3726	1088.04	16.6726	1088.04	16.6726	102.095
RKB2602-33	380.856	78751.2	1.78486	9.45341	0.272717	4.16936	2.89155	0.285862	2.87866	0.995542	1620.82	41.255	1668.02	23.6849	1727.93	5.00667	1727.93	5.00667	93.8011
RKB2602-34	630.068	64785.6	1.58552	19.0607	1.77995	0.330205	1.86925	0.0456481	0.570859	0.305395	287.748	1.60651	289.723	4.71158	305.659	40.5492	287.748	1.60651	NA
RKB2602-35	35.2044	40681.6	1.17438	14.4625	4.5814	1.33244	4.69109	0.139762	1.0085	0.214981	843.316	7.972	859.942	27.2172	903.031	94.4892	843.316	7.972	93.3873
RKB2602-36	54.6512	249048	1.43103	4.97176	0.387044	15.5086	1.89407	0.559219	1.8541	0.978899	2863.4	42.8679	2847.02	18.069	2835.42	6.30908	2835.42	6.30908	100.987
RKB2602-37	288.739	53575.5	1.56386	13.5282	0.74344	1.48879	1.72896	0.146074	1.56096	0.902833	878.918	12.8254	925.824	10.5021	1039.26	15.0268	1039.26	15.0268	84.5717
RKB2602-38	291.971	157540	1.65742	17.156	1.27974	0.635672	2.80585	0.0790946	2.49701	0.88993	490.716	11.7985	499.623	11.0725	540.629	27.9879	490.716	11.7985	90.7677
RKB2602-40	75.8077	25671.7	1.10844	14.2911	2.05593	1.39326	2.8757	0.14441	2.01068	0.699194	869.55	16.356	886.08	17.0003	927.558	42.2166	869.55	16.356	93.7462
RKB2602-41	199.722	54305.3	1.38743	17.8161	2.91724	0.551776	3.03532	0.0712973	0.838393	0.276212	443.967	3.5969	446.159	10.9594	457.501	64.7256	443.967	3.5969	97.0417
RKB2602-42	61.0543	66257.2	2.87432	10.7432	1.52936	3.22007	2.13849	0.250899	1.49472	0.698962	1443.11	19.3267	1462	16.5699	1489.53	28.9573	1489.53	28.9573	96.8835
RKB2602-43	151.167	83401.8	0.790345	16.9644	1.37929	0.790192	1.79519	0.0972233	1.14904	0.640063	598.116	6.56338	591.281	8.04606	565.113	30.053	598.116	6.56338	105.84
RKB2602-44	52.4614	94334.6	2.06952	10.6216	2.31312	3.2956	2.78622	0.253878	1.55322	0.557466	1458.44	20.2732	1480.01	21.7081	1511.06	43.6759	1511.06	43.6759	96.518
RKB2602-46	150.524	121817	1.64997	9.92318	0.494677	4.00836	1.21224	0.28848	1.10671	0.912951	1633.93	15.9732	1635.89	9.85148	1638.4	9.18536	1638.4	9.18536	99.7274
RKB2602-47	234.409	171767	15.0527	8.99148	0.292412	4.95293	0.836094	0.322992	0.783293	0.936848	1804.33	12.3276	1811.33	7.06356	1819.37	5.30601	1819.37	5.30601	99.1731
RKB2602-48	80.6556	45844.7	0.719454	16.102	2.40909	0.870468	3.22621	0.101656	2.14586	0.665132	624.106	12.7646	635.822	15.2461	677.687	51.5167	624.106	12.7646	92.0936
RKB2602-50	561.593	10376.1	1.66101	16.8499	0.970047	0.625582	6.18974	0.0764504	6.11325	0.987643	474.901	27.9885	493.34	24.1913	579.849	21.0738	474.901	27.9885	81.9008
RKB2602-51	90.4143	241010	0.566726	5.35412	0.15977	13.5341	0.676622	0.525553	0.657488	0.971722	2722.69	14.6015	2717.67	6.39769	2713.93	2.6349	2713.93	2.6349	100.323
RKB2602-52	231.235	37268.2	1.4091	16.4558	1.11084	0.834808	2.32578	0.0996333	2.04336	0.878567	612.26	11.9349	616.276	10.7451	631.08	23.9265	612.26	11.9349	97.0177
RKB2602-53	236.579	90117.9	1.22802	9.47459	0.32168	4.42245	0.952589	0.303894	0.896631	0.941257	1710.59	13.4714	1716.55	7.88881	1723.82	5.90861	1723.82	5.90861	99.2324
RKB2602-55	149.328	139581	2.24656	12.8789	0.719365	2.10367	0.935369	0.196497	0.597854	0.639163	1156.47	6.32932	1150.01	6.43755	1137.86	14.3025	1137.86	14.3025	101.636
RKB2602-55B	75.9983	118810	1.1815	9.76373	0.812264	4.26184	0.976026	0.301794	0.54116	0.554452	1700.2	8.08747	1686.02	8.02712	1668.42	15.0231	1668.42	15.0231	101.905
RKB2602-56	47.443	132382	0.942758	7.70765	0.735927	6.87615	0.912327	0.384385	0.539215	0.591032	2096.73	9.65138	2095.59	8.08763	2094.45	12.9342	2094.45	12.9342	100.109
RKB2602-57	138.955	118193	0.920533	8.49368	0.584323	5.51611	0.882898	0.339803	0.661872	0.749659	1885.72	10.8213	1903.11	7.58915	1922.11	10.4743	1922.11	10.4743	98.1072
RKB2602-58	250.977	43855.3	2.14595	7.18652	0.280509	7.88389	3.43503	0.410921	3.42356	0.99666	2219.13	64.2785	2217.84	30.9623	2216.64	4.86373	2216.64	4.86373	100.112
RKB2602-59	126.929	126930	1.86201	11.3261	2.3647	2.96611	8.22947	0.243649	7.88241	0.957827	1405.64	99.5585	1398.98	62.5711	1388.83	45.3944	1388.83	45.3944	101.21
RKB2602-60	374.841	41209	2.06462	12.8279	0.64213	2.00755	4.64032	0.186775	4.59567	0.990379	1103.88	46.6258	1118.07	31.4608	1145.75	12.7434	1145.75	12.7434	96.3457
RKB2602-61	169.375	117894	0.606691	12.0434	0.72071	2.42793	0.873952	0.212073	0.494337	0.565634	1239.85	5.57568	1250.91	6.28532	1269.99	14.0487	1269.99	14.0487	97.6266
RKB2602-63	393.283	34757.1	0.933605	19.1082	1.63228	0.341493	2.59992	0.0473261	2.02367	0.778358	298.084	5.89489	298.302	6.72031	299.99	37.2345	298.084	5.89489	NA
RKB2602-64	50.3847	54630.1	1.34888	12.6663	2.74868	2.16744	2.95151	0.199111	1.07526	0.364308	1170.54	11.5098	1170.66	20.5103	1170.89	54.4068	1170.89	54.4068	99.9701
RKB2602-65	378.812	131863	2.14991	12.8257	0.537287	2.09854	2.75159	0.195208	2.69862	0.980751	1149.53	28.413	1148.33	18.9245	1146.09	10.6763	1146.09	10.6763	100.3
RKB2602-66	260.582	138664	3.00341	16.6322	1.45714	0.831112	1.65004	0.100256	0.774182	0.469191	615.906	4.54754	614.229	7.6046	608.03	31.5286	615.906	4.54754	101.295
RKB2602-67	228.441	24530.6	0.869856	13.1206	1.20394	1.89406	1.29418	0.180238	0.474795	0.36687	1068.28	4.67414	1079.01	8.60046	1100.73	24.0783	1100.73	24.0783	97.0514
RKB2602-68	164.862	201240	2.2248	11.3656	0.605305	2.89853	1.05907	0.238928	0.869041	0.820571	1381.12	10.8039	1381.53	7.99539	1382.14	11.6287	1382.14	11.6287	99.9264
RKB2602-69	51.8624	30089.8	0.862102	16.5848	5.28375	0.823728	6.37803	0.0990813	3.57229	0.560093	609.023	20.76	610.126	29.259	614.204	114.199	609.023	20.76	99.1565
RKB2602-70	188.591	62509.1	2.08897	17.0535	1.68751	0.703774	2.3043	0.0870452	1.56911	0.680948	538.039	8.09971	541.043	9.66505	553.73	36.8256	538.039	8.09971	97.1663
RKB2602-72	167.143	10922.7	1.19626	19.0852	3.37311	0.390626	4.29516	0.05407	2.65906	0.619082	339.461	8.79292	334.826	12.2513	302.764	76.8982	339.461	8.79292	NA
RKB2602-73	58.81	40609.4	0.692113	10.34	0.940565	3.36352	1.77955	0.25224	1.51067	0.848907	1450.02	19.6163	1495.94	13.9291	1561.62	17.6384	1561.62	17.6384	92.8533
RKB2602-75	294.556	75020.9	10.6169	17.3189	1.07524	0.648524	1.26624	0.08146	0.668742	0.528132	504.831	3.24721	507.57	5.05802	519.906	23.5995	504.831	3.24721	97.1006
RKB2602-76	243.213	53061.1	1.21323	18.3052	2.25229	0.513322	2.65076	0.0681495	1.39775	0.5273	424.997	5.7488	420.681	9.12999	397.063	50.4766	424.997	5.7488	107.035
RKB2602-77	71.8765	34328.4	0.805376	18.1798	10.8801	0.667099	11.3289	0.0879586	3.15706	0.278673	543.452	16.4539	518.947	46.0622	412.449	243.91	543.452	16.4539	131.762
RKB2602-78	166.424	180543	2.02432	11.5147	0.579798	2.80548	0.980056	0.234293	0.790155	0.806234	1356.96	9.66879	1357	7.33645	1357.04	11.1782	1357.04	11.1782	99.9939
RKB2602-79	121.135	167754	2.7629	10.6357	0.479539	3.31313	0.969857	0.255566	0.843009	0.86921	1467.12	11.0615	1484.15	7.5647	1508.56	9.05671	1508.56	9.05671	97.2528
RKB2602-80	170.058	173253	2.36461	8.37785	1.11182	5.66778	1.82415	0.344385	1.44616	0.792786	1907.73	23.8812	1926.47	15.7455	1946.68	19.8725	1946.68	19.8725	97.999
RKB2602-81	127.084	119509	1.34719	9.92198	0.957581	3.94253	2.00075	0.283708	1.75671	0.878026	1610.01	25.028	1622.46	16.2063	1638.62	17.7805	1638.62	17.7805	98.254
RKB2602-82	808.869	19118.3	1.38033	18.7042	1.07715	0.390776	2.4058	0.053011	2.15118	0.894167	332.981	6.98118	334.936	6.86382	348.555	24.3396	332.981	6.98118	NA
RKB2602-83	111.106	9534.33	0.950701	10.5664	1.02074	2.95717	2.31915	0.226623	2.08244	0.897932	1316.78	24.8019	1396.69	17.5992	1520.89	19.2453	1520.89	19.2453	86.5795
RKB2602-84	132.684	44589.4	3.73156	16.783	3.1903	0.766596	3.65266	0.0933115	1.77872	0.486967	575.092	9.78629	577.808	16.0955	588.509	69.2364	575.092	9.78629	97.7202
RKB2602-85	61.4819	17182.7	1.44942	10.0543	1.27609	3.47233	5.82034	0.253205	5.67873	0.975669	1454.98	73.967	1520.95	45.9157	1613.99	23.7688	1613.99	23.7688	90.1482
RKB2602-86	243.44	136880	4.09902	17.3753	1.3356	0.69584	1.49049	0.0876879	0.66162	0.443893	541.848	3.43845	536.303	6.20998	512.797	29.3464	541.848	3.43845	105.665
RKB2602-87	98.5367	195631	0.568995	5.40462	0.342108	13.312	0.909408	0.521804	0.842606	0.926544	2706.83	18.6249	2702.04	8.58899	2698.44	5.65029	2698.44	5.65029	100.311
RKB2602-88	542.331	29830.5	1.47946	11.7908	0.364154	2.47459	5.26448	0.211614	5.25187	0.997605	1237.41	59.1324	1264.64	38.0881	1311.23	7.06562	1311.23	7.06562	94.3708
RKB2602-89	438.983	142343	2.18061	13.549	0.464104	1.75112	2.0546	0.172077	2.0015	0.974154	1023.54	18.9427	1027.58	13.2797	1036.15	9.39372	1036.15	9.39372	98.7832
RKB2602-90	405.449	104576	1.18215	16.517	0.586072	0.836856	2.58503	0.100249	2.51771	0.97396	615.867	14.7882	617.409	11.9589	623.046	12.661	615.867	14.7882	98.8479
RKB2602-91	36.0771	24047.2	0.620574	13.7067	6.09594	1.61298	6.42554	0.160347	2.03151	0.316162	958.703	18.0972	975.265	40.2958	1012.74	123.683	1012.74	123.683	94.6645
RKB2602-92	242.27	112620	1.41091	12.8366	0.994767	2.14112	2.37769	0.199338	2.15959	0.908274	1171.76	23.1388	1162.19	16.4581	1144.36	19.7628	1144.36	19.7628	102.395
RKB2602-93	40.3871	32257.6	1.11808	12.9687	3.38254	1.96344	3.4917	0.184677	0.866246	0.248087	1092.47	8.70506	1103.06	23.4945	1123.99	67.4453	1123.99	67.4453	97.1963
RKB2602-94	85.0917	99882.6	1.8344	7.5306	0.530307	7.29401	1.05225	0.398377	0.908844	0.863717	2161.56	16.6908	2148.08	9.3964	2135.19	9.27782	2135.19	9.27782	101.235
RKB2602-95	133.311	42700	0.902592	17.0106	1.81042	0.759231	2.06381	0.0936683	0.990807	0.480085	577.196	5.47034	573.567	9.04406	559.233	39.4884	577.196	5.47034	103.212
RKB2602-96	125.439	48481.1	1.82371	13.5308	1.11068	1.83731	4.84486	0.180304	4.71583	0.973368	1068.64	46.4404	1058.9	31.8662	1038.87	22.4441	1038.87	22.4441	102.866
RKB2602-97	263.865	19886	1.93408	11.407	1.06525	2.37049	4.27916	0.196114	4.14444	0.968519	1154.41	43.8053	1233.75	30.5678	1375.14	20.4862	1375.14	20.4862	83.9482
RKB2602-98	78.9929	24655	1.57528	16.7196	4.00268	0.829466	4.14845	0.100583	1.09006	0.262762	617.824	6.42197	613.316	19.1003	596.685	86.761	617.824	6.42197	103.543
RKB2602-99	86.2695	69847.8	3.28249	13.567	1.76083	1.80332	1.94842	0.177442	0.834163	0.428122	1052.98	8.10375	1046.66	12.7273	1033.47	35.5993	1033.47	35.5993	101.888
RKB2602-100	171.582	58461	1.37174	17.8999	2.80782	0.551117	3.17603	0.0715472	1.48434	0.467358	445.47	6.38901	445.728	11.4586	447.039	62.4215	445.47	6.38901	99.649
RKB2602-102	336.965	32816.1	1.04403	14.3038	0.462766	1.28387	1.91881	0.133189	1.86217	0.970482	806.034	14.1093	838.574	10.9529	925.767	9.50624	806.034	14.1093	87.0666
RKB2602-103	1082.88	63268.9	2.81473	12.098	0.238312	2.28813	0.742802	0.200767	0.703535	0.947137	1179.44	7.58294	1208.63	5.24854	1261.18	4.63882	1261.18	4.63882	93.5188
17e--Harper Sandstone Rebecca K. Bounds Core, Depth 2490 ft. ( 38.48963, -101.97456)
RKB-HPR-1-Spot 60	241.39	104769	1.74732	19.1011	2.03351	0.300298	2.22909	0.0416016	0.913079	0.409619	262.753	2.3509	266.633	5.22723	300.878	46.359	262.753	2.3509	NA
RKB-HPR-1-Spot 85	614.097	96050.3	3.53479	18.7803	1.14125	0.38556	1.76744	0.0525162	1.34959	0.763583	329.951	4.34094	331.121	4.99395	339.372	25.8389	329.951	4.34094	NA
RKB-HPR-1-Spot 8	64.877	97671.3	2.76297	18.4225	2.90662	0.417214	3.22931	0.055745	1.40712	0.435734	349.696	4.78956	354.057	9.65329	382.726	65.3358	349.696	4.78956	NA
RKB-HPR-1-Spot 50	244.23	56755.3	1.37408	18.2214	2.09479	0.449756	2.38335	0.059437	1.13676	0.47696	372.201	4.11121	377.109	7.50772	407.342	46.8897	372.201	4.11121	NA
RKB-HPR-1-Spot 62	125.915	53382.6	2.74112	18.1602	2.00975	0.466058	2.34743	0.0613846	1.21298	0.516727	384.041	4.5223	388.463	7.57739	414.86	44.9308	384.041	4.5223	NA
RKB-HPR-1-Spot 79	392.058	52240.5	2.2443	17.5366	1.95633	0.491064	2.32287	0.0624571	1.2524	0.539162	390.551	4.74606	405.635	7.76793	492.446	43.1399	390.551	4.74606	NA
RKB-HPR-1-Spot 104	98.5177	117096	0.852098	17.5674	2.39577	0.527291	2.62505	0.0671824	1.07293	0.408726	419.158	4.35417	430.01	9.20255	488.575	52.8671	419.158	4.35417	85.7919
RKB-HPR-1-Spot 105	179.251	44313.4	2.15086	18.0886	1.43435	0.514855	1.83489	0.0675442	1.14433	0.623648	421.343	4.66736	421.708	6.33228	423.684	32.0211	421.343	4.66736	99.4475
RKB-HPR-1-Spot 14	83.9099	20344.1	1.38699	17.9668	2.5626	0.519249	2.82084	0.0676621	1.17909	0.417993	422.055	4.81701	424.65	9.7897	438.739	57.0468	422.055	4.81701	96.1973
RKB-HPR-1-Spot 111	333.126	68423.2	1.40115	18.0376	1.36361	0.528191	1.73969	0.0690986	1.08031	0.62098	430.723	4.5011	430.608	6.10548	429.974	30.3947	430.723	4.5011	100.174
RKB-HPR-1-Spot 49	68.3635	43094.6	0.954084	18.0219	2.43034	0.531118	2.76503	0.0694209	1.31864	0.476901	432.666	5.51808	432.551	9.73923	431.92	54.1804	432.666	5.51808	100.173
RKB-HPR-1-Spot 82	329.916	75172.9	0.389025	17.9615	1.05346	0.536696	1.35042	0.0699149	0.844904	0.62566	435.643	3.55915	436.244	4.78897	439.396	23.4637	435.643	3.55915	99.1458
RKB-HPR-1-Spot 22	130.451	166589	1.51629	17.6912	1.61671	0.547434	2.06781	0.0702406	1.28922	0.623473	437.605	5.45449	443.314	7.42794	473.073	35.7776	437.605	5.45449	92.5028
RKB-HPR-1-Spot 48	273.241	50568.5	1.66075	17.8138	1.17496	0.552549	1.74502	0.0713883	1.29018	0.739351	444.514	5.54179	446.665	6.30611	457.735	26.0849	444.514	5.54179	97.1117
RKB-HPR-1-Spot 109	143.927	44398.6	1.4072	17.4834	2.29907	0.574093	2.65269	0.0727961	1.32327	0.49884	452.979	5.78837	460.658	9.82385	499.116	50.6526	452.979	5.78837	90.7562
RKB-HPR-1-Spot 6	488.699	123229	1.55292	17.8683	1.06066	0.575088	1.37834	0.0745276	0.880237	0.638621	463.376	3.93566	461.3	5.10999	450.956	23.5712	463.376	3.93566	102.754
RKB-HPR-1-Spot 100	219.473	114486	1.68532	17.5248	1.88318	0.599626	2.18042	0.0762134	1.09903	0.504045	473.481	5.0172	476.996	8.29931	493.933	41.5261	473.481	5.0172	95.8595
RKB-HPR-1-Spot 47	310.575	52146.8	1.30661	17.2354	1.30491	0.624315	1.78261	0.0780409	1.21445	0.681278	484.419	5.66744	492.548	6.95707	530.549	28.6081	484.419	5.66744	91.3052
RKB-HPR-1-Spot 112	484.276	61010.3	3.6246	17.3368	1.16378	0.623106	1.81438	0.0783483	1.39197	0.767188	486.257	6.51958	491.792	7.07263	517.637	25.5514	486.257	6.51958	93.9378
RKB-HPR-1-Spot 98	612.803	113015	0.803989	17.5551	0.857199	0.62214	1.45368	0.079212	1.17405	0.80764	491.418	5.55506	491.188	5.66112	490.136	18.9276	491.418	5.55506	100.262
RKB-HPR-1-Spot 17	235.249	229354	1.6701	17.5584	1.44774	0.626899	1.84994	0.0798328	1.15166	0.622541	495.125	5.48868	494.162	7.2382	489.707	31.9242	495.125	5.48868	101.106
RKB-HPR-1-Spot 23	53.5064	40602.9	0.760884	17.0517	2.9735	0.723859	3.24893	0.0895199	1.30914	0.402945	552.697	6.93406	552.942	13.8532	553.949	64.8744	552.697	6.93406	99.774
RKB-HPR-1-Spot 42	254.934	109399	0.932883	17.024	0.964155	0.730949	1.32628	0.0902501	0.910732	0.68668	557.016	4.85993	557.11	5.68688	557.475	21.0046	557.016	4.85993	99.9177
RKB-HPR-1-Spot 13	298.878	124631	1.47956	16.8592	1.26137	0.774757	1.64381	0.0947328	1.05407	0.641235	583.467	5.88003	582.488	7.28644	578.694	27.4023	583.467	5.88003	100.825
RKB-HPR-1-Spot 51	461.204	71042.7	2.05894	16.3569	0.970303	0.807945	1.49663	0.0958474	1.13948	0.761364	590.027	6.42474	601.301	6.79122	644.058	20.875	590.027	6.42474	91.6108
RKB-HPR-1-Spot 37	75.5057	38778.2	2.45563	16.5522	1.47601	0.808286	1.72766	0.0970329	0.897879	0.519709	596.997	5.1196	601.492	7.8414	618.45	31.8679	596.997	5.1196	96.5313
RKB-HPR-1-Spot 97	382.383	83944.5	2.00773	16.7832	1.08458	0.803391	1.42337	0.0977911	0.921778	0.647601	601.451	5.29327	598.74	6.4386	588.496	23.5277	601.451	5.29327	102.201
RKB-HPR-1-Spot 2	164.354	99157.9	2.13986	16.4932	1.42764	0.825127	1.76814	0.0987019	1.04315	0.589969	606.797	6.04103	610.905	8.11679	626.145	30.7766	606.797	6.04103	96.91
RKB-HPR-1-Spot 33	131.245	35654.7	1.1285	16.3985	1.52415	0.834623	1.91197	0.0992645	1.15438	0.603766	610.097	6.71984	616.174	8.83213	638.589	32.7894	610.097	6.71984	95.5383
RKB-HPR-1-Spot 95	106.457	32651.9	1.49722	16.6118	1.62044	0.827726	1.81761	0.0997244	0.823335	0.452977	612.794	4.81297	612.35	8.35827	610.687	35.0437	612.794	4.81297	100.345
RKB-HPR-1-Spot 64	129.617	57970.8	0.589006	16.3764	1.38672	0.843743	1.81608	0.100214	1.17267	0.645717	615.66	6.88566	621.209	8.43888	641.495	29.8177	615.66	6.88566	95.9728
RKB-HPR-1-Spot 94	157.508	40769	1.38481	16.4558	1.45851	0.841345	2.16198	0.100414	1.5959	0.738165	616.833	9.38771	619.888	10.0308	631.078	31.4034	616.833	9.38771	97.7427
RKB-HPR-1-Spot 19	191.601	71318.7	1.29641	16.1387	1.15277	0.86817	1.54758	0.101618	1.03254	0.667197	623.885	6.13997	634.573	7.30263	672.81	24.6553	623.885	6.13997	92.7283
RKB-HPR-1-Spot 5	126.695	107759	2.20797	14.9769	1.37569	1.18492	1.79428	0.128709	1.15191	0.641992	780.495	8.46768	793.601	9.88068	830.576	28.6856	780.495	8.46768	93.9703
RKB-HPR-1-Spot 52	226.996	115562	4.98197	15.1186	1.09109	1.19753	1.53256	0.13131	1.07623	0.702243	795.333	8.05265	799.446	8.48026	810.946	22.8414	795.333	8.05265	98.0747
RKB-HPR-1-Spot 4	160.202	73914	1.29516	14.7967	1.29908	1.31497	1.61281	0.141117	0.955788	0.592624	850.975	7.61954	852.307	9.30239	855.778	27.001	850.975	7.61954	99.4388
RKB-HPR-1-Spot 70	67.1883	30487.8	2.39415	14.0926	1.67514	1.60848	2.13048	0.164401	1.31637	0.617874	981.188	11.9811	973.517	13.3401	956.226	34.2499	956.226	34.2499	102.611
RKB-HPR-1-Spot 24	82.6309	95024.9	1.48315	14.0007	1.52809	1.47465	1.95549	0.149739	1.22021	0.623989	899.501	10.2444	920.036	11.8326	969.613	31.179	969.613	31.179	92.7691
RKB-HPR-1-Spot 118	105.281	231692	1.52969	13.9338	0.830712	1.55786	1.42691	0.157433	1.16017	0.813064	942.497	10.1728	953.617	8.82449	979.345	16.9167	979.345	16.9167	96.2375
RKB-HPR-1-Spot 28	58.5042	184853	2.05237	13.7918	2.11326	1.57154	2.50325	0.157197	1.34177	0.536013	941.178	11.7499	959.032	15.5346	1000.19	42.9199	1000.19	42.9199	94.1004
RKB-HPR-1-Spot 107	57.4143	55823.9	0.798271	13.6135	1.59791	1.70051	1.9865	0.167899	1.18019	0.594105	1000.52	10.9374	1008.72	12.7021	1026.55	32.3222	1026.55	32.3222	97.4649
RKB-HPR-1-Spot 117	40.8701	38615.8	2.86584	13.5329	1.85945	1.72073	2.11774	0.168889	1.01355	0.478598	1005.99	9.4404	1016.3	13.6005	1038.55	37.5638	1038.55	37.5638	96.8643
RKB-HPR-1-Spot 76	244.805	6.72018e+06	1.26375	13.5206	1.02034	1.77621	1.42043	0.174177	0.988193	0.695702	1035.08	9.44968	1036.79	9.22789	1040.38	20.6133	1040.38	20.6133	99.4905
RKB-HPR-1-Spot 20	72.4855	131728	0.609796	13.4402	1.55073	1.59137	1.83205	0.155123	0.975523	0.532476	929.615	8.44506	966.836	11.4243	1052.46	31.246	1052.46	31.246	88.3275
RKB-HPR-1-Spot 61	74.5456	187329	2.79171	13.4225	1.47418	1.83992	1.90776	0.179114	1.21093	0.634737	1062.13	11.858	1059.83	12.5507	1055.11	29.7104	1055.11	29.7104	100.666
RKB-HPR-1-Spot 74	102.278	55563.4	1.61355	13.4107	1.29698	1.85696	1.75115	0.180614	1.1766	0.6719	1070.33	11.6036	1065.9	11.5577	1056.88	26.1148	1056.88	26.1148	101.272
RKB-HPR-1-Spot 99	202.534	87255.8	3.06332	13.4096	0.988081	1.80424	1.5269	0.175472	1.1641	0.762392	1042.19	11.2022	1046.99	9.97548	1057.05	19.9136	1057.05	19.9136	98.5948
RKB-HPR-1-Spot 80	527.716	109967	5.83673	13.3687	0.747567	1.88421	1.81989	0.18269	1.65926	0.911736	1081.66	16.5225	1075.55	12.0725	1063.2	15.0377	1063.2	15.0377	101.736
RKB-HPR-1-Spot 93	756.138	380216	2.75754	13.3566	0.946446	1.85188	1.59339	0.179394	1.28185	0.804478	1063.66	12.5691	1064.1	10.5063	1065.01	19.0137	1065.01	19.0137	99.8733
RKB-HPR-1-Spot 65	94.852	70003.5	1.52363	13.3439	1.21257	1.92086	1.7926	0.185899	1.32026	0.736506	1099.12	13.3416	1088.37	11.9706	1066.93	24.3792	1066.93	24.3792	103.018
RKB-HPR-1-Spot 26	64.8826	40463.3	1.54637	13.3345	1.55761	1.8234	1.96622	0.176343	1.19996	0.610284	1046.96	11.596	1053.91	12.8943	1068.35	31.3205	1068.35	31.3205	97.9986
RKB-HPR-1-Spot 59	63.3457	132353	3.42902	13.2476	1.38505	1.81353	1.84691	0.174245	1.22176	0.661518	1035.46	11.6871	1050.35	12.0884	1081.44	27.767	1081.44	27.767	95.7476
RKB-HPR-1-Spot 89	125.42	75664.2	2.275	13.2387	1.15728	1.75589	1.64285	0.168594	1.16606	0.709774	1004.36	10.8446	1029.34	10.6287	1082.81	23.208	1082.81	23.208	92.7544
RKB-HPR-1-Spot 96	60.8187	28019.1	2.05073	13.1572	1.39811	1.9259	1.77808	0.183779	1.09857	0.61784	1087.58	10.9944	1090.12	11.8844	1095.2	27.9783	1095.2	27.9783	99.3046
RKB-HPR-1-Spot 58	59.4258	73499.3	1.5043	13.1254	1.45929	1.93802	1.79588	0.184488	1.04673	0.582849	1091.45	10.5097	1094.31	12.029	1100.04	29.1756	1100.04	29.1756	99.2187
RKB-HPR-1-Spot 102	59.9476	57835	3.52798	13.123	1.30645	1.86959	1.64472	0.177942	0.999146	0.607485	1055.72	9.72974	1070.38	10.8809	1100.36	26.1165	1100.36	26.1165	95.943
RKB-HPR-1-Spot 53	405.574	80246.7	2.48632	13.0588	0.745487	2.08709	1.44847	0.197671	1.2419	0.857387	1162.8	13.2133	1144.57	9.94365	1110.17	14.8824	1110.17	14.8824	104.741
RKB-HPR-1-Spot 9	61.435	40821.7	0.915707	13.0117	1.27876	1.94403	1.64589	0.183457	1.03622	0.629577	1085.83	10.355	1096.39	11.0359	1117.42	25.5323	1117.42	25.5323	97.1729
RKB-HPR-1-Spot 1	205.059	79750.4	1.82215	12.8774	1.27042	2.16115	1.82948	0.201841	1.31645	0.719574	1185.2	14.2523	1168.64	12.7005	1138.1	25.2726	1138.1	25.2726	104.139
RKB-HPR-1-Spot 7	120.711	51567.4	2.40737	12.8403	1.30219	2.06109	1.86718	0.191942	1.33816	0.716674	1131.88	13.8912	1135.98	12.7661	1143.83	25.8648	1143.83	25.8648	98.9554
RKB-HPR-1-Spot 101	239.378	203163	2.71186	12.8331	1.18835	2.15056	1.80345	0.200162	1.35656	0.752202	1176.19	14.5848	1165.23	12.5003	1144.91	23.5975	1144.91	23.5975	102.732
RKB-HPR-1-Spot 114	79.3045	57117.1	2.78975	12.7603	1.41698	2.09639	1.80143	0.194014	1.11234	0.617479	1143.08	11.6514	1147.62	12.3847	1156.2	28.1132	1156.2	28.1132	98.8656
RKB-HPR-1-Spot 27	37.2318	53192.4	0.906291	12.6948	1.94068	1.96095	2.34481	0.180547	1.31603	0.561251	1069.96	12.9745	1102.21	15.7692	1166.41	38.4302	1166.41	38.4302	91.7313
RKB-HPR-1-Spot 116	120.864	64766.1	1.58757	12.674	1.55487	2.07775	1.96106	0.190987	1.19504	0.609388	1126.72	12.3538	1141.49	13.4433	1169.66	30.7893	1169.66	30.7893	96.3292
RKB-HPR-1-Spot 21	44.084	158478	2.39425	12.6301	1.49451	2.16696	1.84609	0.198497	1.08375	0.587051	1167.24	11.5709	1170.5	12.8267	1176.56	29.5621	1176.56	29.5621	99.208
RKB-HPR-1-Spot 35	166.864	148632	2.03543	12.6098	1.1281	2.07174	1.65683	0.189471	1.21345	0.732394	1118.51	12.4604	1139.51	11.3469	1179.73	22.305	1179.73	22.305	94.8107
RKB-HPR-1-Spot 56	104.827	197637	1.88867	12.2588	1.05979	2.32616	1.35123	0.206817	0.83826	0.620368	1211.84	9.26066	1220.3	9.59552	1235.32	20.8056	1235.32	20.8056	98.0988
RKB-HPR-1-Spot 10	115.3	114666	1.60966	12.2246	1.20731	2.33805	1.67973	0.207294	1.16786	0.695264	1214.39	12.9265	1223.93	11.9468	1240.77	23.6554	1240.77	23.6554	97.8733
RKB-HPR-1-Spot 87	254.095	195386	3.60336	12.1163	0.941421	2.48004	1.3707	0.217934	0.996264	0.726829	1270.95	11.492	1266.23	9.91882	1258.23	18.4052	1258.23	18.4052	101.011
RKB-HPR-1-Spot 103	157.958	117504	1.6977	11.7948	1.03121	2.6549	1.71554	0.227111	1.37101	0.799172	1319.34	16.3574	1316.01	12.6539	1310.57	20.0113	1310.57	20.0113	100.669
RKB-HPR-1-Spot 57	90.7175	97825.7	1.16382	11.6415	0.995877	2.69145	1.54063	0.227245	1.17549	0.762992	1320.04	14.0314	1326.11	11.4061	1335.91	19.2571	1335.91	19.2571	98.8127
RKB-HPR-1-Spot 34	379.663	102231	2.09165	11.4593	0.772998	2.77377	1.48294	0.230529	1.26554	0.853398	1337.27	15.2837	1348.5	11.0679	1366.35	14.8838	1366.35	14.8838	97.872
RKB-HPR-1-Spot 39	92.6205	69640.6	1.22526	11.3278	1.13438	2.85609	1.52676	0.234648	1.02185	0.669293	1358.81	12.5193	1370.41	11.4827	1388.53	21.7758	1388.53	21.7758	97.8597
RKB-HPR-1-Spot 40	243.4	62842.7	1.37343	11.0739	0.748305	3.11696	1.32216	0.250341	1.09003	0.824426	1440.23	14.0688	1436.88	10.1645	1431.91	14.279	1431.91	14.279	100.581
RKB-HPR-1-Spot 31	184.606	204531	1.80637	10.8115	0.747059	3.33214	1.34445	0.26128	1.11779	0.83141	1496.39	14.9271	1488.61	10.5005	1477.54	14.1679	1477.54	14.1679	101.276
RKB-HPR-1-Spot 108	489.4	254160	3.96497	10.7647	0.574717	3.45661	1.0097	0.269867	0.830183	0.822204	1540.13	11.3732	1517.38	7.95205	1485.76	10.8874	1485.76	10.8874	103.659
RKB-HPR-1-Spot 73	198.423	219770	2.05524	10.7204	0.851266	3.39948	1.30401	0.264315	0.987825	0.757527	1511.88	13.3127	1504.28	10.2315	1493.57	16.1096	1493.57	16.1096	101.226
RKB-HPR-1-Spot 63	123.588	351064	3.17074	10.5227	1.05737	3.19746	1.67054	0.244023	1.29332	0.774193	1407.58	16.3541	1456.55	12.922	1528.71	19.9154	1528.71	19.9154	92.0764
RKB-HPR-1-Spot 36	207.024	72124.4	2.29268	10.5056	0.948075	3.55621	1.41804	0.27096	1.05451	0.74364	1545.67	14.4925	1539.82	11.2388	1531.77	17.8494	1531.77	17.8494	100.908
RKB-HPR-1-Spot 88	277.599	203192	3.96053	10.2621	0.595029	3.73678	1.0584	0.278122	0.875297	0.827002	1581.89	12.2783	1579.28	8.47819	1575.78	11.1372	1575.78	11.1372	100.388
RKB-HPR-1-Spot 84	119.754	120439	1.10471	10.2575	1.23092	3.71128	1.9962	0.276098	1.57151	0.787251	1571.68	21.9188	1573.8	15.9681	1576.63	23.039	1576.63	23.039	99.6864
RKB-HPR-1-Spot 83	167.695	131665	1.05046	10.1674	0.826904	3.721	1.39432	0.274389	1.12266	0.805166	1563.04	15.5823	1575.9	11.1593	1593.13	15.4446	1593.13	15.4446	98.1112
RKB-HPR-1-Spot 67	252.654	50700.2	1.37022	10.1026	0.975965	3.95331	1.46503	0.289664	1.09261	0.745794	1639.85	15.8198	1624.67	11.873	1605.05	18.1989	1605.05	18.1989	102.168
RKB-HPR-1-Spot 71	25.2928	36119.3	0.77602	10.0824	1.60207	3.84613	2.11832	0.281246	1.38587	0.654234	1597.64	19.6109	1602.46	17.0722	1608.78	29.8618	1608.78	29.8618	99.307
RKB-HPR-1-Spot 90	161.645	52559.9	1.61946	10.0425	0.869265	3.87573	1.24041	0.282288	0.884873	0.71337	1602.88	12.5576	1608.64	10.0121	1616.18	16.1857	1616.18	16.1857	99.177
RKB-HPR-1-Spot 29	103.658	99806.5	1.49634	10.0129	0.815302	3.86497	1.3223	0.280675	1.04104	0.787294	1594.76	14.708	1606.4	10.667	1621.67	15.17	1621.67	15.17	98.3407
RKB-HPR-1-Spot 43	120.518	85717.5	1.5591	10.0047	0.915049	3.88736	1.44144	0.282071	1.11375	0.772663	1601.78	15.7962	1611.06	11.6419	1623.19	17.0229	1623.19	17.0229	98.6813
RKB-HPR-1-Spot 30	83.6014	61953.5	1.66567	9.95293	1.22973	4.0767	1.72483	0.294279	1.20946	0.701206	1662.88	17.7273	1649.65	14.0647	1632.84	22.8496	1632.84	22.8496	101.84
RKB-HPR-1-Spot 44	226.038	329205	0.847415	9.95091	0.896982	3.99822	1.29431	0.288555	0.933093	0.720919	1634.3	13.4701	1633.83	10.5132	1633.21	16.6652	1633.21	16.6652	100.067
RKB-HPR-1-Spot 75	65.6726	53470.4	2.67659	9.898	1.24136	4.07453	1.64024	0.292499	1.0721	0.653624	1654	15.6404	1649.22	13.3734	1643.11	23.0336	1643.11	23.0336	100.663
RKB-HPR-1-Spot 3	341.246	165447	0.708758	9.82602	0.722369	4.02966	1.38308	0.287174	1.17945	0.852768	1627.39	16.9631	1640.2	11.2519	1656.65	13.3803	1656.65	13.3803	98.2342
RKB-HPR-1-Spot 113	264.501	257279	1.09458	9.81097	0.898673	4.05526	1.38488	0.288555	1.0537	0.76086	1634.31	15.2112	1645.36	11.2807	1659.49	16.6404	1659.49	16.6404	98.4827
RKB-HPR-1-Spot 32	75.598	106744	0.844287	9.7927	1.21345	3.94367	1.56231	0.280093	0.984058	0.629872	1591.83	13.8803	1622.69	12.6553	1662.94	22.4601	1662.94	22.4601	95.7241
RKB-HPR-1-Spot 69	138.05	173558	1.98392	9.60772	0.807684	4.41576	1.2791	0.307698	0.991836	0.775418	1729.37	15.0444	1715.3	10.59	1698.15	14.882	1698.15	14.882	101.838
RKB-HPR-1-Spot 110	210.72	51475.8	2.64409	9.59057	0.75448	4.48597	1.34141	0.312032	1.10911	0.826829	1750.7	17.004	1728.38	11.1381	1701.44	13.8958	1701.44	13.8958	102.895
RKB-HPR-1-Spot 68	52.7087	121501	1.28039	9.56033	1.08735	4.28829	1.62021	0.297342	1.20114	0.741349	1678.11	17.7466	1691.12	13.3412	1707.26	20.013	1707.26	20.013	98.293
RKB-HPR-1-Spot 106	276.812	224561	1.19773	9.50563	0.699017	4.52916	1.23201	0.312246	1.01451	0.823457	1751.75	15.5617	1736.34	10.2475	1717.81	12.8494	1717.81	12.8494	101.976
RKB-HPR-1-Spot 120	311.145	302351	2.88022	9.36995	0.968813	4.56754	1.52327	0.310397	1.17548	0.771682	1742.66	17.9494	1743.36	12.6896	1744.19	17.7484	1744.19	17.7484	99.9123
RKB-HPR-1-Spot 91	114.455	97724.4	1.28584	9.30155	0.985785	4.52715	1.46434	0.305407	1.08283	0.739468	1718.07	16.3311	1735.97	12.1792	1757.6	18.0293	1757.6	18.0293	97.7505
RKB-HPR-1-Spot 92	63.0866	995601	0.804513	9.24711	1.11796	4.6176	1.80342	0.309686	1.41509	0.784673	1739.16	21.5704	1752.45	15.053	1768.33	20.4197	1768.33	20.4197	98.3504
RKB-HPR-1-Spot 12	257.94	58051	2.92435	9.17246	0.821638	4.55572	1.22131	0.303069	0.903605	0.739867	1706.51	13.5479	1741.21	10.1692	1783.12	14.9793	1783.12	14.9793	95.7036
RKB-HPR-1-Spot 86	86.6925	127329	1.00046	9.15208	1.13838	4.73864	1.81327	0.314537	1.4114	0.778372	1763	21.7705	1774.1	15.2044	1787.18	20.7444	1787.18	20.7444	98.6471
RKB-HPR-1-Spot 55	155.527	1.21261e+06	1.65078	9.11673	0.811369	4.90071	1.29533	0.324039	1.00974	0.779519	1809.42	15.9303	1802.38	10.924	1794.22	14.7718	1794.22	14.7718	100.847
RKB-HPR-1-Spot 16	147.455	191158	4.48144	9.11426	0.897003	4.76834	1.43622	0.315201	1.12165	0.780977	1766.25	17.329	1779.34	12.0555	1794.72	16.3301	1794.72	16.3301	98.4138
RKB-HPR-1-Spot 66	131.407	218174	1.0463	8.99557	0.837183	5.10379	1.46218	0.332982	1.19879	0.819864	1852.82	19.3045	1836.74	12.415	1818.54	15.1964	1818.54	15.1964	101.885
RKB-HPR-1-Spot 15	167.865	191521	1.9197	8.53534	0.89751	5.62793	1.37839	0.348392	1.04615	0.758967	1926.92	17.4247	1920.39	11.8848	1913.33	16.1065	1913.33	16.1065	100.71
RKB-HPR-1-Spot 78	89.887	94885.3	0.809533	7.86626	1.05604	6.63846	1.56093	0.378734	1.14947	0.736403	2070.37	20.355	2064.47	13.7753	2058.58	18.634	2058.58	18.634	100.573
RKB-HPR-1-Spot 81	111.179	93834.8	0.438259	7.78075	1.00706	6.59388	1.64407	0.372101	1.29954	0.790439	2039.28	22.7187	2058.53	14.4963	2077.84	17.7308	2077.84	17.7308	98.1441
RKB-HPR-1-Spot 119	24.9343	145406	0.806334	7.32753	1.33272	7.39916	1.76876	0.393223	1.16291	0.657472	2137.76	21.1585	2160.87	15.8227	2182.88	23.1923	2182.88	23.1923	97.9328
RKB-HPR-1-Spot 45	368.914	159142	8.43719	7.01568	2.83096	7.92831	4.6005	0.403412	3.62633	0.788247	2184.73	67.1994	2222.9	41.5039	2258.25	48.8694	2258.25	48.8694	96.7443
RKB-HPR-1-Spot 77	47.3835	85713.8	1.52842	6.69117	1.22956	8.80768	1.81896	0.427427	1.34044	0.736931	2294.11	25.8748	2318.29	16.5877	2339.64	21.0399	2339.64	21.0399	98.0539
RKB-HPR-1-Spot 115	657.366	3.07772e+06	8.14453	5.4513	0.880713	12.615	1.32712	0.498754	0.992776	0.748066	2608.44	21.2974	2651.34	12.4863	2684.23	14.562	2684.23	14.562	97.1764
RKB-HPR-1-Spot 54	295.873	1.2858e+06	1.89771	5.09421	0.708447	14.7584	1.20341	0.545272	0.972784	0.808353	2805.48	22.1281	2799.79	11.4443	2795.68	11.5965	2795.68	11.5965	100.351
17f--Cedar Hills Sandstone, Rebecca K. Bounds Core, Depth 2382 ft. ( 38.48963, -101.97456)
12RKB2382-2	31.4977	11858	1.58431	13.6641	6.44451	1.67366	7.01876	0.165862	2.78053	0.396156	989.27	25.5004	998.578	44.6407	1019.05	130.609	1019.05	130.609	97.0776
12RKB2382-3	173.045	107478	2.37484	13.7087	0.82495	1.71367	1.18849	0.170382	0.855553	0.719864	1014.22	8.02901	1013.66	7.62088	1012.44	16.7031	1012.44	16.7031	100.176
12RKB2382-5	98.7797	64566.2	2.06677	12.6216	1.74891	2.18109	2.6191	0.199659	1.94961	0.744382	1173.49	20.917	1175.03	18.2359	1177.88	34.5746	1177.88	34.5746	99.6267
12RKB2382-6	157.728	56675.3	6.75729	13.1568	1.11287	1.88873	2.01901	0.180226	1.68461	0.834376	1068.21	16.5834	1077.13	13.4047	1095.26	22.2799	1095.26	22.2799	97.5307
12RKB2382-7	349.556	167074	2.35743	11.7345	0.47272	2.71818	0.726332	0.231335	0.551447	0.759222	1341.49	6.67863	1333.44	5.39159	1320.51	9.16032	1320.51	9.16032	101.589
12RKB2382-8	303.28	46111.5	1.27125	17.7774	1.97658	0.560416	2.67028	0.0722566	1.79542	0.672371	449.736	7.79944	451.797	9.73801	462.275	43.8346	449.736	7.79944	97.2877
12RKB2382-9	34.8134	19184.5	2.1393	13.1605	3.91678	1.83083	5.14899	0.17475	3.34229	0.649116	1038.23	32.0507	1056.58	33.8257	1094.7	78.4649	1094.7	78.4649	94.8414
12RKB2382-10	48.1548	21198	0.705242	13.508	4.28363	1.76053	5.33063	0.172477	3.17271	0.595185	1025.75	30.0871	1031.04	34.5324	1042.27	86.4932	1042.27	86.4932	98.4144
12RKB2382-11	125.859	183368	1.59031	10.7396	1.15118	3.40362	2.90412	0.26511	2.66621	0.918079	1515.94	36.0177	1505.23	22.7955	1490.18	21.7955	1490.18	21.7955	101.728
12RKB2382-12	525.981	229178	1.63487	18.0821	1.96312	0.487569	4.11484	0.0639417	3.61636	0.878859	399.553	14.0106	403.253	13.6952	424.483	43.8097	399.553	14.0106	NA
12RKB2382-13	21.8623	9568.38	0.651488	14.0441	9.28058	1.64211	10.6545	0.167261	5.23342	0.491195	997	48.3435	986.524	67.3363	963.309	189.923	963.309	189.923	103.497
12RKB2382-14	120.026	14125.1	1.2821	19.314	7.86115	0.367867	8.35094	0.0515302	2.81788	0.337432	323.91	8.90186	318.071	22.8079	275.503	180.328	323.91	8.90186	NA
12RKB2382-16	42.338	31321.4	3.09706	11.9227	2.86231	2.62615	7.46054	0.227088	6.88962	0.923474	1319.22	82.1969	1307.99	54.9158	1289.6	55.7011	1289.6	55.7011	102.297
12RKB2382-17	160.202	46759.4	2.28873	12.6472	1.22935	2.16677	2.8864	0.198749	2.61151	0.904765	1168.6	27.9119	1170.44	20.0557	1173.88	24.3311	1173.88	24.3311	99.55
12RKB2382-19	85.6769	55685.3	1.93915	9.44722	1.31438	4.59001	1.70776	0.314497	1.09034	0.638465	1762.8	16.8166	1747.45	14.2392	1729.13	24.1256	1729.13	24.1256	101.947
12RKB2382-20	103.816	91711.4	3.29317	13.8615	1.65	1.67825	2.99377	0.16872	2.49802	0.834409	1005.05	23.2473	1000.32	19.0504	989.932	33.5628	989.932	33.5628	101.528
12RKB2382-21	127.113	189609	0.940521	5.71236	0.596636	11.8202	4.13156	0.489709	4.08825	0.989518	2569.42	86.6401	2590.26	38.6976	2606.59	9.93733	2606.59	9.93733	98.5738
12RKB2382-23	113.478	30225.2	0.617595	16.4705	4.41478	0.809759	4.82279	0.0967302	1.9414	0.402546	595.218	11.0381	602.319	21.9145	629.115	95.1511	595.218	11.0381	94.6119
12RKB2382-22	455.203	157999	3.84622	13.5892	0.464372	1.76462	2.36002	0.173918	2.31389	0.980451	1033.66	22.0988	1032.55	15.2966	1030.17	9.38766	1030.17	9.38766	100.339
12RKB2382-25	65.9573	24572.6	2.86463	12.4928	1.66879	2.29326	3.66767	0.207784	3.26603	0.890491	1217	36.2214	1210.21	25.9383	1198.12	32.9273	1198.12	32.9273	101.576
12RKB2382-26	467.209	64861.4	0.735358	17.8083	1.75473	0.556108	1.94823	0.0718258	0.84648	0.434487	447.146	3.65672	448.99	7.06962	458.443	38.9369	447.146	3.65672	97.5358
12RKB2382-27	100.233	21262.9	2.11997	12.1184	4.37774	2.29287	9.00718	0.201523	7.87177	0.873943	1183.5	85.1153	1210.09	63.7667	1257.88	85.6086	1257.88	85.6086	94.0865
12RKB2382-28	57.4134	39032	1.35438	10.2234	1.83506	3.65425	2.46945	0.270953	1.6525	0.669176	1545.64	22.7104	1561.44	19.6895	1582.85	34.3211	1582.85	34.3211	97.6486
12RKB2382-29	75.4848	23098.7	1.8787	15.7919	5.53472	1.05001	5.80486	0.120261	1.75022	0.30151	732.066	12.1121	728.885	30.1985	719.094	117.577	732.066	12.1121	101.804
12RKB2382-31	34.6779	73423.4	1.29458	5.01096	0.908847	15.1119	2.6766	0.549212	2.51758	0.940587	2821.9	57.5363	2822.32	25.4963	2822.61	14.8367	2822.61	14.8367	99.9746
12RKB2382-32	75.6865	31628.1	1.67499	12.8918	1.93122	2.08087	2.17553	0.194561	1.00165	0.460415	1146.04	10.5167	1142.52	14.921	1135.83	38.4422	1135.83	38.4422	100.899
12RKB2382-33	161.671	29681	1.16831	17.8953	5.12274	0.546596	5.68326	0.0709422	2.4611	0.433043	441.83	10.5096	442.764	20.3974	447.601	113.885	441.83	10.5096	98.7108
12RKB2382-34	46.9176	57007.8	2.27446	5.40119	0.614772	13.3052	1.13438	0.521206	0.953346	0.840413	2704.29	21.0567	2701.55	10.7135	2699.49	10.1527	2699.49	10.1527	100.178
12RKB2382-35	204.919	82268.1	2.19178	13.7555	0.660334	1.7352	1.22508	0.17311	1.03188	0.842297	1029.23	9.81593	1021.68	7.89155	1005.54	13.384	1005.54	13.384	102.356
12RKB2382-36	202.922	123430	0.761626	13.4904	0.90247	1.83017	1.12467	0.179067	0.671139	0.596744	1061.87	6.57064	1056.34	7.38484	1044.9	18.2237	1044.9	18.2237	101.624
12RKB2382-37	184.518	48562.2	1.4952	17.5738	4.68115	0.607232	4.84034	0.0773962	1.23115	0.254353	480.562	5.7013	481.813	18.5708	487.748	103.35	480.562	5.7013	98.5266
12RKB2382-38	103.557	56402.4	2.13249	12.8347	2.36585	2.10738	2.49305	0.196168	0.786183	0.315349	1154.7	8.31147	1151.22	17.1692	1144.65	47.023	1144.65	47.023	100.878
12RKB2382-39	397.1	349350	3.75319	12.1818	0.453565	2.44946	1.09082	0.216412	0.992049	0.909455	1262.89	11.3776	1257.26	7.86519	1247.67	8.8812	1247.67	8.8812	101.22
12RKB2382-40	282.547	32548.8	4.8281	17.7579	2.41726	0.479343	3.72487	0.0617356	2.83399	0.760829	386.172	10.6227	397.622	12.2558	464.727	53.5617	386.172	10.6227	NA
12RKB2382-41	38.4318	4478.77	0.949035	16.1431	18.7091	0.429757	19.7203	0.0503164	6.2336	0.316101	316.464	19.2508	363.004	60.2578	672.26	403.475	316.464	19.2508	NA
12RKB2382-43	76.1831	23716.4	4.52083	13.5044	3.48985	1.74753	3.65906	0.171159	1.09984	0.30058	1018.5	10.3617	1026.25	23.6353	1042.8	70.4162	1042.8	70.4162	97.6689
12RKB2382-44	68.5489	17545.6	1.20012	16.1524	4.12633	0.887158	4.60027	0.103929	2.0337	0.442082	637.392	12.3424	644.841	21.9621	670.996	88.3243	637.392	12.3424	94.992
12RKB2382-45	201.94	77904.1	3.0319	13.4486	1.09156	1.83308	1.34068	0.178796	0.778413	0.580611	1060.4	7.61111	1057.39	8.80823	1051.19	22.0167	1051.19	22.0167	100.875
12RKB2382-46	70.8824	20302.9	1.50309	17.4865	5.82962	0.481858	6.18303	0.0611112	2.06043	0.33324	382.38	7.64956	399.347	20.4175	498.731	128.499	382.38	7.64956	NA
12RKB2382-47	41.2849	14330.1	1.80524	14.0579	3.40965	1.6251	4.39237	0.165691	2.76897	0.630404	988.328	25.372	979.967	27.6166	961.299	69.6614	961.299	69.6614	102.812
12RKB2382-48	168.914	98202.4	1.95062	12.744	1.30969	2.10372	1.82184	0.194443	1.26641	0.695128	1145.4	13.2899	1150.02	12.5391	1158.74	25.9831	1158.74	25.9831	98.849
12RKB2382-49	128.622	288340	3.04513	10.077	0.7773	3.94678	1.38295	0.288451	1.14383	0.827096	1633.78	16.5076	1623.33	11.204	1609.79	14.485	1609.79	14.485	101.49
12RKB2382-50	456.988	77124.2	2.36176	17.9578	1.62987	0.519232	2.08212	0.0676258	1.29568	0.622286	421.836	5.29064	424.638	7.22572	439.857	36.2829	421.836	5.29064	95.903
12RKB2382-51	71.4466	62561.9	1.79307	13.3637	4.9651	1.83857	5.08987	0.178199	1.12007	0.220059	1057.13	10.9207	1059.35	33.4869	1063.95	99.9026	1063.95	99.9026	99.3584
12RKB2382-52	260.426	163743	2.27135	11.5805	0.643084	2.72611	1.33851	0.228965	1.1739	0.877023	1329.07	14.0987	1335.6	9.9438	1346.06	12.4167	1346.06	12.4167	98.7381
12RKB2382-53	155.346	85692.6	2.51674	12.6013	1.4967	2.14095	2.6886	0.195668	2.23348	0.830723	1152.01	23.562	1162.13	18.6102	1181.08	29.6004	1181.08	29.6004	97.5387
12RKB2382-54	182.597	91114.2	1.51978	13.0304	1.22984	1.89763	2.03913	0.179336	1.62652	0.797651	1063.35	15.9444	1080.26	13.5603	1114.51	24.5481	1114.51	24.5481	95.409
12RKB2382-55	93.6418	19493.4	1.62298	17.059	7.32292	0.698701	7.43341	0.0864455	1.27686	0.171773	534.481	6.54932	538.015	31.0547	553.023	160.001	534.481	6.54932	96.6471
12RKB2382-56	85.4158	43804.4	1.54686	13.4412	2.76911	1.85602	3.45824	0.180934	2.07158	0.599028	1072.08	20.4605	1065.57	22.8233	1052.3	55.7959	1052.3	55.7959	101.879
12RKB2382-57	90.1183	58789.8	2.01947	11.3858	1.66422	2.8819	2.82263	0.237981	2.27983	0.807697	1376.19	28.2522	1377.19	21.2805	1378.71	31.9898	1378.71	31.9898	99.8171
12RKB2382-58	845.544	65252.6	2.85407	12.0282	2.85104	2.35491	5.03276	0.205435	4.14732	0.824064	1204.45	45.5641	1229.05	35.8848	1272.46	55.6341	1272.46	55.6341	94.6551
12RKB2382-59	382.638	244735	1.8459	12.5966	0.498838	2.2348	1.80724	0.20417	1.73703	0.961151	1197.68	18.9859	1192.03	12.6783	1181.81	9.84872	1181.81	9.84872	101.343
12RKB2382-60	132.015	96821.2	4.51698	9.34329	0.893014	4.58788	1.56887	0.310893	1.28991	0.822192	1745.1	19.7207	1747.07	13.0799	1749.41	16.349	1749.41	16.349	99.7537
12RKB2382-61	326.663	63779.6	1.998	16.5362	1.36264	0.855513	2.43313	0.102603	2.01577	0.828469	629.647	12.0921	627.67	11.3914	620.535	29.3983	629.647	12.0921	101.468
12RKB2382-62	49.256	7238.81	0.546855	18.1018	11.9024	0.520799	12.2512	0.0683739	2.90247	0.236913	426.352	11.9744	425.685	42.6246	422.053	266.516	426.352	11.9744	101.018
12RKB2382-63	300.293	120382	3.41431	13.4629	0.928702	1.8202	2.55934	0.177728	2.38489	0.931841	1054.55	23.2007	1052.76	16.774	1049.06	18.7406	1049.06	18.7406	100.524
12RKB2382-65	595.128	331536	14.6589	12.8362	1.05798	2.15845	7.59784	0.200945	7.52381	0.990258	1180.4	81.1585	1167.77	52.769	1144.42	21.0241	1144.42	21.0241	103.144
12RKB2382-66	93.4381	59745	1.93122	11.7194	2.106	2.68761	2.76927	0.22844	1.79822	0.64935	1326.32	21.5567	1325.05	20.4963	1322.99	40.7997	1322.99	40.7997	100.251
12RKB2382-67	33.6242	29392.9	1.43205	13.6829	5.08595	1.73903	5.42886	0.172577	1.89885	0.349769	1026.29	18.0157	1023.1	35.0123	1016.27	103.094	1016.27	103.094	100.987
12RKB2382-68	54.3853	24310.6	3.02574	14.6712	4.89913	1.43263	5.24447	0.15244	1.87164	0.356878	914.627	15.9596	902.65	31.371	873.428	101.53	914.627	15.9596	104.717
12RKB2382-70	222.756	31277.8	1.97991	18.0288	3.48416	0.529243	3.93209	0.0692023	1.82262	0.463526	431.348	7.60459	431.307	13.8184	431.067	77.6731	431.348	7.60459	100.065
12RKB2382-71	235.72	89118.5	5.41754	12.6872	0.919283	2.21109	1.34168	0.203456	0.977255	0.728381	1193.86	10.6504	1184.56	9.38092	1167.59	18.2161	1167.59	18.2161	102.25
12RKB2382-72	259.689	188639	2.36412	10.722	0.453747	3.36401	2.07975	0.261597	2.02965	0.97591	1498.01	27.1303	1496.06	16.2799	1493.27	8.58707	1493.27	8.58707	100.317
12RKB2382-74	165.344	46916.5	2.14205	13.9166	1.54518	1.68914	2.41908	0.17049	1.86128	0.769417	1014.81	17.4768	1004.44	15.43	981.896	31.4595	981.896	31.4595	103.352
12RKB2382-75	342.103	77858.4	0.823233	8.65502	0.309878	5.49764	0.984366	0.345098	0.934319	0.949158	1911.15	15.4527	1900.23	8.45702	1888.31	5.57623	1888.31	5.57623	101.21
12RKB2382-76	258.663	132570	4.69915	10.9874	0.47621	3.21117	1.16523	0.255892	1.06347	0.912676	1468.79	13.9685	1459.86	9.02219	1446.87	9.06851	1446.87	9.06851	101.515
12RKB2382-77	22.1337	21030.5	2.56255	5.2897	0.951205	13.9873	1.88015	0.536617	1.62178	0.862581	2769.27	36.5102	2748.85	17.8188	2733.88	15.6551	2733.88	15.6551	101.295
12RKB2382-78	163.291	42264.4	1.04753	18.5405	2.80316	0.499252	3.26144	0.0671338	1.66713	0.511162	418.865	6.76097	411.196	11.0281	368.35	63.1594	418.865	6.76097	113.714
12RKB2382-79	284.648	109726	1.65968	15.0623	1.03981	1.22174	2.88516	0.133466	2.69127	0.932798	807.607	20.4286	810.571	16.111	818.738	21.7224	807.607	20.4286	98.6405
12RKB2382-80	245.578	275340	1.31711	9.43916	0.481667	4.48627	0.822763	0.307127	0.667035	0.810726	1726.55	10.1034	1728.43	6.83155	1730.7	8.83962	1730.7	8.83962	99.7603
12RKB2382-81	172.33	34608.7	1.0468	18.4202	4.85414	0.481676	5.04482	0.0643499	1.3739	0.272338	402.025	5.3547	399.222	16.6539	383.004	109.153	402.025	5.3547	104.966
12RKB2382-82	60.9988	21345.4	1.61734	16.355	6.80704	0.86392	7.04404	0.102476	1.81185	0.257217	628.904	10.8566	632.261	33.1629	644.302	146.427	628.904	10.8566	97.6102
12RKB2382-83	62.0962	70902	3.13146	7.47464	0.720639	7.35279	1.67619	0.398603	1.51337	0.902863	2162.61	27.8043	2155.25	14.9832	2148.23	12.5873	2148.23	12.5873	100.669
12RKB2382-84	2302.31	886302	4.36409	13.7	0.187496	1.76723	0.828574	0.175595	0.807082	0.974061	1042.87	7.77124	1033.5	5.37296	1013.73	3.80041	1013.73	3.80041	102.874
12RKB2382-85	164.257	3862.28	1.87259	13.2382	4.56226	1.78635	4.88333	0.171511	1.74146	0.356613	1020.43	16.4353	1040.5	31.7994	1082.87	91.5586	1082.87	91.5586	94.2344
12RKB2382-86	263.566	177109	4.14625	13.4849	0.697589	1.84407	3.32298	0.180353	3.24893	0.977717	1068.9	32.0017	1061.32	21.8807	1045.77	14.089	1045.77	14.089	102.212
12RKB2382-87	109.805	21726.6	0.883346	18.0525	9.30916	0.484787	9.70324	0.0634726	2.73723	0.282094	396.71	10.5315	401.352	32.1795	428.143	207.961	396.71	10.5315	NA
12RKB2382-88	116.1	32349.2	0.975693	17.4424	2.97694	0.676563	3.19421	0.0855882	1.15792	0.362506	529.392	5.88499	524.695	13.089	504.328	65.5412	529.392	5.88499	104.97
12RKB2382-89	138.044	54954.2	4.34348	13.4603	1.16647	1.88629	1.37785	0.184145	0.733355	0.532246	1089.58	7.35172	1076.28	9.14349	1049.45	23.5323	1049.45	23.5323	103.824
12RKB2382-90	311.22	58954.3	2.02064	18.2188	1.84024	0.508905	2.13354	0.0672443	1.07959	0.506009	419.532	4.38499	417.713	7.30656	407.657	41.1806	419.532	4.38499	102.913
12RKB2382-91	47.9168	15416.9	2.65099	12.9258	4.36907	1.92488	4.71777	0.180451	1.78005	0.377308	1069.44	17.5414	1089.76	31.5357	1130.61	87.0666	1130.61	87.0666	94.5897
12RKB2382-93	71.4147	74217.6	2.59187	7.38029	1.22535	7.82569	3.27314	0.418885	3.03512	0.927282	2255.42	57.7636	2211.17	29.4775	2170.39	21.3528	2170.39	21.3528	103.918
12RKB2382-94	133.291	68734	2.41342	13.5785	1.59406	1.82028	1.81269	0.179263	0.863041	0.476109	1062.95	8.45727	1052.79	11.8801	1031.75	32.2376	1031.75	32.2376	103.024
12RKB2382-95	547.852	360586	1.90355	13.0669	0.593033	1.96802	1.28187	0.18651	1.13644	0.88655	1102.44	11.5158	1104.63	8.63069	1108.93	11.8664	1108.93	11.8664	99.4146
12RKB2382-96	239.958	40976.6	1.31483	18.2296	2.71747	0.508616	3.03255	0.0672459	1.34602	0.443856	419.542	5.46726	417.518	10.3816	406.333	60.8144	419.542	5.46726	103.251
12RKB2382-97	209.045	238654	4.37722	10.1139	0.993929	3.66375	2.37467	0.268746	2.15666	0.908192	1534.43	29.4489	1563.51	18.9441	1602.98	18.5389	1602.98	18.5389	95.724
12RKB2382-98	730.669	964349	3.5455	12.0962	0.273851	2.38845	1.7183	0.209539	1.69633	0.987218	1226.36	18.9442	1239.15	12.2989	1261.44	5.35096	1261.44	5.35096	97.2188
12RKB2382-99	39.8615	23206.7	1.60107	13.7842	5.59904	1.72783	5.81901	0.172735	1.5848	0.27235	1027.16	15.0479	1018.94	37.4421	1001.31	113.788	1001.31	113.788	102.582
12RKB2382-100	153.948	42904.1	1.90788	13.9231	1.66666	1.66994	3.82673	0.16863	3.44472	0.900174	1004.56	32.0431	997.162	24.3075	980.912	33.939	980.912	33.939	102.411
17g--Flowerpot Shale Rebecca K. Bounds Core, Depth 2317 ft. ( 38.48963, -101.97456)
12RKB2317-1	132.718	76193.2	1.98196	12.7317	1.42166	2.12864	1.58075	0.196556	0.691133	0.437218	1156.79	7.31869	1158.14	10.9209	1160.65	28.1999	1160.65	28.1999	99.6674
12RKB2317-1	126.161	56525.8	3.36081	14.3067	2.41773	1.44265	2.61796	0.149693	1.00414	0.383558	899.241	8.42815	906.823	15.701	925.323	49.6758	925.323	49.6758	97.1814
12RKB2317-3	1004.29	595869	13.293	12.2679	0.148779	2.33593	0.736202	0.20784	0.721012	0.979367	1217.3	7.99798	1223.28	5.23448	1233.87	2.91957	1233.87	2.91957	98.6568
12RKB2317-4	73.2066	53213.9	1.90391	10.5184	1.46917	3.5257	2.41202	0.268964	1.91296	0.793092	1535.54	26.1379	1533	19.0819	1529.47	27.6701	1529.47	27.6701	100.397
12RKB2317-5	171.931	94756.3	2.11589	10.6451	0.819085	3.40318	0.999161	0.262744	0.572208	0.572689	1503.87	7.67521	1505.13	7.84138	1506.89	15.4715	1506.89	15.4715	99.7991
12RKB2317-6	58.5826	24298.8	1.9669	12.8648	4.03859	2.05893	4.18672	0.192106	1.10379	0.263641	1132.78	11.4665	1135.26	28.6213	1140	80.347	1140	80.347	99.3659
12RKB2317-7	121.083	221368	1.29889	5.6009	0.224391	12.5552	0.70383	0.510014	0.667102	0.947817	2656.69	14.5249	2646.87	6.61945	2639.37	3.72345	2639.37	3.72345	100.656
12RKB2317-8	312.993	156519	2.38441	12.7438	0.394048	2.11212	1.07584	0.195216	1.00108	0.930509	1149.57	10.5404	1152.77	7.41392	1158.77	7.79653	1158.77	7.79653	99.206
12RKB2317-9	167.716	74939.3	0.80636	13.304	1.35613	1.81537	1.59466	0.175164	0.838953	0.526102	1040.5	8.06125	1051.02	10.441	1072.95	27.227	1072.95	27.227	96.9756
12RKB2317-11	196.814	39461.3	3.05549	13.7661	1.92743	1.67285	2.04966	0.16702	0.697206	0.340158	995.669	6.43234	998.27	13.0262	1003.97	39.1035	1003.97	39.1035	99.1733
12RKB2317-12	219.939	72786.3	16.5057	12.5613	0.615034	2.21171	0.858115	0.201494	0.59841	0.697354	1183.34	6.46931	1184.75	6.00029	1187.35	12.1445	1187.35	12.1445	99.6626
12RKB2317-13	670.343	88824.5	2.98128	12.6008	0.45601	2.14553	0.877152	0.196078	0.749301	0.854242	1154.22	7.91853	1163.61	6.07506	1181.15	8.9952	1181.15	8.9952	97.7197
12RKB2317-14	113.922	49885	1.52553	12.8256	2.28626	2.12712	2.8377	0.197864	1.68095	0.592361	1163.83	17.8991	1157.65	19.6019	1146.11	45.4358	1146.11	45.4358	101.546
12RKB2317-15	64.499	35245.1	1.94997	11.8532	3.89426	2.5536	4.02243	0.219527	1.00733	0.250428	1279.38	11.6893	1287.47	29.3578	1300.97	75.6979	1300.97	75.6979	98.3402
12RKB2317-16	202.722	40223	2.06758	17.144	2.31687	0.717345	2.68208	0.0891945	1.35119	0.503782	550.772	7.1329	549.099	11.376	542.171	50.66	550.772	7.1329	101.586
12RKB2317-17	44.3137	22044.4	1.34005	13.6561	5.88692	1.69057	6.15748	0.16744	1.80519	0.29317	997.991	16.6904	1004.98	39.3042	1020.23	119.296	1020.23	119.296	97.8204
12RKB2317-18	131.384	121641	1.22104	8.61508	0.742063	5.4381	2.47781	0.339786	2.36408	0.954101	1885.64	38.6505	1890.88	21.2545	1896.62	13.343	1896.62	13.343	99.4208
12RKB2317-19	117.38	67059.1	0.99425	12.2791	2.19798	1.98623	2.58125	0.176887	1.35342	0.524328	1049.94	13.1133	1110.84	17.4345	1232.07	43.1169	1232.07	43.1169	85.2176
12RKB2317-20	94.6136	9899.79	1.66069	18.604	8.76878	0.519042	9.29752	0.0700337	3.0907	0.332421	436.359	13.0402	424.511	32.2683	360.647	198.173	436.359	13.0402	120.993
12RKB2317-21	49.1958	65688.6	2.97579	3.89421	0.519373	23.0474	0.779672	0.650938	0.581498	0.745824	3231.87	14.7801	3228.94	7.58759	3227.12	8.19667	3227.12	8.19667	100.147
12RKB2317-22	151.95	15825.5	3.66232	13.7775	1.34757	1.68079	3.13415	0.167951	2.82965	0.902846	1000.81	26.2308	1001.28	19.9552	1002.29	27.3474	1002.29	27.3474	99.8521
12RKB2317-22B	85.8035	29990.7	4.23533	12.1512	1.94091	2.2913	2.42667	0.20193	1.45657	0.600233	1185.68	15.7751	1209.61	17.1552	1252.56	37.9773	1252.56	37.9773	94.6605
12RKB2317-23	90.5064	16630.8	1.60186	18.8124	5.40631	0.478001	5.73991	0.0652185	1.92832	0.335949	407.284	7.61077	396.7	18.8512	335.463	122.607	407.284	7.61077	121.41
12RKB2317-24	198.006	49157.5	3.39994	13.5338	1.2121	1.80753	1.42321	0.177421	0.745888	0.524088	1052.87	7.24546	1048.19	9.30407	1038.42	24.4924	1038.42	24.4924	101.392
12RKB2317-25	103.354	31320.7	1.82523	13.3885	3.28222	1.78308	3.49076	0.173141	1.18844	0.340454	1029.4	11.307	1039.3	22.7126	1060.22	66.0549	1060.22	66.0549	97.0925
12RKB2317-26	70.1614	19748.7	2.40076	13.5699	5.19723	1.68442	5.61897	0.165778	2.13578	0.380101	988.806	19.5788	1002.65	35.8151	1033.03	105.077	1033.03	105.077	95.7185
12RKB2317-27	168.045	68471	3.58402	13.3153	1.2416	1.90791	1.58949	0.18425	0.992425	0.624367	1090.15	9.95359	1083.86	10.5896	1071.24	24.9429	1071.24	24.9429	101.765
12RKB2317-28	51.685	46264.4	2.99826	13.7644	4.7172	1.6273	5.13436	0.162452	2.02723	0.394836	970.386	18.263	980.817	32.3014	1004.22	95.788	1004.22	95.788	96.6305
12RKB2317-29	84.4302	14642.6	2.5787	18.7988	9.69994	0.659645	9.79715	0.0899371	1.3767	0.14052	555.165	7.32311	514.397	39.5589	337.116	220.216	555.165	7.32311	164.681
12RKB2317-30	74.6459	36489.7	1.20314	10.8005	1.6365	3.22036	1.91901	0.252258	1.00223	0.522264	1450.11	13.0148	1462.07	14.8694	1479.47	31.0295	1479.47	31.0295	98.0157
12RKB2317-31	83.8024	42220.7	2.26461	13.5056	2.67286	1.7926	2.99427	0.175588	1.34962	0.450734	1042.82	12.9948	1042.77	19.5186	1042.63	53.943	1042.63	53.943	100.018
12RKB2317-32	154.231	19569.5	1.92284	18.3398	6.38649	0.495711	6.63116	0.0659358	1.78465	0.269131	411.624	7.11642	408.795	22.3187	392.826	143.383	411.624	7.11642	104.785
12RKB2317-33	723.914	94658	5.12206	5.57147	0.274312	11.5219	1.20297	0.465576	1.17128	0.973654	2464.13	23.9863	2566.36	11.2398	2648.11	4.55215	2648.11	4.55215	93.0525
12RKB2317-34	116.143	63531.1	1.43852	10.3572	0.984439	3.73925	2.08068	0.280884	1.83306	0.880991	1595.81	25.9128	1579.81	16.6705	1558.5	18.4689	1558.5	18.4689	102.394
12RKB2317-37	435.001	374182	48.4547	13.4715	0.493496	1.81256	1.01788	0.177096	0.890251	0.87461	1051.09	8.6343	1050	6.66077	1047.76	9.96855	1047.76	9.96855	100.317
12RKB2317-38	236.053	49589.2	4.73828	18.3929	5.20215	0.501732	6.23986	0.0669302	3.4458	0.552224	417.635	13.9346	412.874	21.1713	386.33	116.919	417.635	13.9346	108.103
12RKB2317-39	118.173	117407	1.78376	9.05076	0.900489	5.03903	1.34553	0.330773	0.999787	0.743042	1842.13	16.0196	1825.91	11.4004	1807.44	16.368	1807.44	16.368	101.919
12RKB2317-40	147.414	24063.2	1.56951	18.6953	4.02962	0.500491	4.35146	0.0678622	1.64238	0.377433	423.264	6.72831	412.035	14.7387	349.624	91.1256	423.264	6.72831	121.062
12RKB2317-41	69.0163	26060.1	1.45929	13.8608	2.79831	1.67139	3.09099	0.168021	1.31288	0.424745	1001.2	12.1747	997.713	19.6391	990.083	56.9376	990.083	56.9376	101.122
12RKB2317-42	82.2336	17527.5	4.92344	19.92	13.6409	0.401519	13.8054	0.0580089	2.12499	0.153924	363.505	7.51068	342.75	40.1804	204.279	317.782	363.505	7.51068	NA
12RKB2317-43	85.9769	22868.8	1.13897	18.4718	13.5033	0.441833	14.043	0.0591923	3.85594	0.27458	370.711	13.8912	371.544	43.7222	376.718	305.022	370.711	13.8912	NA
12RKB2317-44	80.0225	38413.4	1.57166	9.91591	1.70727	4.06289	2.27079	0.29219	1.49724	0.659347	1652.47	21.8248	1646.89	18.5051	1639.76	31.6945	1639.76	31.6945	100.775
12RKB2317-45	199.871	25770.6	8.12466	18.2996	3.91495	0.507932	4.06872	0.0674135	1.10798	0.272316	420.554	4.5109	417.058	13.9168	397.741	87.7803	420.554	4.5109	105.736
12RKB2317-46	111.594	10719.5	2.45534	18.8942	7.36845	0.443728	7.66093	0.0608056	2.09663	0.273678	380.523	7.74725	372.878	23.9124	325.63	167.467	380.523	7.74725	NA
12RKB2317-47	258.77	42910.4	3.96256	13.4887	0.637767	1.85336	0.966282	0.181313	0.725916	0.751247	1074.14	7.18238	1064.63	6.37299	1045.2	12.8823	1045.2	12.8823	102.769
12RKB2317-48	464.513	167692	1.76829	13.0354	0.487314	2.05097	0.824559	0.193903	0.665149	0.806672	1142.48	6.96389	1132.62	5.6283	1113.74	9.72749	1113.74	9.72749	102.58
12RKB2317-49	57.6655	25898.7	1.20268	12.837	2.31712	2.13677	2.59298	0.198939	1.16384	0.448843	1169.62	12.449	1160.78	17.937	1144.3	46.0416	1144.3	46.0416	102.213
12RKB2317-50	291.321	180445	1.57953	8.79276	0.328608	5.31435	0.614114	0.338902	0.518799	0.844793	1881.39	8.46531	1871.17	5.24812	1859.83	5.9357	1859.83	5.9357	101.159
12RKB2317-51	181.905	141014	1.57882	12.1552	1.50112	2.46338	1.61245	0.217166	0.588758	0.365133	1266.88	6.77169	1261.35	11.6457	1251.94	29.3746	1251.94	29.3746	101.194
12RKB2317-52	33.1914	9871.14	0.985855	13.4523	6.4406	1.87613	7.01171	0.183045	2.77177	0.395306	1083.59	27.6462	1072.7	46.4741	1050.64	129.927	1050.64	129.927	103.136
12RKB2317-53	134.327	61441.2	2.79416	13.0785	1.07139	1.9625	2.87008	0.186152	2.66261	0.927712	1100.49	26.9373	1102.74	19.3076	1107.19	21.4217	1107.19	21.4217	99.3953
12RKB2317-54	267.502	37026.3	4.55164	18.1366	1.87746	0.482632	2.27182	0.0634848	1.27918	0.563065	396.784	4.92253	399.877	7.5092	417.771	41.9593	396.784	4.92253	NA
12RKB2317-55	284.171	28548.3	1.88964	18.2637	3.19844	0.51542	3.75704	0.0682731	1.97113	0.524649	425.743	8.12082	422.088	12.9756	402.144	71.6459	425.743	8.12082	105.868
12RKB2317-56	255.565	154880	3.36729	9.13025	0.539138	4.977	3.34903	0.329571	3.30535	0.986957	1836.3	52.8181	1815.42	28.3234	1791.53	9.81996	1791.53	9.81996	102.499
12RKB2317-57	198.375	64637.3	1.36908	17.6927	4.54544	0.536603	5.82131	0.0688568	3.63684	0.624746	429.265	15.1032	436.182	20.6444	472.859	100.621	429.265	15.1032	90.7807
12RKB2317-58	122.729	49148.1	2.19521	13.5198	2.16008	1.7764	2.8384	0.174185	1.84135	0.648727	1035.13	17.6087	1036.87	18.4421	1040.51	43.6236	1040.51	43.6236	99.4821
12RKB2317-59	193.891	154547	3.51605	12.7437	0.871905	2.23238	1.92872	0.20633	1.72039	0.891985	1209.24	18.9689	1191.27	13.526	1158.78	17.3115	1158.78	17.3115	104.354
12RKB2317-60	269.461	195492	2.83421	10.8542	0.706851	3.32108	1.30949	0.261444	1.10233	0.8418	1497.22	14.7279	1486.02	10.2196	1470.05	13.4188	1470.05	13.4188	101.849
12RKB2317-61	159.389	49155.6	1.47835	17.6194	4.73395	0.593862	5.0094	0.0758883	1.63824	0.327033	471.534	7.4491	473.331	18.954	482.072	104.64	471.534	7.4491	97.814
12RKB2317-62	181.153	81645.6	3.28425	13.2729	0.654807	1.89379	1.44656	0.182305	1.28987	0.891681	1079.55	12.8213	1078.91	9.61269	1077.62	13.1245	1077.62	13.1245	100.18
12RKB2317-63	385.503	67532.6	1.53723	18.3102	2.12567	0.50311	2.30883	0.0668121	0.901248	0.390348	416.921	3.63856	413.805	7.84699	396.444	47.6412	416.921	3.63856	105.165
12RKB2317-64	224.925	67630.6	2.36743	12.6644	0.889498	2.20375	1.10693	0.202416	0.658856	0.595209	1188.29	7.14989	1182.23	7.73148	1171.19	17.6278	1171.19	17.6278	101.46
12RKB2317-65	224.685	124002	2.97681	13.5943	1.09174	1.77319	2.4049	0.174828	2.14281	0.891019	1038.66	20.5561	1035.69	15.6148	1029.41	22.0914	1029.41	22.0914	100.898
12RKB2317-66	58.5359	48351.2	2.92681	11.3687	3.49915	2.89501	4.62225	0.238703	3.02011	0.653387	1379.95	37.5178	1380.61	34.8976	1381.62	67.2514	1381.62	67.2514	99.8795
12RKB2317-68B	34.4149	60877.4	2.11727	12.7349	4.08781	2.21287	4.37787	0.204386	1.56702	0.357942	1198.84	17.1428	1185.12	30.6258	1160.15	81.081	1160.15	81.081	103.335
12RKB2317-69	46.8835	66979.8	1.6606	12.9581	4.87311	2.12769	5.5955	0.199962	2.74997	0.491462	1175.12	29.5413	1157.84	38.669	1125.65	97.1735	1125.65	97.1735	104.394
12RKB2317-71	243.984	159680	2.57554	11.562	0.487355	2.7007	1.23507	0.226469	1.13485	0.918854	1315.97	13.5086	1328.65	9.1522	1349.14	9.40628	1349.14	9.40628	97.5413
12RKB2317-72	91.7762	76066.5	2.89198	14.3129	2.75584	1.4896	3.14573	0.154631	1.51688	0.482202	926.871	13.0955	926.152	19.1136	924.462	56.6392	924.462	56.6392	100.261
12RKB2317-73	236.492	74681.7	1.45492	9.03216	0.342211	4.76221	0.825629	0.31196	0.751369	0.910056	1750.35	11.5173	1778.26	6.92853	1811.17	6.21614	1811.17	6.21614	96.6415
12RKB2317-74	100.964	55899.7	1.87906	13.2542	1.7608	1.8304	2.1687	0.175954	1.26603	0.583772	1044.83	12.2115	1056.42	14.2415	1080.47	35.3304	1080.47	35.3304	96.7015
12RKB2317-75	61.6858	21198.1	2.27526	13.748	3.98262	1.76726	4.28179	0.176213	1.57241	0.367231	1046.25	15.1857	1033.51	27.7724	1006.64	80.8263	1006.64	80.8263	103.935
12RKB2317-76	619.864	125614	1.82699	18.0362	1.4865	0.514881	1.69249	0.0673521	0.809222	0.478126	420.183	3.29177	421.726	5.84101	430.15	33.1547	420.183	3.29177	97.683
12RKB2317-77	86.0177	79357.4	1.48696	10.9533	1.40278	3.18343	2.58703	0.252893	2.17369	0.840226	1453.38	28.284	1453.15	19.9917	1452.79	26.6931	1452.79	26.6931	100.041
12RKB2317-78	87.7825	29877.3	2.21112	13.8469	3.47242	1.68819	3.75844	0.16954	1.4381	0.382631	1009.58	13.4389	1004.08	23.9706	992.088	70.625	992.088	70.625	101.763
12RKB2317-79	302.955	50323	1.45694	16.5583	1.2484	0.829007	2.70741	0.099557	2.40241	0.887345	611.812	14.0223	613.061	12.4609	617.657	26.9544	611.812	14.0223	99.0536
12RKB2317-80	387.016	203301	2.02609	13.0543	0.608776	1.90094	1.17644	0.179978	1.00668	0.855701	1066.86	9.89823	1081.42	7.82779	1110.86	12.1549	1110.86	12.1549	96.0386
12RKB2317-81	127.429	85955	7.16828	13.6651	1.30763	1.69085	1.48441	0.167578	0.702543	0.473283	998.753	6.50014	1005.09	9.47133	1018.9	26.4832	1018.9	26.4832	98.0227
12RKB2317-82	222.764	125179	0.732681	8.91382	0.376895	4.93749	0.75439	0.319204	0.653494	0.866255	1785.84	10.1933	1808.69	6.36993	1835.1	6.8283	1835.1	6.8283	97.3158
12RKB2317-83	186.822	80907.2	2.48737	13.4189	1.46867	1.83787	1.95277	0.178867	1.28698	0.659054	1060.78	12.588	1059.1	12.8418	1055.66	29.5848	1055.66	29.5848	100.486
12RKB2317-84	82.3723	42885.1	0.847609	12.9549	3.50059	1.98751	3.64756	0.186742	1.02497	0.281002	1103.7	10.3972	1111.28	24.6444	1126.11	69.7598	1126.11	69.7598	98.0102
12RKB2317-85	172.917	102495	3.23181	9.26513	0.74057	4.64871	1.19277	0.31238	0.935013	0.783903	1752.41	14.347	1758.06	9.96742	1764.77	13.5336	1764.77	13.5336	99.2992
12RKB2317-86	57.5874	23841.6	1.70547	13.5615	3.57622	1.77234	3.75431	0.174323	1.14259	0.304341	1035.89	10.9339	1035.38	24.375	1034.29	72.2536	1034.29	72.2536	100.155
12RKB2317-87B	100.227	50963.3	0.838155	13.1854	1.80427	1.84389	1.85697	0.17633	0.439266	0.23655	1046.89	4.24466	1061.25	12.2258	1090.88	36.1269	1090.88	36.1269	95.9682
12RKB2317-88	232.243	168211	1.50563	9.33226	0.667028	4.58651	1.30019	0.310433	1.11605	0.858376	1742.84	17.0435	1746.82	10.8392	1751.57	12.2079	1751.57	12.2079	99.5015
12RKB2317-89	176.214	102556	2.29511	12.7598	1.39945	2.08872	1.7577	0.193296	1.06351	0.605058	1139.21	11.1054	1145.11	12.0697	1156.28	27.7655	1156.28	27.7655	98.5232
12RKB2317-90	139.11	21806	1.39049	19.7906	12.0651	0.331654	12.3451	0.047604	2.61462	0.211794	299.795	7.65902	290.828	31.2289	219.425	280.066	299.795	7.65902	NA
12RKB2317-93	93.9019	64315.9	2.24098	10.8111	1.25619	3.31627	1.89509	0.260028	1.41893	0.748739	1489.98	18.8764	1484.89	14.7853	1477.6	23.8238	1477.6	23.8238	100.838
12RKB2317-94	52.9717	27637.8	1.85215	9.73858	1.8767	4.19047	2.13709	0.295976	1.02233	0.478373	1671.33	15.0511	1672.16	17.5207	1673.18	34.6921	1673.18	34.6921	99.889
12RKB2317-95	102.514	47686.1	2.94502	13.3919	3.37251	1.76772	4.16413	0.171694	2.44257	0.586575	1021.44	23.0733	1033.68	27.0115	1059.7	67.8988	1059.7	67.8988	96.3895
12RKB2317-96	147.521	64821.2	3.32053	13.1459	3.41715	1.93303	3.96629	0.184301	2.0136	0.507678	1090.43	20.2003	1092.59	26.5482	1096.92	68.411	1096.92	68.411	99.4081
12RKB2317-97	156.724	89904.9	1.78993	13.6248	1.86059	1.70731	2.04259	0.16871	0.842854	0.412639	1005	7.84342	1011.28	13.0801	1024.88	37.6647	1024.88	37.6647	98.0605
12RKB2317-98	86.0592	42674	2.18214	11.0249	1.33029	3.1404	1.48761	0.251106	0.665809	0.44757	1444.18	8.61452	1442.65	11.4572	1440.38	25.3561	1440.38	25.3561	100.264
12RKB2317-98	120.708	25934.3	1.56035	17.3713	4.94116	0.522998	5.21208	0.0658917	1.65851	0.318205	411.357	6.60927	427.152	18.1756	513.315	108.622	411.357	6.60927	80.1372
12RKB2317-100	30.4246	7482.85	1.34056	19.1082	22.4138	0.495974	22.7926	0.0687349	4.13822	0.18156	428.529	17.1569	408.974	76.8753	299.99	516.912	428.529	17.1569	142.848
17h--Dog Creek Shale, Rebecca K. Bounds Core, Depth 1878 ft. ( 38.48963, -101.97456)
RKB1878-1	372.093	12090	2.21852	19.7231	11.2225	0.085079	11.4806	0.0121701	2.42051	0.210835	77.9802	1.87615	82.9089	9.14042	227.285	260.02	77.9802	1.87615	NA
RKB1878-25	97.6541	35476	0.514294	19.3703	6.16183	0.347161	6.49369	0.0487714	2.04937	0.315594	306.974	6.1436	302.584	16.9931	268.836	141.421	306.974	6.1436	NA
RKB1878-64	152.137	22024.1	0.658863	19.2862	3.89971	0.366644	4.34076	0.0512851	1.90642	0.43919	322.406	5.99524	317.163	11.8251	278.844	89.2846	322.406	5.99524	NA
RKB1878-30	305.164	8852.01	0.553149	17.9346	1.8984	0.401236	7.69716	0.0521904	7.45938	0.969108	327.955	23.8517	342.544	22.3831	442.726	42.233	327.955	23.8517	NA
RKB1878-55	191.408	23615.9	0.880598	18.5927	1.99242	0.401935	3.24221	0.0541995	2.55777	0.788897	340.253	8.4772	343.05	9.43868	362.023	44.9455	340.253	8.4772	NA
RKB1878-46	244.393	66074.5	0.883475	18.8403	4.62826	0.39816	4.8512	0.0544057	1.45375	0.299667	341.514	4.83553	340.313	14.0284	332.11	104.994	341.514	4.83553	NA
RKB1878-99	352.255	70717.5	1.43642	18.4051	1.04052	0.449339	2.01873	0.0599807	1.72991	0.85693	375.508	6.31038	376.816	6.35504	384.846	23.3762	375.508	6.31038	NA
RKB1878-59	375.548	109153	1.76868	18.3542	1.1626	0.46705	1.50644	0.0621725	0.95797	0.635918	388.824	3.61471	389.149	4.8697	391.063	26.0914	388.824	3.61471	NA
RKB1878-79	72.0349	23164.1	1.32546	17.7231	8.53032	0.494542	9.31532	0.0635685	3.74285	0.401795	397.291	14.4211	408.001	31.3084	469.059	189.153	397.291	14.4211	NA
RKB1878-81	239.755	90700.6	1.24572	18.2525	2.18501	0.495138	2.58378	0.0655461	1.379	0.533716	409.266	5.46838	408.406	8.68843	403.524	48.9142	409.266	5.46838	101.423
RKB1878-57	146.331	28892.5	1.03028	17.7147	4.56026	0.512196	5.0409	0.0658065	2.14818	0.426151	410.842	8.55028	419.925	17.3384	470.099	101	410.842	8.55028	87.3947
RKB1878-49	127.079	8728.18	1.75336	18.3375	3.07728	0.515006	3.86379	0.0684938	2.3365	0.604716	427.075	9.65523	421.81	13.3373	393.108	69.0692	427.075	9.65523	108.641
RKB1878-90	507.932	190678	3.12981	18.0908	1.03501	0.522038	1.82048	0.0684951	1.49763	0.822656	427.083	6.18883	426.512	6.34012	423.409	23.0964	427.083	6.18883	100.868
RKB1878-15	201.186	44430	0.986019	18.0775	2.56286	0.525075	2.79573	0.0688427	1.11708	0.399565	429.18	4.63816	428.536	9.77391	425.052	57.2022	429.18	4.63816	100.971
RKB1878-19	83.8368	35941	0.698791	17.7426	4.41777	0.55578	4.75122	0.0715184	1.74853	0.368017	445.297	7.52331	448.776	17.2358	466.621	97.9072	445.297	7.52331	95.43
RKB1878-89	86.1437	17501.9	0.677492	18.0509	5.02319	0.54634	5.73232	0.0715257	2.76171	0.48178	445.341	11.8838	442.596	20.5673	428.33	112.076	445.341	11.8838	103.971
RKB1878-91	487.129	44554.9	1.08593	17.5237	0.625062	0.580392	8.43415	0.0737643	8.41095	0.99725	458.795	37.2482	464.714	31.4606	494.086	13.8001	458.795	37.2482	92.8572
RKB1878-72	192.628	48696.1	1.59697	17.4174	1.89373	0.595169	2.19622	0.0751834	1.11229	0.506455	467.309	5.01389	474.163	8.32051	507.447	41.6725	467.309	5.01389	92.0902
RKB1878-70	176.914	58509	2.22042	17.5674	2.90205	0.592678	3.04115	0.0755133	0.90922	0.298972	469.287	4.11524	472.576	11.4915	488.576	64.0555	469.287	4.11524	96.0518
RKB1878-12	71.9279	16796.4	1.03828	18.1549	4.27848	0.585406	4.51882	0.0770812	1.45407	0.321782	478.677	6.70818	467.929	16.9438	415.517	95.6331	478.677	6.70818	115.2
RKB1878-45	282.837	230136	2.18953	17.0935	2.80001	0.669305	3.45732	0.0829763	2.02806	0.586597	513.864	10.0169	520.29	14.0762	548.624	61.1612	513.864	10.0169	93.664
RKB1878-69	246.021	32169.4	0.757812	17.0747	2.14165	0.721709	2.40495	0.0893746	1.09411	0.454943	551.837	5.78652	551.675	10.2365	550.999	46.7715	551.837	5.78652	100.152
RKB1878-97	283.02	7767.09	1.09086	16.4242	2.21004	0.752215	6.95177	0.0896034	6.59112	0.948121	553.191	34.9412	569.509	30.3116	635.223	47.5531	553.191	34.9412	87.0861
RKB1878-98	80.9122	16984.6	1.08726	16.8857	5.14454	0.73543	5.41495	0.0900656	1.68976	0.312056	555.925	9.00018	559.735	23.3042	575.246	111.918	555.925	9.00018	96.6413
RKB1878-5	239.645	88910.7	1.20524	16.731	0.853783	0.745996	1.26873	0.0905227	0.938468	0.739693	558.628	5.02181	565.899	5.50422	595.211	18.4796	558.628	5.02181	93.8537
RKB1878-80	87.4299	9809.25	0.921647	16.4855	3.88829	0.772453	4.14605	0.0923579	1.43909	0.347099	569.467	7.8436	581.169	18.3489	627.151	83.8162	569.467	7.8436	90.8022
RKB1878-28	303.732	103897	1.90982	16.3573	3.01664	0.789086	3.54977	0.0936127	1.87104	0.527086	576.868	10.3246	590.653	15.8986	644	64.8399	576.868	10.3246	89.5758
RKB1878-93	165.737	66610.4	1.46225	16.5986	2.69685	0.827876	2.89007	0.0996634	1.03899	0.359504	612.436	6.07025	612.433	13.2917	612.401	58.2781	612.436	6.07025	100.006
RKB1878-27	94.6845	25236.6	1.0788	16.6272	3.97269	0.831399	5.35811	0.10026	3.59542	0.671024	615.933	21.1204	614.388	24.7032	608.678	85.9235	615.933	21.1204	101.192
RKB1878-26	176.39	130856	1.05442	16.5867	2.39844	0.837891	2.82115	0.100797	1.48539	0.52652	619.076	8.76797	617.981	13.0601	613.952	51.8162	619.076	8.76797	100.835
RKB1878-73	83.1485	16926.5	0.985002	16.562	6.075	0.85423	6.83859	0.102609	3.14018	0.459185	629.68	18.8381	626.968	32.0001	617.175	131.252	629.68	18.8381	102.026
RKB1878-43	104.847	39542.8	1.45503	16.5065	1.88368	0.870669	3.50139	0.104234	2.95152	0.842957	639.171	17.9602	635.93	16.5488	624.407	40.6412	639.171	17.9602	102.364
RKB1878-9	129.398	49656.1	1.71163	16.37	2.93019	0.878958	3.10942	0.104355	1.04045	0.334611	639.882	6.33789	640.42	14.7704	642.339	63.0076	639.882	6.33789	99.6175
RKB1878-50	80.1669	29068.6	1.13905	14.0337	1.99944	1.607	4.33429	0.163563	3.84555	0.88724	976.547	34.8479	972.939	27.1347	964.818	40.8093	964.818	40.8093	101.216
RKB1878-35	158.919	30417.7	2.94811	13.8757	1.39056	1.59865	2.26579	0.160881	1.7889	0.789524	961.671	15.9816	969.682	14.1541	987.861	28.2933	987.861	28.2933	97.3488
RKB1878-8	344.566	24595.8	0.812506	13.7806	0.523967	1.62565	0.902311	0.162478	0.734591	0.814121	970.532	6.61871	980.178	5.67258	1001.83	10.6188	1001.83	10.6188	96.876
RKB1878-17	129.939	58898.9	2.47058	13.7482	0.69735	1.73425	1.34754	0.172924	1.15307	0.855685	1028.2	10.9588	1021.33	8.67874	1006.61	14.1285	1006.61	14.1285	102.145
RKB1878-6	67.7851	43841.5	1.36037	13.5562	3.02893	1.78446	3.19899	0.175446	1.02913	0.321704	1042.05	9.90213	1039.81	20.8195	1035.09	61.2182	1035.09	61.2182	100.673
RKB1878-68	65.1272	39396.7	1.86189	13.5447	2.23467	1.80798	2.79815	0.177607	1.68401	0.601831	1053.89	16.3728	1048.35	18.2956	1036.8	45.1297	1036.8	45.1297	101.648
RKB1878-53	110.077	69789.2	2.75832	13.4712	1.56156	1.82888	2.80544	0.178686	2.33067	0.830768	1059.79	22.7769	1055.88	18.4183	1047.81	31.4961	1047.81	31.4961	101.143
RKB1878-42	143.41	136930	2.55669	13.4288	1.01334	1.82539	1.2499	0.177783	0.731714	0.585417	1054.85	7.12008	1054.62	8.1996	1054.17	20.4307	1054.17	20.4307	100.065
RKB1878-71	203.362	201927	1.78287	13.3784	0.908048	1.82665	1.31056	0.177239	0.944999	0.721064	1051.87	9.17159	1055.08	8.59967	1061.74	18.2709	1061.74	18.2709	99.0711
RKB1878-38	256.315	177554	2.42171	13.3678	0.43062	1.82497	1.02187	0.176935	0.926705	0.906873	1050.21	8.98092	1054.47	6.70306	1063.33	8.66083	1063.33	8.66083	98.7655
RKB1878-65	64.4644	9050.43	2.3668	13.3658	2.92237	1.78021	3.18672	0.17257	1.2708	0.398779	1026.25	12.0565	1038.25	20.7218	1063.63	58.7971	1063.63	58.7971	96.4862
RKB1878-18	63.5452	103280	2.22902	13.3617	2.34894	1.80714	2.49106	0.175126	0.82939	0.332946	1040.29	7.9679	1048.04	16.2847	1064.25	47.2477	1064.25	47.2477	97.7486
RKB1878-62	213.41	18239.6	1.54417	13.3559	0.913938	1.62892	3.4634	0.157788	3.34064	0.964554	944.47	29.3491	981.443	21.7932	1065.12	18.3604	1065.12	18.3604	88.6727
RKB1878-86	231.68	133581	0.617953	13.3484	0.475449	1.86271	1.652	0.180332	1.5821	0.95769	1068.79	15.582	1067.95	10.915	1066.25	9.55954	1066.25	9.55954	100.238
RKB1878-85	253.295	59701.2	0.83116	13.3106	0.604419	1.92112	2.38678	0.18546	2.30898	0.967404	1096.73	23.2864	1088.46	15.9398	1071.95	12.1227	1071.95	12.1227	102.312
RKB1878-87	588.455	23118.1	6.12215	13.1804	0.655521	1.72191	1.74506	0.164603	1.61726	0.926764	982.305	14.7353	1016.74	11.2097	1091.63	13.1318	1091.63	13.1318	89.985
RKB1878-21	73.2421	40203.4	1.86123	13.0666	2.27666	1.99082	2.99076	0.188666	1.93946	0.648483	1114.15	19.8442	1112.4	20.2167	1108.98	45.47	1108.98	45.47	100.466
RKB1878-82	482.965	127592	1.53678	12.7962	0.338581	2.09421	1.20107	0.194356	1.15236	0.959444	1144.93	12.0885	1146.91	8.25429	1150.66	6.72176	1150.66	6.72176	99.5023
RKB1878-31	178.401	203503	1.49987	12.7487	0.639493	2.1272	1.1327	0.196686	0.934905	0.825381	1157.49	9.90555	1157.68	7.82356	1158	12.6844	1158	12.6844	99.9555
RKB1878-36	135.365	134224	2.25092	12.703	0.937504	2.16021	1.33461	0.199023	0.949875	0.711726	1170.07	10.1639	1168.34	9.2635	1165.12	18.587	1165.12	18.587	100.425
RKB1878-33	42.8278	60756.1	2.29409	12.6451	2.14795	2.2599	2.33896	0.207258	0.925778	0.395807	1214.19	10.2456	1199.88	16.4655	1174.21	42.5086	1174.21	42.5086	103.405
RKB1878-20	270.225	101991	1.86507	12.5974	0.491467	2.09732	1.88472	0.191622	1.81952	0.965403	1130.16	18.8618	1147.93	12.9592	1181.67	9.71538	1181.67	9.71538	95.6403
RKB1878-61	87.6722	66831.4	2.60292	12.5887	1.32291	2.22739	1.69637	0.203364	1.06187	0.625965	1193.37	11.5682	1189.7	11.8882	1183.06	26.1434	1183.06	26.1434	100.872
RKB1878-23	105.067	116882	1.78569	12.5469	1.44232	2.16817	1.90579	0.197301	1.2457	0.653638	1160.81	13.233	1170.89	13.2439	1189.61	28.4778	1189.61	28.4778	97.5788
RKB1878-13	193.175	11130.6	0.901232	12.5414	0.774378	1.88017	4.90406	0.171018	4.84254	0.987454	1017.72	45.5907	1074.12	32.5172	1190.48	15.2682	1190.48	15.2682	85.4882
RKB1878-34	63.249	25142.7	0.890092	12.5113	2.30337	2.08763	2.68338	0.189433	1.3766	0.513009	1118.3	14.1332	1144.75	18.4242	1195.2	45.453	1195.2	45.453	93.5661
RKB1878-101	121.687	65656.3	2.94057	12.3292	1.29024	2.35955	2.07196	0.21099	1.62121	0.782451	1234.09	18.2088	1230.45	14.7772	1224.05	25.3656	1224.05	25.3656	100.82
RKB1878-3	483.886	176136	1.76798	12.3204	0.356177	2.29152	2.18492	0.204762	2.15569	0.986623	1200.85	23.6186	1209.68	15.4463	1225.45	7.01372	1225.45	7.01372	97.9924
RKB1878-100	184.048	170294	1.77267	12.2146	0.564449	2.37177	0.955053	0.210112	0.770405	0.806662	1229.42	8.62311	1234.14	6.82148	1242.4	11.0411	1242.4	11.0411	98.9546
RKB1878-83	132.284	62048.3	1.45685	12.1104	0.996903	2.43716	1.29822	0.214064	0.831608	0.640573	1250.43	9.45233	1253.64	9.34709	1259.17	19.472	1259.17	19.472	99.3062
RKB1878-40	76.4361	28701.5	1.6023	12.0781	2.22106	2.46539	3.06622	0.215964	2.11391	0.689417	1260.51	24.2029	1261.94	22.1532	1264.39	43.3784	1264.39	43.3784	99.6939
RKB1878-2	110.069	111188	2.85512	11.8555	0.925697	2.60593	2.38873	0.224068	2.20207	0.921858	1303.33	25.9852	1302.31	17.5301	1300.6	17.9887	1300.6	17.9887	100.21
RKB1878-96	202.785	224841	2.69935	11.7099	0.606516	2.80145	1.00264	0.237921	0.798384	0.796285	1375.88	9.8917	1355.92	7.50265	1324.57	11.7459	1324.57	11.7459	103.874
RKB1878-41	152.205	81782.1	1.64587	11.6744	1.00148	2.70103	2.59845	0.228698	2.3977	0.922743	1327.67	28.7695	1328.74	19.2576	1330.45	19.3796	1330.45	19.3796	99.7907
RKB1878-14	117.31	23049.1	2.83464	11.6349	1.27941	2.69978	2.46649	0.227819	2.10871	0.854945	1323.06	25.2228	1328.4	18.2771	1337	24.7351	1337	24.7351	98.9574
RKB1878-60	57.4091	57909.4	1.23886	11.5495	1.42613	2.74425	1.85976	0.229872	1.19368	0.641845	1333.83	14.3825	1340.53	13.8412	1351.23	27.5185	1351.23	27.5185	98.7122
RKB1878-52	36.9443	8312.09	0.527547	11.277	2.93784	2.88435	4.32925	0.235906	3.17987	0.734507	1365.38	39.1278	1377.83	32.6529	1397.16	56.3378	1397.16	56.3378	97.725
RKB1878-88	384.959	63476.8	1.86447	11.1191	1.13738	2.87636	1.73383	0.23196	1.30864	0.754767	1344.77	15.8839	1375.74	13.0641	1424.13	21.7265	1424.13	21.7265	94.427
RKB1878-94	31.2007	34097.8	1.21718	10.9424	2.4354	3.17266	3.133	0.251788	1.97092	0.629084	1447.69	25.5561	1450.53	24.1927	1454.67	46.3353	1454.67	46.3353	99.5202
RKB1878-78	143.186	226708	1.87603	10.9311	0.607336	3.29665	1.87973	0.261358	1.77892	0.946366	1496.79	23.7615	1480.26	14.6453	1456.64	11.5504	1456.64	11.5504	102.756
RKB1878-51	131.825	10124.5	2.40047	10.9092	1.25868	3.20326	2.18557	0.253445	1.78674	0.817518	1456.22	23.2895	1457.95	16.9138	1460.45	23.9261	1460.45	23.9261	99.7104
RKB1878-54	93.0299	27964.7	1.96933	10.8642	1.2991	3.26462	1.60568	0.257234	0.943688	0.587718	1475.68	12.4469	1472.66	12.4814	1468.31	24.6685	1468.31	24.6685	100.502
RKB1878-11	92.4559	154594	1.32624	10.8111	0.636098	3.18511	1.27131	0.249743	1.10073	0.865823	1437.15	14.1798	1453.55	9.82452	1477.6	12.0634	1477.6	12.0634	97.2621
RKB1878-7	84.4939	69277.6	4.09843	10.5517	1.14132	3.41432	1.67613	0.261291	1.22753	0.732357	1496.44	16.3931	1507.7	13.1645	1523.52	21.5115	1523.52	21.5115	98.2228
RKB1878-66	68.6376	121448	1.16541	10.4895	1.19783	3.47223	1.9915	0.264156	1.591	0.798895	1511.07	21.4314	1520.93	15.7011	1534.66	22.5436	1534.66	22.5436	98.4631
RKB1878-29	204.368	309727	1.48035	10.0057	0.313221	4.08214	1.3722	0.296233	1.33598	0.9736	1672.6	19.682	1650.74	11.192	1623.01	5.82588	1623.01	5.82588	103.056
RKB1878-92	74.8817	192283	1.04408	9.95475	0.921888	4.06716	1.60835	0.293644	1.31792	0.819424	1659.71	19.2848	1647.74	13.1088	1632.5	17.1296	1632.5	17.1296	101.667
RKB1878-77	51.2954	83725.5	1.24168	9.92897	1.54054	3.99508	2.26998	0.287692	1.66719	0.734453	1629.99	24.0116	1633.2	18.4366	1637.32	28.6075	1637.32	28.6075	99.5523
RKB1878-56	269.093	396529	1.89082	9.86921	0.371368	4.05154	1.60772	0.290002	1.56424	0.972956	1641.54	22.6691	1644.61	13.0937	1648.52	6.88673	1648.52	6.88673	99.5767
RKB1878-58	56.4871	50902.3	0.90937	9.33617	0.985007	4.5177	1.44288	0.305904	1.05436	0.730731	1720.52	15.9214	1734.23	11.9961	1750.8	18.0303	1750.8	18.0303	98.2703
RKB1878-76	116.745	224162	1.03685	9.24267	0.684747	4.79117	1.37581	0.321173	1.19331	0.867347	1795.45	18.7004	1783.35	11.558	1769.21	12.5047	1769.21	12.5047	101.483
RKB1878-32	83.7212	87190.2	2.27174	9.11064	0.465095	4.8623	0.809592	0.321284	0.662666	0.818518	1796	10.3874	1795.75	6.8183	1795.44	8.46722	1795.44	8.46722	100.031
RKB1878-74	294.632	513630	1.65266	9.09312	0.130211	4.85745	0.834279	0.320347	0.824055	0.987745	1791.42	12.8886	1794.91	7.02503	1798.94	2.3695	1798.94	2.3695	99.5819
RKB1878-22	102.67	122274	2.13725	8.4771	0.507219	5.38833	2.009	0.331284	1.94391	0.967604	1844.6	31.1837	1883	17.2075	1925.61	9.08816	1925.61	9.08816	95.7932
RKB1878-95	172.681	115842	4.75646	7.58112	0.459173	5.65909	2.06138	0.311156	2.00959	0.974875	1746.39	30.7434	1925.15	17.7895	2123.49	8.04388	2123.49	8.04388	82.2418
RKB1878-24	278.093	187199	2.83013	7.33579	0.786823	7.15653	1.7565	0.380757	1.57042	0.89406	2079.82	27.9169	2131.11	15.6499	2180.93	13.694	2180.93	13.694	95.3641
RKB1878-39	145.906	251288	1.30273	7.13592	0.241062	7.77797	1.28001	0.402546	1.2571	0.982106	2180.75	23.2589	2205.66	11.5168	2228.87	4.17191	2228.87	4.17191	97.8409
RKB1878-63	80.2749	257185	0.766288	5.42893	1.66726	13.2899	4.59165	0.523281	4.27826	0.931748	2713.08	94.7483	2700.46	43.3866	2691.02	27.5539	2691.02	27.5539	100.82
RKB1878-75	37.196	51227.8	0.670129	5.33322	0.634002	13.782	1.01395	0.533091	0.791293	0.780403	2754.46	17.7374	2734.84	9.59931	2720.38	10.4496	2720.38	10.4496	101.253
17i--Whitehorse Sandstone, Rebecca K. Bounds Core, Depth 1763 ft. ( 38.48963, -101.97456)
504-12-RKB-1763-1	262.088	59674	0.507331	16.4612	2.67622	0.855375	2.98969	0.102121	1.3327	0.445766	626.83	7.96048	627.595	13.9961	630.376	57.6519	626.83	7.96048	99.4374
504-12-RKB-1763-2	173.31	126488	4.96222	13.6042	1.52048	1.77945	2.06085	0.175574	1.39113	0.675029	1042.75	13.3936	1037.98	13.3976	1027.93	30.7682	1027.93	30.7682	101.442
504-12-RKB-1763-3	815.672	72668.8	6.76897	18.2519	0.875193	0.428517	1.51542	0.0567252	1.23715	0.816373	355.679	4.28109	362.123	4.61582	403.589	19.5979	355.679	4.28109	NA
504-12-RKB-1763-4	949.841	97158.3	3.81069	18.901	1.1119	0.353088	3.71521	0.0484023	3.54492	0.954164	304.705	10.5503	307.041	9.84428	324.847	25.2512	304.705	10.5503	NA
504-12-RKB-1763-5	218.248	110710	5.69297	9.86934	0.556586	4.06842	1.43312	0.291214	1.32063	0.921502	1647.59	19.2005	1648	11.6812	1648.49	10.3215	1648.49	10.3215	99.9454
504-12-RKB-1763-6	144.224	250514	1.99153	10.2353	0.885598	3.78568	1.48952	0.281025	1.19766	0.804058	1596.52	16.9372	1589.71	11.9646	1580.68	16.5661	1580.68	16.5661	101.002
504-12-RKB-1763-7	364.053	55774	1.49744	16.4738	1.55782	0.828459	2.04978	0.0989838	1.33222	0.64993	608.451	7.73509	612.757	9.43053	628.685	33.548	608.451	7.73509	96.7815
504-12-RKB-1763-8	80.6064	75303.4	1.94342	10.8285	2.53856	3.18505	5.5542	0.250141	4.94013	0.88944	1439.2	63.723	1453.54	42.9463	1474.55	48.1682	1474.55	48.1682	97.6028
504-12-RKB-1763-9	315.389	59348.8	4.09846	14.7741	1.66858	0.926336	6.44376	0.0992587	6.22398	0.965892	610.063	36.2293	665.705	31.4735	858.935	34.6231	610.063	36.2293	71.0255
504-12-RKB-1763-10	163.579	1447.65	1.79687	16.5537	11.5625	0.559257	11.8653	0.0671438	2.66349	0.224476	418.925	10.8032	451.042	43.2381	618.247	250.348	418.925	10.8032	67.7601
504-12-RKB-1763-11	181.226	83287.2	2.79713	10.7358	0.68115	2.95437	2.35197	0.230038	2.25118	0.957145	1334.7	27.1401	1395.97	17.8441	1490.84	12.8949	1490.84	12.8949	89.5265
504-12-RKB-1763-12	162.963	51464.2	1.64038	10.6658	1.02948	3.45489	1.60399	0.267254	1.23003	0.766853	1526.85	16.7222	1516.98	12.6314	1503.23	19.4557	1503.23	19.4557	101.571
504-12-RKB-1763-13	401.508	55537	1.39906	17.739	2.83622	0.544883	3.15814	0.0701022	1.38912	0.439854	436.771	5.8663	441.639	11.3106	467.105	62.8437	436.771	5.8663	93.506
504-12-RKB-1763-14	164.959	10831	0.925195	18.8321	5.67729	0.391779	5.93594	0.0535105	1.73313	0.291972	336.038	5.67478	335.668	16.968	333.103	128.814	336.038	5.67478	NA
504-12-RKB-1763-15	310.902	225331	2.7626	9.12512	0.361277	4.96189	0.756629	0.328386	0.664806	0.878641	1830.55	10.5943	1812.85	6.39414	1792.55	6.57952	1792.55	6.57952	102.12
504-12-RKB-1763-16	79.253	54047.5	2.28153	12.3625	2.18397	2.25269	2.45094	0.20198	1.11239	0.453862	1185.95	12.05	1197.63	17.2371	1218.74	42.923	1218.74	42.923	97.3092
504-12-RKB-1763-17	336.244	478840	1.68099	4.56797	0.39278	17.6213	5.94904	0.583795	5.93606	0.997818	2964.21	141.074	2969.29	57.2222	2972.72	6.32944	2972.72	6.32944	99.7138
504-12-RKB-1763-18	33.4894	12581.5	1.1846	13.0469	6.74819	1.8864	7.0241	0.178502	1.94935	0.277523	1058.78	19.0336	1076.32	46.6449	1111.99	134.914	1111.99	134.914	95.2156
504-12-RKB-1763-20	184.127	27388.9	0.781316	9.97777	2.41615	3.70618	3.7836	0.2682	2.91167	0.769551	1531.66	39.6951	1572.7	30.2636	1628.2	44.9258	1628.2	44.9258	94.0704
504-12-RKB-1763-21	557.766	44776.2	1.14209	10.157	0.34779	3.11109	2.70592	0.229181	2.68348	0.991706	1330.2	32.2539	1435.44	20.7951	1595.03	6.49419	1595.03	6.49419	83.3966
504-12-RKB-1763-22	72.1299	76033.4	2.28698	5.31594	0.527273	14.0335	2.68438	0.541059	2.63209	0.980519	2787.88	59.574	2751.97	25.449	2725.73	8.68607	2725.73	8.68607	102.28
504-12-RKB-1763-24	151.006	162862	1.17037	12.7351	0.819292	2.0745	1.48066	0.191608	1.23333	0.832962	1130.08	12.7843	1140.42	10.1447	1160.13	16.2642	1160.13	16.2642	97.4102
504-12-RKB-1763-25	367.348	204034	1.75199	14.1466	1.06873	1.3999	4.59267	0.143632	4.4666	0.972548	865.167	36.1629	888.896	27.2085	948.429	21.8687	948.429	21.8687	91.221
504-12-RKB-1763-26	357.301	38603.3	1.2493	17.8491	2.3008	0.545698	2.68046	0.0706427	1.37521	0.51305	440.026	5.84938	442.174	9.60904	453.347	51.0858	440.026	5.84938	97.0616
504-12-RKB-1763-27	226.339	50558.5	2.36211	16.4535	3.69311	0.777257	3.80714	0.0927519	0.924775	0.242906	571.792	5.06006	583.918	16.9076	631.377	79.5785	571.792	5.06006	90.5626
504-12-RKB-1763-28	333.728	137242	4.14329	10.2562	0.884746	2.74132	3.14743	0.203914	3.02052	0.959678	1196.31	32.9803	1339.74	23.4206	1576.86	16.5585	1576.86	16.5585	75.8669
504-12-RKB-1763-29	506.514	330332	9.20908	13.4717	0.591868	1.8454	1.08952	0.180307	0.914738	0.839579	1068.65	9.00809	1061.79	7.17496	1047.73	11.9529	1047.73	11.9529	101.997
504-12-RKB-1763-31	94.4071	26440.6	2.85871	13.765	3.73786	1.66041	3.98245	0.165764	1.37418	0.345059	988.73	12.5963	993.533	25.2428	1004.13	75.9007	1004.13	75.9007	98.4659
504-12-RKB-1763-32	181.308	113673	3.24296	12.6983	1.07965	2.07887	1.96195	0.191456	1.63818	0.834973	1129.26	16.9696	1141.86	13.4518	1165.86	21.4086	1165.86	21.4086	96.8604
504-12-RKB-1763-33	344.453	121990	9.88739	13.0467	0.672397	1.97652	0.895966	0.187026	0.592147	0.660903	1105.24	6.01435	1107.53	6.04114	1112.02	13.4095	1112.02	13.4095	99.3908
504-12-RKB-1763-34	145.806	9508.23	3.59317	12.2873	1.29678	1.98845	2.06526	0.177202	1.60738	0.778295	1051.67	15.5975	1111.6	13.9541	1230.78	25.4708	1230.78	25.4708	85.4477
504-12-RKB-1763-35	60.9103	33306.2	4.80406	11.9984	3.33495	2.48365	3.82834	0.216129	1.87997	0.491066	1261.39	21.5379	1267.28	27.7207	1277.27	65.0176	1277.27	65.0176	98.7568
504-12-RKB-1763-36	296.234	161341	4.3701	11.926	1.31362	1.923	3.80528	0.166332	3.57135	0.938525	991.868	32.8327	1089.11	25.4248	1289.06	25.5504	1289.06	25.5504	76.945
504-12-RKB-1763-37	145.298	209692	1.65323	9.78823	0.386329	4.1172	1.45383	0.292284	1.40156	0.964047	1652.93	20.4352	1657.72	11.8777	1663.78	7.14852	1663.78	7.14852	99.348
504-12-RKB-1763-38	57.8872	27618.5	1.13313	10.7203	2.14507	2.76986	3.97572	0.21536	3.3474	0.841959	1257.31	38.2376	1347.45	29.669	1493.58	40.5962	1493.58	40.5962	84.1812
504-12-RKB-1763-39	147.538	58871.6	3.25095	13.5974	1.80624	1.73919	2.00336	0.171514	0.866552	0.43255	1020.45	8.17836	1023.16	12.9162	1028.95	36.5412	1028.95	36.5412	99.1741
504-12-RKB-1763-40	78.516	58250.4	4.2633	10.0586	1.63795	3.80558	4.78049	0.277623	4.49113	0.93947	1579.38	62.913	1593.92	38.4578	1613.19	30.5133	1613.19	30.5133	97.9041
504-12-RKB-1763-41	51.2381	31772.9	0.612962	11.5607	4.93601	2.58849	5.47876	0.217035	2.37754	0.433955	1266.19	27.3322	1297.39	40.1489	1349.35	95.3021	1349.35	95.3021	93.8367
504-12-RKB-1763-42	66.3165	17468.2	2.0115	15.9675	6.67756	0.864713	7.69325	0.10014	3.82051	0.496605	615.229	22.4182	632.693	36.2397	695.603	142.445	615.229	22.4182	88.4454
504-12-RKB-1763-43	122.539	36302.1	0.811182	13.6423	1.67616	1.73826	3.47932	0.17199	3.04896	0.876309	1023.06	28.8437	1022.82	22.4303	1022.27	33.9285	1022.27	33.9285	100.077
504-12-RKB-1763-44	555.202	24063	3.22493	10.7614	0.446562	2.86097	2.21296	0.223296	2.16743	0.979428	1299.27	25.5045	1371.7	16.6517	1486.33	8.45895	1486.33	8.45895	87.4146
504-12-RKB-1763-45	94.1894	63880.3	1.28553	8.59718	0.999035	5.14318	3.89541	0.320691	3.76513	0.966554	1793.1	58.938	1843.27	33.1265	1900.36	17.9565	1900.36	17.9565	94.3558
504-12-RKB-1763-46	95.4759	6787.52	1.15252	18.4153	8.82162	0.480695	9.2342	0.0642018	2.72939	0.295574	401.128	10.6147	398.55	30.4483	383.603	198.554	401.128	10.6147	104.569
504-12-RKB-1763-47	316.933	35073	1.68124	18.0441	2.14354	0.50205	2.42769	0.0657025	1.13969	0.469456	410.212	4.5295	413.089	8.23938	429.174	47.7889	410.212	4.5295	95.5817
504-12-RKB-1763-48	170.862	44356.8	1.9245	11.5975	1.62479	2.71461	2.08153	0.228334	1.30108	0.625061	1325.76	15.5912	1332.46	15.4469	1343.23	31.3869	1343.23	31.3869	98.6997
504-12-RKB-1763-49	89.0145	68519.9	2.86925	6.0609	0.69156	10.4504	2.00359	0.459376	1.88046	0.938544	2436.8	38.1582	2475.53	18.5695	2507.46	11.6312	2507.46	11.6312	97.1821
504-12-RKB-1763-50	409.027	78759.1	1.44281	17.6595	2.58404	0.573454	3.80576	0.0734471	2.79402	0.734155	456.89	12.3237	460.246	14.0846	477.03	57.1417	456.89	12.3237	95.778
504-12-RKB-1763-51	295.936	49536.7	1.62786	17.6047	2.65	0.556932	2.96051	0.0711096	1.31991	0.445837	442.837	5.64879	449.527	10.7534	483.918	58.5269	442.837	5.64879	91.5108
504-12-RKB-1763-52	178.321	228647	2.01926	9.3586	0.599515	4.39393	1.94007	0.298238	1.84512	0.951057	1682.56	27.3246	1711.2	16.0484	1746.41	10.9791	1746.41	10.9791	96.3442
504-12-RKB-1763-53	138.937	122221	2.17551	12.7799	2.14907	2.06143	2.62069	0.191071	1.49984	0.572306	1127.17	15.5103	1136.09	17.9199	1153.16	42.6609	1153.16	42.6609	97.7464
504-12-RKB-1763-54	526.279	55127.7	4.82556	18.3305	2.12478	0.447872	3.71449	0.0595425	3.04676	0.820236	372.843	11.0374	375.788	11.6673	393.96	47.6446	372.843	11.0374	NA
504-12-RKB-1763-56	92.8889	61513.2	1.64171	10.6948	1.73592	3.33693	2.33377	0.258833	1.55982	0.668372	1483.87	20.6751	1489.74	18.2347	1498.08	32.8316	1498.08	32.8316	99.0516
504-12-RKB-1763-57	201.86	186399	1.74052	12.7989	1.63279	2.06967	1.87098	0.192121	0.913542	0.488268	1132.85	9.49077	1138.82	12.8095	1150.2	32.4246	1150.2	32.4246	98.492
504-12-RKB-1763-58	235.59	42706.2	1.65695	10.6374	0.644495	3.57669	3.46268	0.27594	3.40217	0.982526	1570.88	47.4315	1544.37	27.4839	1508.26	12.1711	1508.26	12.1711	104.152
504-12-RKB-1763-60B	183.447	24251.8	1.95819	17.4554	3.43012	0.635289	3.6121	0.0804266	1.13204	0.313402	498.669	5.43231	499.385	14.2493	502.691	75.5307	498.669	5.43231	99.2
504-12-RKB-1763-61	115.26	85920.9	1.9157	9.89144	0.939366	4.03641	2.07644	0.28957	1.85181	0.891819	1639.38	26.8057	1641.56	16.8991	1644.34	17.4295	1644.34	17.4295	99.6981
504-12-RKB-1763-62	190.474	35674.3	3.24466	18.1406	4.21552	0.462749	4.53001	0.0608829	1.65843	0.366098	380.993	6.1354	386.168	14.5524	417.278	94.2088	380.993	6.1354	NA
504-12-RKB-1763-63	18.1318	6739.9	1.54519	13.4178	8.66272	1.82111	9.78855	0.177222	4.55774	0.465619	1051.78	44.2316	1053.08	64.2455	1055.81	174.773	1055.81	174.773	99.6181
504-12-RKB-1763-64	321.197	50308.1	1.90754	17.7882	3.75265	0.525033	3.99606	0.0677356	1.37337	0.343681	422.499	5.61642	428.508	13.97	460.929	83.2316	422.499	5.61642	91.6626
504-12-RKB-1763-65	92.6443	64107.9	1.26567	9.84856	0.861777	3.99975	1.51867	0.285696	1.25048	0.823405	1619.99	17.9128	1634.15	12.3367	1652.4	15.9716	1652.4	15.9716	98.0383
504-12-RKB-1763-66	393.352	68092	3.30896	18.5161	3.20674	0.475987	3.71894	0.063921	1.88344	0.506445	399.427	7.29464	395.316	12.1782	371.323	72.2298	399.427	7.29464	NA
504-12-RKB-1763-67	887.383	177155	2.96056	18.4597	1.48857	0.417035	1.78804	0.0558338	0.990576	0.554001	350.239	3.37682	353.929	5.34323	378.183	33.4829	350.239	3.37682	NA
504-12-RKB-1763-69	142.385	28007.2	1.48478	17.8245	6.25294	0.61363	6.35755	0.0793271	1.1486	0.180668	492.105	5.44198	485.847	24.5531	456.456	138.832	492.105	5.44198	107.81
504-12-RKB-1763-70	172.764	310668	2.19526	5.32865	0.351423	13.5716	0.90608	0.524504	0.835155	0.921723	2718.25	18.5228	2720.29	8.56901	2721.79	5.79131	2721.79	5.79131	99.87
504-12-RKB-1763-72	656.191	41353	0.682499	7.96035	0.208922	6.10469	6.16497	0.352447	6.16143	0.999426	1946.27	103.517	1990.92	53.8376	2037.57	3.69354	2037.57	3.69354	95.5193
504-12-RKB-1763-73	245.037	30877.4	2.33375	16.7669	2.3812	0.719503	2.67705	0.0874951	1.22329	0.456957	540.706	6.34462	550.373	11.3745	590.596	51.664	540.706	6.34462	91.5525
504-12-RKB-1763-75	154.52	69514.3	1.8513	10.7932	0.969311	3.24258	1.59817	0.253829	1.27067	0.795074	1458.19	16.5826	1467.4	12.4033	1480.74	18.3751	1480.74	18.3751	98.4772
504-12-RKB-1763-76	102.96	84090.2	2.93023	13.63	1.17449	1.77646	2.2717	0.17561	1.94452	0.855979	1042.95	18.7249	1036.89	14.7596	1024.11	23.784	1024.11	23.784	101.839
504-12-RKB-1763-77	193.062	188128	2.4932	11.6192	0.690843	2.71209	0.976153	0.22855	0.689644	0.706492	1326.89	8.2705	1331.77	7.2417	1339.6	13.3518	1339.6	13.3518	99.0512
504-12-RKB-1763-78	137.095	61427.9	3.1458	14.362	4.20026	1.51119	4.42456	0.15741	1.39089	0.314356	942.366	12.1942	934.919	27.0422	917.426	86.4086	917.426	86.4086	102.719
504-12-RKB-1763-79	205.476	63865	1.35927	10.0637	0.697014	3.89127	1.29695	0.28402	1.09373	0.843311	1611.58	15.5958	1611.87	10.477	1612.24	12.9846	1612.24	12.9846	99.9591
504-12-RKB-1763-80	131.855	40023.6	2.59726	13.9147	3.22751	1.26376	6.52141	0.127537	5.66675	0.868945	773.796	41.3202	829.593	36.9826	982.185	65.7396	773.796	41.3202	78.7832
504-12-RKB-1763-81	156.032	22713.6	1.64279	18.4401	6.24845	0.476606	6.44504	0.0637413	1.57967	0.245099	398.338	6.10198	395.741	21.1258	380.579	140.602	398.338	6.10198	NA
504-12-RKB-1763-82	98.5272	36297.8	2.26058	13.6271	1.7188	1.75654	1.92667	0.173605	0.870505	0.451819	1031.94	8.30098	1029.58	12.4667	1024.54	34.7979	1024.54	34.7979	100.723
504-12-RKB-1763-83	294.378	214084	1.12608	11.3759	0.848815	2.65498	1.4334	0.219051	1.15506	0.805815	1276.86	13.3797	1316.03	10.5728	1380.4	16.3122	1380.4	16.3122	92.4991
504-12-RKB-1763-84	100.163	115758	1.86167	6.03691	0.755413	10.8149	1.3684	0.473516	1.141	0.833818	2498.96	23.6366	2507.35	12.7192	2514.12	12.6971	2514.12	12.6971	99.397
504-12-RKB-1763-85	348.891	82183.8	5.71646	17.7607	1.71606	0.604255	1.90545	0.0778356	0.828161	0.434628	483.191	3.85531	479.93	7.28754	464.373	38.0246	483.191	3.85531	104.052
504-12-RKB-1763-86	162.045	16009.1	0.969447	17.9214	8.21534	0.559735	8.43906	0.0727535	1.93028	0.228731	452.723	8.43902	451.354	30.7602	444.364	182.938	452.723	8.43902	101.881
504-12-RKB-1763-87	281.554	315910	3.13147	8.54679	0.32054	5.52613	0.952296	0.342549	0.896729	0.941649	1898.92	14.7493	1904.67	8.18798	1910.92	5.75456	1910.92	5.75456	99.3719
504-12-RKB-1763-88	101.671	90877.1	1.71195	12.3694	2.28358	2.33083	3.46494	0.209101	2.60597	0.752097	1224.03	29.0525	1221.73	24.6246	1217.67	44.8953	1217.67	44.8953	100.522
504-12-RKB-1763-90	229.676	141376	5.50908	13.2888	0.978091	1.86613	2.38584	0.179856	2.17614	0.912105	1066.19	21.3846	1069.16	15.7744	1075.25	19.6388	1075.25	19.6388	99.1575
504-12-RKB-1763-90B	325.683	193012	3.04518	11.5292	0.716387	2.70437	1.40414	0.226133	1.20764	0.860057	1314.2	14.3576	1329.66	10.4089	1354.63	13.8172	1354.63	13.8172	97.0154
504-12-RKB-1763-91	325.059	240363	5.87061	10.9237	0.474042	2.96879	1.44129	0.235207	1.3611	0.944364	1361.73	16.7078	1399.67	10.9476	1457.92	9.01379	1457.92	9.01379	93.4021
504-12-RKB-1763-92	435.067	128483	2.2161	17.9996	2.27527	0.523945	2.42	0.0683988	0.824348	0.34064	426.502	3.40208	427.784	8.44834	434.672	50.6969	426.502	3.40208	98.1203
504-12-RKB-1763-93	139.218	30526.8	0.454474	16.6245	3.34981	0.792912	4.04117	0.0956032	2.2605	0.559368	588.59	12.7158	592.822	18.1489	609.031	72.4135	588.59	12.7158	96.6437
504-12-RKB-1763-94	401.979	379106	2.12564	9.5548	0.313831	4.31406	1.15294	0.298956	1.1094	0.962241	1686.13	16.4597	1696.05	9.50405	1708.32	5.77398	1708.32	5.77398	98.7008
504-12-RKB-1763-95	418.302	31946.3	6.54195	16.5527	1.38715	0.808292	2.57698	0.0970363	2.17179	0.842764	597.017	12.3837	601.495	11.6966	618.389	29.9426	597.017	12.3837	96.5439
504-12-RKB-1763-96	230.182	30058	115.105	18.1856	7.90624	0.511616	8.10734	0.0674795	1.79453	0.221347	420.953	7.31277	419.536	27.8689	411.731	177.049	420.953	7.31277	102.24
504-12-RKB-1763-98	277.815	34510.6	1.63898	18.343	6.16735	0.41627	6.24117	0.0553787	0.957104	0.153353	347.459	3.23751	353.38	18.6283	392.441	138.488	347.459	3.23751	NA
504-12-RKB-1763-98B	99.777	71502.9	2.26041	11.7647	1.67007	2.6124	2.37641	0.222905	1.69062	0.711417	1297.21	19.8652	1304.13	17.4517	1315.52	32.3875	1315.52	32.3875	98.6083
504-12-RKB-1763-99	147.719	25856.3	1.5128	17.7695	5.92592	0.534289	6.0443	0.0688573	1.19035	0.196938	429.268	4.94337	434.652	21.3751	463.302	131.445	429.268	4.94337	92.6539
504-12-RKB-1763-100	737.417	16078.6	1.38385	17.6695	1.29181	0.54731	2.22591	0.0701386	1.81271	0.814367	436.991	7.65884	443.233	7.99471	475.793	28.5882	436.991	7.65884	91.8448
504-12-RKB-1763-100B	169.201	125061	2.3826	9.80196	0.634778	4.05432	0.931243	0.288224	0.681375	0.731683	1632.65	9.82749	1645.17	7.58502	1661.19	11.7508	1661.19	11.7508	98.2819
17i--Big Basin Formation Rebecca K. Bounds Core, Depth 1651 ft. ( 38.48963, -101.97456)
RKB-BB-2_Run2-Spot 156	712.38	111058	1.27798	18.7548	1.62438	0.400964	2.39868	0.0545401	1.76495	0.735801	342.335	5.88443	342.347	6.97089	342.412	36.7548	342.335	5.88443	NA
RKB-BB-2_Run2-Spot 176	419.454	56619.3	2.91269	17.8854	1.48596	0.464556	2.33583	0.0602609	1.80223	0.771558	377.212	6.60315	387.422	7.52335	448.836	33.0345	377.212	6.60315	NA
RKB-BB-2_Run2-Spot 208	408.694	70041.2	1.04454	17.7039	2.65313	0.478698	7.50463	0.0614654	7.02	0.935422	384.531	26.2049	397.179	24.6733	471.459	58.7429	384.531	26.2049	NA
RKB-BB-2_Run2-Spot 158	402.023	228746	1.69673	17.8008	1.26421	0.51672	4.5243	0.0667103	4.34408	0.960167	416.306	17.5131	422.958	15.6518	459.379	28.0361	416.306	17.5131	90.6236
RKB-BB-2_Run2-Spot 177	297.084	1.47556e+06	1.53635	17.3692	1.38875	0.545955	2.32597	0.0687759	1.86588	0.802196	428.777	7.74021	442.343	8.34072	513.548	30.5034	428.777	7.74021	83.493
RKB-BB-2_Run2-Spot 159	289.219	76804.8	1.86444	17.4284	1.99462	0.551341	6.25332	0.0696909	5.92667	0.947765	434.293	24.8914	445.875	22.5697	506.071	43.871	434.293	24.8914	85.8167
RKB-BB-2_Run2-Spot 162	323.472	159155	1.3924	17.1099	1.81067	0.581894	2.43709	0.0722086	1.63123	0.669334	449.448	7.08178	465.678	9.1029	546.494	39.5811	449.448	7.08178	82.2421
RKB-BB-2_Run2-Spot 193	276.214	100666	22.9751	16.8008	1.51197	0.621109	4.50016	0.0756827	4.23856	0.941869	470.301	19.2243	490.542	17.5088	586.226	32.8128	470.301	19.2243	80.2253
RKB-BB-2_Run2-Spot 165	299.651	85456	1.18127	17.0694	2.19214	0.69175	6.86144	0.085638	6.50184	0.947591	529.688	33.0628	533.851	28.4952	551.66	47.8611	529.688	33.0628	96.0171
RKB-BB-2_Run2-Spot 136	148.137	55564.7	1.12845	15.7587	1.8608	0.829326	2.60575	0.0947858	1.82411	0.700032	583.779	10.1808	613.238	11.9955	723.568	39.4566	583.779	10.1808	80.6806
RKB-BB-2_Run2-Spot 190	303.366	210493	1.63472	16.7468	1.94876	0.805984	6.72779	0.0978945	6.43937	0.95713	602.058	37.0138	600.199	30.4962	593.203	42.2517	602.058	37.0138	101.493
RKB-BB-2_Run2-Spot 197	630.675	64197.1	4.4138	16.7394	2.05544	0.822996	9.16447	0.0999162	8.931	0.974524	613.918	52.3003	609.718	42.0337	594.159	44.5577	613.918	52.3003	103.326
RKB-BB-2_Run2-Spot 157	82.6559	183320	1.17266	15.4176	1.54243	0.942301	2.38057	0.105367	1.81329	0.761705	645.787	11.1426	674.086	11.7274	769.805	32.4574	645.787	11.1426	83.8896
RKB-BB-2_Run2-Spot 143	442.338	94416.2	1.48101	16.1404	1.92843	0.915397	7.26886	0.107157	7.00839	0.964166	656.218	43.7276	659.923	35.2876	672.605	41.2481	656.218	43.7276	97.5636
RKB-BB-2_Run2-Spot 114	196.593	67645.8	1.39692	14.0772	2.6215	1.55209	6.45373	0.158464	5.89732	0.913785	948.238	52.0034	951.324	39.8735	958.45	53.588	958.45	53.588	98.9345
RKB-BB-2_Run2-Spot 122	246.508	131047	3.78451	14.027	1.03391	1.50887	2.12368	0.153503	1.855	0.873487	920.572	15.9134	933.984	12.9693	965.784	21.1073	965.784	21.1073	95.3186
RKB-BB-2_Run2-Spot 192	132.599	76415.4	2.92356	13.9851	2.22894	1.53845	8.58681	0.156045	8.29247	0.965722	934.76	72.1598	945.885	52.8895	971.851	45.4488	971.851	45.4488	96.1835
RKB-BB-2_Run2-Spot 164	382.64	92551.5	2.16243	13.4725	1.13426	1.75086	5.93661	0.17108	5.82725	0.981578	1018.06	54.8788	1027.48	38.3847	1047.61	22.8885	1047.61	22.8885	97.1788
RKB-BB-2_Run2-Spot 161	408.453	162915	3.0981	13.4091	1.22102	1.82077	1.6293	0.177074	1.07877	0.662104	1050.97	10.4616	1052.96	10.6791	1057.12	24.6025	1057.12	24.6025	99.418
RKB-BB-2_Run2-Spot 168	110.288	43835.8	1.99074	13.3137	1.84681	1.80388	7.70176	0.174182	7.47706	0.970825	1035.11	71.5048	1046.86	50.3528	1071.48	37.1061	1071.48	37.1061	96.6058
RKB-BB-2_Run2-Spot 113	143.27	138090	2.10495	13.1353	2.65668	1.80552	6.96321	0.172006	6.43649	0.924356	1023.15	60.8967	1047.46	45.5323	1098.52	53.1486	1098.52	53.1486	93.1391
RKB-BB-2_Run2-Spot 163	83.1372	40988.1	2.72971	13.1179	2.2283	1.90677	7.38011	0.18141	7.03567	0.953329	1074.67	69.6468	1083.46	49.1949	1101.15	44.5746	1101.15	44.5746	97.5958
RKB-BB-2_Run2-Spot 202	95.4549	49880.8	3.50228	13.1167	2.50919	1.82532	7.44042	0.173645	7.00456	0.94142	1032.16	66.8097	1054.6	48.8465	1101.33	50.176	1101.33	50.176	93.7193
RKB-BB-2_Run2-Spot 181	132.147	67528.1	1.81046	13.0581	1.4894	1.86056	4.26811	0.176207	3.99981	0.937137	1046.22	38.6279	1067.19	28.1949	1110.28	29.7623	1110.28	29.7623	94.2305
RKB-BB-2_Run2-Spot 121	307.62	896335	2.93593	13.043	1.42296	2.05599	2.40501	0.19449	1.93889	0.806185	1145.65	20.3511	1134.29	16.4306	1112.59	28.3964	1112.59	28.3964	102.972
RKB-BB-2_Run2-Spot 152	285.282	95710.9	5.16394	12.9868	2.22537	2.08817	7.62034	0.196682	7.28816	0.956409	1157.47	77.2224	1144.92	52.3665	1121.25	44.3661	1121.25	44.3661	103.231
RKB-BB-2_Run2-Spot 206	56.6285	54746.2	2.27885	12.8345	2.64328	1.92863	3.25507	0.179525	1.89962	0.583588	1064.38	18.6382	1091.07	21.7691	1144.7	52.5574	1144.7	52.5574	92.9837
RKB-BB-2_Run2-Spot 132	107.053	2.32018e+06	1.71815	12.6815	2.23769	1.96388	6.77086	0.180628	6.3904	0.94381	1070.4	63.0277	1103.21	45.5847	1168.48	44.3154	1168.48	44.3154	91.6063
RKB-BB-2_Run2-Spot 123	66.8079	37864.1	2.20798	12.5592	2.36986	1.95573	8.41156	0.178143	8.07081	0.959491	1056.82	78.6734	1100.42	56.5717	1187.68	46.8267	1187.68	46.8267	88.9819
RKB-BB-2_Run2-Spot 167	33.8155	71631.2	2.71996	12.3815	2.56422	2.04401	7.24556	0.183551	6.77665	0.935282	1086.35	67.7516	1130.3	49.4404	1215.76	50.4609	1215.76	50.4609	89.3554
RKB-BB-2_Run2-Spot 182	272.517	66626.7	2.44524	12.3734	1.6052	2.36803	6.6757	0.212508	6.47984	0.97066	1242.17	73.2137	1233.01	47.6933	1217.02	31.5585	1217.02	31.5585	102.066
RKB-BB-2_Run2-Spot 153	302.597	385981	2.97023	12.3263	1.84946	2.43129	6.1232	0.217354	5.83722	0.953295	1267.88	67.1877	1251.9	44.0819	1224.52	36.325	1224.52	36.325	103.541
RKB-BB-2_Run2-Spot 116	287.069	56839.4	3.14575	12.285	1.39212	2.41789	2.49785	0.215431	2.07394	0.830292	1257.69	23.6971	1247.93	17.944	1231.15	27.3392	1231.15	27.3392	102.156
RKB-BB-2_Run2-Spot 201	165.844	97614.6	2.32816	11.7627	2.81659	2.53718	8.90682	0.21645	8.44976	0.948683	1263.09	96.9299	1282.76	64.9589	1315.85	54.6235	1315.85	54.6235	95.9902
RKB-BB-2_Run2-Spot 207	79.9424	159603	2.18933	11.7569	2.11715	2.54543	5.81953	0.217047	5.42076	0.931477	1266.25	62.3215	1285.13	42.4486	1316.8	41.0508	1316.8	41.0508	96.1611
RKB-BB-2_Run2-Spot 216	155.244	421125	3.00394	11.5366	1.05287	2.84694	1.92174	0.238208	1.60765	0.836561	1377.37	19.9377	1368	14.4416	1353.38	20.3095	1353.38	20.3095	101.773
RKB-BB-2_Run2-Spot 124	126.177	64059.1	1.31996	11.4666	1.29977	2.69505	6.44348	0.22413	6.31102	0.979444	1303.66	74.4921	1327.1	47.7548	1365.12	25.0318	1365.12	25.0318	95.4983
RKB-BB-2_Run2-Spot 196	135.029	64060.9	2.96	11.3425	1.18972	2.94554	3.90726	0.24231	3.72173	0.952516	1398.7	46.7964	1393.7	29.6268	1386.04	22.8459	1386.04	22.8459	100.913
RKB-BB-2_Run2-Spot 171	56.7178	117964	1.34141	11.2439	2.21486	2.70292	2.89216	0.220419	1.85983	0.64306	1284.09	21.6538	1329.26	21.4391	1402.79	42.4367	1402.79	42.4367	91.5381
RKB-BB-2_Run2-Spot 126	168.996	82869.8	2.26847	11.0345	1.35328	3.15969	2.20164	0.25287	1.73663	0.788787	1453.26	22.5952	1447.37	16.9825	1438.71	25.8	1438.71	25.8	101.011
RKB-BB-2_Run2-Spot 117	257.204	226282	2.75101	10.8512	2.59218	3.27043	7.87572	0.257384	7.43691	0.944283	1476.45	98.1428	1474.05	61.317	1470.57	49.2121	1470.57	49.2121	100.399
RKB-BB-2_Run2-Spot 191	477.488	261887	4.02883	10.8451	1.41723	3.29234	4.55742	0.258963	4.33145	0.950419	1484.53	57.4365	1479.24	35.5088	1471.64	26.8998	1471.64	26.8998	100.876
RKB-BB-2_Run2-Spot 217	391.484	70372.2	2.70016	10.785	2.26887	3.36924	8.17378	0.263542	7.85258	0.960703	1507.94	105.591	1497.27	64.0848	1482.19	43.0053	1482.19	43.0053	101.737
RKB-BB-2_Run2-Spot 138	148.925	97650.1	3.21427	10.6919	1.31715	3.47035	6.78231	0.269109	6.65318	0.980961	1536.28	90.9506	1520.5	53.5107	1498.59	24.9085	1498.59	24.9085	102.515
RKB-BB-2_Run2-Spot 112	118.004	99137.1	1.74102	10.6891	1.11134	3.32504	3.55655	0.257772	3.37845	0.949925	1478.43	44.6352	1486.95	27.7698	1499.1	21.0146	1499.1	21.0146	98.6216
RKB-BB-2_Run2-Spot 173	84.5539	181536	1.59374	10.4286	1.80486	3.05973	9.03867	0.231425	8.85664	0.979861	1341.96	107.307	1422.67	69.2778	1545.6	33.9199	1545.6	33.9199	86.8249
RKB-BB-2_Run2-Spot 128	274.295	188760	2.41304	10.3927	2.18368	3.68482	6.8372	0.277745	6.47911	0.947626	1579.99	90.7954	1568.08	54.6576	1552.07	41.0066	1552.07	41.0066	101.799
RKB-BB-2_Run2-Spot 172	135.375	118863	1.43182	9.93903	1.41941	3.79513	2.76185	0.273571	2.3692	0.85783	1558.9	32.8073	1591.72	22.1986	1635.43	26.3656	1635.43	26.3656	95.3204
RKB-BB-2_Run2-Spot 186	85.1918	217066	0.882776	9.9194	1.78735	4.02778	3.47079	0.289768	2.9752	0.85721	1640.37	43.0902	1639.82	28.2397	1639.1	33.1842	1639.1	33.1842	100.077
RKB-BB-2_Run2-Spot 125	105.712	125776	1.47146	9.83355	1.53316	3.98045	6.07246	0.283884	5.87572	0.967603	1610.9	83.7567	1630.22	49.3173	1655.23	28.4068	1655.23	28.4068	97.3217
RKB-BB-2_Run2-Spot 133	310.973	205219	3.8214	9.5346	2.01151	4.62419	6.57329	0.31977	6.25795	0.952027	1788.6	97.7513	1753.65	54.9303	1712.22	37.0015	1712.22	37.0015	104.461
RKB-BB-2_Run2-Spot 179	310.436	150483	3.77409	9.25476	1.95787	4.75273	8.05587	0.319012	7.81434	0.970017	1784.9	121.848	1776.59	67.679	1766.82	35.7697	1766.82	35.7697	101.023
RKB-BB-2_Run2-Spot 218	276.579	188953	1.52253	9.22573	1.85027	4.84375	8.53348	0.324102	8.33047	0.976211	1809.73	131.464	1792.53	71.9403	1772.56	33.7793	1772.56	33.7793	102.097
RKB-BB-2_Run2-Spot 178	251.94	166775	2.36409	9.13648	1.58804	4.9123	5.73019	0.325509	5.50574	0.960831	1816.58	87.1647	1804.37	48.3789	1790.28	28.9271	1790.28	28.9271	101.469
RKB-BB-2_Run2-Spot 188	47.0842	46364.6	0.893959	9.0918	2.01731	4.61668	8.77213	0.304424	8.53702	0.973198	1713.21	128.452	1752.29	73.3397	1799.21	36.7088	1799.21	36.7088	95.2201
RKB-BB-2_Run2-Spot 146	120.88	103687	3.22567	8.68985	2.12257	5.47872	6.86925	0.345295	6.5331	0.951063	1912.09	108.106	1897.27	59.0498	1881.07	38.2426	1881.07	38.2426	101.649
RKB-BB-2_Run2-Spot 174	138.817	151682	2.12894	7.8691	2.07198	6.56183	6.91137	0.374497	6.59347	0.954004	2050.53	115.82	2054.23	60.9696	2057.94	36.5661	2057.94	36.5661	99.6397
RKB-BB-2_Run2-Spot 187	89.0667	50278.6	2.40369	7.72205	1.32716	6.6076	2.44723	0.370062	2.0561	0.840176	2029.69	35.8016	2060.36	21.5857	2091.17	23.3304	2091.17	23.3304	97.0604
RKB-BB-2_Run2-Spot 142	220.919	80248.9	1.57843	6.81148	1.21012	8.92825	5.68273	0.441069	5.55239	0.977064	2355.42	109.562	2330.69	51.9349	2309.09	20.7739	2309.09	20.7739	102.006
RKB-BB-2_Run2-Spot 147	27.3138	165718	1.53637	5.25083	1.65775	13.7639	7.43709	0.524163	7.24998	0.974841	2716.81	160.761	2733.6	70.5132	2746	27.2568	2746	27.2568	98.937
RKB-BB-2_Run2-Spot 194	30.563	106193	1.72257	5.13687	1.97867	14.6969	7.25384	0.547551	6.97876	0.962078	2814.98	159.208	2795.82	69.0683	2782.02	32.4279	2782.02	32.4279	101.185
17k--Entrada Sandstone, Rebecca K. Bounds Core, Depth 1628 ft. ( 38.48963, -101.97456)
RKB_BB_1_1_SILT_97 <>	351.589	9114.61	0.807598	20.216	13.2994	0.169859	13.5328	0.0249048	2.50244	0.184917	158.58	3.91996	159.297	19.9539	169.946	311.734	158.58	3.91996	NA
RKB_BB_1_1_SILT_92 <>	106.171	7886.26	0.290806	21.7297	15.0991	0.211632	15.4276	0.0333529	3.1667	0.205262	211.499	6.58886	194.921	27.3681	-1.31096	365.782	211.499	6.58886	NA
RKB_BB_1_1_SILT_71 <>	160.278	12748.4	1.17711	18.7713	15.3123	0.247628	15.7187	0.0337126	3.5511	0.225916	213.742	7.46574	224.647	31.6885	340.46	348.511	213.742	7.46574	NA
RKB_BB_1_1_SILT_95 <>	126.326	12897.3	0.806331	22.984	23.8415	0.210973	23.9701	0.0351684	2.47916	0.103427	222.815	5.42955	194.369	42.4272	-138.406	597.31	222.815	5.42955	NA
RKB_BB_1_1_SILT_89 <>	360.899	27575.3	1.77494	20.359	4.39992	0.260215	5.06566	0.0384228	2.51031	0.495554	243.049	5.9877	234.84	10.6211	153.482	103.074	243.049	5.9877	NA
RKB_BB_1_1_SILT_6 <>	185.649	13205.4	1.21219	20.6835	10.2753	0.256858	10.9464	0.0385316	3.77393	0.344764	243.725	9.02629	232.132	22.7186	116.325	242.849	243.725	9.02629	NA
RKB_BB_1_1_SILT_51 <>	59.0767	6194.69	1.46158	18.625	33.3565	0.287604	33.661	0.0388498	4.51752	0.134206	245.7	10.8907	256.672	76.4875	358.106	772.492	245.7	10.8907	NA
RKB_BB_1_1_SILT_78 <>	296.363	18822.2	4.06491	19.5235	8.1785	0.337195	8.4558	0.047746	2.14772	0.253994	300.669	6.30926	295.044	21.654	250.737	188.456	300.669	6.30926	NA
RKB_BB_1_1_SILT_24 <>	219.135	11858	0.522615	18.9557	6.11914	0.353875	6.46587	0.0486507	2.08893	0.32307	306.232	6.2474	307.631	17.1621	318.231	139.23	306.232	6.2474	NA
RKB_BB_1_1_SILT_83 <>	275.726	3999.5	1.98004	18.2414	6.1557	0.374856	7.57837	0.0495931	4.4203	0.583278	312.023	13.4639	323.246	20.9834	404.884	137.923	312.023	13.4639	NA
RKB_BB_1_1_SILT_81 <>	135.996	13756.4	7.25627	19.5189	5.91818	0.369496	6.33675	0.0523074	2.26486	0.357416	328.672	7.25737	319.28	17.3615	251.281	136.24	328.672	7.25737	NA
RKB_BB_1_1_SILT_38 <>	338.095	9689.86	7.89554	17.5108	3.5649	0.414671	5.44951	0.0526632	4.12173	0.756349	330.851	13.2928	352.233	16.2208	495.681	78.604	330.851	13.2928	NA
RKB_BB_1_1_SILT_29 <>	190.061	20331.1	0.918113	18.5945	9.11727	0.428349	9.21924	0.0577673	1.36743	0.148324	362.033	4.8141	362.003	28.0801	361.793	206.021	362.033	4.8141	NA
RKB_BB_1_1_SILT_34 <>	185.822	3523.82	2.63466	18.4733	8.10556	0.450787	8.15975	0.0603968	0.938857	0.11506	378.038	3.44718	377.83	25.7494	376.535	182.605	378.038	3.44718	NA
RKB_BB_1_1_SILT_113 <>	297.709	35660.5	0.952042	18.06	6.06437	0.47415	6.83831	0.062106	3.16006	0.462112	388.42	11.9119	394.052	22.3369	427.209	135.335	388.42	11.9119	NA
RKB_BB_1_1_SILT_115 <>	260.362	11258.9	1.1882	17.9674	5.42341	0.477883	7.32187	0.0622739	4.91899	0.671821	389.439	18.5894	396.62	24.0445	438.663	120.776	389.439	18.5894	NA
RKB_BB_1_1_SILT_12 <>	249.557	27832.4	1.50574	18.1556	6.17279	0.485803	6.2457	0.063969	0.951504	0.152345	399.718	3.68781	402.046	20.7381	415.425	138.05	399.718	3.68781	NA
RKB_BB_1_1_SILT_19 <>	249.542	40440.3	3.05493	18.5106	5.01951	0.479256	5.18654	0.0643408	1.30564	0.251737	401.97	5.08801	397.562	17.0637	371.992	113.07	401.97	5.08801	108.059
RKB_BB_1_1_SILT_65 <>	65.2259	7759.96	2.60091	18.1649	19.094	0.493977	19.4087	0.0650785	3.48096	0.179351	406.437	13.7111	407.617	65.2509	414.286	430.254	406.437	13.7111	98.1053
RKB_BB_1_1_SILT_49 <>	267.143	21556.4	1.68166	18.1552	8.29131	0.499131	8.43695	0.0657227	1.56087	0.185004	410.334	6.2052	411.114	28.5302	415.471	185.534	410.334	6.2052	98.7637
RKB_BB_1_1_SILT_8 <>	255.284	25937.6	3.14515	17.4244	5.79892	0.523256	5.87952	0.0661257	0.970198	0.165013	412.772	3.87918	427.324	20.5103	506.606	127.67	412.772	3.87918	81.4779
RKB_BB_1_1_SILT_104 <>	183.299	20438.6	1.69789	17.7221	8.91377	0.516605	9.21566	0.0664008	2.33946	0.253857	414.435	9.39046	422.881	31.8849	469.183	197.682	414.435	9.39046	88.3313
RKB_BB_1_1_SILT_17 <>	413.26	53217.2	1.79077	18.5905	2.55827	0.492885	2.80341	0.0664561	1.14645	0.408949	414.769	4.60538	406.875	9.39828	362.29	57.6963	414.769	4.60538	114.485
RKB_BB_1_1_SILT_54 <>	262.031	32114.1	1.82176	18.1459	2.77961	0.505805	3.13391	0.0665673	1.44746	0.461871	415.442	5.82369	415.624	10.6892	416.617	62.1079	415.442	5.82369	99.7178
RKB_BB_1_1_SILT_109 <>	70.7233	6144.08	0.634484	18.7893	14.8881	0.491589	15.2246	0.0669901	3.18303	0.209072	417.996	12.8828	405.993	50.9908	338.245	338.876	417.996	12.8828	123.578
RKB_BB_1_1_SILT_11 <>	109.31	16844.9	1.50263	17.9894	14.5071	0.528908	14.9518	0.0690072	3.61947	0.242075	430.172	15.0618	431.085	52.5668	435.945	324.512	430.172	15.0618	98.6756
RKB_BB_1_1_SILT_37 <>	391.086	2515.01	0.623032	17.2287	4.9568	0.555273	7.94267	0.0693836	6.20613	0.781366	432.441	25.9576	448.445	28.8013	531.399	108.651	432.441	25.9576	81.3778
RKB_BB_1_1_SILT_15 <>	342.583	50950.1	1.02787	18.2168	2.91842	0.532597	3.10412	0.0703673	1.05754	0.34069	438.368	4.48181	433.532	10.9536	407.897	65.3098	438.368	4.48181	107.47
RKB_BB_1_1_SILT_59 <>	497.233	2462.59	0.885376	15.746	3.03035	0.619622	7.17524	0.0707615	6.50392	0.90644	440.742	27.7077	489.61	27.8797	725.267	64.2794	440.742	27.7077	60.7696
RKB_BB_1_1_SILT_16 <>	186.799	16258.6	1.3626	17.4507	4.19645	0.560316	4.3823	0.0709162	1.26267	0.288129	441.673	5.39009	451.732	15.9804	503.25	92.4156	441.673	5.39009	87.7641
RKB_BB_1_1_SILT_98 <>	61.4062	725.983	1.03749	17.8156	18.2327	0.556388	18.6955	0.0718915	4.13398	0.221122	447.541	17.8737	449.173	67.9633	457.557	407.484	447.541	17.8737	97.811
RKB_BB_1_1_SILT_116 <>	117.277	17070.8	0.977241	16.9642	6.71485	0.590061	6.9527	0.0725986	1.80301	0.259325	451.792	7.86697	470.907	26.2037	565.147	146.387	451.792	7.86697	79.9425
RKB_BB_1_1_SILT_30 <>	122.267	17508.1	0.696971	17.728	6.35193	0.580443	6.67595	0.0746308	2.05459	0.30776	463.995	9.19819	464.746	24.9006	468.48	140.763	463.995	9.19819	99.0427
RKB_BB_1_1_SILT_50 <>	589.116	2962.75	4.95639	15.5382	2.70452	0.666478	6.19393	0.075108	5.57229	0.899636	466.857	25.0951	518.569	25.1577	753.377	57.1033	466.857	25.0951	61.9685
RKB_BB_1_1_SILT_63 <>	99.8258	11835.6	0.987606	17.0762	12.3461	0.607379	12.5093	0.075223	2.01434	0.161027	467.546	9.08456	481.906	48.0319	550.803	270.478	467.546	9.08456	84.8845
RKB_BB_1_1_SILT_33 <>	282.362	10617.5	1.23691	16.4485	2.99376	0.712605	6.21664	0.0850107	5.44831	0.876407	525.962	27.5183	546.292	26.2709	632.038	64.4687	525.962	27.5183	83.2169
RKB_BB_1_1_SILT_118 <>	175.369	22585.4	2.36114	17.2335	6.52443	0.690323	6.64778	0.0862828	1.27467	0.191744	533.515	6.52676	532.994	27.5737	530.786	143.078	533.515	6.52676	100.514
RKB_BB_1_1_SILT_55 <>	72.2922	11849.7	1.34788	17.506	5.75849	0.692435	6.49651	0.0879152	3.00739	0.462923	543.195	15.6667	534.262	26.9947	496.278	126.983	543.195	15.6667	109.454
RKB_BB_1_1_SILT_5 <>	67.6016	11770.6	1.91575	18.5807	12.2493	0.673113	13.0232	0.0907085	4.42226	0.339569	559.726	23.7085	522.603	53.2484	363.478	277.149	559.726	23.7085	153.992
RKB_BB_1_1_SILT_101 <>	179.388	3190.99	0.742673	16.2437	4.22165	0.798435	5.41476	0.0940642	3.39076	0.626207	579.529	18.7931	595.946	24.4139	658.955	90.5263	579.529	18.7931	87.9466
RKB_BB_1_1_SILT_90 <>	115.318	34733.4	1.13746	17.2291	6.32328	0.775617	6.39427	0.0969191	0.950221	0.148605	596.328	5.41225	582.98	28.3682	531.339	138.636	596.328	5.41225	112.231
RKB_BB_1_1_SILT_102 <>	131.758	28490.8	1.2531	16.8079	6.00059	0.799522	6.39018	0.0974635	2.1971	0.343825	599.527	12.5783	596.559	28.8359	585.312	130.324	599.527	12.5783	102.429
RKB_BB_1_1_SILT_66 <>	89.0452	7725.56	2.09367	16.0133	8.34176	0.848705	9.01906	0.0985681	3.42905	0.3802	606.012	19.8336	623.938	42.0657	689.5	178.23	606.012	19.8336	87.8916
RKB_BB_1_1_SILT_3 <>	218.397	3821.62	1.01796	16.2992	2.80219	0.839309	3.02055	0.0992171	1.12757	0.373301	609.819	6.56094	618.764	13.9962	651.645	60.1554	609.819	6.56094	93.5814
RKB_BB_1_1_SILT_64 <>	248.147	33804	1.6642	16.2588	2.84426	0.850245	3.14175	0.100261	1.33445	0.424749	615.938	7.83896	624.784	14.6604	656.946	61.0031	615.938	7.83896	93.7578
RKB_BB_1_1_SILT_39 <>	141.515	41647.5	0.906008	16.4901	5.92006	0.846172	5.98737	0.1012	0.895261	0.149525	621.439	5.30375	622.546	27.8716	626.551	127.686	621.439	5.30375	99.1841
RKB_BB_1_1_SILT_41 <>	129.73	30963.3	1.13482	16.1966	5.2419	0.862312	5.88683	0.101295	2.67906	0.455093	621.992	15.8849	631.384	27.6842	665.183	112.319	621.992	15.8849	93.5069
RKB_BB_1_1_SILT_88 <>	266.43	70871.5	0.794177	16.3851	1.47398	0.859453	2.20311	0.102134	1.6374	0.74322	626.903	9.78156	629.824	10.3399	640.347	31.7213	626.903	9.78156	97.9004
RKB_BB_1_1_SILT_72 <>	556.013	260553	2.25685	16.1493	1.28953	0.909432	1.68739	0.106518	1.0883	0.64496	652.492	6.75354	656.755	8.1606	671.405	27.5839	652.492	6.75354	97.183
RKB_BB_1_1_SILT_103 <>	294.573	52801.8	1.6211	15.6988	1.28657	0.940186	5.44034	0.107048	5.28602	0.971634	655.582	32.9506	672.98	26.7748	731.677	27.2566	655.582	32.9506	89.5999
RKB_BB_1_1_SILT_94 <>	188.846	58614	0.991301	15.9213	5.21479	0.932378	5.97063	0.107664	2.90764	0.48699	659.164	18.2188	668.885	29.2597	701.792	111.106	659.164	18.2188	93.9258
RKB_BB_1_1_SILT_10 <>	152.319	51099.1	1.79196	14.4732	2.59961	1.48561	2.76802	0.155944	0.950749	0.343477	934.197	8.2683	924.525	16.8	901.503	53.6104	901.503	53.6104	103.627
RKB_BB_1_1_SILT_14 <>	231.961	20455.9	0.923604	14.0126	1.6867	1.46316	5.71669	0.148699	5.46219	0.955482	893.664	45.582	915.311	34.4937	967.875	34.4137	967.875	34.4137	92.3327
RKB_BB_1_1_SILT_85 <>	98.3474	29684.6	2.02074	13.9121	2.8612	1.65402	3.11832	0.166891	1.23993	0.397627	994.958	11.4319	991.091	19.7352	982.56	58.2535	982.56	58.2535	101.262
RKB_BB_1_1_SILT_4 <>	77.1094	14813.4	1.64194	13.8541	4.87172	1.66488	5.19779	0.167287	1.81201	0.348611	997.143	16.7403	995.238	32.9843	991.061	99.1285	991.061	99.1285	100.614
RKB_BB_1_1_SILT_35 <>	415.308	141620	4.80078	13.7152	0.808859	1.64445	1.05875	0.163578	0.683149	0.645243	976.628	6.19102	987.423	6.6852	1011.48	16.3945	1011.48	16.3945	96.5547
RKB_BB_1_1_SILT_58 <>	34.0428	15806	1.67378	13.7056	7.4316	1.35495	9.70227	0.134685	6.23741	0.642881	814.539	47.7282	869.695	56.7409	1012.9	150.805	1012.9	150.805	80.4163
RKB_BB_1_1_SILT_87 <>	176.601	1953.02	1.0106	13.5535	5.70843	1.42776	6.0008	0.140347	1.85025	0.308334	846.627	14.6797	900.612	35.8483	1035.48	115.375	1035.48	115.375	81.7615
RKB_BB_1_1_SILT_111 <>	100.656	13515.7	2.27786	13.5472	2.47228	1.52922	12.2136	0.150251	11.9607	0.979299	902.368	100.725	942.183	75.1185	1036.43	49.9546	1036.43	49.9546	87.0654
RKB_BB_1_1_SILT_26 <>	455.445	94151.7	12.0024	13.4923	1.00894	1.61731	3.61862	0.158263	3.47512	0.960344	947.116	30.61	976.949	22.7083	1044.62	20.3714	1044.62	20.3714	90.6664
RKB_BB_1_1_SILT_67 <>	41.5558	35378.8	1.09464	13.4082	7.68421	1.67396	8.13534	0.162785	2.67146	0.328378	972.237	24.1093	998.692	51.7573	1057.26	154.944	1057.26	154.944	91.9582
RKB_BB_1_1_SILT_7 <>	131.836	50844.9	1.36945	13.3735	2.46247	1.78568	2.70379	0.173199	1.11657	0.412965	1029.72	10.6262	1040.25	17.6003	1062.48	49.5457	1062.48	49.5457	96.9165
RKB_BB_1_1_SILT_86 <>	224.9	85435	3.10281	13.3705	0.97672	1.83126	1.71533	0.177581	1.41009	0.822055	1053.75	13.708	1056.73	11.2659	1062.92	19.6563	1062.92	19.6563	99.1373
RKB_BB_1_1_SILT_114 <>	323.194	15312.5	1.24851	13.2924	1.34281	1.79317	1.64799	0.172872	0.955381	0.579724	1027.92	9.07757	1042.98	10.743	1074.7	26.9658	1074.7	26.9658	95.6472
RKB_BB_1_1_SILT_93 <>	267.495	179339	2.37303	13.1837	1.29418	1.84539	1.44114	0.176451	0.634023	0.439946	1047.56	6.13018	1061.79	9.49061	1091.13	25.925	1091.13	25.925	96.0065
RKB_BB_1_1_SILT_56 <>	159.74	88587.5	1.4212	13.106	1.66862	1.97178	2.29342	0.187425	1.57337	0.686036	1107.41	16.0092	1105.92	15.4521	1102.98	33.3671	1102.98	33.3671	100.402
RKB_BB_1_1_SILT_9 <>	62.6723	13903.7	7.94387	13.0025	6.37495	2.01294	6.78789	0.189826	2.33141	0.343466	1120.43	23.9779	1119.88	46.079	1118.83	127.281	1118.83	127.281	100.143
RKB_BB_1_1_SILT_69 <>	140.232	45729.4	0.690951	12.8468	1.83134	2.04402	1.93092	0.190449	0.612069	0.316984	1123.81	6.3123	1130.3	13.1661	1142.79	36.4271	1142.79	36.4271	98.3394
RKB_BB_1_1_SILT_108 <>	99.5642	45471.2	1.9771	12.8324	3.1811	2.09269	3.46916	0.194764	1.38406	0.398962	1147.13	14.5446	1146.41	23.8398	1145.06	63.2488	1145.06	63.2488	100.181
RKB_BB_1_1_SILT_40 <>	186.036	32872.9	0.983067	12.5134	3.88344	2.0312	4.09205	0.184343	1.28988	0.315217	1090.66	12.9425	1126.02	27.8495	1194.88	76.6229	1194.88	76.6229	91.2775
RKB_BB_1_1_SILT_32 <>	447.534	14654.2	2.49368	12.3752	0.88619	2.03676	1.55492	0.182807	1.27767	0.821696	1082.29	12.7296	1127.88	10.5897	1216.76	17.4325	1216.76	17.4325	88.9486
RKB_BB_1_1_SILT_60 <>	99.9476	28864.3	3.43543	12.2868	1.83867	2.23846	2.10203	0.199475	1.01873	0.484639	1172.5	10.9213	1193.18	14.754	1230.85	36.1059	1230.85	36.1059	95.2593
RKB_BB_1_1_SILT_61 <>	243.966	43764.7	4.171	12.2462	1.01234	2.27996	2.18528	0.202501	1.93665	0.886226	1188.74	21.0239	1206.1	15.4252	1237.35	19.85	1237.35	19.85	96.0714
RKB_BB_1_1_SILT_105 <>	128.281	56442.5	1.36665	12.1902	2.14778	2.25623	3.3401	0.199478	2.55799	0.765842	1172.51	27.4234	1198.73	23.5037	1246.32	42.0635	1246.32	42.0635	94.0778
RKB_BB_1_1_SILT_45 <>	32.7709	27333.2	1.09507	12.0132	5.14978	2.5275	5.45504	0.220216	1.79925	0.329833	1283.01	20.9326	1279.98	39.7076	1274.88	100.482	1274.88	100.482	100.638
RKB_BB_1_1_SILT_70 <>	147.452	43884.7	1.93165	12.0118	1.87592	2.45015	2.00591	0.213452	0.710348	0.354128	1247.18	8.05504	1257.47	14.4652	1275.09	36.5699	1275.09	36.5699	97.8112
RKB_BB_1_1_SILT_46 <>	172.09	116077	1.73185	11.6843	1.46218	2.60892	1.78489	0.221086	1.02366	0.573514	1287.61	11.9479	1303.15	13.1024	1328.81	28.3015	1328.81	28.3015	96.8994
RKB_BB_1_1_SILT_107 <>	30.1322	21041.4	1.89919	11.517	7.23974	2.52678	7.70877	0.21106	2.64788	0.343489	1234.46	29.7481	1279.77	56.1366	1356.66	139.748	1356.66	139.748	90.9927
RKB_BB_1_1_SILT_75 <>	105.468	12858.5	1.60339	11.0994	3.45752	2.95295	5.81088	0.237713	4.67031	0.80372	1374.8	57.8242	1395.6	44.1041	1427.53	66.0345	1427.53	66.0345	96.3064
RKB_BB_1_1_SILT_21 <>	128.086	46746.2	1.0387	11.0382	1.73841	3.0725	1.84528	0.245974	0.618858	0.335374	1417.68	7.87569	1425.86	14.1368	1438.08	33.1463	1438.08	33.1463	98.5814
RKB_BB_1_1_SILT_27 <>	136.987	72628	7.12899	10.8342	1.7999	3.13626	1.98356	0.246437	0.833575	0.420242	1420.08	10.6243	1441.63	15.2726	1473.56	34.1554	1473.56	34.1554	96.3705
RKB_BB_1_1_SILT_119 <>	52.5442	46754.4	0.869747	10.6004	2.81557	3.40058	3.5659	0.261442	2.18819	0.613643	1497.21	29.2357	1504.53	27.9867	1514.83	53.1402	1514.83	53.1402	98.837
RKB_BB_1_1_SILT_36 <>	295.462	9219.07	1.46545	10.4309	0.929196	2.90446	9.18497	0.219727	9.13785	0.99487	1280.43	106.126	1383.07	69.4847	1545.2	17.4645	1545.2	17.4645	82.8653
RKB_BB_1_1_SILT_80 <>	164.473	63914.8	1.28894	10.2209	1.21068	3.83437	1.51192	0.284238	0.905625	0.598989	1612.67	12.9212	1599.99	12.1768	1583.32	22.6404	1583.32	22.6404	101.854
RKB_BB_1_1_SILT_110 <>	128.58	103165	1.90092	9.89332	1.0802	4.24787	3.04605	0.304798	2.84809	0.93501	1715.06	42.8892	1683.32	25.0405	1643.99	20.0418	1643.99	20.0418	104.323
RKB_BB_1_1_SILT_120 <>	101.584	158240	1.86986	9.84616	1.99263	4.06693	2.09991	0.290424	0.66259	0.315533	1643.65	9.61309	1647.7	17.1156	1652.85	36.9316	1652.85	36.9316	99.443
RKB_BB_1_1_SILT_43 <>	157.64	71946	1.11184	9.61478	1.21846	4.40688	1.61967	0.307304	1.06709	0.65883	1727.43	16.17	1713.63	13.405	1696.8	22.4561	1696.8	22.4561	101.805
RKB_BB_1_1_SILT_73 <>	287.105	151162	2.62634	9.6127	0.627484	4.14585	1.30339	0.28904	1.1424	0.876486	1636.73	16.5131	1663.39	10.6629	1697.2	11.5627	1697.2	11.5627	96.4372
RKB_BB_1_1_SILT_106 <>	90.9431	16993.6	1.20424	9.0908	1.81598	5.0089	2.04402	0.33025	0.938199	0.458998	1839.59	15.0149	1820.83	17.3023	1799.41	33.0434	1799.41	33.0434	102.233
RKB_BB_1_1_SILT_100 <>	90.3818	109562	1.02662	9.01834	0.850776	5.08903	2.21988	0.332859	2.05038	0.923643	1852.22	33.009	1834.28	18.8407	1813.96	15.4519	1813.96	15.4519	102.11
RKB_BB_1_1_SILT_20 <>	18.5366	9653.56	0.729173	9.00683	8.28263	5.08286	8.61363	0.332031	2.3649	0.274553	1848.22	38.0015	1833.25	73.2096	1816.28	150.655	1816.28	150.655	101.759
RKB_BB_1_1_SILT_117 <>	116.782	74733.1	0.773085	8.97168	1.06788	4.91213	2.04389	0.319626	1.74273	0.852653	1787.9	27.2108	1804.34	17.2446	1823.37	19.3734	1823.37	19.3734	98.0549
RKB_BB_1_1_SILT_57 <>	184.253	114917	1.01993	8.64181	0.584796	5.43496	0.955196	0.340643	0.755257	0.790683	1889.76	12.3709	1890.38	8.19185	1891.05	10.5217	1891.05	10.5217	99.9319
RKB_BB_1_1_SILT_42 <>	150.939	31553	0.934561	8.58417	0.763484	5.33476	1.75393	0.332133	1.57904	0.900286	1848.71	25.3792	1874.45	14.9989	1903.08	13.7177	1903.08	13.7177	97.1429
RKB_BB_1_1_SILT_79 <>	22.2475	20491.4	1.34918	8.48304	7.12379	6.04617	7.40403	0.371989	2.01776	0.272521	2038.75	35.2672	1982.52	64.5968	1924.35	127.843	1924.35	127.843	105.945
RKB_BB_1_1_SILT_112 <>	179.919	191790	0.917412	8.02722	0.693541	6.12778	1.55339	0.356752	1.38997	0.894798	1966.76	23.5609	1994.21	13.5608	2022.77	12.2891	2022.77	12.2891	97.2313
RKB_BB_1_1_SILT_1 <>	60.142	69486.4	1.60765	7.73747	0.858234	6.80374	1.50955	0.381808	1.24185	0.822659	2084.72	22.1201	2086.21	13.3644	2087.66	15.0933	2087.66	15.0933	99.8595
RKB_BB_1_1_SILT_84 <>	630.889	401921	4.12877	7.70456	0.180387	6.87698	0.563588	0.384277	0.53394	0.947394	2096.23	9.55503	2095.69	4.99612	2095.15	3.17007	2095.15	3.17007	100.052
RKB_BB_1_1_SILT_76 <>	125.908	311887	0.780735	5.52308	0.305546	12.5287	1.23345	0.501863	1.19501	0.968833	2621.8	25.7422	2644.88	11.599	2662.58	5.0634	2662.58	5.0634	98.4684
RKB_BB_1_1_SILT_52 <>	262.359	438557	0.894777	5.08295	0.224525	13.6228	1.02767	0.502203	1.00284	0.975842	2623.26	21.6124	2723.85	9.72148	2799.3	3.67396	2799.3	3.67396	93.7112
RKB_BB_1_1_SILT_48 <>	92.8691	33842.3	1.3784	5.04614	0.405435	14.2789	1.10238	0.522579	1.02512	0.929913	2710.11	22.6813	2768.41	10.4612	2811.18	6.62701	2811.18	6.62701	96.4046
17l--Whitehorse Sandstone, Rebecca K. Bounds Core, Depth 1622 ft. ( 38.48963, -101.97456)
505-12-RKB-1622-1B	640.518	33588.2	0.577909	20.0565	5.6403	0.179775	5.84194	0.0261508	1.52162	0.260464	166.412	2.49975	167.867	9.03918	188.404	131.348	166.412	2.49975	NA
505-12-RKB-1622-99	62.3159	3101.39	2.94329	19.9689	28.553	0.223397	29.0649	0.0323542	5.43117	0.186863	205.265	10.9727	204.733	53.9408	198.586	675.383	205.265	10.9727	NA
505-12-RKB-1622-9	606.95	45709.4	2.24888	19.7781	3.35273	0.238372	3.90345	0.0341932	1.99905	0.512122	216.739	4.26068	217.087	7.62942	220.862	77.5709	216.739	4.26068	NA
505-12-RKB-1622-19	102.571	4736.88	1.54423	21.7354	16.7925	0.2253	17.5349	0.0355163	5.04807	0.287887	224.981	11.1613	206.311	32.7493	-1.94986	407.329	224.981	11.1613	NA
505-12-RKB-1622-7	208.791	20026.9	1.9689	19.4829	5.51177	0.286263	6.24952	0.0404499	2.94566	0.471342	255.621	7.38239	255.614	14.1234	255.568	126.78	255.621	7.38239	NA
505-12-RKB-1622-49	240.759	21363.4	1.64396	20.2498	6.89696	0.276489	7.33106	0.0406066	2.48523	0.339	256.592	6.25165	247.869	16.1248	166.046	161.351	256.592	6.25165	NA
505-12-RKB-1622-87	121.856	13379.4	2.90703	20.022	10.363	0.280951	11.0343	0.0407978	3.79011	0.343483	257.776	9.57726	251.412	24.5788	192.462	241.523	257.776	9.57726	NA
505-12-RKB-1622-8	243.034	12447.8	1.70123	20.0526	7.77013	0.282645	8.06575	0.0411065	2.16366	0.268253	259.688	5.50711	252.754	18.0491	188.864	181.029	259.688	5.50711	NA
505-12-RKB-1622-94	510.612	43176.3	1.22572	19.7719	4.04653	0.287301	4.26888	0.0411987	1.35976	0.318529	260.259	3.46841	256.433	9.67417	221.574	93.6116	260.259	3.46841	NA
505-12-RKB-1622-78	139.847	74846.7	2.15605	18.7578	9.20736	0.308111	9.52025	0.0419168	2.42069	0.254268	264.703	6.27788	272.716	22.7727	342.066	208.788	264.703	6.27788	NA
505-12-RKB-1622-34	120.629	26953	2.09619	18.8413	10.9785	0.313359	11.1753	0.0428205	2.08806	0.186846	270.292	5.52719	276.781	27.0801	331.978	249.611	270.292	5.52719	NA
505-12-RKB-1622-81	411.328	88191.2	1.8894	19.2223	2.88941	0.312819	3.68649	0.0436112	2.28945	0.621037	275.178	6.16749	276.364	8.91955	286.429	66.0833	275.178	6.16749	NA
505-12-RKB-1622-96	329.302	38314.5	0.812933	19.006	4.64244	0.330894	4.99847	0.0456119	1.85268	0.370649	287.525	5.20986	290.248	12.6193	312.21	105.696	287.525	5.20986	NA
505-12-RKB-1622-65	592.847	104030	15.4615	19.1945	2.46087	0.346338	2.83753	0.0482143	1.4127	0.497862	303.549	4.18884	301.963	7.41182	289.723	56.2323	303.549	4.18884	NA
505-12-RKB-1622-42	304.655	83271.7	0.66983	18.8462	2.65639	0.358296	2.99607	0.048974	1.38565	0.462488	308.22	4.17034	310.942	8.02488	331.398	60.2543	308.22	4.17034	NA
505-12-RKB-1622-53	150.422	1010.37	3.20564	15.7731	12.7323	0.465637	13.1078	0.0532677	3.11483	0.237632	334.552	10.155	388.171	42.3089	721.621	271.19	334.552	10.155	NA
505-12-RKB-1622-11	387.251	35933.9	0.723308	18.1788	2.4146	0.444003	2.77698	0.0585396	1.37162	0.493924	366.738	4.88982	373.071	8.67023	412.577	54.0109	366.738	4.88982	NA
505-12-RKB-1622-57B	210.004	25900.5	1.14776	18.8175	4.25366	0.464258	4.77917	0.0633605	2.17873	0.45588	396.03	8.36874	387.215	15.3871	334.868	96.4413	396.03	8.36874	NA
505-12-RKB-1622-58	190.315	25423.9	3.01296	17.3066	3.57328	0.519335	7.76826	0.0651866	6.89764	0.887927	407.091	27.2116	424.707	26.9681	521.465	78.4212	407.091	27.2116	78.0667
505-12-RKB-1622-4	498.733	60387.7	2.62825	18.1401	1.98388	0.504204	2.34435	0.0663355	1.24909	0.532807	414.04	5.00913	414.544	7.97923	417.331	44.3207	414.04	5.00913	99.2113
505-12-RKB-1622-61	276.593	54944.9	1.83024	18.0101	2.65753	0.51756	3.39372	0.0676045	2.11065	0.621929	421.707	8.6159	423.52	11.7528	433.379	59.2245	421.707	8.6159	97.3067
505-12-RKB-1622-43	306.16	58711.2	5.62144	17.6817	3.52158	0.531126	4.32335	0.0681115	2.50796	0.580097	424.768	10.3096	432.557	15.2289	474.27	77.9272	424.768	10.3096	89.5626
505-12-RKB-1622-92	311.815	49927.3	3.2966	18.114	3.05369	0.527313	3.47889	0.069276	1.66663	0.47907	431.792	6.96066	430.025	12.1964	420.545	68.1835	431.792	6.96066	102.674
505-12-RKB-1622-17	311.479	54213.4	1.83771	18.3165	1.96737	0.525105	2.92969	0.0697569	2.17084	0.74098	434.691	9.12534	428.556	10.2427	395.679	44.1004	434.691	9.12534	109.859
505-12-RKB-1622-52	607.897	148419	8.59255	18.1518	1.13317	0.533806	1.80823	0.0702752	1.40911	0.77928	437.814	5.96446	434.332	6.39001	415.894	25.32	437.814	5.96446	105.27
505-12-RKB-1622-27	127.989	30508.3	2.25341	18.5093	6.74633	0.530297	6.98382	0.0711884	1.80576	0.258563	443.311	7.73609	432.007	24.5783	372.142	152.074	443.311	7.73609	119.124
505-12-RKB-1622-75	269.101	57175.7	1.83468	17.8847	2.8827	0.550313	3.68616	0.0713822	2.29735	0.623236	444.477	9.86712	445.202	13.2868	448.925	64.0748	444.477	9.86712	99.0092
505-12-RKB-1622-33	151.29	22135	1.46824	18.4637	5.56669	0.565216	5.67025	0.0756887	1.07872	0.190243	470.338	4.89298	454.916	20.7938	377.706	125.307	470.338	4.89298	124.525
505-12-RKB-1622-76	197.555	29495.4	1.30507	17.9779	2.95691	0.588599	3.69108	0.0767461	2.20925	0.598536	476.671	10.1509	469.972	13.8872	437.369	65.848	476.671	10.1509	108.986
505-12-RKB-1622-36	1196.76	152212	2.26014	17.7067	0.744983	0.602932	1.12654	0.077429	0.845039	0.750119	480.759	3.9148	479.093	4.30261	471.148	16.4878	480.759	3.9148	102.04
505-12-RKB-1622-100	255.869	44225.7	4.91855	17.4573	3.2444	0.642868	4.30382	0.0813951	2.82784	0.657055	504.444	13.7211	504.08	17.1019	502.447	71.4328	504.444	13.7211	100.398
505-12-RKB-1622-68	406.212	171186	1.84268	16.9855	1.18373	0.74906	1.8084	0.0922772	1.36714	0.755998	568.991	7.44551	567.679	7.86401	562.404	25.8029	568.991	7.44551	101.171
505-12-RKB-1622-32	522.792	114562	1.83256	16.6422	1.25801	0.775601	2.09671	0.0936155	1.67738	0.800005	576.884	9.25619	582.971	9.29979	606.73	27.2159	576.884	9.25619	95.0809
505-12-RKB-1622-88	108.604	15399.4	2.16107	16.8538	6.03039	0.781617	6.26946	0.0955411	1.7148	0.273516	588.225	9.64038	586.405	27.935	579.349	131.125	588.225	9.64038	101.532
505-12-RKB-1622-24	65.6699	14944.8	0.706302	15.9967	2.77393	0.908616	5.04233	0.105417	4.21075	0.83508	646.074	25.8859	656.322	24.3785	691.702	59.1407	646.074	25.8859	93.4036
505-12-RKB-1622-89	84.2077	39175.1	5.14497	13.9034	2.0944	1.7096	2.59296	0.172391	1.52869	0.589557	1025.27	14.4904	1012.13	16.6132	983.802	42.624	983.802	42.624	104.215
505-12-RKB-1622-21	233.681	216348	6.0446	13.8883	0.812887	1.72109	2.61637	0.173362	2.48688	0.95051	1030.61	23.6863	1016.43	16.8046	986.009	16.5302	986.009	16.5302	104.523
505-12-RKB-1622-23	148.462	123441	2.93202	13.8173	2.37857	1.64064	2.71411	0.164413	1.30721	0.481636	981.252	11.8985	985.96	17.1239	996.475	48.3365	996.475	48.3365	98.4724
505-12-RKB-1622-59	157.775	65579.5	2.87655	13.8024	2.07632	1.74709	2.56616	0.174891	1.508	0.587651	1039	14.4708	1026.09	16.5727	998.63	42.1792	998.63	42.1792	104.043
505-12-RKB-1622-70	103.633	37108.1	1.68893	13.7893	3.70945	1.71355	4.4733	0.171372	2.50007	0.558887	1019.66	23.5785	1013.61	28.6901	1000.55	75.3706	1000.55	75.3706	101.911
505-12-RKB-1622-86	78.0689	48105.5	2.1641	13.7864	3.15176	1.73569	3.55154	0.173548	1.63703	0.460936	1031.63	15.6061	1021.86	22.8837	1000.99	64.0311	1000.99	64.0311	103.061
505-12-RKB-1622-5	133.18	43867.7	2.86058	13.7786	1.71907	1.74354	2.03719	0.174235	1.09314	0.53659	1035.4	10.4562	1024.77	13.1464	1002.13	34.902	1002.13	34.902	103.321
505-12-RKB-1622-95	160.903	53675.9	1.82255	13.7391	1.54758	1.61591	6.14832	0.161019	5.95036	0.967803	962.435	53.1996	976.405	38.5824	1007.95	31.3765	1007.95	31.3765	95.4848
505-12-RKB-1622-64B	121.124	94670.2	2.12124	13.5417	1.73321	1.80881	2.89185	0.17765	2.31491	0.800492	1054.12	22.5114	1048.65	18.9115	1037.24	35.021	1037.24	35.021	101.628
505-12-RKB-1622-22	526.206	58528.5	4.74295	13.4887	1.10007	1.60905	2.63185	0.157412	2.39092	0.908455	942.38	20.9621	973.739	16.4823	1045.19	22.2077	1045.19	22.2077	90.1632
505-12-RKB-1622-53B	112.686	32718.9	6.36745	13.4764	2.3982	1.85138	3.6086	0.180953	2.69641	0.747218	1072.18	26.6342	1063.92	23.7951	1047.04	48.3799	1047.04	48.3799	102.401
505-12-RKB-1622-18	47.6582	29575.2	2.00596	13.4188	4.29897	1.90832	5.49053	0.185722	3.41537	0.622047	1098.16	34.4858	1084	36.5966	1055.67	86.6191	1055.67	86.6191	104.025
505-12-RKB-1622-46	457.688	103280	3.09002	13.4162	0.566257	1.83275	2.0393	0.178332	1.95911	0.960676	1057.86	19.1135	1057.26	13.3977	1056.06	11.4216	1056.06	11.4216	100.17
505-12-RKB-1622-40	344.247	191560	4.17278	13.3347	0.948307	1.87907	1.33469	0.18173	0.939207	0.70369	1076.42	9.31083	1073.73	8.84529	1068.31	19.0416	1068.31	19.0416	100.759
505-12-RKB-1622-44	25.7505	11919.2	1.32765	13.3275	8.24451	1.9147	8.79111	0.185075	3.0515	0.347112	1094.64	30.7211	1086.22	58.7035	1069.4	165.975	1069.4	165.975	102.36
505-12-RKB-1622-10	517.703	119495	3.65764	13.299	0.356721	1.91507	1.33389	0.184716	1.28531	0.963578	1092.69	12.9186	1086.35	8.89812	1073.69	7.15408	1073.69	7.15408	101.769
505-12-RKB-1622-55	101.602	27660	2.63442	13.1446	1.96923	1.88252	2.52053	0.179468	1.57327	0.624183	1064.07	15.4321	1074.95	16.7158	1097.08	39.4148	1097.08	39.4148	96.9913
505-12-RKB-1622-74	41.3926	11815	2.55348	13.1107	6.56718	1.79744	7.55387	0.170915	3.73271	0.494145	1017.15	35.1239	1044.53	49.3213	1102.27	131.481	1102.27	131.481	92.2776
505-12-RKB-1622-84	121.162	123537	3.4404	12.9167	1.56927	2.08803	3.53292	0.195608	3.16527	0.895935	1151.68	33.3834	1144.88	24.2606	1132	31.2458	1132	31.2458	101.739
505-12-RKB-1622-69	29.0331	13144.5	3.07475	12.8824	8.14674	2.06552	8.34794	0.192985	1.8217	0.218222	1137.52	18.997	1137.45	57.1732	1137.32	162.338	1137.32	162.338	100.018
505-12-RKB-1622-72	58.3808	91923.5	2.17379	12.7803	3.68818	2.079	4.23304	0.192706	2.07749	0.49078	1136.02	21.6382	1141.9	29.0299	1153.09	73.219	1153.09	73.219	98.5198
505-12-RKB-1622-73	128.188	72228	3.7969	12.7562	2.41912	2.16025	3.02105	0.199859	1.8096	0.598995	1174.56	19.431	1168.35	20.9717	1156.85	47.9966	1156.85	47.9966	101.531
505-12-RKB-1622-37	38.1043	17196.7	2.20252	12.6952	8.16615	2.20171	8.52291	0.20272	2.44007	0.286295	1189.92	26.5127	1181.58	59.5791	1166.34	162.035	1166.34	162.035	102.021
505-12-RKB-1622-41	258.02	85056.8	2.78263	12.5933	1.18491	2.24529	1.40178	0.205074	0.748975	0.534303	1202.52	8.21643	1195.31	9.84786	1182.32	23.4193	1182.32	23.4193	101.709
505-12-RKB-1622-28	382.229	43284.3	3.14017	12.5738	0.942904	2.22147	2.19465	0.202585	1.98177	0.903001	1189.19	21.5211	1187.83	15.3679	1185.38	18.6278	1185.38	18.6278	100.321
505-12-RKB-1622-85	87.8715	57893.9	4.19415	12.5098	1.65221	2.2253	2.02697	0.2019	1.17422	0.579299	1185.52	12.7156	1189.04	14.2011	1195.44	32.5946	1195.44	32.5946	99.1703
505-12-RKB-1622-47	136.277	134169	4.63454	12.3867	1.28369	2.42701	2.92606	0.218034	2.62944	0.898629	1271.48	30.3424	1250.63	21.0442	1214.91	25.2346	1214.91	25.2346	104.656
505-12-RKB-1622-26	597.386	133773	2.4672	12.3668	0.484034	2.39477	1.86446	0.214793	1.80054	0.965713	1254.3	20.5229	1241.04	13.3556	1218.09	9.49895	1218.09	9.49895	102.972
505-12-RKB-1622-77	118.394	62078.4	1.91619	12.3386	1.79467	2.33399	1.99472	0.208864	0.870684	0.436493	1222.76	9.69764	1222.69	14.18	1222.55	35.2662	1222.55	35.2662	100.017
505-12-RKB-1622-25	247.542	129302	3.10999	12.2598	1.32654	2.20375	2.1333	0.19595	1.6707	0.783155	1153.52	17.6461	1182.23	14.901	1235.17	26.024	1235.17	26.024	93.3898
505-12-RKB-1622-39	161.287	153783	1.32641	12.0063	1.38069	2.60144	2.09703	0.226528	1.57836	0.752667	1316.27	18.7918	1301.04	15.3817	1275.99	26.9243	1275.99	26.9243	103.157
505-12-RKB-1622-82	106.244	57079	1.18525	10.7008	1.04174	3.33858	2.40674	0.259106	2.1696	0.901469	1485.27	28.7817	1490.12	18.8072	1497.02	19.7054	1497.02	19.7054	99.215
505-12-RKB-1622-80	148.358	147129	3.21913	10.0288	1.21364	4.04106	1.85574	0.293928	1.40387	0.756502	1661.13	20.5578	1642.5	15.1061	1618.72	22.5915	1618.72	22.5915	102.62
505-12-RKB-1622-98	142.934	114664	1.69891	9.89195	0.847598	4.13564	1.36625	0.296704	1.07155	0.784299	1674.95	15.8057	1661.38	11.1719	1644.25	15.7269	1644.25	15.7269	101.867
505-12-RKB-1622-13	214.43	347304	1.41069	9.84049	0.533824	4.11698	0.960266	0.293829	0.798211	0.83124	1660.64	11.6857	1657.68	7.84504	1653.92	9.89083	1653.92	9.89083	100.406
505-12-RKB-1622-71	333.558	315955	5.2859	9.77373	0.350494	4.17546	0.834424	0.295981	0.757243	0.907504	1671.35	11.1486	1669.22	6.83563	1666.52	6.48303	1666.52	6.48303	100.29
505-12-RKB-1622-12	387.913	188809	3.37061	9.74716	0.32208	4.29815	1.47908	0.30385	1.44359	0.976003	1710.37	21.6867	1693.01	12.1843	1671.56	5.9552	1671.56	5.9552	102.322
505-12-RKB-1622-66	91.1621	46046.1	1.6111	9.3721	1.41307	4.52484	1.92186	0.307567	1.3026	0.677783	1728.72	19.7518	1735.55	15.9835	1743.77	25.89	1743.77	25.89	99.1371
505-12-RKB-1622-97	98.6812	64434.9	4.15133	9.36241	1.24955	4.69762	2.19729	0.31898	1.8074	0.822558	1784.75	28.1773	1766.82	18.3971	1745.66	22.8882	1745.66	22.8882	102.239
505-12-RKB-1622-48	268.677	310744	3.03125	9.21364	0.42409	4.74994	2.65951	0.317408	2.62548	0.987204	1777.06	40.7784	1776.1	22.3113	1774.95	7.73839	1774.95	7.73839	100.119
505-12-RKB-1622-20	233.882	146128	2.4532	9.17035	0.260458	4.97508	1.07873	0.330891	1.04681	0.970413	1842.7	16.7776	1815.1	9.12031	1783.54	4.74688	1783.54	4.74688	103.317
505-12-RKB-1622-14	274.502	388870	1.95255	9.12008	0.408586	4.91787	1.15819	0.325293	1.08372	0.935706	1815.53	17.1475	1805.33	9.77313	1793.55	7.44018	1793.55	7.44018	101.225
505-12-RKB-1622-50	292.059	13256.2	6.45097	8.94406	1.20491	5.03585	7.10073	0.326667	6.99775	0.985498	1822.21	111.087	1825.37	60.2249	1828.96	21.8448	1828.96	21.8448	99.6307
505-12-RKB-1622-63	149.996	97829	1.22508	8.81686	0.986877	5.18719	1.30012	0.331699	0.846391	0.651011	1846.61	13.5903	1850.52	11.068	1854.89	17.8351	1854.89	17.8351	99.5539
505-12-RKB-1622-93	66.9325	48194.7	1.95653	7.83909	0.925023	6.70202	1.38408	0.381039	1.02956	0.743863	2081.14	18.312	2072.89	12.2296	2064.68	16.3105	2064.68	16.3105	100.797
505-12-RKB-1622-16	222.578	112347	2.29681	7.81245	0.42416	6.88456	1.58373	0.390087	1.52588	0.963468	2123.23	27.6032	2096.67	14.0423	2070.68	7.47257	2070.68	7.47257	102.538
505-12-RKB-1622-79	289.34	399056	1.87327	7.76409	0.399918	6.7297	1.40671	0.378953	1.34867	0.958737	2071.39	23.8925	2076.53	12.4363	2081.62	7.03892	2081.62	7.03892	99.5087
505-12-RKB-1622-35	559.262	96946.7	17.3713	7.677	0.283754	6.6268	2.19579	0.368972	2.17738	0.991615	2024.56	37.8318	2062.92	19.3747	2101.45	4.98307	2101.45	4.98307	96.3414
505-12-RKB-1622-45	120.414	122045	1.51138	7.43796	0.691359	7.49596	1.40993	0.404371	1.22879	0.871526	2189.13	22.8085	2172.5	12.6318	2156.82	12.0643	2156.82	12.0643	101.498
505-12-RKB-1622-54	379.178	47014.6	4.67061	6.67566	0.220652	8.36189	1.03049	0.404853	1.00659	0.976807	2191.34	18.6999	2271.05	9.34606	2343.6	3.77191	2343.6	3.77191	93.5032
505-12-RKB-1622-67	295.164	391212	1.63126	5.86059	0.173311	11.6535	6.43789	0.495332	6.43555	0.999638	2593.7	137.445	2576.98	60.2738	2563.83	2.89947	2563.83	2.89947	101.165
505-12-RKB-1622-83	35.2763	55292.8	1.61187	5.44719	1.44138	13.2367	3.41517	0.522939	3.0961	0.906572	2711.63	68.5359	2696.68	32.2522	2685.48	23.8325	2685.48	23.8325	100.974
505-12-RKB-1622-29	117.537	81226.6	1.58669	5.41098	0.390337	12.9273	2.5089	0.507321	2.47835	0.987823	2645.18	53.7735	2674.37	23.6501	2696.49	6.44805	2696.49	6.44805	98.0972
505-12-RKB-1622-6	86.1747	216579	1.69582	5.30046	0.469443	13.9833	1.87522	0.537553	1.81551	0.968158	2773.2	40.9181	2748.58	17.7717	2730.53	7.72657	2730.53	7.72657	101.563

## Sheet: OKlahoma
Analysis	U	206Pb	U/Th	206Pb*	±	207Pb*	±	206Pb*	±	error	206Pb*	±	207Pb*	±	206Pb*	±	Best age	±	Conc
	(ppm)	204Pb		207Pb*	(%)	235U*	(%)	238U	(%)	corr.	238U*	(Ma)	235U	(Ma)	207Pb*	(Ma)	(Ma)	(Ma)	(%)
23--Duncan Sandstone, Oklahoma. ( 35°10'1.51"N 97°33'52.89"W)
DUNCANGRADY-58	405.21	815835	6.79952	5.01011	0.107982	14.7892	1.36398	0.537391	1.3597	0.996861	2772.52	30.6387	2801.77	12.9732	2822.89	1.76311	2822.89	1.76311	98.2156
DUNCANGRADY-12	182.413	429984	1.15585	5.2264	0.199389	14.0978	0.844324	0.534384	0.820444	0.971716	2759.9	18.4199	2756.31	8.00545	2753.67	3.27626	2753.67	3.27626	100.226
DUNCANGRADY-40	219.107	559341	1.41018	6.2476	0.223097	10.1376	0.770493	0.459355	0.737487	0.957163	2436.71	14.9645	2447.41	7.12114	2456.3	3.77234	2456.3	3.77234	99.2027
DUNCANGRADY-56	215.628	197717	0.67963	6.85975	0.205526	8.61793	0.720016	0.428756	0.690059	0.958395	2300.11	13.3493	2298.45	6.55088	2296.97	3.53301	2296.97	3.53301	100.137
DUNCANGRADY-8	472.951	544841	29.8416	9.98765	0.144599	3.97764	0.839737	0.288129	0.827193	0.985063	1632.17	11.9276	1629.64	6.81368	1626.36	2.68914	1626.36	2.68914	100.357
DUNCANGRADY-55	222.538	157966	1.97147	5.70122	0.287469	12.2888	0.592927	0.50813	0.51858	0.874609	2648.64	11.2634	2626.71	5.56749	2609.85	4.78791	2609.85	4.78791	101.487
DUNCANGRADY-70	79.487	319050	2.60869	5.08225	0.364143	15.1702	1.1515	0.559174	1.09241	0.948682	2863.21	25.2556	2825.98	10.9695	2799.52	5.95845	2799.52	5.95845	102.275
DUNCANGRADY-114	556.271	453270	2.04148	10.0303	0.188903	4.03454	0.830824	0.293498	0.809064	0.973809	1658.99	11.8343	1641.19	6.76051	1618.45	3.51497	1618.45	3.51497	102.505
DUNCANGRADY-80	232.633	288857	4.32432	8.91002	0.226396	5.13828	0.601774	0.332044	0.557564	0.926533	1848.28	8.95962	1842.46	5.11491	1835.87	4.10127	1835.87	4.10127	100.676
DUNCANGRADY-118	127.54	54464.3	2.69021	7.77916	0.308213	6.55272	1.29473	0.369703	1.25751	0.971252	2028	21.8805	2053.01	11.4063	2078.2	5.42473	2078.2	5.42473	97.5845
DUNCANGRADY-62	159.711	107538	1.03534	8.23175	0.308724	6.04889	0.73676	0.361132	0.668958	0.907973	1987.54	11.4415	1982.91	6.41973	1978.07	5.49879	1978.07	5.49879	100.479
DUNCANGRADY-27	362.964	385155	5.15972	9.94356	0.271735	3.96421	1.37451	0.285889	1.34738	0.980263	1620.95	19.3109	1626.9	11.1455	1634.59	5.04814	1634.59	5.04814	99.1659
DUNCANGRADY-23	145.556	176333	3.47616	9.32127	0.327763	4.71615	1.39522	0.318832	1.35618	0.972015	1784.02	21.1353	1770.11	11.689	1753.73	5.99791	1753.73	5.99791	101.727
DUNCANGRADY-71	117.23	188508	1.38831	6.17982	0.53987	8.73965	4.62423	0.391713	4.59261	0.993162	2130.77	83.3337	2311.22	42.157	2474.72	9.1092	2474.72	9.1092	86.1015
DUNCANGRADY-115	158.705	93687.5	2.02821	9.91007	0.325392	4.09617	0.790603	0.294411	0.720537	0.911376	1663.53	10.5647	1653.54	6.45251	1640.85	6.04007	1640.85	6.04007	101.382
DUNCANGRADY-60	29.5285	76227.6	0.538424	5.47811	0.618848	13.1319	1.37235	0.521745	1.2249	0.892554	2706.58	27.073	2689.18	12.9493	2676.12	10.2421	2676.12	10.2421	101.138
DUNCANGRADY-104	48.8876	101642	0.413408	5.20368	0.705534	12.7133	2.23651	0.479808	2.12231	0.948938	2526.43	44.3604	2658.64	21.0562	2760.83	11.5854	2760.83	11.5854	91.5099
DUNCANGRADY-32	27.3801	54233	0.232679	5.6136	0.808463	12.6106	1.26706	0.513422	0.975621	0.769986	2671.22	21.3361	2651.01	11.9208	2635.61	13.4288	2635.61	13.4288	101.351
DUNCANGRADY-116	190.309	306047	1.56055	10.4116	0.432629	3.65588	0.566105	0.276062	0.365112	0.644954	1571.5	5.09189	1561.79	4.51357	1548.67	8.12751	1548.67	8.12751	101.474
DUNCANGRADY-68	87.488	97229.2	1.43014	8.18408	0.599401	6.19993	0.967563	0.368007	0.759537	0.785	2020.01	13.1715	2004.44	8.46014	1988.41	10.6633	1988.41	10.6633	101.589
DUNCANGRADY-83	118.351	112140	1.06455	9.79768	0.521897	4.15923	0.913373	0.295552	0.749582	0.820675	1669.22	11.0234	1666.03	7.47676	1662	9.65985	1662	9.65985	100.434
DUNCANGRADY-42	27.0167	32001	0.831584	6.23133	0.887946	10.0335	3.66979	0.453453	3.56074	0.970286	2410.59	71.6157	2437.87	33.8978	2460.71	15.0052	2460.71	15.0052	97.9632
DUNCANGRADY-10	98.6878	41350.2	6.20955	16.0367	2.97065	0.925945	3.04683	0.107696	0.677053	0.222216	659.351	4.24344	665.499	14.8748	686.398	63.4145	659.351	4.24344	96.0595
DUNCANGRADY-28	161.002	48133	1.3429	17.2041	2.6459	0.690326	2.74665	0.0861359	0.737089	0.268359	532.644	3.76824	532.996	11.3903	534.526	57.9297	532.644	3.76824	99.648
DUNCANGRADY-57	12.3974	39729.3	0.774885	5.372	1.17178	13.7189	1.63735	0.534507	1.14361	0.698453	2760.41	25.6793	2730.5	15.497	2708.43	19.3355	2708.43	19.3355	101.919
DUNCANGRADY-26	155.023	142025	1.88123	10.7511	0.56701	3.28215	1.04124	0.255924	0.873319	0.838727	1468.96	11.472	1476.83	8.10378	1488.14	10.738	1488.14	10.738	98.7107
DUNCANGRADY-39	146.009	111221	1.23497	10.8453	0.597826	3.17879	0.742901	0.250035	0.441028	0.593657	1438.65	5.68674	1452.02	5.73821	1471.62	11.3466	1471.62	11.3466	97.7601
DUNCANGRADY-73	123.933	78723.8	2.89469	11.4326	0.583446	2.87288	1.23256	0.23821	1.08573	0.880869	1377.38	13.465	1374.83	9.28399	1370.84	11.2274	1370.84	11.2274	100.477
DUNCANGRADY-63	137.874	147052	2.49397	10.8425	0.714578	3.25295	0.999358	0.255804	0.698638	0.699087	1468.34	9.17393	1469.88	7.76151	1472.09	13.5618	1472.09	13.5618	99.7448
DUNCANGRADY-88	156.44	102327	1.13309	17.0643	1.84056	0.759553	2.08092	0.0940037	0.970847	0.466548	579.172	5.37768	573.752	9.1212	552.357	40.1744	579.172	5.37768	104.855
DUNCANGRADY-15	261.167	104261	0.974115	17.7644	1.58195	0.580801	1.86778	0.0748301	0.992998	0.531644	465.19	4.45659	464.976	6.96809	463.922	35.0556	465.19	4.45659	100.273
DUNCANGRADY-87	338.687	249233	2.12897	13.3782	0.505756	1.84899	0.793178	0.179404	0.611018	0.770342	1063.72	5.99158	1063.07	5.22695	1061.76	10.1758	1061.76	10.1758	100.184
DUNCANGRADY-82	98.9235	89108.4	2.04527	11.7157	0.655982	2.70049	3.0786	0.229461	3.0079	0.977035	1331.67	36.1893	1328.59	22.816	1323.62	12.7053	1323.62	12.7053	100.609
DUNCANGRADY-33	293.493	232700	1.52891	13.9759	0.465322	1.60305	0.818632	0.16249	0.673523	0.822742	970.597	6.06887	971.399	5.11902	973.232	9.48792	973.232	9.48792	99.7293
DUNCANGRADY-66	94.8775	43632.3	491.676	16.2888	2.95167	0.870008	3.14272	0.10278	1.07906	0.343353	630.683	6.48317	635.571	14.8473	652.987	63.3385	630.683	6.48317	96.5844
DUNCANGRADY-45	325.63	222364	4.2208	13.1946	0.561663	1.81399	2.24558	0.173592	2.1742	0.968215	1031.87	20.7316	1050.52	14.6994	1089.49	11.2341	1089.49	11.2341	94.7118
DUNCANGRADY-16	168.591	70825.8	6.52636	17.4715	2.08312	0.678655	2.3517	0.0859957	1.09138	0.46408	531.812	5.57111	525.961	9.6541	500.665	45.8622	531.812	5.57111	106.221
DUNCANGRADY-106	134.373	114010	1.45642	13.2577	0.581691	1.89996	1.27734	0.182688	1.13721	0.890291	1081.64	11.3239	1081.07	8.49766	1079.91	11.6532	1079.91	11.6532	100.16
DUNCANGRADY-46	154.193	76820.5	2.03745	17.1747	3.10481	0.69593	3.31157	0.0866867	1.1518	0.34781	535.912	5.923	536.357	13.799	538.239	67.9196	535.912	5.923	99.5677
DUNCANGRADY-120	52.2807	73661.3	4.19916	8.72488	1.18588	5.42293	1.68319	0.343157	1.1945	0.709662	1901.84	19.673	1888.49	14.4309	1873.82	21.3814	1873.82	21.3814	101.495
DUNCANGRADY-3	65.1739	13899.3	1.17696	18.0651	4.25093	0.541118	4.41943	0.0708974	1.20869	0.273494	441.56	5.15839	439.161	15.7575	426.588	94.8238	441.56	5.15839	103.51
DUNCANGRADY-35	313.339	177305	2.72572	13.6097	0.599673	1.72117	1.13501	0.169891	0.963662	0.849032	1011.51	9.02127	1016.46	7.28963	1027.12	12.1285	1027.12	12.1285	98.48
DUNCANGRADY-119	96.2735	34670.5	1.53096	17.0937	3.58476	0.717912	3.81798	0.0890031	1.31397	0.344153	549.639	6.92277	549.434	16.2021	548.605	78.2907	549.639	6.92277	100.188
DUNCANGRADY-2	75.5383	95414.7	1.04619	11.6794	0.865321	2.75003	1.86131	0.232946	1.64794	0.885364	1349.92	20.0711	1342.1	13.8605	1329.63	16.7471	1329.63	16.7471	101.526
DUNCANGRADY-14	117.31	84139.5	0.829734	11.7065	0.882645	2.64935	3.03887	0.22494	2.90787	0.95689	1307.92	34.423	1314.46	22.4046	1325.12	17.0924	1325.12	17.0924	98.702
DUNCANGRADY-5	54.4504	73546.8	0.858808	9.99436	1.13646	3.84208	1.56299	0.278497	1.07302	0.686521	1583.79	15.0678	1601.61	12.5934	1625.11	21.1373	1625.11	21.1373	97.457
DUNCANGRADY-29	39.9796	86878.1	1.12417	8.98244	1.3188	4.92435	1.54931	0.320806	0.813097	0.524813	1793.66	12.731	1806.44	13.0767	1821.2	23.9326	1821.2	23.9326	98.4882
DUNCANGRADY-4	25.8966	47091.1	0.793209	8.66597	1.38357	5.4661	2.20581	0.343553	1.71795	0.778827	1903.74	28.3184	1895.29	18.9358	1886.03	24.9121	1886.03	24.9121	100.939
DUNCANGRADY-51	67.5286	18458	1.54424	18.1702	7.64186	0.652664	7.78166	0.0860098	1.46837	0.188696	531.895	7.49666	510.117	31.2136	413.632	171.043	531.895	7.49666	128.592
DUNCANGRADY-22	69.1346	15420.7	0.89193	17.5393	7.76017	0.578459	7.91984	0.0735841	1.58225	0.199783	457.713	6.99103	463.47	29.4786	492.123	171.345	457.713	6.99103	93.0078
DUNCANGRADY-103	119.97	117318	1.07676	11.9945	1.02732	2.35378	1.38428	0.20476	0.927812	0.67025	1200.84	10.1654	1228.7	9.86502	1277.91	20.0093	1277.91	20.0093	93.969
DUNCANGRADY-91	38.2379	35236.7	1.41933	15.3073	2.66868	1.10321	3.15257	0.122477	1.67834	0.532371	744.807	11.8053	754.901	16.7923	784.905	56.0615	744.807	11.8053	94.8913
DUNCANGRADY-44	225.069	187890	0.859195	14.4799	0.69383	1.43927	0.879072	0.15115	0.539784	0.614039	907.407	4.56894	905.417	5.26673	900.547	14.3193	900.547	14.3193	100.762
DUNCANGRADY-97	85.777	51189.2	1.86772	15.3113	4.10419	1.1923	4.46281	0.132403	1.75279	0.392755	801.557	13.2113	797.026	24.6495	784.357	86.2261	801.557	13.2113	102.193
DUNCANGRADY-21	24.5969	31145.2	0.544784	8.26053	1.84374	6.0187	2.45418	0.360587	1.61975	0.659998	1984.95	27.6728	1978.55	21.3721	1971.85	32.862	1971.85	32.862	100.664
DUNCANGRADY-74	418.066	174097	38.4555	16.6797	0.944921	0.77626	2.0954	0.093906	1.87024	0.892549	578.597	10.3498	583.348	9.29842	601.866	20.4459	578.597	10.3498	96.1338
DUNCANGRADY-81	178.19	181697	2.73896	13.6914	0.909867	1.73529	1.30624	0.172313	0.937237	0.717506	1024.84	8.88062	1021.72	8.41459	1015.01	18.4187	1015.01	18.4187	100.969
DUNCANGRADY-78	224.054	121481	4.27395	13.5883	0.927095	1.78882	1.02558	0.17629	0.438539	0.427599	1046.68	4.23682	1041.39	6.67964	1030.31	18.7614	1030.31	18.7614	101.589
DUNCANGRADY-122	71.8401	66712.2	2.09336	12.5469	1.11501	2.23573	1.33758	0.203448	0.738821	0.552358	1193.81	8.05161	1192.32	9.38442	1189.62	22.0334	1189.62	22.0334	100.352
DUNCANGRADY-20	124.854	170165	2.50858	13.0752	1.04967	1.98763	1.46845	0.188488	1.0269	0.69931	1113.18	10.4987	1111.32	9.91998	1107.66	20.9885	1107.66	20.9885	100.498
DUNCANGRADY-41	35.319	28794.4	0.663241	16.3883	7.28169	0.864929	7.55152	0.102804	2.00062	0.264929	630.823	12.0225	632.81	35.5763	639.936	156.787	630.823	12.0225	98.576
DUNCANGRADY-30	117.351	82310.5	1.4819	14.3364	2.48714	1.38297	3.30233	0.143798	2.17245	0.657853	866.105	17.6065	881.707	19.4625	921.09	51.1345	866.105	17.6065	94.0305
DUNCANGRADY-96	34.2416	14579.6	0.560827	14.8722	6.69687	1.23791	7.09737	0.133525	2.35045	0.331171	807.942	17.8485	817.932	39.8838	845.198	139.461	807.942	17.8485	95.592
DUNCANGRADY-11	60.8061	47532.3	1.27902	10.7963	1.72985	3.29725	1.88406	0.258181	0.746531	0.396235	1480.53	9.87526	1480.4	14.6797	1480.21	32.7966	1480.21	32.7966	100.022
DUNCANGRADY-84	134.739	46515.7	1.58202	12.714	1.31352	2.16295	1.76646	0.199447	1.18112	0.668637	1172.35	12.6607	1169.22	12.2662	1163.41	26.0329	1163.41	26.0329	100.768
DUNCANGRADY-109	57.4393	66255.5	0.952505	11.8339	1.51325	2.69451	3.8218	0.231263	3.50945	0.918271	1341.12	42.4932	1326.95	28.3096	1304.14	29.3922	1304.14	29.3922	102.836
DUNCANGRADY-76	366.635	150766	6.80332	15.1937	2.14892	0.997978	3.41689	0.109972	2.65656	0.777478	672.587	16.9672	702.783	17.3314	800.535	45.0467	672.587	16.9672	84.0172
DUNCANGRADY-77	651.6	8884.33	1.94717	16.0443	1.19041	0.91553	2.91186	0.106535	2.65741	0.912617	652.593	16.4932	659.993	14.1323	685.385	25.4206	652.593	16.4932	95.2155
DUNCANGRADY-113	38.9158	7191.73	0.871461	18.9635	12.4359	0.534522	12.7274	0.0735164	2.70832	0.212794	457.306	11.9562	434.806	45.0451	317.293	283.696	457.306	11.9562	144.127
DUNCANGRADY-48	120.677	112534	1.67898	13.7635	1.30891	1.72928	1.67869	0.17262	1.05106	0.626122	1026.53	9.97429	1019.48	10.8002	1004.35	26.5462	1004.35	26.5462	102.208
DUNCANGRADY-17	361.467	9834.04	2.78766	18.5076	3.31935	0.406339	4.3289	0.0545428	2.77873	0.641902	342.351	9.26484	346.236	12.7007	372.36	74.7538	342.351	9.26484	NA
DUNCANGRADY-13	82.0007	106394	1.05045	12.621	1.63355	2.15586	1.92111	0.197339	1.01103	0.526272	1161.01	10.7418	1166.94	13.3263	1177.98	32.2916	1177.98	32.2916	98.5589
DUNCANGRADY-110	82.3118	131288	0.825497	13.2933	1.47682	1.93631	1.68028	0.186684	0.801456	0.476979	1103.39	8.12774	1093.72	11.2513	1074.56	29.6427	1074.56	29.6427	102.682
DUNCANGRADY-93	78.9497	41313.7	2.75589	13.6759	1.39141	1.75951	1.79777	0.17452	1.1384	0.633231	1036.97	10.9044	1030.67	11.6397	1017.3	28.2036	1017.3	28.2036	101.933
DUNCANGRADY-98	35.1932	24945.2	0.922674	10.5906	2.26768	3.48131	2.88289	0.267401	1.78009	0.617465	1527.59	24.2109	1522.99	22.7441	1516.58	42.7862	1516.58	42.7862	100.726
DUNCANGRADY-53	52.8293	33164.6	3.44168	16.6429	10.9533	0.840422	11.3621	0.101444	3.02024	0.265818	622.864	17.9318	619.378	52.7301	606.639	237.538	622.864	17.9318	102.675
DUNCANGRADY-121	72.5243	53586.4	2.36896	13.1613	1.59372	2.02171	3.54918	0.192982	3.17124	0.893512	1137.51	33.07	1122.83	24.1161	1094.57	31.8915	1094.57	31.8915	103.923
DUNCANGRADY-90	63.7761	25361.9	1.60694	11.632	2.06247	2.77442	2.62167	0.234059	1.61844	0.617333	1355.74	19.7882	1348.68	19.5697	1337.48	39.8757	1337.48	39.8757	101.365
DUNCANGRADY-99	93.7538	87163.2	0.478191	13.5261	1.53951	1.83064	2.17918	0.179587	1.54232	0.70775	1064.72	15.1369	1056.51	14.311	1039.57	31.0982	1039.57	31.0982	102.42
DUNCANGRADY-19	26.0688	16708.2	1.56398	17.637	9.54635	0.814117	10.0532	0.104138	3.15194	0.313525	638.614	19.1639	604.761	45.8408	479.828	211.391	638.614	19.1639	133.092
DUNCANGRADY-43	183.781	77552.2	4.56201	15.1197	1.13421	1.12364	3.64321	0.123216	3.46215	0.950305	749.046	24.4833	764.715	19.5755	810.758	23.7263	749.046	24.4833	92.3883
DUNCANGRADY-38	77.7053	40797.4	0.953516	13.1471	1.85274	2.00973	2.25038	0.191632	1.27733	0.567605	1130.21	13.2418	1118.8	15.2591	1096.7	37.0667	1096.7	37.0667	103.056
DUNCANGRADY-86	55.2459	36650	2.27906	12.7597	2.00673	2.16518	3.09929	0.20037	2.36191	0.762082	1177.31	25.4157	1169.94	21.5304	1156.3	39.7977	1156.3	39.7977	101.817
DUNCANGRADY-112	11.4381	14902	0.306513	9.02117	3.49147	5.13602	4.05713	0.336038	2.06638	0.509321	1867.58	33.5044	1842.08	34.495	1813.39	63.4378	1813.39	63.4378	102.988
DUNCANGRADY-50	73.1057	102230	1.32366	13.4154	1.89859	1.84336	2.18327	0.179355	1.07798	0.493742	1063.45	10.5681	1061.06	14.373	1056.17	38.2528	1056.17	38.2528	100.689
DUNCANGRADY-54	99.039	54703.4	0.944036	13.8553	1.77151	1.63595	1.96455	0.164393	0.849241	0.432282	981.145	7.72918	984.153	12.3808	990.888	36.0301	990.888	36.0301	99.0167
DUNCANGRADY-94	92.1362	51061.5	1.00705	13.4423	1.96423	1.74844	2.20255	0.17046	0.996509	0.452435	1014.65	9.35549	1026.59	14.2282	1052.14	39.5807	1052.14	39.5807	96.4361
DUNCANGRADY-105	45.2162	27772.7	1.56437	13.383	2.34486	1.86993	2.59939	0.181501	1.1218	0.431565	1075.17	11.1091	1070.51	17.1987	1061.04	47.1893	1061.04	47.1893	101.332
DUNCANGRADY-89	13.4703	25124	1.0923	15.9266	23.7597	0.975707	24.2684	0.112704	4.94258	0.203663	688.435	32.2728	691.401	122.281	701.041	512.615	688.435	32.2728	98.2018
DUNCANGRADY-95	36.8012	24176.6	1.59718	12.7543	3.01503	2.11503	3.27771	0.195646	1.28569	0.392252	1151.89	13.562	1153.72	22.6009	1157.14	59.8361	1157.14	59.8361	99.5459
DUNCANGRADY-7	13.5958	22222.4	1.51911	10.1419	5.32999	4.01226	5.69647	0.295125	2.01022	0.35289	1667.09	29.5297	1636.68	46.3332	1597.82	99.5537	1597.82	99.5537	104.335
DUNCANGRADY-117	51.6342	37910.1	1.14908	13.5987	3.17462	1.77452	3.36263	0.175016	1.10863	0.329692	1039.69	10.6448	1036.17	21.8408	1028.75	64.206	1028.75	64.206	101.063
DUNCANGRADY-47	64.8496	31807.2	1.3005	13.2683	3.41043	1.80213	5.37229	0.173421	4.15096	0.772661	1030.93	39.5475	1046.23	35.0962	1078.33	68.4732	1078.33	68.4732	95.6047
DUNCANGRADY-9	44.511	53220.7	1.47916	13.6569	3.23857	1.79951	3.76375	0.17824	1.91768	0.509512	1057.35	18.701	1045.28	24.5702	1020.12	65.5884	1020.12	65.5884	103.65
DUNCANGRADY-59	67.1454	34778.9	0.513339	16.1452	3.74791	0.938227	8.01575	0.109863	7.08558	0.883957	671.951	45.215	671.954	39.4181	671.981	80.2062	671.951	45.215	99.9955
DUNCANGRADY-65	93.6467	30753.2	1.14937	16.8496	3.12657	0.64078	7.80309	0.0783065	7.14932	0.916217	486.006	33.469	502.789	30.9521	579.883	67.9518	486.006	33.469	83.8111
DUNCANGRADY-79	31.147	7834.11	1.69647	13.3461	3.8302	1.62064	4.93415	0.15687	3.11054	0.63041	939.359	27.1902	978.238	30.9925	1066.59	77.0143	1066.59	77.0143	88.0709
DUNCANGRADY-72	23.4414	16005.3	1.69183	10.3652	6.05999	3.53575	6.41949	0.265802	2.1181	0.329948	1519.46	28.6721	1535.25	50.8541	1557.05	113.817	1557.05	113.817	97.5857
DUNCANGRADY-111	51.9446	31215.7	2.47475	14.3173	3.36723	1.56346	3.86456	0.162348	1.89647	0.490733	969.81	17.0755	955.837	23.937	923.833	69.2044	923.833	69.2044	104.977
DUNCANGRADY-85	47.7609	51440.9	1.8426	13.5676	4.69194	1.72408	5.0582	0.169652	1.88975	0.3736	1010.19	17.6695	1017.55	32.5171	1033.38	94.8715	1033.38	94.8715	97.7559
DUNCANGRADY-1	14.8861	20821.3	0.973445	11.5721	6.72062	2.67546	7.01404	0.224548	2.0075	0.286212	1305.86	23.7306	1321.7	51.8875	1347.46	129.885	1347.46	129.885	96.9131
DUNCANGRADY-92	48.9903	56445.3	0.555841	13.4033	5.21119	1.74744	5.29157	0.169869	0.91883	0.17364	1011.39	8.60062	1026.22	34.1864	1057.99	104.975	1057.99	104.975	95.5952
23--Elk City Sandstone, Oklahoma. ( 35°33'0.95"N 99°21'52.22"W)
OK-EC-1_Run1 13 Apr 2015 -Spot 33	774.562	10200.2	7.51649	7.56445	4.07803	0.710787	5.41986	0.0389956	3.56995	0.658679	246.604	8.63738	545.213	22.8684	2127.34	71.4307	246.604	8.63738	NA	discordant
OK-EC-1_Run1 13 Apr 2015 -Spot 90	166.161	24369.6	2.25553	18.1535	1.87399	0.311256	4.45228	0.0409805	4.03868	0.907105	258.908	10.2493	275.154	10.7315	415.687	41.8885	258.908	10.2493	NA
OK-EC-1 run 2-Spot 101	516.558	106870	5.67767	18.5717	1.28695	0.336748	1.94672	0.0453582	1.46065	0.750312	285.96	4.08559	294.705	4.97959	364.566	29.0091	285.96	4.08559	NA
OK-EC-1 run 2-Spot 19	457.81	54077.3	1.09259	18.5798	1.69674	0.355203	2.53849	0.0478649	1.88812	0.743798	301.4	5.55981	308.627	6.7559	363.578	38.263	301.4	5.55981	NA
OK-EC-1 run 2-Spot 13	231.646	45732.8	2.34808	19.1535	1.56424	0.352301	1.8726	0.0489396	1.02945	0.549746	308.008	3.09624	306.45	4.95357	294.599	35.6967	308.008	3.09624	NA
OK-EC-1_Run1 13 Apr 2015 -Spot 100	171.01	41215.6	2.65289	18.9075	3.07624	0.376844	3.73817	0.0516766	2.12384	0.568148	324.807	6.72746	324.713	10.3892	324.034	69.8615	324.807	6.72746	NA
OK-EC-1_Run1 13 Apr 2015 -Spot 18	330.205	53925.6	5.04948	18.1972	1.7128	0.445219	2.87792	0.0587595	2.31273	0.803612	368.077	8.27418	373.926	9.00244	410.305	38.311	368.077	8.27418	NA
OK-EC-1_Run1 13 Apr 2015 -Spot 86	538.081	23284.3	1.39058	11.3937	1.7668	0.71509	2.87553	0.0590913	2.26873	0.788976	370.097	8.16001	547.764	12.1743	1377.39	33.9679	370.097	8.16001	NA	discordant
OK-EC-1_Run1 13 Apr 2015 -Spot 22	215.695	54704.2	2.42449	18.4736	2.79658	0.447337	3.5854	0.0599357	2.24371	0.625791	375.234	8.17884	375.413	11.2525	376.491	62.9084	375.234	8.17884	NA
OK-EC-1 run 2-Spot 6	143.129	48734	0.80022	16.8338	3.2285	0.497366	3.57153	0.0607237	1.52729	0.427628	380.025	5.63631	409.918	12.0463	581.952	70.127	380.025	5.63631	NA
OK-EC-1 run 2-Spot 36	120.21	38671.2	1.95003	18.0724	2.09818	0.477164	2.50557	0.0625437	1.3695	0.546582	391.077	5.19657	396.126	8.21836	425.676	46.8226	391.077	5.19657	NA
OK-EC-1_Run1 13 Apr 2015 -Spot 89	87.1224	45626	0.759717	18.4266	1.76464	0.471585	3.17656	0.0630238	2.64132	0.831504	393.989	10.0949	392.283	10.3366	382.218	39.6452	393.989	10.0949	NA
OK-EC-1_Run1 13 Apr 2015 -Spot 70	453.645	26378.7	1.7181	12.4027	1.55555	0.708628	4.76032	0.0637433	4.49899	0.945103	398.35	17.3793	543.931	20.049	1212.38	30.6113	398.35	17.3793	NA	discordant
OK-EC-1 run 2-Spot 109	288.686	60767.5	1.51149	17.2719	1.75391	0.508995	2.26673	0.0637606	1.43592	0.633476	398.456	5.54826	417.773	7.76361	525.863	38.4376	398.456	5.54826	NA
OK-EC-1 run 2-Spot 21	162.329	35126.3	1.98432	18.3994	1.62521	0.478779	2.52832	0.0638906	1.93677	0.766031	399.243	7.49785	397.235	8.31197	385.545	36.4873	399.243	7.49785	NA
OK-EC-1_Run1 13 Apr 2015 -Spot 60	169.153	42360.8	10.3961	17.9556	2.3507	0.492341	3.61953	0.0641159	2.75231	0.760404	400.608	10.6904	406.505	12.1255	440.124	52.3149	400.608	10.6904	91.0216
OK-EC-1 run 2-Spot 72	330.729	94431.7	11.278	17.9408	1.28561	0.497857	1.90225	0.0647808	1.40205	0.73705	404.634	5.49881	410.251	6.42004	441.957	28.6178	404.634	5.49881	91.5552
OK-EC-1_Run1 13 Apr 2015 -Spot 110	95.1197	14514.4	1.5672	17.9565	2.84033	0.503891	3.66183	0.065623	2.31117	0.631152	409.732	9.17494	414.333	12.4586	440.017	63.2268	409.732	9.17494	93.1172
OK-EC-1 run 2-Spot 93	108.153	24030.6	1.4224	17.7035	2.16052	0.519266	2.60204	0.0666726	1.4501	0.557294	416.078	5.84297	424.661	9.0305	471.517	47.8149	416.078	5.84297	88.2423
OK-EC-1 run 2-Spot 84	208.24	125872	2.58067	17.9784	1.75109	0.512513	2.11222	0.0668276	1.18117	0.559208	417.015	4.76972	420.138	7.26745	437.297	38.9898	417.015	4.76972	95.3619
OK-EC-1_Run1 13 Apr 2015 -Spot 58	324.514	193846	4.41069	17.975	1.84011	0.516682	3.35962	0.0673584	2.81088	0.836667	420.221	11.4352	422.932	11.6217	437.718	40.9621	420.221	11.4352	96.0028
OK-EC-1_Run1 13 Apr 2015 -Spot 65	65.6235	58212.9	1.91354	17.4249	2.40527	0.572917	4.72544	0.0724037	4.06749	0.860764	450.621	17.7031	459.899	17.4784	506.496	52.9006	450.621	17.7031	88.9683
OK-EC-1 run 2-Spot 14	54.5031	133106	3.09843	17.8367	3.81617	0.563163	4.07285	0.072853	1.42301	0.349388	453.321	6.2292	453.583	14.9001	454.917	84.7285	453.321	6.2292	99.6493
OK-EC-1 run 2-Spot 65	88.5207	79013.5	2.8119	16.999	2.28659	0.60214	2.96414	0.074237	1.88617	0.63633	461.632	8.40273	478.591	11.3121	560.701	49.841	461.632	8.40273	82.3312
OK-EC-1_Run1 13 Apr 2015 -Spot 106	94.0571	31456.4	8.47016	17.6606	3.29872	0.583851	3.5408	0.0747838	1.28675	0.363406	464.912	5.77163	466.933	13.2539	476.885	72.9484	464.912	5.77163	97.4894
OK-EC-1_Run1 13 Apr 2015 -Spot 62	38.6156	4972.98	0.960948	18.9219	4.62495	0.55996	5.50244	0.0768458	2.98105	0.541769	477.268	13.7137	451.5	20.0579	322.332	105.095	477.268	13.7137	148.067
OK-EC-1 run 2-Spot 8	38.7954	56945.8	1.97842	16.9027	3.02026	0.653383	3.35775	0.0800979	1.46714	0.436942	496.707	7.01372	510.558	13.474	573.054	65.7005	496.707	7.01372	86.6771
OK-EC-1 run 2-Spot 1	40.0367	30691.6	0.977097	17.011	3.00888	0.69128	3.45063	0.0852868	1.68922	0.48954	527.602	8.55741	533.569	14.3217	559.185	65.6055	527.602	8.55741	94.3521
OK-EC-1 run 2-Spot 46	32.2646	129174	0.618058	16.8737	2.90124	0.715217	3.31899	0.0875282	1.61198	0.485684	540.902	8.36345	547.839	14.0534	576.816	63.0755	540.902	8.36345	93.7737
OK-EC-1 run 2-Spot 69	223.119	218458	5.2966	17.1241	1.32726	0.722977	1.69003	0.0897907	1.04623	0.61906	554.299	5.55693	552.423	7.20075	544.717	29.0176	554.299	5.55693	101.759
OK-EC-1 run 2-Spot 58	109.002	47484.6	1.89185	16.6183	2.06671	0.750025	2.52943	0.0903986	1.45833	0.576545	557.894	7.79383	568.239	11.0078	609.836	44.6769	557.894	7.79383	91.4826
OK-EC-1 run 2-Spot 73	125.551	204457	2.44218	16.8047	1.75522	0.779659	2.08123	0.0950241	1.11835	0.537352	585.182	6.25615	585.289	9.25827	585.723	38.0962	585.182	6.25615	99.9076
OK-EC-1 run 2-Spot 68	437.264	138956	2.89113	16.505	0.866765	0.794446	1.63346	0.0950995	1.38453	0.847603	585.626	7.75078	593.691	7.34312	624.609	18.7105	585.626	7.75078	93.7589
OK-EC-1 run 2-Spot 28	202.55	81655	1.29427	16.4683	1.5162	0.804537	1.90772	0.0960931	1.15781	0.606908	591.472	6.54335	599.385	8.63644	629.412	32.6474	591.472	6.54335	93.9721
OK-EC-1_Run1 13 Apr 2015 -Spot 80	271.559	49206.9	3.98814	17.1525	2.06562	0.773319	3.8267	0.0962021	3.22131	0.841799	592.113	18.2241	581.665	16.946	541.056	45.1796	592.113	18.2241	109.436
OK-EC-1 run 2-Spot 17	91.2426	26441.8	0.79884	16.4879	1.76005	0.813074	2.49685	0.0972284	1.77102	0.7093	598.146	10.1167	604.177	11.3699	626.847	37.9544	598.146	10.1167	95.4214
OK-EC-1 run 2-Spot 76	99.0559	42505.3	5.25613	16.4709	2.34701	0.820405	2.75875	0.098004	1.44991	0.525568	602.701	8.34256	608.274	12.6248	629.068	50.5585	602.701	8.34256	95.8085
OK-EC-1 run 2-Spot 38	194.88	52486.1	1.49994	16.3931	1.40178	0.837306	1.85292	0.0995508	1.21175	0.653967	611.776	7.07229	617.658	8.57431	639.294	30.1564	611.776	7.07229	95.6955
OK-EC-1 run 2-Spot 40	93.65	48296.6	1.98605	16.6179	1.74286	0.829961	2.22153	0.100031	1.37755	0.620091	614.588	8.07522	613.591	10.2309	609.89	37.6777	614.588	8.07522	100.77
OK-EC-1 run 2-Spot 67	108.092	68568.9	1.1604	16.4889	2.09681	0.843317	2.61464	0.100852	1.56196	0.59739	619.397	9.22449	620.975	12.1466	626.707	45.2202	619.397	9.22449	98.8336
OK-EC-1 run 2-Spot 57	423.979	138001	1.49146	16.6624	0.845203	0.836275	1.51126	0.101061	1.25281	0.828985	620.626	7.41271	617.088	6.98855	604.11	18.2667	620.626	7.41271	102.734
OK-EC-1_Run1 13 Apr 2015 -Spot 103	164.224	55324.4	2.55157	16.4349	1.52841	0.851846	4.4542	0.101538	4.18376	0.939284	623.414	24.8608	625.662	20.8073	633.818	32.9189	623.414	24.8608	98.3585
OK-EC-1_Run1 13 Apr 2015 -Spot 109	265.945	53798.2	0.845677	16.6624	1.57864	0.845106	2.24472	0.102129	1.59582	0.710924	626.872	9.53277	621.959	10.4399	604.105	34.1563	626.872	9.53277	103.769
OK-EC-1_Run1 13 Apr 2015 -Spot 69	126.615	36936.9	7.26978	16.2031	1.87889	0.872386	2.77951	0.102519	2.04829	0.736922	629.155	12.278	636.862	13.1503	664.326	40.25	629.155	12.278	94.7058
OK-EC-1 run 2-Spot 42	120.15	57799.6	1.29595	16.6402	1.57814	0.858383	2.07776	0.103595	1.3515	0.650462	635.443	8.17834	629.24	9.74505	606.988	34.1502	635.443	8.17834	104.688
OK-EC-1 run 2-Spot 54	157.521	200348	1.75089	16.3053	1.44198	0.87954	2.10972	0.104012	1.54	0.729956	637.876	9.35293	640.734	10.0247	650.838	30.9583	637.876	9.35293	98.0085
OK-EC-1 run 2-Spot 10	146.344	72483.4	2.17584	16.5232	1.87136	0.87666	2.19623	0.105057	1.14953	0.523411	643.975	7.04495	639.177	10.4176	622.233	40.3695	643.975	7.04495	103.494
OK-EC-1_Run1 13 Apr 2015 -Spot 104	197.745	115366	2.33903	16.4592	1.40425	0.88529	3.59687	0.10568	3.31143	0.920641	647.611	20.4032	643.836	17.1516	630.635	30.2509	647.611	20.4032	102.692
OK-EC-1 run 2-Spot 55	191.791	50250.8	1.05423	15.9148	1.42871	0.927486	1.8425	0.107055	1.16344	0.631447	655.624	7.25273	666.311	9.00252	702.652	30.4118	655.624	7.25273	93.3071
OK-EC-1 run 2-Spot 60	55.2337	46814.4	2.34012	16.107	1.44864	0.917445	2.05036	0.107175	1.451	0.707681	656.319	9.05444	661.008	9.96163	677.032	30.9671	656.319	9.05444	96.9405
OK-EC-1_Run1 13 Apr 2015 -Spot 39	126.827	57546.3	19.0542	15.2187	2.07874	0.975375	5.06852	0.107658	4.62264	0.912029	659.133	28.9636	691.23	25.417	797.093	43.5998	659.133	28.9636	82.6921
OK-EC-1 run 2-Spot 90	80.0405	74644.7	2.15009	16.259	1.97626	0.920784	2.29076	0.10858	1.15844	0.505702	664.498	7.31436	662.775	11.1508	656.91	42.3882	664.498	7.31436	101.155
OK-EC-1 run 2-Spot 18	129.105	73038.1	1.94235	16.0808	1.34595	1.00238	1.84532	0.116906	1.2624	0.684106	712.733	8.51796	705.016	9.37993	680.488	28.7345	712.733	8.51796	104.739
OK-EC-1 run 2-Spot 23	170.196	56863.7	3.2366	15.2606	1.54318	1.17619	2.0295	0.130181	1.31812	0.649483	788.897	9.78756	789.536	11.1382	791.322	32.4015	788.897	9.78756	99.6936
OK-EC-1 run 2-Spot 4	65.0472	102979	2.72374	15.283	2.24383	1.22875	2.67129	0.136197	1.44949	0.542619	823.123	11.2008	813.767	14.9549	788.249	47.1288	823.123	11.2008	104.424
OK-EC-1_Run1 13 Apr 2015 -Spot 98	211.008	100380	5.67572	14.3162	1.5359	1.5114	2.60456	0.15693	2.1035	0.807624	939.695	18.3934	935.005	15.9171	923.989	31.5441	923.989	31.5441	101.7
OK-EC-1_Run1 13 Apr 2015 -Spot 87	21.2293	18080.9	2.0012	14.3095	3.75551	1.45614	4.42203	0.151121	2.33464	0.527956	907.246	19.758	912.415	26.6257	924.961	77.1794	924.961	77.1794	98.0849
OK-EC-1 run 2-Spot 64	65.2918	51081.9	1.2587	14.2381	1.58137	1.55014	2.13637	0.160074	1.43643	0.672371	957.188	12.7773	950.549	13.1868	935.226	32.4479	935.226	32.4479	102.348
OK-EC-1 run 2-Spot 106	109.106	60888.5	3.51339	13.7762	1.15446	1.76873	2.10912	0.176722	1.76511	0.836894	1049.04	17.0886	1034.05	13.6816	1002.48	23.4367	1002.48	23.4367	104.645
OK-EC-1 run 2-Spot 62	226.397	220757	5.42956	13.7361	1.08149	1.73513	1.46943	0.17286	0.99479	0.676989	1027.85	9.45146	1021.66	9.46557	1008.4	21.916	1008.4	21.916	101.929
OK-EC-1_Run1 13 Apr 2015 -Spot 1	190.01	175868	4.96894	13.6802	1.53387	1.78538	2.32922	0.177142	1.75286	0.75255	1051.34	17.0043	1040.14	15.1607	1016.65	31.0833	1016.65	31.0833	103.412
OK-EC-1 run 2-Spot 32	161.966	146460	3.67643	13.672	1.07568	1.75404	1.51479	0.173928	1.06654	0.704086	1033.72	10.1865	1028.65	9.79637	1017.88	21.7789	1017.88	21.7789	101.556
OK-EC-1 run 2-Spot 61	119.068	59237.9	3.67723	13.57	1.09469	1.73428	1.60754	0.170687	1.17722	0.73231	1015.9	11.0646	1021.34	10.3534	1033.02	22.1399	1033.02	22.1399	98.3424
OK-EC-1_Run1 13 Apr 2015 -Spot 3	54.5052	27438.8	1.13011	13.4372	2.13304	1.80242	2.80455	0.175656	1.82089	0.649263	1043.2	17.5382	1046.33	18.3173	1052.91	42.9872	1052.91	42.9872	99.0774
OK-EC-1 run 2-Spot 88	673.274	168122	5.73415	13.389	0.952607	1.68914	1.81987	0.164025	1.55063	0.852058	979.107	14.0856	1004.44	11.6076	1060.15	19.1732	1060.15	19.1732	92.3559
OK-EC-1 run 2-Spot 39	82.3954	94199.5	1.49318	13.3248	1.65759	1.77571	2.33959	0.171605	1.65108	0.705714	1020.95	15.5897	1036.61	15.1985	1069.81	33.3241	1069.81	33.3241	95.4326
OK-EC-1 run 2-Spot 104	166.507	66589.3	3.42505	13.2633	1.29448	1.85099	2.07242	0.178055	1.6184	0.780926	1056.34	15.7687	1063.78	13.6629	1079.09	25.9587	1079.09	25.9587	97.8917
OK-EC-1 run 2-Spot 89	59.5607	41851.1	2.1719	13.1979	1.646	1.94102	2.34124	0.185796	1.66496	0.711146	1098.56	16.817	1095.35	15.6907	1088.97	32.9653	1088.97	32.9653	100.881
OK-EC-1 run 2-Spot 15	126.531	81429.5	2.6942	13.1961	1.6073	1.84717	1.7376	0.176788	0.660179	0.379937	1049.4	6.39344	1062.42	11.447	1089.28	32.2065	1089.28	32.2065	96.3397
OK-EC-1 run 2-Spot 56	45.1824	159022	1.61924	13.1524	1.58298	1.91585	2.24681	0.182753	1.59447	0.709659	1082	15.8821	1086.63	14.9908	1095.89	31.6702	1095.89	31.6702	98.7321
OK-EC-1 run 2-Spot 108	70.4034	72709	1.55807	13.1321	1.40814	1.93811	1.95638	0.184591	1.35815	0.694216	1092.01	13.643	1094.35	13.1044	1099.01	28.1559	1099.01	28.1559	99.3628
OK-EC-1 run 2-Spot 22	116.779	173210	2.31719	13.1302	1.42491	1.96507	1.92114	0.187133	1.28857	0.670731	1105.82	13.0941	1103.62	12.9287	1099.26	28.509	1099.26	28.509	100.597
OK-EC-1_Run1 13 Apr 2015 -Spot 56	205	125864	3.83106	13.1119	1.37059	1.88851	3.4759	0.17959	3.19427	0.918977	1064.73	31.3505	1077.06	23.079	1102.1	27.3935	1102.1	27.3935	96.6093
OK-EC-1 run 2-Spot 9	332.978	72142.4	3.28268	13.0291	1.00693	1.83657	2.14364	0.173548	1.89243	0.88281	1031.63	18.0409	1058.63	14.0937	1114.72	20.081	1114.72	20.081	92.546
OK-EC-1 run 2-Spot 79	150.014	78733.7	6.07211	12.9982	1.06747	2.05093	2.00375	0.193346	1.69574	0.846284	1139.47	17.7112	1132.61	13.6779	1119.48	21.2933	1119.48	21.2933	101.786
OK-EC-1_Run1 13 Apr 2015 -Spot 97	323.841	219911	2.69634	12.9893	0.98049	1.96904	2.11468	0.185497	1.87364	0.886014	1096.94	18.8992	1104.98	14.2411	1120.86	19.5656	1120.86	19.5656	97.8656
OK-EC-1_Run1 13 Apr 2015 -Spot 77	430.648	52855.8	4.32769	12.9356	1.40411	1.80633	2.21248	0.169466	1.70983	0.772813	1009.17	15.9723	1047.75	14.4609	1129.1	27.9695	1129.1	27.9695	89.3781
OK-EC-1 run 2-Spot 103	78.2705	74674.6	3.24093	12.9235	1.47176	2.14412	1.99852	0.200968	1.35204	0.67652	1180.52	14.5848	1163.15	13.8393	1130.95	29.2905	1130.95	29.2905	104.383
OK-EC-1_Run1 13 Apr 2015 -Spot 72	166.625	84838.7	4.87343	12.6773	1.52603	2.20198	2.16106	0.20246	1.53016	0.708063	1188.52	16.6083	1181.67	15.0912	1169.13	30.222	1169.13	30.222	101.659
OK-EC-1_Run1 13 Apr 2015 -Spot 82	219.287	50210.5	3.66612	12.5161	1.60144	2.21129	2.48884	0.200729	1.90518	0.76549	1179.24	20.5316	1184.62	17.4035	1194.47	31.598	1194.47	31.598	98.7244
OK-EC-1 run 2-Spot 94	17.7354	17438.1	1.35192	12.505	2.26313	2.19865	2.68576	0.199406	1.44623	0.53848	1172.13	15.4999	1180.61	18.7472	1196.18	44.6434	1196.18	44.6434	97.9893
OK-EC-1 run 2-Spot 50	242.769	232384	1.39542	12.329	1.2353	2.18405	1.81832	0.195293	1.33428	0.7338	1149.99	14.0534	1175.97	12.665	1224.09	24.2737	1224.09	24.2737	93.9465
OK-EC-1_Run1 13 Apr 2015 -Spot 55	198.417	371409	2.07716	12.2511	1.22591	2.31658	5.14049	0.205837	4.99217	0.971147	1206.6	54.9354	1217.38	36.4736	1236.56	24.036	1236.56	24.036	97.5772
OK-EC-1 run 2-Spot 34	175.776	194030	1.93243	12.2487	1.07426	2.33535	1.73081	0.207463	1.35708	0.784073	1215.29	15.0311	1223.11	12.3058	1236.94	21.0651	1236.94	21.0651	98.2494
OK-EC-1 run 2-Spot 102	121.121	71729.9	2.98237	11.9835	1.40194	2.52649	1.82587	0.219584	1.16977	0.640667	1279.67	13.5772	1279.69	13.2831	1279.7	27.3247	1279.7	27.3247	99.9977
OK-EC-1 run 2-Spot 52	146.607	99385.9	1.81738	11.9672	1.39696	2.46666	1.89396	0.214093	1.2789	0.675253	1250.59	14.5381	1262.32	13.6844	1282.35	27.2174	1282.35	27.2174	97.5233
OK-EC-1_Run1 13 Apr 2015 -Spot 107	237.259	164789	2.78654	11.7601	0.997068	2.67801	2.98767	0.228413	2.81639	0.94267	1326.18	33.7591	1322.41	22.0918	1316.29	19.3326	1316.29	19.3326	100.751
OK-EC-1 run 2-Spot 87	162.781	468056	2.51309	11.6503	0.883091	2.6987	1.70427	0.228028	1.45763	0.855282	1324.16	17.4481	1328.1	12.6269	1334.45	17.0799	1334.45	17.0799	99.2284
OK-EC-1_Run1 13 Apr 2015 -Spot 91	117.169	162452	3.11334	11.6246	1.68346	2.85308	2.78652	0.240542	2.22051	0.796875	1389.52	27.7558	1369.62	20.9537	1338.71	32.5411	1338.71	32.5411	103.795
OK-EC-1_Run1 13 Apr 2015 -Spot 71	93.8078	99265.2	3.63634	11.5835	1.48314	2.73198	2.34873	0.229518	1.82122	0.775406	1331.97	21.9162	1337.2	17.46	1345.55	28.6418	1345.55	28.6418	98.9911
OK-EC-1 run 2-Spot 5	116.633	213520	3.37057	11.4555	1.07222	2.86217	1.51556	0.237798	1.07111	0.706743	1375.24	13.2652	1372.02	11.4048	1366.98	20.643	1366.98	20.643	100.604
OK-EC-1_Run1 13 Apr 2015 -Spot 24	120.798	130600	2.84647	11.4372	1.34893	2.83163	1.93819	0.234886	1.39175	0.718066	1360.06	17.0651	1363.96	14.5448	1370.05	25.9596	1370.05	25.9596	99.2704
OK-EC-1_Run1 13 Apr 2015 -Spot 99	218.502	222151	3.09352	11.3893	0.898306	2.88787	1.8688	0.238547	1.63874	0.876893	1379.14	20.3466	1378.75	14.0957	1378.13	17.2686	1378.13	17.2686	100.073
OK-EC-1 run 2-Spot 30	104.956	184059	3.27955	11.3718	1.06298	2.95558	1.44593	0.243765	0.980199	0.677901	1406.24	12.3841	1396.28	10.9705	1381.09	20.4259	1381.09	20.4259	101.821
OK-EC-1 run 2-Spot 37	75.7999	103887	3.26474	11.1712	1.183	3.10905	1.70176	0.251899	1.22331	0.718849	1448.26	15.8676	1434.93	13.0749	1415.2	22.6255	1415.2	22.6255	102.336
OK-EC-1 run 2-Spot 107	214.451	50437.4	2.97392	11.1003	1.27504	2.98855	2.06279	0.240599	1.62153	0.786087	1389.81	20.2725	1404.71	15.6951	1427.37	24.3457	1427.37	24.3457	97.3686
OK-EC-1_Run1 13 Apr 2015 -Spot 53	252.632	92638.7	5.95987	11.0884	1.77607	3.15816	7.13859	0.25398	6.91412	0.968555	1458.97	90.2802	1446.99	55.1063	1429.42	33.9042	1429.42	33.9042	102.067
OK-EC-1_Run1 13 Apr 2015 -Spot 45	125.948	108003	2.87604	10.9156	1.6975	3.31197	2.33466	0.2622	1.60286	0.686548	1501.09	21.4644	1483.87	18.21	1459.34	32.2734	1459.34	32.2734	102.861
OK-EC-1 run 2-Spot 35	47.681	113189	1.51613	10.8974	1.45032	3.30602	2.08503	0.261293	1.49797	0.71844	1496.46	20.0048	1482.47	16.2558	1462.5	27.5618	1462.5	27.5618	102.322
OK-EC-1 run 2-Spot 105	252.736	42228.1	2.75385	10.8247	1.39761	2.66951	2.30573	0.209579	1.83387	0.795353	1226.57	20.4834	1320.06	17.0335	1475.22	26.5146	1475.22	26.5146	83.1453
OK-EC-1_Run1 13 Apr 2015 -Spot 25	79.0104	126222	1.81749	10.8155	1.84983	3.3215	2.66187	0.260542	1.91407	0.71907	1492.62	25.5035	1486.12	20.7767	1476.84	35.0876	1476.84	35.0876	101.068
OK-EC-1 run 2-Spot 45	179.13	61319	2.06353	10.8121	0.917489	3.38174	1.55012	0.265185	1.24943	0.806024	1516.32	16.8822	1500.17	12.1481	1477.43	17.4004	1477.43	17.4004	102.632
OK-EC-1 run 2-Spot 11	437.013	67659.6	1.67516	10.792	1.04858	2.63348	1.90555	0.206125	1.5911	0.834983	1208.14	17.5289	1310.04	14.0244	1480.95	19.8773	1480.95	19.8773	81.5787
OK-EC-1 run 2-Spot 27	164.112	619513	1.86265	10.6402	0.723541	3.39249	1.51697	0.261798	1.33329	0.878921	1499.04	17.8329	1502.66	11.8969	1507.76	13.665	1507.76	13.665	99.4213
OK-EC-1_Run1 13 Apr 2015 -Spot 96	71.2592	29847.1	1.97375	10.5696	1.05309	3.40414	2.4096	0.260955	2.1673	0.899442	1494.72	28.9138	1505.35	18.9135	1520.32	19.8569	1520.32	19.8569	98.3165
OK-EC-1_Run1 13 Apr 2015 -Spot 27	268.153	61144.2	1.33371	10.5569	1.22759	3.21923	2.37774	0.246482	2.03634	0.856418	1420.31	25.9579	1461.8	18.423	1522.6	23.1406	1522.6	23.1406	93.2818
OK-EC-1 run 2-Spot 85	93.3206	169338	2.14981	10.3577	1.07354	3.71863	1.6243	0.279347	1.21895	0.750451	1588.07	17.1578	1575.39	12.9983	1558.42	20.1409	1558.42	20.1409	101.903
OK-EC-1_Run1 13 Apr 2015 -Spot 75	101.534	184044	1.85251	10.2507	1.76638	3.78183	2.41538	0.281161	1.64742	0.682053	1597.21	23.3064	1588.9	19.3989	1577.87	33.0578	1577.87	33.0578	101.226
OK-EC-1_Run1 13 Apr 2015 -Spot 2	157.263	69878.2	2.0265	10.1659	1.25034	2.99941	3.35843	0.221147	3.117	0.928113	1287.93	36.3893	1407.47	25.5798	1593.39	23.3513	1593.39	23.3513	80.8296
OK-EC-1_Run1 13 Apr 2015 -Spot 76	142.57	33927.2	5.13466	10.1395	2.33952	3.30017	2.99616	0.24269	1.8718	0.624733	1400.67	23.5651	1481.09	23.3519	1598.26	43.6695	1598.26	43.6695	87.6371
OK-EC-1_Run1 13 Apr 2015 -Spot 84	250.255	143962	1.4154	9.97233	1.47029	3.92746	2.74865	0.284058	2.32235	0.844906	1611.77	33.1186	1619.36	22.2488	1629.22	27.3329	1629.22	27.3329	98.9289
OK-EC-1 run 2-Spot 97	266.796	252867	11.2468	9.94573	0.964154	3.86133	1.59917	0.27853	1.27583	0.79781	1583.95	17.9174	1605.64	12.8982	1634.18	17.9112	1634.18	17.9112	96.9265
OK-EC-1 run 2-Spot 66	534.313	128150	2.86123	9.91197	0.693466	3.69176	1.35336	0.265395	1.16219	0.858744	1517.38	15.7131	1569.59	10.8133	1640.5	12.8732	1640.5	12.8732	92.4955
OK-EC-1_Run1 13 Apr 2015 -Spot 35	355.072	270944	1.88665	9.91046	1.64582	3.83129	4.7499	0.275384	4.45565	0.938051	1568.07	62.0211	1599.34	38.265	1640.78	30.5495	1640.78	30.5495	95.5687
OK-EC-1_Run1 13 Apr 2015 -Spot 85	130.384	56298.5	1.96855	9.89732	1.20119	4.11725	2.29315	0.295545	1.95338	0.851832	1669.18	28.7262	1657.73	18.7362	1643.24	22.2893	1643.24	22.2893	101.578
OK-EC-1_Run1 13 Apr 2015 -Spot 66	57.4417	24698.5	1.55271	9.89573	1.40043	3.99345	2.24907	0.286612	1.75987	0.782486	1624.58	25.2725	1632.86	18.2654	1643.54	25.9843	1643.54	25.9843	98.8463
OK-EC-1 run 2-Spot 70	115.918	128112	2.14242	9.86553	0.978259	4.2367	1.7373	0.303142	1.4357	0.826395	1706.87	21.5297	1681.16	14.2726	1649.21	18.1381	1649.21	18.1381	103.496
OK-EC-1_Run1 13 Apr 2015 -Spot 101	157.641	247412	2.70389	9.83699	1.2311	4.12291	3.04993	0.294147	2.79042	0.914914	1662.22	40.886	1658.85	24.9284	1654.58	22.8112	1654.58	22.8112	100.462
OK-EC-1 run 2-Spot 83	60.1336	74688.4	1.25636	9.83205	1.02781	4.20645	1.69423	0.299956	1.34685	0.794964	1691.09	20.034	1675.28	13.8996	1655.51	19.0417	1655.51	19.0417	102.149
OK-EC-1 run 2-Spot 47	183.26	42511.2	2.59568	9.75631	0.821776	3.4926	1.46618	0.247135	1.21423	0.828161	1423.68	15.511	1525.54	11.5741	1669.82	15.1963	1669.82	15.1963	85.2596
OK-EC-1_Run1 13 Apr 2015 -Spot 46	152.338	81762.7	2.23494	9.71703	2.11559	3.994	3.79544	0.281475	3.15114	0.830243	1598.79	44.6193	1632.98	30.8308	1677.28	39.0891	1677.28	39.0891	95.3203
OK-EC-1_Run1 13 Apr 2015 -Spot 108	27.8503	92829.8	2.76071	9.71644	1.41896	4.2235	3.14791	0.297631	2.80997	0.892643	1679.55	41.5482	1678.6	25.8498	1677.39	26.2146	1677.39	26.2146	100.129
OK-EC-1_Run1 13 Apr 2015 -Spot 102	268.36	187413	2.29703	9.56776	1.41067	4.40915	3.68706	0.305959	3.40652	0.923913	1720.79	51.4485	1714.06	30.5258	1705.83	25.9695	1705.83	25.9695	100.877
OK-EC-1 run 2-Spot 2	137.678	290436	1.20557	9.46928	0.958663	4.22718	1.67033	0.290313	1.36783	0.8189	1643.09	19.8391	1679.31	13.7164	1724.85	17.605	1724.85	17.605	95.2599
OK-EC-1 run 2-Spot 110	182.453	66007.6	5.21331	9.42551	0.720351	4.48331	1.2705	0.30648	1.04654	0.823729	1723.36	15.8262	1727.89	10.5481	1733.36	13.2139	1733.36	13.2139	99.4235
OK-EC-1 run 2-Spot 86	93.7728	187947	1.80192	9.33357	1.20651	4.69274	1.74399	0.317668	1.25929	0.722076	1778.33	19.571	1765.95	14.5985	1751.31	22.0841	1751.31	22.0841	101.543
OK-EC-1 run 2-Spot 24	352.913	126607	3.26399	9.3156	0.870973	4.45078	1.68795	0.300708	1.44588	0.856591	1694.82	21.5485	1721.84	13.9957	1754.84	15.9346	1754.84	15.9346	96.5796
OK-EC-1 run 2-Spot 71	194.231	197531	1.65313	9.3075	0.973569	4.49783	1.40573	0.303623	1.01403	0.72135	1709.25	15.2248	1730.57	11.6779	1756.43	17.8084	1756.43	17.8084	97.3138
OK-EC-1 run 2-Spot 48	79.2595	94252	2.88671	9.21071	1.08582	4.78518	1.67769	0.319662	1.27892	0.762312	1788.08	19.9706	1782.3	14.0913	1775.53	19.8149	1775.53	19.8149	100.706
OK-EC-1_Run1 13 Apr 2015 -Spot 52	170.565	37556	1.61322	9.20875	1.99539	4.31886	6.43103	0.288449	6.11364	0.950647	1633.77	88.2362	1696.97	53.0709	1775.92	36.4143	1775.92	36.4143	91.9958
OK-EC-1 run 2-Spot 92	145.544	51649.9	0.915886	9.17125	1.56366	4.72336	2.25249	0.31418	1.62132	0.71979	1761.24	24.9869	1771.39	18.8774	1783.36	28.5092	1783.36	28.5092	98.7599
OK-EC-1 run 2-Spot 91	62.6304	47613.3	2.86306	9.17089	0.979948	4.85542	1.4371	0.322951	1.05117	0.731453	1804.13	16.5419	1794.55	12.1006	1783.43	17.8652	1783.43	17.8652	101.16
OK-EC-1 run 2-Spot 20	47.0142	210661	0.930152	9.112	1.10423	4.76956	1.73105	0.315203	1.33311	0.770121	1766.26	20.5961	1779.56	14.5313	1795.17	20.1023	1795.17	20.1023	98.3897
OK-EC-1 run 2-Spot 80	304.316	253046	1.73891	9.09978	1.0232	4.71564	1.49626	0.311222	1.09173	0.729637	1746.72	16.7043	1770.02	12.5353	1797.61	18.6212	1797.61	18.6212	97.1688
OK-EC-1 run 2-Spot 95	121.182	149601	1.67622	8.97637	1.19737	5.03913	1.7905	0.328061	1.33124	0.743499	1828.98	21.1988	1825.92	15.1711	1822.42	21.7255	1822.42	21.7255	100.36
OK-EC-1 run 2-Spot 74	183.298	106512	4.60742	8.92841	1.02415	4.72916	1.6676	0.306236	1.31606	0.789193	1722.16	19.8897	1772.42	13.9779	1832.14	18.56	1832.14	18.56	93.9973
OK-EC-1_Run1 13 Apr 2015 -Spot 19	24.0518	55943.7	1.74811	8.82736	1.76777	5.16666	2.95465	0.330781	2.36748	0.801273	1842.16	37.9353	1847.14	25.1411	1852.74	31.9592	1852.74	31.9592	99.4292
OK-EC-1 run 2-Spot 96	216.77	202421	1.84278	8.81325	0.931435	5.30279	1.62092	0.338953	1.32658	0.818411	1881.63	21.6485	1869.31	13.8481	1855.63	16.8315	1855.63	16.8315	101.401
OK-EC-1_Run1 13 Apr 2015 -Spot 26	132.668	191003	4.02575	8.79872	1.4496	5.08852	2.29024	0.324721	1.77309	0.774195	1812.74	28.018	1834.19	19.4376	1858.61	26.1874	1858.61	26.1874	97.5321
OK-EC-1_Run1 13 Apr 2015 -Spot 73	66.4467	46509.7	2.6887	8.72604	1.33624	5.30051	2.07175	0.335455	1.58324	0.764201	1864.77	25.6372	1868.95	17.6992	1873.58	24.0937	1873.58	24.0937	99.5296
OK-EC-1_Run1 13 Apr 2015 -Spot 79	161.282	217970	1.2533	8.62311	1.19186	5.20924	2.32184	0.32579	1.99259	0.858194	1817.94	31.5647	1854.13	19.7812	1894.95	21.4367	1894.95	21.4367	95.9363
OK-EC-1_Run1 13 Apr 2015 -Spot 64	101.939	177965	1.57537	8.49125	1.06543	4.93754	2.37287	0.304075	2.12023	0.89353	1711.48	31.8701	1808.7	20.0385	1922.62	19.0994	1922.62	19.0994	89.0184
OK-EC-1 run 2-Spot 77	495.07	79578.3	10.2039	8.34068	0.817374	5.75116	1.28139	0.347901	0.986846	0.770136	1924.57	16.4197	1939.09	11.0842	1954.63	14.5967	1954.63	14.5967	98.462
OK-EC-1_Run1 13 Apr 2015 -Spot 74	439.522	366662	2.93878	8.3316	1.0553	5.42157	2.09476	0.327606	1.80952	0.863831	1826.77	28.785	1888.27	17.9594	1956.58	18.8421	1956.58	18.8421	93.3657
OK-EC-1_Run1 13 Apr 2015 -Spot 21	153.973	135774	1.16284	8.31199	1.01269	6.03167	1.92689	0.363614	1.63932	0.850759	1999.28	28.1796	1980.43	16.7844	1960.78	18.0722	1960.78	18.0722	101.964
OK-EC-1_Run1 13 Apr 2015 -Spot 83	351.579	232789	20.4987	7.90903	1.07243	6.01345	2.18341	0.344942	1.90188	0.871062	1910.4	31.4447	1977.79	19.0111	2049.01	18.944	2049.01	18.944	93.2354
OK-EC-1 run 2-Spot 3	221.221	233180	4.66884	7.84065	0.783569	6.69538	1.62032	0.380738	1.41826	0.875296	2079.73	25.2111	2072.01	14.3155	2064.33	13.8164	2064.33	13.8164	100.746
OK-EC-1 run 2-Spot 25	523.058	366975	8.31333	7.83999	0.893563	6.24514	1.46261	0.355105	1.15792	0.791681	1958.93	19.5607	2010.79	12.802	2064.48	15.756	2064.48	15.756	94.8873
OK-EC-1 run 2-Spot 78	19.3651	29295.5	0.854103	7.67491	2.28004	6.67266	2.74519	0.371425	1.52888	0.556933	2036.1	26.6928	2069.01	24.2458	2101.92	40.0394	2101.92	40.0394	96.8685
OK-EC-1_Run1 13 Apr 2015 -Spot 54	239.623	148453	3.56308	7.6604	1.47228	6.4316	5.51917	0.35733	5.31918	0.963764	1969.5	90.2765	2036.6	48.5368	2105.25	25.8434	2105.25	25.8434	93.5521
OK-EC-1 run 2-Spot 41	121.111	163543	3.32993	7.5509	1.26206	7.23034	1.69498	0.395965	1.13145	0.667528	2150.43	20.6889	2140.25	15.1206	2130.48	22.0879	2130.48	22.0879	100.937
OK-EC-1_Run1 13 Apr 2015 -Spot 9	29.6797	22121	5.81887	6.52767	5.93281	7.50118	7.88444	0.355129	5.19289	0.658626	1959.05	87.7325	2173.13	70.7544	2381.88	101.168	2381.88	101.168	82.248
OK-EC-1 run 2-Spot 26	177.961	102238	2.04388	5.87743	0.769249	11.3723	1.47387	0.484767	1.2572	0.852993	2548	26.4607	2554.15	13.7567	2559.03	12.8726	2559.03	12.8726	99.5689
OK-EC-1_Run1 13 Apr 2015 -Spot 61	125.001	87895.3	1.67536	5.77413	1.14349	11.7129	3.28772	0.490514	3.08246	0.937567	2572.9	65.3952	2581.73	30.7665	2588.66	19.0815	2588.66	19.0815	99.391
OK-EC-1 run 2-Spot 7	107.968	289279	0.981156	5.31794	0.917465	13.6639	1.47318	0.527009	1.15262	0.782399	2728.84	25.6437	2726.7	13.9392	2725.11	15.1118	2725.11	15.1118	100.137
OK-EC-1 run 2-Spot 29	51.2204	130647	1.71945	5.31597	1.03235	13.8459	1.6289	0.533829	1.25999	0.773522	2757.57	28.2693	2739.22	15.4267	2725.72	17.0037	2725.72	17.0037	101.168
OK-EC-1_Run1 13 Apr 2015 -Spot 105	69.845	92021.1	2.78802	5.29998	0.925736	13.6423	2.19626	0.524398	1.99163	0.906826	2717.81	44.1668	2725.2	20.7804	2730.68	15.2403	2730.68	15.2403	99.5286
OK-EC-1_Run1 13 Apr 2015 -Spot 67	120.991	1.17103e+06	3.61079	4.83061	1.27639	15.5855	1.94907	0.546035	1.47299	0.75574	2808.66	33.5369	2851.73	18.5993	2882.3	20.7283	2882.3	20.7283	97.4452
OK-EC-1 run 2-Spot 98	102.537	265448	3.16435	4.63899	0.931223	17.4201	1.48584	0.586102	1.15782	0.779236	2973.6	27.5807	2958.26	14.2689	2947.83	15.0353	2947.83	15.0353	100.874
OK-EC-1 run 2-Spot 53	64.9755	153448	2.63846	3.62853	0.892434	26.096	1.61734	0.686758	1.34884	0.833983	3370.24	35.4024	3350.14	15.8174	3338.13	13.9581	3338.13	13.9581	100.962
25a--Marlow Sandstone, Oklahoma. ( 35°45'2.23"N 98°23'51.97"W)
OK_MRLW_1_Run1-Spot 35	1419.07	51967.1	4.58686	19.2306	1.32706	0.34327	1.94524	0.0478771	1.42228	0.731158	301.475	4.18909	299.647	5.04753	285.409	30.3314	301.475	4.18909	NA
OK_MRLW_1_Run1-Spot 88	389.678	34117.1	0.3443	19.1276	1.78697	0.365181	2.38537	0.0506604	1.58009	0.662411	318.575	4.91142	316.076	6.47902	297.694	40.7673	318.575	4.91142	NA
OK_MRLW_1_Run1-Spot 14	815.566	222439	1.34821	18.3721	1.972	0.387405	2.63837	0.0516206	1.75277	0.66434	324.463	5.54636	332.472	7.48057	388.874	44.2551	324.463	5.54636	NA
OK_MRLW_1_Run1-Spot 94	1119.18	149492	127.984	18.3269	1.49712	0.39962	2.91094	0.053117	2.49644	0.857605	333.63	8.11701	341.372	8.43937	394.408	33.5795	333.63	8.11701	NA
OK_MRLW_1_Run1-Spot 11	1665.95	45013.8	6.24726	16.2499	1.67111	0.452392	2.37531	0.0533168	1.68805	0.710663	334.853	5.50817	378.953	7.51259	658.143	35.8492	334.853	5.50817	NA
OK_MRLW_1_Run1-Spot 52	705.152	56316.1	6.22462	18.5283	1.8538	0.401844	2.94719	0.0539998	2.29114	0.7774	339.031	7.56697	342.985	8.57839	369.838	41.7389	339.031	7.56697	NA
OK_MrLW_1_Run2-Spot 134	173.313	33831.3	1.21663	18.1492	2.72171	0.410776	3.5018	0.0540707	2.20337	0.629212	339.465	7.28615	349.434	10.3534	416.215	60.8074	339.465	7.28615	NA
OK_MRLW_1_Run1-Spot 86	876.639	83586.8	5.3397	17.596	1.9307	0.433551	2.5504	0.055329	1.6664	0.653391	347.156	5.63202	365.695	7.832	485.002	42.651	347.156	5.63202	NA
OK_MrLW_1_Run2-Spot 113	845.21	80426.5	2.63468	18.5974	1.82132	0.43693	3.03166	0.0589336	2.42358	0.799424	369.137	8.69503	368.085	9.3605	361.445	41.0677	369.137	8.69503	NA
OK_MrLW_1_Run2-Spot 179	545.104	40642.5	1.1711	17.4199	2.81526	0.468363	3.13721	0.0591735	1.38434	0.441265	370.597	4.98565	390.058	10.161	507.128	61.9505	370.597	4.98565	NA
OK_MrLW_1_Run2-Spot 115	279.042	28325.6	2.63967	18.0311	1.96867	0.459056	3.14065	0.0600325	2.44704	0.779152	375.823	8.93361	383.601	10.0336	430.784	43.8807	375.823	8.93361	NA
OK_MRLW_1_Run1-Spot 80	286.641	54549.8	4.24915	18.6304	2.4203	0.447981	3.2184	0.0605314	2.12138	0.659141	378.857	7.80537	375.865	10.1107	357.447	54.6351	378.857	7.80537	NA
OK_MRLW_1_Run1-Spot 71	282.61	220914	0.739793	18.7143	2.8096	0.450518	3.36212	0.0611484	1.84662	0.549243	382.606	6.85971	377.642	10.6035	347.295	63.5389	382.606	6.85971	NA
OK_MRLW_1_Run1-Spot 3	953.265	80559.5	3.20666	16.547	1.36296	0.518725	2.76667	0.0622522	2.40766	0.870236	389.308	9.09578	424.299	9.59529	619.126	29.4183	389.308	9.09578	NA
OK_MrLW_1_Run2-Spot 151	877.603	77159.6	1.00092	18.2273	1.27569	0.475353	3.15378	0.06284	2.88426	0.91454	392.874	10.9931	394.88	10.318	406.619	28.5514	392.874	10.9931	NA
OK_MrLW_1_Run2-Spot 153	683.91	75792.3	1.94749	17.7339	1.73347	0.50519	2.31341	0.0649767	1.53197	0.662212	405.82	6.02539	415.21	7.88414	467.704	38.3971	405.82	6.02539	86.7687
OK_MrLW_1_Run2-Spot 184	396.43	51015.5	1.74741	17.8285	2.34375	0.503351	3.15808	0.0650855	2.11667	0.670239	406.479	8.33817	413.968	10.7369	455.908	52.0321	406.479	8.33817	89.1581
OK_MRLW_1_Run1-Spot 90	466.064	99120.9	1.69426	18.147	1.64833	0.502059	2.37935	0.0660782	1.71591	0.721166	412.485	6.85617	413.095	8.07543	416.487	36.8287	412.485	6.85617	99.039
OK_MRLW_1_Run1-Spot 89	997.788	58076.5	17.3063	18.2078	1.5802	0.501743	2.30251	0.0662577	1.67467	0.727324	413.57	6.70846	412.881	7.81135	409.012	35.3522	413.57	6.70846	101.115
OK_MrLW_1_Run2-Spot 143	238.593	57152.1	2.92858	17.9889	2.0671	0.508007	2.93232	0.0662786	2.0798	0.709269	413.697	8.3338	417.108	10.0305	435.998	46.0507	413.697	8.3338	94.8849
OK_MrLW_1_Run2-Spot 163	144.77	35714	1.05291	17.8164	2.92365	0.514778	3.59365	0.0665181	2.08964	0.581483	415.144	8.40161	421.657	12.4011	457.456	64.8682	415.144	8.40161	90.7506
OK_MrLW_1_Run2-Spot 191	352.848	109178	4.73811	18.0782	1.96073	0.510945	2.59575	0.0669927	1.70101	0.655306	418.012	6.88478	419.084	8.91309	424.967	43.7619	418.012	6.88478	98.3633
OK_MrLW_1_Run2-Spot 183	621.611	117970	1.08192	17.9796	1.28388	0.516368	1.94012	0.0673343	1.45455	0.749723	420.076	5.91539	422.722	6.7084	437.159	28.5932	420.076	5.91539	96.0922
OK_MrLW_1_Run2-Spot 192	339.772	27848.4	1.20752	17.897	2.05785	0.524717	2.65158	0.0681089	1.67216	0.630629	424.752	6.87362	428.297	9.26579	447.394	45.7349	424.752	6.87362	94.9391
OK_MrLW_1_Run2-Spot 185	846.281	61276.4	16.875	17.9885	1.97347	0.522256	2.61611	0.0681359	1.7174	0.65647	424.915	7.06218	426.657	9.11367	436.057	43.9435	424.915	7.06218	97.4448
OK_MRLW_1_Run1-Spot 91	583.569	138368	41.9393	17.7965	1.22204	0.53109	1.94831	0.068549	1.51741	0.778835	427.408	6.27523	432.533	6.86219	459.919	27.1189	427.408	6.27523	92.9312
OK_MrLW_1_Run2-Spot 161	411.637	170277	1.40438	17.6431	1.64391	0.536799	4.01169	0.0686886	3.6594	0.912184	428.25	15.1622	436.312	14.2292	479.062	36.3337	428.25	15.1622	89.3935
OK_MrLW_1_Run2-Spot 182	769.813	179530	1.55667	17.9457	1.42463	0.52895	2.11745	0.0688454	1.56653	0.739821	429.196	6.50456	431.113	7.43827	441.347	31.7088	429.196	6.50456	97.2467
OK_MrLW_1_Run2-Spot 137	785.614	187917	5.42899	18.1931	1.76208	0.523461	2.67309	0.0690702	2.01009	0.751973	430.551	8.37179	427.461	9.32628	410.813	39.4093	430.551	8.37179	104.805
OK_MRLW_1_Run1-Spot 99	294.616	235980	2.44556	18.1587	1.97298	0.52831	2.48121	0.069578	1.50459	0.606391	433.613	6.3095	430.688	8.70928	415.049	44.1052	433.613	6.3095	104.473
OK_MRLW_1_Run1-Spot 100	90.8687	35975.3	1.45903	17.5842	3.37031	0.556106	4.07552	0.0709216	2.29148	0.562255	441.706	9.78264	448.989	14.7898	486.488	74.4105	441.706	9.78264	90.7947
OK_MrLW_1_Run2-Spot 142	600.772	76795.1	2.22777	18.05	1.31806	0.547938	2.37249	0.0717311	1.97267	0.831476	446.577	8.51126	443.645	8.5275	428.446	29.401	446.577	8.51126	104.232
OK_MrLW_1_Run2-Spot 152	239.906	36814.3	1.12325	18.2986	2.27007	0.54282	2.78555	0.0720399	1.61433	0.579539	448.434	6.99316	440.282	9.95164	397.864	50.871	448.434	6.99316	112.71
OK_MRLW_1_Run1-Spot 12	69.713	10113.1	0.993394	19.0386	3.68503	0.522643	4.04913	0.0721669	1.67809	0.414433	449.198	7.28132	426.915	14.1132	308.309	83.9424	449.198	7.28132	145.697
OK_MRLW_1_Run1-Spot 79	457.459	122655	1.93424	17.759	1.82248	0.562599	2.19559	0.072463	1.22442	0.55767	450.977	5.33311	453.217	8.0268	464.593	40.3926	450.977	5.33311	97.0692
OK_MRLW_1_Run1-Spot 81	125.272	39199.1	0.988252	17.7586	2.9434	0.566646	3.71749	0.0729826	2.2707	0.610816	454.1	9.95646	455.843	13.6536	464.625	65.246	454.1	9.95646	97.7346
OK_MRLW_1_Run1-Spot 87	404.824	78656.2	10.5603	17.5791	2.00191	0.597089	2.49244	0.0761263	1.4848	0.595721	472.959	6.77107	475.385	9.46188	487.09	44.2064	472.959	6.77107	97.0989
OK_MRLW_1_Run1-Spot 85	234.61	100667	2.01545	17.6265	1.43544	0.598887	2.66326	0.0765613	2.24332	0.842319	475.565	10.2844	476.527	10.1294	481.142	31.735	475.565	10.2844	98.8407
OK_MrLW_1_Run2-Spot 202	195.728	45285.5	1.95591	16.9544	2.29783	0.644814	2.92807	0.0792894	1.81482	0.6198	491.88	8.59466	505.283	11.656	566.448	50.0387	491.88	8.59466	86.8358
OK_MrLW_1_Run2-Spot 168	77.3458	9889.46	2.4009	17.4927	3.07112	0.652649	4.07944	0.0828011	2.68515	0.658215	512.82	13.2365	510.107	16.3594	497.945	67.6884	512.82	13.2365	102.987
OK_MrLW_1_Run2-Spot 118	965.108	35138.8	0.588289	13.8465	2.41667	0.8366	3.81097	0.0840151	2.94672	0.773222	520.044	14.7225	617.268	17.6284	992.174	49.1252	520.044	14.7225	52.4146
OK_MRLW_1_Run1-Spot 20	158.425	62674.8	1.25252	17.0972	2.0434	0.705269	2.43388	0.087454	1.32223	0.54326	540.462	6.85478	541.933	10.2213	548.147	44.634	540.462	6.85478	98.598
OK_MrLW_1_Run2-Spot 122	296.851	74127.4	0.762867	17.2415	2.2982	0.702785	3.14902	0.0878814	2.15282	0.683646	542.996	11.2109	540.453	13.1975	529.761	50.3661	542.996	11.2109	102.498
OK_MRLW_1_Run1-Spot 8	164.956	35631.7	1.99456	16.9851	2.4182	0.716374	2.99496	0.0882483	1.76695	0.589972	545.169	9.23677	548.524	12.6932	562.461	52.6885	545.169	9.23677	96.9256
OK_MRLW_1_Run1-Spot 83	246.76	101173	1.05827	16.6697	2.15463	0.733295	2.7129	0.0886555	1.64845	0.607632	547.581	8.65383	558.485	11.6544	603.156	46.6118	547.581	8.65383	90.7859
OK_MRLW_1_Run1-Spot 73	151.674	22323.9	1.51605	17.1511	2.14391	0.721836	2.80266	0.0897901	1.80514	0.644082	554.295	9.5877	551.75	11.9307	541.258	46.8892	554.295	9.5877	102.409
OK_MRLW_1_Run1-Spot 70	280.313	145085	1.44587	16.8003	1.35643	0.742043	2.15669	0.0904161	1.67673	0.777454	557.997	8.96263	563.597	9.32826	586.285	29.4325	557.997	8.96263	95.1752
OK_MRLW_1_Run1-Spot 7	256.577	40724.4	0.902823	17.1325	2.06683	0.732242	2.66407	0.0909857	1.68091	0.630956	561.364	9.03685	557.868	11.4351	543.635	45.1929	561.364	9.03685	103.261
OK_MRLW_1_Run1-Spot 105	160.987	28235.3	1.28756	17.0692	1.96877	0.745039	3.50366	0.0922338	2.8982	0.827193	568.735	15.7769	565.342	15.19	551.735	42.9786	568.735	15.7769	103.081
OK_MRLW_1_Run1-Spot 37	629.458	109164	1.5482	16.6561	1.183	0.773862	1.93218	0.0934835	1.52769	0.790655	576.106	8.4193	581.976	8.55917	604.93	25.5973	576.106	8.4193	95.2352
OK_MrLW_1_Run2-Spot 216	329.028	162988	1.46754	16.6258	1.91612	0.777589	4.82441	0.0937628	4.42757	0.917744	577.753	24.4677	584.107	21.4317	608.867	41.4102	577.753	24.4677	94.8898
OK_MrLW_1_Run2-Spot 133	215.344	122400	2.46164	16.8153	2.00537	0.770634	2.64817	0.0939832	1.72954	0.653108	579.052	9.57831	580.126	11.7035	584.317	43.537	579.052	9.57831	99.0989
OK_MrLW_1_Run2-Spot 123	86.7881	13928.4	1.54037	16.6026	2.46643	0.816474	3.25131	0.0983144	2.11843	0.651563	604.523	12.2243	606.079	14.8399	611.881	53.2908	604.523	12.2243	98.7975
OK_MrLW_1_Run2-Spot 201	209.716	36075.7	1.70681	15.902	1.80178	0.862165	2.3935	0.0994352	1.57558	0.658274	611.098	9.18607	631.304	11.2526	704.367	38.3239	611.098	9.18607	86.7585
OK_MrLW_1_Run2-Spot 197	123.368	135333	1.34073	16.3806	2.59569	0.84584	4.00987	0.100488	3.05639	0.762215	617.27	17.9911	622.363	18.6597	640.944	55.8222	617.27	17.9911	96.3065
OK_MrLW_1_Run2-Spot 218	685.298	59941.7	1.84343	16.0317	1.29289	0.864289	2.50504	0.100494	2.14562	0.856519	617.3	12.6305	632.462	11.7926	687.056	27.5921	617.3	12.6305	89.8471
OK_MrLW_1_Run2-Spot 155	1010.56	116605	3.66217	16.4448	0.942405	0.844113	1.8504	0.100676	1.59244	0.860591	618.37	9.38963	621.413	8.60041	632.528	20.2939	618.37	9.38963	97.7618
OK_MrLW_1_Run2-Spot 150	298.087	153011	1.16121	16.5368	1.63456	0.845867	2.36929	0.10145	1.71515	0.723911	622.902	10.1838	622.378	11.0247	620.456	35.271	622.902	10.1838	100.394
OK_MRLW_1_Run1-Spot 54	88.9359	96764.3	2.2013	16.4915	2.27213	0.85895	3.1151	0.102737	2.13103	0.684096	630.427	12.7986	629.55	14.6161	626.378	48.9955	630.427	12.7986	100.646
OK_MRLW_1_Run1-Spot 82	491.362	176101	16.397	16.5142	1.31885	0.863883	1.96293	0.103469	1.45387	0.740663	634.706	8.78809	632.24	9.23812	623.411	28.4405	634.706	8.78809	101.812
OK_MrLW_1_Run2-Spot 167	137.82	46194.3	2.48497	16.1267	2.76609	0.928906	3.16777	0.108647	1.54388	0.487369	664.884	9.75336	667.059	15.491	674.396	59.1828	664.884	9.75336	98.5895
OK_MrLW_1_Run2-Spot 194	636.576	109301	1.55035	15.3285	1.24924	1.12782	2.14504	0.125383	1.74373	0.812914	761.471	12.5238	766.712	11.5448	781.995	26.2517	761.471	12.5238	97.3754
OK_MRLW_1_Run1-Spot 17	569.172	385267	5.58681	15.0524	1.14627	1.20778	3.31751	0.131854	3.11319	0.938411	798.433	23.3791	804.17	18.4299	820.111	23.9499	798.433	23.3791	97.3566
OK_MrLW_1_Run2-Spot 208	208.888	46184.7	3.41446	15.0945	1.81566	1.21088	2.59241	0.132563	1.85039	0.713774	802.468	13.9618	805.597	14.4178	814.276	37.9769	802.468	13.9618	98.5499
OK_MrLW_1_Run2-Spot 119	327.945	69264.6	2.66399	14.3582	1.09369	1.5426	1.84455	0.160639	1.48533	0.805253	960.326	13.2524	947.541	11.3635	917.973	22.5005	917.973	22.5005	104.614
OK_MRLW_1_Run1-Spot 76	480.821	88671.1	2.61069	14.1645	1.0114	1.58346	1.67952	0.162669	1.34084	0.798349	971.594	12.0933	963.73	10.4529	945.835	20.7044	945.835	20.7044	102.723
OK_MrLW_1_Run2-Spot 127	697.704	194103	5.94491	13.9368	1.19772	1.65765	2.13268	0.167553	1.7646	0.827407	998.616	16.3245	992.478	13.5075	978.915	24.4028	978.915	24.4028	102.013
OK_MrLW_1_Run2-Spot 144	193.995	63920.8	2.75091	13.8889	1.44647	1.69301	2.37423	0.17054	1.88274	0.792989	1015.08	17.6827	1005.9	15.1567	985.952	29.4402	985.952	29.4402	102.955
OK_MrLW_1_Run2-Spot 157	135.225	39916.7	2.94644	13.8714	2.11747	1.35665	4.04745	0.136486	3.44938	0.852234	824.76	26.7046	870.429	23.6626	988.495	43.0799	988.495	43.0799	83.436
OK_MrLW_1_Run2-Spot 139	122.869	66702.1	0.945036	13.8611	2.1143	1.62471	2.8621	0.163332	1.92907	0.674006	975.268	17.4596	979.816	17.991	990	43.0085	990	43.0085	98.5119
OK_MRLW_1_Run1-Spot 42	62.6123	22975.6	1.25153	13.777	2.70351	1.83599	3.30868	0.183452	1.90746	0.576501	1085.81	19.061	1058.42	21.7529	1002.36	54.9123	1002.36	54.9123	108.325
OK_MrLW_1_Run2-Spot 173	919.147	6.08707e+07	3.7378	13.7641	1.16131	1.66744	2.14247	0.166454	1.80042	0.840351	992.545	16.5623	996.211	13.5996	1004.27	23.5702	1004.27	23.5702	98.8323
OK_MRLW_1_Run1-Spot 97	327.423	101915	13.8514	13.7502	1.30861	1.70969	1.99935	0.170501	1.5116	0.756046	1014.87	14.1942	1012.17	12.8097	1006.31	26.5515	1006.31	26.5515	100.85
OK_MrLW_1_Run2-Spot 138	450.006	90930.2	2.108	13.703	1.18964	1.68444	2.56464	0.167405	2.27204	0.885909	997.8	21.0031	1002.66	16.3417	1013.29	24.1108	1013.29	24.1108	98.4711
OK_MRLW_1_Run1-Spot 74	30.5749	18361.7	0.42327	13.6917	2.4801	1.65953	3.00333	0.164794	1.69383	0.563984	983.362	15.4483	993.198	19.0311	1014.97	50.2596	1014.97	50.2596	96.8862
OK_MRLW_1_Run1-Spot 56	793.768	130804	8.39673	13.6832	1.02985	1.75032	2.07055	0.173702	1.79626	0.867532	1032.47	17.137	1027.28	13.3806	1016.22	20.8468	1016.22	20.8468	101.599
OK_MrLW_1_Run2-Spot 172	122.562	38226.4	1.6461	13.659	2.00512	1.73857	2.64579	0.17223	1.72618	0.652424	1024.39	16.3494	1022.93	17.0567	1019.81	40.6207	1019.81	40.6207	100.449
OK_MRLW_1_Run1-Spot 18	46.2444	42334.8	1.49129	13.6557	2.20706	1.75923	2.95782	0.174234	1.96916	0.665746	1035.4	18.8356	1030.57	19.1509	1020.3	44.6887	1020.3	44.6887	101.48
OK_MrLW_1_Run2-Spot 209	51.275	41229.3	1.77468	13.6264	2.20013	1.66276	2.77622	0.164328	1.69317	0.609883	980.783	15.4048	994.429	17.6045	1024.63	44.5374	1024.63	44.5374	95.7206
OK_MRLW_1_Run1-Spot 53	149.38	35353	1.55431	13.615	1.2907	1.74126	2.27761	0.171941	1.87659	0.823929	1022.8	17.7485	1023.93	14.691	1026.33	26.1272	1026.33	26.1272	99.6556
OK_MrLW_1_Run2-Spot 136	54.5771	28593.8	1.78477	13.6093	2.48515	1.68351	3.5532	0.166169	2.53953	0.714717	990.97	23.3272	1002.31	22.6378	1027.18	50.2836	1027.18	50.2836	96.4748
OK_MRLW_1_Run1-Spot 98	49.9962	32135.3	0.49936	13.6003	2.55355	1.68807	3.20977	0.166509	1.94474	0.605882	992.848	17.895	1004.03	20.4697	1028.52	51.6591	1028.52	51.6591	96.5321
OK_MRLW_1_Run1-Spot 22	72.9063	43500.6	0.740546	13.5959	2.17093	1.75801	3.44251	0.173352	2.67169	0.776088	1030.55	25.4453	1030.12	22.2844	1029.18	43.9099	1029.18	43.9099	100.134
OK_MRLW_1_Run1-Spot 75	408.916	69401.3	4.35544	13.5781	1.07257	1.7762	1.82407	0.174917	1.47541	0.808856	1039.14	14.1598	1036.79	11.8504	1031.81	21.697	1031.81	21.697	100.711
OK_MrLW_1_Run2-Spot 180	137.211	35966.2	2.87707	13.5773	1.75704	1.75498	2.5884	0.172817	1.90069	0.734311	1027.61	18.0546	1029	16.7438	1031.94	35.5152	1031.94	35.5152	99.5812
OK_MrLW_1_Run2-Spot 214	754.112	61280.2	2.00958	13.5753	0.75334	1.83363	1.63117	0.180534	1.44679	0.886963	1069.89	14.2628	1057.58	10.718	1032.24	15.243	1032.24	15.243	103.648
OK_MRLW_1_Run1-Spot 63	150.761	30732.7	3.63031	13.5631	1.70956	1.74909	2.65374	0.172056	2.02972	0.764852	1023.43	19.2078	1026.83	17.1457	1034.05	34.5609	1034.05	34.5609	98.9727
OK_MrLW_1_Run2-Spot 205	185.475	81627.3	2.83359	13.5539	1.30253	1.7304	2.67816	0.170102	2.34008	0.873763	1012.68	21.9299	1019.9	17.2357	1035.42	26.3306	1035.42	26.3306	97.8032
OK_MrLW_1_Run2-Spot 131	644.167	222175	1.22347	13.5529	1.23494	1.8241	2.12233	0.1793	1.72603	0.813274	1063.15	16.917	1054.16	13.92	1035.57	24.964	1035.57	24.964	102.663
OK_MrLW_1_Run2-Spot 116	327.471	96215.8	4.25209	13.5469	1.81784	1.71284	2.48745	0.168289	1.69789	0.682585	1002.68	15.7665	1013.35	15.9482	1036.46	36.7352	1036.46	36.7352	96.7401
OK_MRLW_1_Run1-Spot 19	75.2441	38836.4	1.04796	13.537	2.15309	1.8556	2.59724	0.182181	1.45254	0.559261	1078.88	14.43	1065.42	17.1384	1037.95	43.4937	1037.95	43.4937	103.943
OK_MrLW_1_Run2-Spot 187	606.28	117355	2.83118	13.5194	1.48204	1.82234	2.21926	0.178684	1.65187	0.744334	1059.78	16.143	1053.53	14.5509	1040.57	29.9339	1040.57	29.9339	101.846
OK_MRLW_1_Run1-Spot 15	180.072	35268.7	3.75301	13.4482	1.23831	1.84965	1.86376	0.180407	1.3929	0.747362	1069.2	13.7234	1063.31	12.284	1051.25	24.9736	1051.25	24.9736	101.707
OK_MrLW_1_Run2-Spot 211	774.329	141993	27.4679	13.4234	1.13652	1.84971	2.97441	0.18008	2.74872	0.924121	1067.41	27.0398	1063.33	19.606	1054.98	22.8994	1054.98	22.8994	101.178
OK_MRLW_1_Run1-Spot 45	141.662	43532.7	4.02662	13.4163	1.61804	1.7355	2.48036	0.168872	1.87994	0.757927	1005.89	17.5086	1021.8	15.9797	1056.04	32.5945	1056.04	32.5945	95.2509
OK_MRLW_1_Run1-Spot 106	251.361	67663.1	2.58429	13.4059	1.36455	1.86873	2.23825	0.181694	1.7742	0.792671	1076.22	17.5856	1070.08	14.8056	1057.61	27.4814	1057.61	27.4814	101.76
OK_MrLW_1_Run2-Spot 178	270.139	93585.9	1.62683	13.3905	1.37649	1.812	2.58227	0.175976	2.18482	0.846083	1044.95	21.0761	1049.8	16.8972	1059.92	27.7215	1059.92	27.7215	98.5883
OK_MRLW_1_Run1-Spot 65	448.131	69162.9	2.14887	13.3666	1.09911	1.85703	1.92818	0.180027	1.58425	0.821629	1067.12	15.5807	1065.93	12.7264	1063.51	22.1194	1063.51	22.1194	100.339
OK_MRLW_1_Run1-Spot 67	303.55	179478	3.86511	13.366	1.1763	1.80304	2.35204	0.174786	2.03677	0.865958	1038.42	19.5348	1046.56	15.3633	1063.6	23.661	1063.6	23.661	97.6333
OK_MRLW_1_Run1-Spot 16	148.966	145120	1.25154	13.3521	1.96981	1.87245	2.74104	0.181325	1.90609	0.695386	1074.21	18.8603	1071.4	18.1447	1065.7	39.6311	1065.7	39.6311	100.799
OK_MRLW_1_Run1-Spot 46	309.967	91071.7	1.91634	13.3295	1.1811	1.84333	1.87485	0.178203	1.45604	0.776617	1057.15	14.1967	1061.05	12.3422	1069.1	23.7188	1069.1	23.7188	98.8824
OK_MrLW_1_Run2-Spot 200	201.73	113198	2.44355	13.3229	1.19	1.85272	1.92032	0.179023	1.50717	0.784851	1061.64	14.7526	1064.4	12.6642	1070.09	23.9124	1070.09	23.9124	99.2099
OK_MrLW_1_Run2-Spot 199	937.389	240065	37.4634	13.3108	1.27807	1.89151	2.06003	0.182604	1.61563	0.784274	1081.18	16.0817	1078.11	13.684	1071.93	25.6649	1071.93	25.6649	100.864
OK_MrLW_1_Run2-Spot 212	262.116	106737	2.18321	13.3089	1.16418	1.86407	1.67055	0.17993	1.19809	0.717182	1066.59	11.7776	1068.43	11.0404	1072.2	23.3869	1072.2	23.3869	99.4771
OK_MrLW_1_Run2-Spot 190	168.227	99665.3	1.43789	13.305	1.48742	1.74179	2.33607	0.168077	1.80134	0.771097	1001.51	16.709	1024.13	15.0699	1072.8	29.8921	1072.8	29.8921	93.355
OK_MRLW_1_Run1-Spot 50	466.269	56628.9	2.59576	13.3042	1.41848	1.8578	2.41794	0.179262	1.95815	0.809841	1062.94	19.1885	1066.2	15.9617	1072.91	28.4933	1072.91	28.4933	99.0708
OK_MrLW_1_Run2-Spot 156	82.7519	35210.9	2.26219	13.2793	1.85859	1.77981	3.03121	0.171414	2.39455	0.789966	1019.9	22.5881	1038.11	19.7088	1076.68	37.314	1076.68	37.314	94.7259
OK_MrLW_1_Run2-Spot 164	196.536	55932.5	2.53046	13.2646	1.85835	1.80959	2.3333	0.17409	1.41097	0.60471	1034.6	13.4868	1048.93	15.2606	1078.89	37.3158	1078.89	37.3158	95.8952
OK_MrLW_1_Run2-Spot 207	228.008	33593.1	0.43304	13.254	1.27406	1.89965	1.98987	0.182608	1.52852	0.768148	1081.21	15.2148	1080.97	13.2375	1080.5	25.554	1080.5	25.554	100.065
OK_MrLW_1_Run2-Spot 171	493.945	246941	1.33601	13.2498	1.05075	1.9528	1.73907	0.187657	1.38575	0.796834	1108.67	14.1149	1099.41	11.6786	1081.11	21.0797	1081.11	21.0797	102.549
OK_MrLW_1_Run2-Spot 169	97.4624	27461.8	1.0147	13.2451	2.0654	1.81137	2.42618	0.174005	1.27298	0.524686	1034.14	12.1628	1049.57	15.8737	1081.86	41.4421	1081.86	41.4421	95.5893
OK_MrLW_1_Run2-Spot 154	481.892	213027	2.07656	13.2179	1.27495	1.99529	2.09167	0.191278	1.65818	0.792756	1128.3	17.1634	1113.92	14.1487	1085.98	25.5413	1085.98	25.5413	103.897
OK_MrLW_1_Run2-Spot 158	211.138	74803.2	1.43551	13.168	1.52482	2.02849	4.19962	0.193728	3.91302	0.931756	1141.54	40.9378	1125.11	28.5694	1093.55	30.5156	1093.55	30.5156	104.389
OK_MrLW_1_Run2-Spot 177	303.684	83959.8	1.72152	13.1232	1.50565	1.89149	1.88856	0.180028	1.14002	0.603649	1067.13	11.2119	1078.1	12.5448	1100.34	30.1079	1100.34	30.1079	96.9814
OK_MrLW_1_Run2-Spot 170	285.248	56237	5.42452	13.0825	1.39904	1.94648	2.13955	0.184688	1.61875	0.756586	1092.53	16.268	1097.23	14.3525	1106.55	27.9493	1106.55	27.9493	98.7335
OK_MRLW_1_Run1-Spot 47	146.951	67745.1	3.8282	13.0438	1.52574	2.02488	2.48576	0.191559	1.96243	0.789468	1129.81	20.3376	1123.9	16.8974	1112.47	30.4679	1112.47	30.4679	101.559
OK_MRLW_1_Run1-Spot 30	181.926	174085	2.31933	13.0232	1.43322	1.80623	2.71927	0.170605	2.31091	0.849828	1015.44	21.7112	1047.72	17.7736	1115.62	28.5927	1115.62	28.5927	91.0205
OK_MRLW_1_Run1-Spot 24	274.816	100705	3.62271	13.0162	1.30586	1.9784	2.81513	0.186765	2.49393	0.885902	1103.83	25.3009	1108.18	18.9894	1116.74	26.0787	1116.74	26.0787	98.844
OK_MrLW_1_Run2-Spot 206	494.437	115658	3.09889	13.0107	1.3605	2.04786	1.96973	0.19324	1.42438	0.723137	1138.9	14.8702	1131.58	13.439	1117.58	27.1478	1117.58	27.1478	101.908
OK_MrLW_1_Run2-Spot 210	315.301	42395.8	1.92968	12.9575	1.12221	1.99516	3.31179	0.187498	3.11586	0.940839	1107.8	31.7149	1113.87	22.4038	1125.74	22.3751	1125.74	22.3751	98.4065
OK_MrLW_1_Run2-Spot 124	219.315	60092.8	3.06714	12.9563	1.83	1.60953	2.61837	0.151244	1.87268	0.715209	907.934	15.8597	973.927	16.3997	1125.91	36.4649	1125.91	36.4649	80.6398
OK_MrLW_1_Run2-Spot 159	875.069	202204	3.33951	12.927	1.4215	1.99357	2.42578	0.186908	1.96564	0.810313	1104.6	19.9542	1113.33	16.4044	1130.4	28.2914	1130.4	28.2914	97.7179
OK_MRLW_1_Run1-Spot 4	1203.18	743446	3.93045	12.8957	1.27928	2.09694	1.87421	0.196124	1.36971	0.730821	1154.46	14.4778	1147.8	12.8862	1135.23	25.4608	1135.23	25.4608	101.694
OK_MRLW_1_Run1-Spot 44	543.047	3.49828e+06	3.69781	12.8529	1.55852	1.96288	2.71343	0.182975	2.2212	0.818595	1083.21	22.1475	1102.87	18.2547	1141.88	31.0057	1141.88	31.0057	94.8613
OK_MRLW_1_Run1-Spot 107	94.2792	153904	1.86349	12.8024	1.26077	2.07857	2.61475	0.192999	2.29072	0.876075	1137.6	23.8895	1141.76	17.9275	1149.66	25.0573	1149.66	25.0573	98.9512
OK_MrLW_1_Run2-Spot 149	697.416	323722	1.8282	12.7937	1.16182	2.0459	2.10842	0.189837	1.75944	0.83448	1120.49	18.0962	1130.93	14.3809	1151.04	23.0685	1151.04	23.0685	97.3466
OK_MrLW_1_Run2-Spot 128	975.189	54582.5	2.69725	12.7869	1.07983	2.14697	2.42941	0.199108	2.17624	0.895787	1170.53	23.2947	1164.07	16.8308	1152.07	21.4559	1152.07	21.4559	101.603
OK_MRLW_1_Run1-Spot 9	242.197	48163.7	2.1592	12.7777	1.60143	2.11975	2.3226	0.196443	1.68223	0.724287	1156.18	17.8053	1155.26	16.0253	1153.5	31.7945	1153.5	31.7945	100.232
OK_MrLW_1_Run2-Spot 129	1585.23	142385	2.99599	12.7462	1.27594	2.10388	2.27511	0.194491	1.88364	0.827935	1145.66	19.7713	1150.08	15.6597	1158.4	25.3176	1158.4	25.3176	98.8999
OK_MRLW_1_Run1-Spot 41	321.249	95856.6	1.50602	12.7186	0.784867	1.95862	1.74462	0.18067	1.5581	0.893089	1070.64	15.3699	1101.41	11.7276	1162.7	15.5761	1162.7	15.5761	92.0819
OK_MRLW_1_Run1-Spot 21	171.79	60454.8	3.60921	12.6881	1.44261	2.0774	2.11399	0.191168	1.54526	0.730968	1127.7	15.9868	1141.38	14.491	1167.45	28.5563	1167.45	28.5563	96.5947
OK_MrLW_1_Run2-Spot 217	117.449	63427.6	4.86389	12.6632	2.10752	2.10515	3.16048	0.193341	2.3552	0.745204	1139.45	24.5985	1150.49	21.7596	1171.38	41.7404	1171.38	41.7404	97.2742
OK_MRLW_1_Run1-Spot 48	326.033	128198	1.5834	12.6606	1.43553	2.17417	2.87372	0.199639	2.48948	0.866293	1173.38	26.707	1172.81	19.9891	1171.78	28.4206	1171.78	28.4206	100.137
OK_MrLW_1_Run2-Spot 186	997.529	2.04402e+06	2.32884	12.6294	1.30219	2.03494	2.81397	0.186395	2.49454	0.886485	1101.82	25.2648	1127.27	19.1603	1176.66	25.7479	1176.66	25.7479	93.639
OK_MRLW_1_Run1-Spot 60	271.545	2.56219e+06	2.08123	12.6202	1.33131	2.08154	2.27152	0.190524	1.84049	0.810246	1124.21	18.9873	1142.74	15.5811	1178.11	26.3303	1178.11	26.3303	95.4252
OK_MrLW_1_Run2-Spot 196	397.727	243738	3.07709	12.6081	1.26094	2.20709	1.82694	0.201823	1.32203	0.723629	1185.1	14.3116	1183.29	12.7669	1180	24.9306	1180	24.9306	100.433
OK_MRLW_1_Run1-Spot 103	369.878	68086.6	4.2459	12.6071	1.0437	2.16845	3.07899	0.198273	2.8967	0.940795	1166.04	30.8983	1170.98	21.3996	1180.16	20.6448	1180.16	20.6448	98.8038
OK_MRLW_1_Run1-Spot 34	170.579	76976.3	2.49317	12.6062	1.41314	2.16759	2.83143	0.19818	2.45358	0.86655	1165.54	26.1613	1170.71	19.6761	1180.29	27.9568	1180.29	27.9568	98.7499
OK_MrLW_1_Run2-Spot 125	99.112	28280.2	2.75373	12.5572	1.99183	2.20686	4.59582	0.200986	4.14175	0.901201	1180.62	44.6825	1183.22	32.1242	1188	39.321	1188	39.321	99.3787
OK_MrLW_1_Run2-Spot 193	153.742	46486.3	2.17519	12.5366	1.84097	2.13315	2.50856	0.193954	1.70403	0.679284	1142.76	17.8446	1159.61	17.3435	1191.2	36.3417	1191.2	36.3417	95.9334
OK_MrLW_1_Run2-Spot 121	294.35	175829	1.61887	12.485	1.20585	2.29708	2.1312	0.207999	1.75725	0.824537	1218.15	19.5051	1211.39	15.0776	1199.37	23.757	1199.37	23.757	101.566
OK_MRLW_1_Run1-Spot 36	319.509	174648	2.12459	12.4718	1.7252	2.14737	2.26711	0.194239	1.47087	0.648787	1144.3	15.4219	1164.2	15.7071	1201.42	34.0248	1201.42	34.0248	95.2455
OK_MrLW_1_Run2-Spot 166	50.919	11774.4	3.6287	12.4654	2.77588	2.02169	3.855	0.182776	2.67499	0.6939	1082.12	26.6477	1122.83	26.1948	1202.47	54.7269	1202.47	54.7269	89.9918
OK_MrLW_1_Run2-Spot 215	141.517	45302.2	3.55638	12.333	2.17095	2.15909	2.83255	0.193125	1.81943	0.64233	1138.28	18.9849	1167.98	19.6594	1223.45	42.6381	1223.45	42.6381	93.0387
OK_MrLW_1_Run2-Spot 132	75.6982	40901.3	3.70121	12.3308	1.73046	2.31609	2.65614	0.207131	2.01509	0.758653	1213.51	22.2897	1217.23	18.8391	1223.8	33.9991	1223.8	33.9991	99.1595
OK_MrLW_1_Run2-Spot 140	543.751	160137	5.02118	12.3026	1.00313	2.26989	2.04036	0.202534	1.77674	0.870796	1188.92	19.2905	1202.98	14.3826	1228.3	19.6917	1228.3	19.6917	96.7942
OK_MrLW_1_Run2-Spot 176	301.209	54850.8	1.5052	12.2484	1.26312	2.45551	2.2739	0.218133	1.89081	0.831527	1272	21.827	1259.04	16.4085	1236.99	24.7521	1236.99	24.7521	102.831
OK_MrLW_1_Run2-Spot 111	360.926	109829	2.36804	12.1606	1.26935	2.32621	2.11638	0.205165	1.69347	0.800171	1203.01	18.5846	1220.32	15.0298	1251.08	24.8405	1251.08	24.8405	96.1578
OK_MrLW_1_Run2-Spot 213	90.6196	26209.8	6.52034	12.1577	1.70099	2.39466	2.3167	0.211151	1.57281	0.678901	1234.95	17.6763	1241	16.5953	1251.54	33.2825	1251.54	33.2825	98.6744
OK_MRLW_1_Run1-Spot 66	179.817	220774	1.47885	12.0777	1.23782	2.42669	2.57416	0.212567	2.25701	0.876795	1242.48	25.5062	1250.54	18.512	1264.46	24.1698	1264.46	24.1698	98.262
OK_MrLW_1_Run2-Spot 195	123.673	60894.5	2.82353	11.9478	1.82215	2.33731	2.73762	0.202535	2.04312	0.746312	1188.93	22.1828	1223.7	19.4705	1285.52	35.4761	1285.52	35.4761	92.4863
OK_MRLW_1_Run1-Spot 84	602.472	384557	9.01581	11.8867	1.24979	2.61902	2.26211	0.225787	1.88551	0.83352	1312.38	22.3889	1305.99	16.6238	1295.48	24.2866	1295.48	24.2866	101.304
OK_MrLW_1_Run2-Spot 189	870.15	58461.8	1.86696	11.8698	1.33285	2.34071	2.59961	0.201507	2.23192	0.85856	1183.41	24.1303	1224.74	18.4967	1298.26	25.9008	1298.26	25.9008	91.1537
OK_MRLW_1_Run1-Spot 5	1062.58	188652	2.33461	11.7044	0.760631	2.69168	1.77807	0.228492	1.60717	0.903881	1326.59	19.2699	1326.17	13.1645	1325.48	14.7281	1325.48	14.7281	100.084
OK_MRLW_1_Run1-Spot 78	365.962	1.57702e+06	2.33952	11.6494	1.19845	2.67871	2.69757	0.226323	2.41674	0.895894	1315.2	28.7525	1322.6	19.9475	1334.59	23.1774	1334.59	23.1774	98.5471
OK_MRLW_1_Run1-Spot 2	279.587	63759.1	2.15969	11.6311	1.23376	2.67884	2.25162	0.225979	1.88351	0.836514	1313.39	22.3807	1322.64	16.6494	1337.63	23.8506	1337.63	23.8506	98.1878
OK_MrLW_1_Run2-Spot 198	576.02	143935	2.70592	11.6255	1.47188	2.65421	2.3905	0.223791	1.88363	0.787966	1301.88	22.2051	1315.81	17.6321	1338.57	28.4524	1338.57	28.4524	97.2588
OK_MRLW_1_Run1-Spot 69	118.985	45015.9	2.30605	11.5528	1.9614	2.70287	2.44031	0.226471	1.45191	0.594969	1315.98	17.2829	1329.25	18.0887	1350.67	37.8509	1350.67	37.8509	97.4314
OK_MrLW_1_Run2-Spot 220	391.412	51264.2	3.60254	11.5164	1.21655	2.86213	2.77593	0.239059	2.49516	0.898854	1381.8	31.0336	1372.01	20.8912	1356.77	23.4558	1356.77	23.4558	101.845
OK_MRLW_1_Run1-Spot 62	1015.4	34725.2	4.02734	11.4932	4.29098	2.30298	4.58399	0.191969	1.6126	0.351789	1132.03	16.7421	1213.21	32.4643	1360.65	82.7219	1360.65	82.7219	83.1981
OK_MRLW_1_Run1-Spot 92	362.091	115346	2.43529	11.4509	1.59135	2.85877	2.65886	0.23742	2.13006	0.801116	1373.27	26.3458	1371.12	20.0038	1367.76	30.6362	1367.76	30.6362	100.403
OK_MRLW_1_Run1-Spot 23	663.624	61530.4	3.186	11.3474	1.04296	2.82628	3.7286	0.2326	3.57976	0.960082	1348.11	43.5478	1362.54	27.972	1385.22	20.03	1385.22	20.03	97.3213
OK_MRLW_1_Run1-Spot 32	265.095	83300.4	1.98523	11.3175	1.1535	2.99571	2.18586	0.245895	1.85672	0.849423	1417.27	23.623	1406.53	16.6417	1390.27	22.1362	1390.27	22.1362	101.942
OK_MrLW_1_Run2-Spot 188	308.126	49569.1	2.65569	11.2987	1.57419	2.77709	3.08366	0.227572	2.65158	0.85988	1321.76	31.6882	1349.4	23.0252	1393.46	30.1985	1393.46	30.1985	94.8546
OK_MrLW_1_Run2-Spot 181	205.007	101667	3.03688	11.2034	1.19267	3.02936	2.56615	0.24615	2.27215	0.885431	1418.59	28.9327	1415.04	19.5921	1409.69	22.8275	1409.69	22.8275	100.631
OK_MRLW_1_Run1-Spot 109	100.599	146735	2.80192	11.1063	1.16177	3.05883	2.03222	0.246391	1.6674	0.820481	1419.84	21.2486	1422.45	15.5521	1426.33	22.1858	1426.33	22.1858	99.5448
OK_MRLW_1_Run1-Spot 31	640.77	90544.1	3.63496	11.0138	1.22055	3.12528	2.49372	0.249646	2.1746	0.872031	1436.65	28.0051	1438.93	19.1851	1442.29	23.2581	1442.29	23.2581	99.6088
OK_MRLW_1_Run1-Spot 28	64.5191	41235.6	1.33404	10.9719	1.54575	3.14794	2.34187	0.2505	1.75927	0.751222	1441.05	22.7183	1444.5	18.0482	1449.55	29.4268	1449.55	29.4268	99.4135
OK_MRLW_1_Run1-Spot 1	269.326	131057	2.43591	10.9287	1.22767	2.7399	1.93473	0.21717	1.49533	0.772889	1266.91	17.1991	1339.35	14.3931	1457.07	23.3472	1457.07	23.3472	86.9492
OK_MRLW_1_Run1-Spot 49	68.4895	22545.4	0.457296	10.9229	2.24703	3.21359	3.32547	0.254583	2.45145	0.737173	1462.07	32.0682	1460.44	25.7581	1458.06	42.731	1458.06	42.731	100.275
OK_MRLW_1_Run1-Spot 57	96.3889	48883.6	2.59966	10.917	2.08881	3.11269	3.86164	0.246454	3.24794	0.841079	1420.16	41.3992	1435.83	29.6849	1459.1	39.7159	1459.1	39.7159	97.3314
OK_MRLW_1_Run1-Spot 39	270.837	62486.2	1.57722	10.8679	1.17171	3.15438	2.09897	0.248631	1.74148	0.829685	1431.41	22.3542	1446.07	16.1838	1467.67	22.2512	1467.67	22.2512	97.5298
OK_MRLW_1_Run1-Spot 59	840.664	123127	2.54992	10.7246	0.830902	3.37865	1.75024	0.262799	1.54043	0.880128	1504.15	20.6658	1499.46	13.7138	1492.82	15.7258	1492.82	15.7258	100.759
OK_MrLW_1_Run2-Spot 175	276.806	83048.7	0.772942	10.682	1.18083	3.31737	1.94266	0.257006	1.54258	0.794056	1474.51	20.3317	1485.15	15.1577	1500.36	22.325	1500.36	22.325	98.277
OK_MRLW_1_Run1-Spot 40	221.521	116546	2.20244	10.6681	1.09821	3.41432	1.94647	0.264174	1.60707	0.825635	1511.16	21.6491	1507.69	15.288	1502.81	20.7559	1502.81	20.7559	100.556
OK_MRLW_1_Run1-Spot 72	112.761	38621.9	0.716454	10.6467	1.53444	3.38023	2.71697	0.261012	2.2422	0.825256	1495.02	29.9183	1499.82	21.2926	1506.6	28.9874	1506.6	28.9874	99.2308
OK_MrLW_1_Run2-Spot 162	84.7335	103416	2.07964	10.4897	1.66896	3.48598	2.34669	0.265209	1.64971	0.702993	1516.44	22.2922	1524.05	18.5183	1534.61	31.4123	1534.61	31.4123	98.8155
OK_MRLW_1_Run1-Spot 110	334.285	98325	2.52376	10.2623	1.14968	3.09855	3.40191	0.230623	3.20176	0.941164	1337.77	38.6803	1432.33	26.1203	1575.75	21.5207	1575.75	21.5207	84.8971
OK_MRLW_1_Run1-Spot 43	383.167	99696.1	9.89922	10.2419	1.19341	3.81005	2.04811	0.283014	1.66449	0.812696	1606.53	23.6689	1594.87	16.4741	1579.48	22.3285	1579.48	22.3285	101.712
OK_MRLW_1_Run1-Spot 93	195.281	158136	1.22945	10.1848	1.09053	3.95274	1.75619	0.291976	1.37657	0.783838	1651.4	20.0544	1624.55	14.2326	1589.94	20.3757	1589.94	20.3757	103.865
OK_MrLW_1_Run2-Spot 148	74.1957	30575.4	1.01424	10.117	1.48532	3.93181	2.1736	0.288499	1.58694	0.730097	1634.02	22.9055	1620.25	17.597	1602.39	27.7082	1602.39	27.7082	101.974
OK_MRLW_1_Run1-Spot 95	342.606	57594.3	1.57328	10.0384	1.21233	3.96183	2.36738	0.288444	2.0334	0.858926	1633.75	29.3454	1626.41	19.1957	1616.93	22.5725	1616.93	22.5725	101.04
OK_MrLW_1_Run2-Spot 135	133.461	171161	1.48817	10.0048	0.968451	4.03676	2.14466	0.292915	1.91355	0.892239	1656.08	27.9468	1641.63	17.4547	1623.17	18.0165	1623.17	18.0165	102.028
OK_MRLW_1_Run1-Spot 27	1052.35	124838	8.95836	9.89901	0.954137	3.52655	1.70716	0.253187	1.41564	0.829234	1454.89	18.4373	1533.19	13.5056	1642.92	17.7068	1642.92	17.7068	88.5548
OK_MRLW_1_Run1-Spot 29	355.659	58728.3	2.14074	9.87433	1.01657	4.01639	1.65385	0.287635	1.30453	0.788783	1629.7	18.7855	1637.52	13.4461	1647.55	18.8526	1647.55	18.8526	98.9164
OK_MRLW_1_Run1-Spot 25	206.969	127589	1.20606	9.87041	0.979454	4.01613	1.90256	0.287503	1.63108	0.857305	1629.04	23.4794	1637.47	15.4682	1648.29	18.1624	1648.29	18.1624	98.8318
OK_MrLW_1_Run2-Spot 160	225.726	758388	1.90615	9.78553	1.4325	4.12447	2.28356	0.29272	1.77836	0.778768	1655.11	25.959	1659.16	18.6642	1664.29	26.5108	1664.29	26.5108	99.4483
OK_MRLW_1_Run1-Spot 51	403.24	135370	2.19757	9.74665	0.794723	4.1635	1.74431	0.294315	1.55275	0.89018	1663.06	22.7611	1666.87	14.2822	1671.65	14.6926	1671.65	14.6926	99.4858
OK_MRLW_1_Run1-Spot 77	164.567	57129.9	2.22428	9.71094	1.26386	4.09015	1.98539	0.288071	1.53116	0.771211	1631.88	22.0749	1652.34	16.2002	1678.44	23.3471	1678.44	23.3471	97.2262
OK_MrLW_1_Run2-Spot 130	211.039	75720.8	1.48755	9.68385	1.58598	4.16187	2.35	0.292304	1.73411	0.737921	1653.03	25.2853	1666.55	19.2412	1683.6	29.2779	1683.6	29.2779	98.1848
OK_MRLW_1_Run1-Spot 64	355.575	111924	2.39023	9.58352	1.28646	4.28728	2.00454	0.297992	1.53726	0.766892	1681.35	22.751	1690.92	16.5056	1702.8	23.6915	1702.8	23.6915	98.7401
OK_MrLW_1_Run2-Spot 117	219.253	89918.4	1.11941	9.398	1.23594	4.36282	1.8031	0.297373	1.31287	0.728118	1678.27	19.3989	1705.33	14.8955	1738.71	22.6584	1738.71	22.6584	96.5236
OK_MRLW_1_Run1-Spot 101	627.957	491684	4.75414	9.36582	0.96905	4.49791	1.61543	0.305531	1.2925	0.800097	1718.68	19.4993	1730.59	13.4201	1745	17.751	1745	17.751	98.4918
OK_MrLW_1_Run2-Spot 141	743.286	208080	4.27902	9.29849	1.15927	3.91062	1.91458	0.263728	1.52372	0.795849	1508.89	20.4987	1615.88	15.4827	1758.2	21.2011	1758.2	21.2011	85.8198
OK_MrLW_1_Run2-Spot 203	190.597	391140	2.13238	9.20761	1.18256	4.80109	1.70825	0.320616	1.23275	0.721643	1792.74	19.2931	1785.09	14.3562	1776.15	21.5791	1776.15	21.5791	100.934
OK_MrLW_1_Run2-Spot 114	89.1845	91282.7	1.67717	9.1709	1.5453	4.73828	2.31198	0.31516	1.71968	0.743812	1766.05	26.5657	1774.04	19.3868	1783.43	28.1741	1783.43	28.1741	99.0254
OK_MRLW_1_Run1-Spot 61	155.414	56553	1.30473	9.15037	1.06764	4.74704	2.30323	0.315036	2.04084	0.886076	1765.44	31.5176	1775.58	19.3196	1787.52	19.4544	1787.52	19.4544	98.765
OK_MRLW_1_Run1-Spot 38	258.586	101084	3.76611	8.85912	1.1942	4.96935	2.09113	0.319293	1.71659	0.820894	1786.27	26.7816	1814.12	17.6777	1846.25	21.6052	1846.25	21.6052	96.7518
OK_MrLW_1_Run2-Spot 145	493.996	133250	3.70885	8.78103	0.944498	5.29572	2.17705	0.337263	1.9615	0.900989	1873.49	31.8906	1868.17	18.5963	1862.24	17.054	1862.24	17.054	100.604
OK_MRLW_1_Run1-Spot 102	235.929	62712	0.587538	8.55187	0.81915	5.58928	1.40793	0.346669	1.1451	0.813323	1918.67	19.0028	1914.45	12.1269	1909.86	14.7081	1909.86	14.7081	100.462
OK_MrLW_1_Run2-Spot 174	318.583	450547	16.4165	8.45441	1.03079	5.81536	2.41976	0.356581	2.18923	0.90473	1965.95	37.096	1948.7	20.9678	1930.41	18.4612	1930.41	18.4612	101.841
OK_MRLW_1_Run1-Spot 58	267.857	107198	1.98849	8.40796	1.24321	5.791	2.09337	0.353137	1.68422	0.804552	1949.56	28.3349	1945.07	18.1276	1940.27	22.2405	1940.27	22.2405	100.479
OK_MrLW_1_Run2-Spot 165	90.2909	137258	4.49588	8.31488	1.54709	5.49607	2.3729	0.331442	1.79921	0.758233	1845.37	28.8728	1899.98	20.3878	1960.16	27.6132	1960.16	27.6132	94.1436
OK_MRLW_1_Run1-Spot 13	150.406	106584	1.57401	7.67421	0.921366	6.92556	2.60577	0.385467	2.43744	0.935402	2101.77	43.7169	2101.94	23.1241	2102.08	16.1774	2102.08	16.1774	99.9851
OK_MrLW_1_Run2-Spot 126	117.559	33038.9	1.85154	7.67126	0.895797	7.21406	1.81435	0.40137	1.57779	0.869616	2175.35	29.1314	2138.24	16.1812	2102.76	15.7271	2102.76	15.7271	103.452
OK_MrLW_1_Run2-Spot 146	407.324	1.15124e+06	3.51212	7.60062	1.06305	7.08146	2.22111	0.390365	1.9502	0.878027	2124.52	35.2974	2121.72	19.7646	2118.98	18.6302	2118.98	18.6302	100.261
OK_MRLW_1_Run1-Spot 104	451.208	1.51891e+07	20.7041	6.50127	0.809284	8.62607	2.14198	0.406733	1.98322	0.925879	2199.97	36.965	2299.31	19.4923	2388.77	13.7765	2388.77	13.7765	92.0961
OK_MrLW_1_Run2-Spot 147	144.939	176365	1.65255	5.45089	1.14182	13.1214	2.01552	0.518737	1.66089	0.82405	2693.82	36.5702	2688.42	19.0182	2684.36	18.8803	2684.36	18.8803	100.353
OK_MRLW_1_Run1-Spot 26	250.428	129267	1.45256	5.41639	0.931826	13.2326	2.19063	0.519819	1.98256	0.90502	2698.41	43.7132	2696.38	20.6833	2694.84	15.3921	2694.84	15.3921	100.132
OK_MRLW_1_Run1-Spot 6	372.602	217135	2.12031	5.35912	0.891523	13.495	1.53374	0.524523	1.24802	0.813709	2718.34	27.6805	2714.93	14.5	2712.39	14.7053	2712.39	14.7053	100.219
OK_MRLW_1_Run1-Spot 33	132.076	91063.2	1.32309	5.098	1.26196	14.0362	1.98509	0.518977	1.53233	0.771921	2694.84	33.7499	2752.16	18.8179	2794.46	20.656	2794.46	20.656	96.4353
25b--Duncan Sandstone, Oklahoma. ( 35°10'1.51"N 97°33'52.89"W)
OK_MRLW_2_Run1-Spot 96	696.486	40796.4	6.50192	13.896	3.46857	0.406591	4.51028	0.0409777	2.88299	0.639205	258.89	7.3159	346.418	13.2388	984.875	70.6231	258.89	7.3159	NA	disconrdant
OK_MRLW_2_Run2-Spot 163	132.171	25164.5	0.969872	18.7276	2.43249	0.344864	3.10532	0.0468411	1.93029	0.621607	295.099	5.56784	300.85	8.08564	345.735	55.0335	295.099	5.56784	NA
OK_MRLW_2_Run2-Spot 168	89.9487	21556.2	0.645336	18.8216	3.36535	0.346546	4.03904	0.047306	2.23343	0.552961	297.961	6.50329	302.12	10.5551	334.393	76.2834	297.961	6.50329	NA
OK_MRLW_2_Run1-Spot 65	53.0739	74537.3	0.968256	18.2297	3.78538	0.377223	4.23356	0.0498741	1.89576	0.447793	313.749	5.8055	324.992	11.7747	406.322	84.7482	313.749	5.8055	NA
OK_MRLW_2_Run2-Spot 126	605.737	38238.7	64.4523	18.7358	1.52309	0.380168	4.19678	0.051659	3.91064	0.93182	324.699	12.3834	327.161	11.7384	344.74	34.4493	324.699	12.3834	NA
OK_MRLW_2_Run1-Spot 17	312.682	226368	2.23124	15.3304	9.49384	0.491417	10.2897	0.0546389	3.96791	0.385621	342.939	13.2519	405.875	34.4389	781.74	199.943	342.939	13.2519	NA
OK_MRLW_2_Run1-Spot 51	480.717	88974.2	2.5533	18.1942	1.91073	0.438214	2.85932	0.0578253	2.12716	0.74394	362.387	7.49589	368.992	8.84638	410.676	42.7562	362.387	7.49589	NA
OK_MRLW_2_Run2-Spot 217	176.377	387893	1.38522	18.1321	2.21208	0.455564	2.54952	0.0599096	1.26759	0.497187	375.075	4.61875	381.168	8.10245	418.322	49.4158	375.075	4.61875	NA
OK_MRLW_2_Run2-Spot 181	477.177	89714.5	1.28165	18.3942	1.51396	0.453433	2.7879	0.0604911	2.341	0.839703	378.612	8.60807	379.681	8.83152	386.182	33.9914	378.612	8.60807	NA
OK_MRLW_2_Run2-Spot 115	397.907	82948.5	12.7174	18.1636	1.46889	0.473858	2.56121	0.0624235	2.09813	0.819194	390.347	7.94695	393.85	8.36136	414.447	32.8307	390.347	7.94695	NA
OK_MRLW_2_Run1-Spot 91	322.181	48879.3	1.59631	16.7127	3.05203	0.519633	3.66242	0.0629858	2.02445	0.552763	393.758	7.73287	424.906	12.7168	597.581	66.119	393.758	7.73287	NA
OK_MRLW_2_Run2-Spot 148	257.516	38654.5	0.609496	18.0701	1.40834	0.483662	2.26047	0.0633871	1.76814	0.782198	396.191	6.79427	400.582	7.48244	425.971	31.4353	396.191	6.79427	NA
OK_MRLW_2_Run1-Spot 89	150.297	63048.8	1.49056	18.0109	2.19235	0.488573	2.90021	0.0638211	1.89863	0.654653	398.822	7.34268	403.937	9.66566	433.278	48.8639	398.822	7.34268	NA
OK_MRLW_2_Run2-Spot 114	274.402	51122.4	0.638507	18.4241	1.93392	0.480648	3.13715	0.0642262	2.47015	0.787388	401.276	9.60993	398.517	10.3408	382.526	43.4463	401.276	9.60993	104.902
OK_MRLW_2_Run1-Spot 88	142.375	24406.2	1.43381	18.0488	2.40048	0.497149	3.41888	0.065078	2.43442	0.712053	406.434	9.58886	409.771	11.528	428.593	53.5448	406.434	9.58886	94.8297
OK_MRLW_2_Run2-Spot 201	266.851	36925.6	3.35896	18.0882	1.78479	0.496436	2.66332	0.0651262	1.97681	0.742235	406.726	7.7918	409.287	8.97158	423.738	39.8488	406.726	7.7918	95.9853
OK_MRLW_2_Run2-Spot 164	832.721	108980	2.6829	17.8137	1.61114	0.506285	2.31976	0.0654107	1.66898	0.719465	408.447	6.60545	415.948	7.91715	457.748	35.7494	408.447	6.60545	89.2298
OK_MRLW_2_Run2-Spot 182	143.165	87305.3	3.09014	17.4836	1.81843	0.517077	2.44524	0.0655668	1.63478	0.668557	409.392	6.48458	423.197	8.46271	499.098	40.0453	409.392	6.48458	82.0262
OK_MRLW_2_Run2-Spot 128	253.448	43208.4	2.51666	18.237	2.05415	0.498003	2.56756	0.0658694	1.54041	0.599949	411.222	6.13669	410.35	8.66725	405.424	45.9863	411.222	6.13669	101.43
OK_MRLW_2_Run1-Spot 107	186.038	63361.7	0.676558	18.1074	1.87407	0.503614	2.67738	0.0661384	1.91213	0.714178	412.848	7.64671	414.146	9.1057	421.361	41.8586	412.848	7.64671	97.9797
OK_MRLW_2_Run1-Spot 47	366.967	75023.4	2.17421	17.9926	1.33807	0.508167	2.52335	0.0663131	2.13935	0.847824	413.905	8.57661	417.216	8.63325	435.543	29.8085	413.905	8.57661	95.0319
OK_MRLW_2_Run1-Spot 11	246.391	37892.6	2.00552	18.1607	1.78416	0.503936	2.29163	0.0663753	1.43817	0.627574	414.281	5.77064	414.363	7.79702	414.797	39.8897	414.281	5.77064	99.8757
OK_MRLW_2_Run2-Spot 166	411.631	85347.2	3.84876	17.9396	1.03663	0.510224	1.85604	0.0663854	1.53957	0.829493	414.342	6.1784	418.6	6.3671	442.106	23.0783	414.342	6.1784	93.7202
OK_MRLW_2_Run1-Spot 12	208.031	34903.8	4.04191	17.9974	1.42175	0.510327	2.05478	0.0666128	1.48349	0.721969	415.716	5.97245	418.669	7.04984	434.947	31.6635	415.716	5.97245	95.5785
OK_MRLW_2_Run1-Spot 84	296.626	59419.6	2.59234	18.1008	1.75126	0.512361	2.05369	0.0672625	1.07271	0.522334	419.642	4.35815	420.036	7.06467	422.175	39.0896	419.642	4.35815	99.4
OK_MRLW_2_Run1-Spot 42	114.584	84101.4	1.48796	17.9419	2.56637	0.518983	3.21368	0.0675337	1.93429	0.601892	421.28	7.8882	424.471	11.1493	441.821	57.093	421.28	7.8882	95.3508
OK_MRLW_2_Run1-Spot 35	344.726	82574.2	1.99811	18.114	2.29509	0.517241	2.81256	0.0679527	1.62575	0.578031	423.81	6.66846	423.306	9.73605	420.546	51.2475	423.81	6.66846	100.776
OK_MRLW_2_Run2-Spot 124	242.302	43104.6	1.44047	17.4568	1.80634	0.537478	2.35449	0.0680493	1.51021	0.641417	424.393	6.2028	436.76	8.35772	502.487	39.7561	424.393	6.2028	84.4584
OK_MRLW_2_Run2-Spot 120	155.641	91491.7	2.39123	18.0818	2.28152	0.522463	2.90022	0.0685167	1.79052	0.617373	427.213	7.40137	426.795	10.1061	424.518	50.9265	427.213	7.40137	100.635
OK_MRLW_2_Run1-Spot 100	119.524	32683.6	2.00299	18.0799	2.59517	0.527786	3.14288	0.0692072	1.7728	0.564068	431.378	7.39721	430.339	11.0248	424.761	57.9267	431.378	7.39721	101.558
OK_MRLW_2_Run1-Spot 108	169.258	54304.3	1.39479	17.9989	2.28945	0.532139	3.00421	0.0694657	1.94518	0.647484	432.936	8.14482	433.228	10.5951	434.762	51.0051	432.936	8.14482	99.58
OK_MRLW_2_Run1-Spot 14	405.964	36713.6	1.31727	17.8516	1.30074	0.537492	1.79615	0.0695904	1.23865	0.689613	433.687	5.19516	436.77	6.37586	453.031	28.8981	433.687	5.19516	95.7302
OK_MRLW_2_Run2-Spot 118	48.7921	17034.3	0.958101	18.4178	3.2043	0.522032	3.85777	0.0697322	2.14822	0.556856	434.542	9.02727	426.508	13.4358	383.299	72.0413	434.542	9.02727	113.369
OK_MRLW_2_Run1-Spot 95	319.779	87857.4	1.00422	17.6097	1.71685	0.550699	2.19742	0.070334	1.37152	0.624149	438.168	5.80985	445.454	7.92387	483.282	37.9185	438.168	5.80985	90.665
OK_MRLW_2_Run2-Spot 174	193.471	86781.5	1.69743	17.7427	2.46884	0.555004	2.71259	0.0714191	1.12382	0.414298	444.7	4.82913	448.269	9.83086	466.607	54.687	444.7	4.82913	95.3051
OK_MRLW_2_Run2-Spot 203	320.721	62517.9	0.881249	17.6947	1.15106	0.560487	2.14825	0.0719294	1.81385	0.844338	447.769	7.84622	451.843	7.83482	472.629	25.468	447.769	7.84622	94.7402
OK_MRLW_2_Run1-Spot 25	333.557	39323.5	1.52963	17.8792	1.59161	0.559353	4.26375	0.0725325	3.95555	0.927716	451.395	17.2444	451.105	15.5309	449.604	35.357	451.395	17.2444	100.398
OK_MRLW_2_Run1-Spot 34	175.74	43648.8	1.14354	18.0244	2.04029	0.555953	3.20578	0.0726773	2.4727	0.771326	452.266	10.7999	448.889	11.6312	431.604	45.4671	452.266	10.7999	104.787
OK_MRLW_2_Run2-Spot 194	193.548	79961.3	1.6383	17.7644	2.17032	0.570841	2.72434	0.0735467	1.64672	0.604449	457.488	7.27246	458.558	10.0528	463.925	48.1022	457.488	7.27246	98.6125
OK_MRLW_2_Run2-Spot 135	100.352	28073.2	4.11332	17.2292	1.96296	0.592923	2.56248	0.0740904	1.64715	0.642795	460.752	7.32441	472.733	9.68516	531.331	42.99	460.752	7.32441	86.7166
OK_MRLW_2_Run1-Spot 39	246.398	187743	1.42331	17.19	1.84729	0.604095	2.6041	0.0753147	1.83544	0.704826	468.096	8.28709	479.829	9.95809	536.318	40.4308	468.096	8.28709	87.2795
OK_MRLW_2_Run1-Spot 9	246.138	169116	3.08984	17.5222	1.7468	0.594672	2.88864	0.0755727	2.30063	0.796442	469.642	10.4206	473.847	10.9382	494.255	38.5151	469.642	10.4206	95.0202
OK_MRLW_2_Run2-Spot 130	100.098	24825.2	1.28197	17.7147	2.21512	0.604829	3.03792	0.077708	2.079	0.684348	482.427	9.66355	480.294	11.626	470.099	49.0363	482.427	9.66355	102.623
OK_MRLW_2_Run1-Spot 78	146.568	39933.1	1.23472	16.9312	1.62108	0.706056	2.44515	0.0867015	1.83054	0.74864	535.999	9.41485	542.402	10.2753	569.42	35.2757	535.999	9.41485	94.1308
OK_MRLW_2_Run2-Spot 178	79.9537	50090.1	0.824563	16.6356	3.08696	0.728856	4.48152	0.0879384	3.2488	0.724933	543.333	16.9284	555.882	19.1863	607.593	66.7634	543.333	16.9284	89.4238
OK_MRLW_2_Run1-Spot 13	626.963	326080	9.11844	17.076	1.38485	0.713629	5.24661	0.0883808	5.06054	0.964536	545.954	26.4908	546.899	22.1888	550.82	30.2467	545.954	26.4908	99.1165
OK_MRLW_2_Run1-Spot 101	111.116	43784.4	1.22444	16.5247	2.57244	0.738902	3.30705	0.0885564	2.07826	0.628431	546.994	10.899	561.765	14.2696	622.031	55.4791	546.994	10.899	87.9368
OK_MRLW_2_Run1-Spot 62	115.852	64333.8	1.2726	17.1012	1.96693	0.716422	2.54031	0.0888575	1.60759	0.632835	548.777	8.45704	548.553	10.7666	547.602	42.9613	548.777	8.45704	100.215
OK_MRLW_2_Run1-Spot 50	165.081	41174.7	1.47995	16.2638	1.97496	0.767298	3.15853	0.0905075	2.46492	0.780402	558.538	13.188	578.212	13.925	656.297	42.3724	558.538	13.188	85.1045
OK_MRLW_2_Run2-Spot 134	185.296	25994.2	1.1211	16.9572	1.6428	0.739486	2.00153	0.090946	1.14339	0.571256	561.129	6.14459	562.105	8.63997	566.08	35.7534	561.129	6.14459	99.1254
OK_MRLW_2_Run1-Spot 5	740.245	82072.8	0.886332	17.1582	1.30426	0.732513	2.02445	0.0911561	1.54832	0.764811	562.371	8.33831	558.027	8.69132	540.368	28.5403	562.371	8.33831	104.072
OK_MRLW_2_Run1-Spot 109	124.342	62099.9	0.802795	16.3611	1.75155	0.811418	2.4074	0.0962844	1.65156	0.686034	592.597	9.35071	603.249	10.9502	643.501	37.6516	592.597	9.35071	92.0896
OK_MRLW_2_Run1-Spot 32	298.177	100134	1.04567	16.5685	1.39547	0.806603	2.21329	0.0969262	1.71794	0.776193	596.37	9.78567	600.546	10.0341	616.325	30.1316	596.37	9.78567	96.7623
OK_MRLW_2_Run2-Spot 122	377.889	168044	6.06067	16.6401	1.36686	0.829371	4.19675	0.100093	3.96793	0.945475	614.952	23.2732	613.263	19.3216	607.009	29.5664	614.952	23.2732	101.309
OK_MRLW_2_Run1-Spot 56	259.572	97977.7	1.70493	16.0945	1.01258	0.861861	3.1719	0.100603	3.00593	0.947676	617.944	17.7125	631.138	14.9097	678.674	21.6266	617.944	17.7125	91.0516
OK_MRLW_2_Run2-Spot 147	171.673	153164	2.17862	16.352	1.93501	0.849186	2.82225	0.10071	2.05447	0.727955	618.569	12.1177	624.202	13.1605	644.694	41.6079	618.569	12.1177	95.9477
OK_MRLW_2_Run2-Spot 198	230.907	50292.6	2.09936	16.0906	1.80644	0.869175	3.45723	0.101433	2.94775	0.852633	622.801	17.4997	635.119	16.325	679.183	38.5828	622.801	17.4997	91.6987
OK_MRLW_2_Run2-Spot 138	97.6712	98245.1	1.67463	16.1993	2.18896	0.869866	2.85105	0.102199	1.82673	0.640723	627.283	10.919	635.495	13.468	664.827	46.8982	627.283	10.919	94.3529
OK_MRLW_2_Run1-Spot 21	202.199	51768.9	1.43641	16.5456	1.66839	0.852853	3.95892	0.102342	3.5902	0.906863	628.12	21.487	626.214	18.5049	619.313	36.0286	628.12	21.487	101.422
OK_MRLW_2_Run2-Spot 218	103.77	54401.4	2.15971	15.933	2.39855	0.890562	2.92353	0.102911	1.67153	0.57175	631.443	10.0543	646.671	13.9842	700.186	51.0763	631.443	10.0543	90.1823
OK_MRLW_2_Run2-Spot 183	373.519	234965	1.63482	16.3681	1.60803	0.878267	2.95676	0.104261	2.48126	0.839182	639.333	15.1023	640.046	14.0392	642.585	34.5749	639.333	15.1023	99.494
OK_MRLW_2_Run1-Spot 55	631.991	65811.5	3.93817	16.1073	1.20688	0.899439	2.78526	0.105073	2.5102	0.901245	644.073	15.3861	651.428	13.3927	677.002	25.8187	644.073	15.3861	95.1361
OK_MRLW_2_Run1-Spot 41	429.415	138293	3.38699	14.3559	1.09867	1.27414	2.30083	0.132662	2.02156	0.878625	803.036	15.2635	834.242	13.09	918.296	22.6085	803.036	15.2635	87.4485
OK_MRLW_2_Run1-Spot 94	118.577	812186	0.871703	14.0537	1.61217	1.3149	2.04853	0.134024	1.26388	0.616969	810.781	9.62907	852.277	11.8155	961.901	32.9233	810.781	9.62907	84.2894
OK_MRLW_2_Run2-Spot 188	310.312	102190	4.28317	14.4612	1.32495	1.28162	2.09644	0.13442	1.62468	0.774968	813.029	12.4101	837.575	11.9577	903.217	27.3065	813.029	12.4101	90.0148
OK_MRLW_2_Run2-Spot 150	130.929	54424.6	5.3514	14.3091	2.07751	1.3638	2.87027	0.141534	1.98051	0.690007	853.331	15.8295	873.503	16.8164	925.008	42.6805	853.331	15.8295	92.2513
OK_MRLW_2_Run1-Spot 2	166.362	80899	2.94256	14.3536	1.54722	1.49429	2.53039	0.155559	2.00225	0.79128	932.047	17.3756	928.065	15.3936	918.636	31.8397	918.636	31.8397	101.46
OK_MRLW_2_Run2-Spot 112	578.602	95640.5	10.9981	14.167	1.41541	1.60983	2.34635	0.165409	1.87136	0.797561	986.764	17.1221	974.044	14.6968	945.477	28.9692	945.477	28.9692	104.367
OK_MRLW_2_Run2-Spot 177	100.475	27832.5	1.43572	14.0271	2.06323	1.60259	2.91761	0.163038	2.0629	0.70705	973.636	18.642	971.22	18.244	965.775	42.1062	965.775	42.1062	100.814
OK_MRLW_2_Run2-Spot 216	246.004	51805.6	8.18648	13.9788	1.55237	1.61374	3.50143	0.163607	3.1385	0.896347	976.79	28.4471	975.563	21.9541	972.819	31.6394	972.819	31.6394	100.408
OK_MRLW_2_Run1-Spot 43	347.629	63570.6	2.46057	13.978	1.528	1.48439	2.16384	0.150484	1.53213	0.70806	903.678	12.9188	924.026	13.1282	972.934	31.1426	972.934	31.1426	92.8818
OK_MRLW_2_Run1-Spot 1	418.56	148564	2.95472	13.8171	0.893562	1.695	1.98607	0.169858	1.7737	0.893071	1011.33	16.6017	1006.65	12.684	996.493	18.1455	996.493	18.1455	101.489
OK_MRLW_2_Run2-Spot 171	631.627	122677	2.3443	13.7912	1.04713	1.63956	1.85698	0.163994	1.53359	0.82585	978.933	13.9285	985.543	11.7126	1000.28	21.2655	1000.28	21.2655	97.8663
OK_MRLW_2_Run1-Spot 70	283.417	70424.8	3.82542	13.737	1.43036	1.74718	2.06563	0.174072	1.49027	0.721459	1034.51	14.2435	1026.12	13.3401	1008.26	29.0126	1008.26	29.0126	102.603
OK_MRLW_2_Run2-Spot 213	157.202	59094.9	4.36286	13.7163	1.85608	1.74825	3.96269	0.173916	3.50113	0.883523	1033.65	33.4375	1026.52	25.6012	1011.32	37.6446	1011.32	37.6446	102.209
OK_MRLW_2_Run2-Spot 123	330.522	101468	3.50981	13.7072	0.917852	1.74765	1.96366	0.173741	1.73594	0.884036	1032.69	16.5647	1026.3	12.6827	1012.67	18.5852	1012.67	18.5852	101.977
OK_MRLW_2_Run1-Spot 72	60.3416	36699.8	1.18296	13.696	2.12169	1.69965	2.73964	0.168831	1.73322	0.632645	1005.67	16.1389	1008.4	17.5154	1014.33	43.0177	1014.33	43.0177	99.146
OK_MRLW_2_Run2-Spot 133	372.821	152293	2.23961	13.6296	1.20531	1.78518	1.98879	0.176468	1.58193	0.795425	1047.65	15.2965	1040.07	12.9441	1024.16	24.4079	1024.16	24.4079	102.294
OK_MRLW_2_Run1-Spot 61	135.423	31527.1	3.62363	13.621	1.74879	1.60092	5.33113	0.158152	5.03613	0.944666	946.501	44.3335	970.568	33.3309	1025.44	35.3802	1025.44	35.3802	92.3016
OK_MRLW_2_Run1-Spot 76	367.589	83587.8	2.44821	13.6098	1.09726	1.71182	1.95306	0.16897	1.61569	0.82726	1006.43	15.0551	1012.97	12.5189	1027.11	22.2115	1027.11	22.2115	97.9873
OK_MRLW_2_Run1-Spot 3	276.948	116203	2.85903	13.6064	1.26313	1.8008	2.04387	0.177708	1.60683	0.786171	1054.44	15.63	1045.75	13.3442	1027.61	25.5647	1027.61	25.5647	102.611
OK_MRLW_2_Run1-Spot 58	302.371	122304	4.0709	13.5952	1.51151	1.7701	2.10454	0.174534	1.46438	0.695822	1037.05	14.0278	1034.56	13.6557	1029.28	30.5808	1029.28	30.5808	100.755
OK_MRLW_2_Run2-Spot 116	64.3457	48939.9	3.11514	13.595	1.32909	1.76178	2.28893	0.173712	1.86352	0.814145	1032.53	17.7796	1031.5	14.8271	1029.3	26.8913	1029.3	26.8913	100.314
OK_MRLW_2_Run2-Spot 160	69.4921	78287	0.677405	13.5916	1.94888	1.60873	2.65065	0.158581	1.79661	0.677801	948.888	15.8526	973.613	16.5987	1029.81	39.4021	1029.81	39.4021	92.1421
OK_MRLW_2_Run1-Spot 7	49.3543	30733.3	1.78175	13.5793	2.13299	1.7357	3.11207	0.170944	2.26613	0.728175	1017.31	21.3266	1021.87	20.0513	1031.63	43.1248	1031.63	43.1248	98.6114
OK_MRLW_2_Run2-Spot 202	196.686	233692	2.57944	13.5408	1.28236	1.82187	1.84585	0.178921	1.32767	0.719275	1061.08	12.9893	1053.36	12.1012	1037.38	25.9159	1037.38	25.9159	102.284
OK_MRLW_2_Run2-Spot 212	39.8384	122494	1.78604	13.5066	2.12951	1.71449	3.13627	0.16795	2.30247	0.734143	1000.81	21.3437	1013.96	20.1162	1042.48	42.9739	1042.48	42.9739	96.0027
OK_MRLW_2_Run2-Spot 156	239.311	5.56725e+06	2.82039	13.5007	1.21005	1.74785	2.07998	0.171143	1.69177	0.813359	1018.41	15.9371	1026.37	13.4346	1043.37	24.4335	1043.37	24.4335	97.6075
OK_MRLW_2_Run2-Spot 208	736.517	409509	3.56599	13.4951	0.936061	1.80202	1.63395	0.176373	1.33924	0.819637	1047.13	12.9439	1046.19	10.6702	1044.21	18.9029	1044.21	18.9029	100.28
OK_MRLW_2_Run2-Spot 193	131.274	45454.3	1.70869	13.4951	1.30016	1.84387	2.15484	0.180469	1.7184	0.797462	1069.54	16.9353	1061.24	14.1871	1044.21	26.2483	1044.21	26.2483	102.426
OK_MRLW_2_Run2-Spot 140	152.838	153817	1.40588	13.4934	1.32245	1.78424	2.41526	0.174612	2.02105	0.836781	1037.47	19.3676	1039.73	15.7172	1044.45	26.6959	1044.45	26.6959	99.3325
OK_MRLW_2_Run1-Spot 37	55.0758	32924.7	1.32499	13.4776	2.02523	1.80652	4.67692	0.176585	4.21569	0.901381	1048.29	40.7872	1047.82	30.5771	1046.85	40.8613	1046.85	40.8613	100.138
OK_MRLW_2_Run1-Spot 57	366.477	77441	1.45064	13.4771	1.34298	1.7416	2.91561	0.170233	2.58789	0.887598	1013.4	24.2683	1024.06	18.8085	1046.92	27.0998	1046.92	27.0998	96.7976
OK_MRLW_2_Run1-Spot 54	721.285	208783	2.53599	13.4613	1.06615	1.79033	1.93553	0.174792	1.61542	0.834616	1038.46	15.4941	1041.95	12.6104	1049.29	21.5101	1049.29	21.5101	98.9677
OK_MRLW_2_Run1-Spot 52	42.2868	111184	1.62406	13.446	2.28033	1.77992	2.91927	0.173577	1.82269	0.624366	1031.79	17.3785	1038.15	18.9811	1051.59	45.9561	1051.59	45.9561	98.1172
OK_MRLW_2_Run2-Spot 207	384.545	53895.7	2.13141	13.4454	1.18602	1.78824	2.02875	0.174381	1.64596	0.811318	1036.21	15.7554	1041.19	13.2123	1051.67	23.9172	1051.67	23.9172	98.5293
OK_MRLW_2_Run1-Spot 10	189.509	51889.2	2.20744	13.4413	1.75274	1.764	2.46863	0.171965	1.73841	0.704198	1022.93	16.4436	1032.32	15.9986	1052.29	35.3363	1052.29	35.3363	97.21
OK_MRLW_2_Run1-Spot 66	39.5794	26666.5	2.44944	13.4406	3.06896	1.67878	3.55472	0.163648	1.79375	0.504609	977.018	16.2618	1000.52	22.6237	1052.4	61.8277	1052.4	61.8277	92.8376
OK_MRLW_2_Run1-Spot 30	171.298	65224.8	2.22705	13.4386	1.24143	1.82472	2.15267	0.177847	1.75865	0.816961	1055.2	17.1181	1054.38	14.1207	1052.7	25.0148	1052.7	25.0148	100.238
OK_MRLW_2_Run1-Spot 106	240.183	138753	3.44353	13.4377	1.38261	1.75639	2.57994	0.171176	2.17818	0.844276	1018.59	20.5227	1029.52	16.6939	1052.84	27.8696	1052.84	27.8696	96.7471
OK_MRLW_2_Run1-Spot 69	58.0504	46784.2	2.03046	13.4293	2.26428	1.70773	3.1299	0.16633	2.16085	0.690391	991.856	19.8652	1011.43	20.0461	1054.1	45.6311	1054.1	45.6311	94.0955
OK_MRLW_2_Run2-Spot 219	248.973	210516	1.56101	13.42	1.02837	1.84229	1.53579	0.179312	1.14066	0.742717	1063.22	11.1803	1060.68	10.108	1055.48	20.7296	1055.48	20.7296	100.733
OK_MRLW_2_Run2-Spot 145	118.286	56133.6	1.87385	13.414	1.40408	1.78681	2.34543	0.173834	1.87873	0.801015	1033.2	17.9354	1040.66	15.2706	1056.38	28.2922	1056.38	28.2922	97.806
OK_MRLW_2_Run2-Spot 157	229.267	183756	1.90797	13.4101	1.34652	1.78637	2.7087	0.173742	2.35031	0.867687	1032.69	22.4272	1040.5	17.6347	1056.96	27.131	1056.96	27.131	97.7038
OK_MRLW_2_Run1-Spot 75	260.644	111417	6.80042	13.4018	1.02832	1.82339	2.02249	0.177232	1.74156	0.861097	1051.83	16.9019	1053.91	13.2632	1058.22	20.7124	1058.22	20.7124	99.3965
OK_MRLW_2_Run1-Spot 60	402.559	111458	3.40556	13.3996	1.26438	1.80735	2.01197	0.175644	1.56505	0.77787	1043.13	15.0732	1048.12	13.1529	1058.55	25.4515	1058.55	25.4515	98.5439
OK_MRLW_2_Run2-Spot 127	145.66	74133.4	2.00484	13.3956	1.49701	1.92438	2.08631	0.186962	1.45315	0.696517	1104.9	14.7552	1089.59	13.941	1059.15	30.1318	1059.15	30.1318	104.32
OK_MRLW_2_Run2-Spot 143	112.866	36241.3	1.71629	13.3721	1.90981	1.83228	2.36773	0.177702	1.39956	0.591096	1054.41	13.6134	1057.1	15.5544	1062.68	38.4232	1062.68	38.4232	99.2216
OK_MRLW_2_Run1-Spot 20	280.188	75302.7	2.21948	13.3635	1.41494	1.82233	1.92748	0.176623	1.30886	0.679052	1048.5	12.6655	1053.52	12.6375	1063.98	28.4606	1063.98	28.4606	98.5453
OK_MRLW_2_Run2-Spot 151	42.6073	59359.3	1.71048	13.3178	2.45432	1.80921	3.10805	0.174751	1.9069	0.613537	1038.23	18.2861	1048.79	20.3273	1070.86	49.3383	1070.86	49.3383	96.9533
OK_MRLW_2_Run1-Spot 33	110.145	227470	1.43311	13.3129	2.01442	1.68708	2.90876	0.162895	2.09833	0.721383	972.845	18.9479	1003.66	18.5456	1071.6	40.4742	1071.6	40.4742	90.7847
OK_MRLW_2_Run1-Spot 93	79.0657	46191.3	0.767442	13.2803	2.179	1.82901	3.40466	0.176166	2.61605	0.768372	1046	25.2592	1055.92	22.354	1076.53	43.7665	1076.53	43.7665	97.1641
OK_MRLW_2_Run2-Spot 195	55.1888	35297.9	1.01968	13.2669	2.18176	1.6903	2.89928	0.162641	1.90938	0.658572	971.439	17.2186	1004.88	18.4983	1078.52	43.7913	1078.52	43.7913	90.0715
OK_MRLW_2_Run1-Spot 36	270.991	85662.3	3.13901	13.2563	1.27804	1.81852	3.09518	0.174839	2.819	0.91077	1038.72	27.0442	1052.15	20.2801	1080.12	25.6328	1080.12	25.6328	96.1668
OK_MRLW_2_Run2-Spot 170	81.5925	97298.8	1.71111	13.2373	1.88553	1.7962	2.65298	0.172446	1.8663	0.703472	1025.58	17.6954	1044.08	17.3058	1083	37.8182	1083	37.8182	94.698
OK_MRLW_2_Run2-Spot 175	88.8547	32258.8	1.9009	13.22	1.85982	1.76309	2.47818	0.169046	1.63782	0.660895	1006.85	15.2671	1031.98	16.0575	1085.65	37.2893	1085.65	37.2893	92.7419
OK_MRLW_2_Run1-Spot 46	382.906	63799.7	2.29436	13.145	1.08797	1.91732	3.1085	0.18279	2.91189	0.93675	1082.2	29.0096	1087.13	20.7468	1097.03	21.7746	1097.03	21.7746	98.6478
OK_MRLW_2_Run1-Spot 31	189.83	50334.5	0.584903	13.1333	1.41516	1.84738	2.89875	0.175966	2.52984	0.872735	1044.9	24.4032	1062.5	19.0987	1098.8	28.2971	1098.8	28.2971	95.0943
OK_MRLW_2_Run2-Spot 162	81.7783	80299.1	2.16292	13.1199	2.24847	1.79435	2.51201	0.17074	1.12007	0.445887	1016.19	10.5303	1043.41	16.38	1100.84	44.9803	1100.84	44.9803	92.3101
OK_MRLW_2_Run2-Spot 141	72.3306	52651.3	1.27333	13.1052	1.7788	1.8344	2.15372	0.174355	1.21424	0.563787	1036.06	11.6214	1057.86	14.154	1103.12	35.5704	1103.12	35.5704	93.9208
OK_MRLW_2_Run2-Spot 185	63.373	65121.5	2.07605	13.0921	1.72453	1.80047	5.44117	0.170959	5.16065	0.948445	1017.39	48.5714	1045.63	35.5348	1105.08	34.467	1105.08	34.467	92.0648
OK_MRLW_2_Run2-Spot 176	87.2761	36503.5	4.4556	13.0673	2.5409	1.73966	3.50004	0.164872	2.40708	0.687732	983.798	21.9625	1023.34	22.5705	1108.87	50.7529	1108.87	50.7529	88.7209
OK_MRLW_2_Run2-Spot 196	56.4234	153378	1.02644	13.0577	1.59433	1.86052	2.43434	0.176198	1.8396	0.755688	1046.17	17.765	1067.17	16.0782	1110.34	31.8422	1110.34	31.8422	94.2209
OK_MRLW_2_Run1-Spot 80	67.4315	97133.2	0.915986	13.0514	1.90528	1.85564	2.75381	0.175651	1.9883	0.72202	1043.17	19.1502	1065.44	18.1719	1111.3	38.0428	1111.3	38.0428	93.8696
OK_MRLW_2_Run2-Spot 113	183.793	70577.9	2.26489	13.0212	1.44587	1.95281	2.33171	0.184422	1.8293	0.78453	1091.09	18.3615	1099.41	15.659	1115.96	28.8703	1115.96	28.8703	97.7711
OK_MRLW_2_Run2-Spot 117	205.563	81692.5	2.33349	12.9857	1.59861	2.03408	2.79243	0.191571	2.28956	0.819918	1129.88	23.7292	1126.98	19.0109	1121.41	31.876	1121.41	31.876	100.755
OK_MRLW_2_Run1-Spot 6	229.918	91283	1.4455	12.9809	1.45776	2.09489	2.33485	0.197227	1.82386	0.781145	1160.4	19.3687	1147.13	16.0488	1122.11	29.0734	1122.11	29.0734	103.412
OK_MRLW_2_Run2-Spot 129	20.5042	25848.1	1.20132	12.974	2.60915	1.85598	3.35741	0.174641	2.11295	0.629339	1037.63	20.2512	1065.56	22.1575	1123.21	52.0247	1123.21	52.0247	92.3814
OK_MRLW_2_Run2-Spot 146	644.641	200596	3.97221	12.9218	1.0732	2.01375	2.33778	0.188724	2.07689	0.888402	1114.46	21.2558	1120.16	15.8623	1131.24	21.3705	1131.24	21.3705	98.516
OK_MRLW_2_Run2-Spot 214	120.153	35173.1	3.00172	12.9024	1.48094	2.07058	3.8075	0.193759	3.50768	0.921257	1141.71	36.7019	1139.12	26.0757	1134.19	29.4791	1134.19	29.4791	100.662
OK_MRLW_2_Run2-Spot 172	294.503	106996	2.5668	12.8932	1.28819	2.10879	2.16535	0.197193	1.74049	0.803793	1160.23	18.4808	1151.68	14.9153	1135.62	25.6358	1135.62	25.6358	102.167
OK_MRLW_2_Run2-Spot 155	654.475	220517	8.63495	12.8719	1.31819	2.06243	1.86512	0.192539	1.31948	0.707454	1135.12	13.7331	1136.43	12.7547	1138.94	26.2195	1138.94	26.2195	99.664
OK_MRLW_2_Run2-Spot 136	52.1595	61470.3	1.35057	12.8648	2.00316	1.85755	3.08537	0.173318	2.34667	0.76058	1030.36	22.346	1066.12	20.3677	1140	39.8497	1140	39.8497	90.3826
OK_MRLW_2_Run1-Spot 24	327.433	213071	1.84648	12.848	1.22887	2.09917	2.49833	0.195606	2.17521	0.870665	1151.67	22.9411	1148.54	17.184	1142.64	24.4112	1142.64	24.4112	100.791
OK_MRLW_2_Run2-Spot 154	171.702	39869.4	1.90512	12.8446	1.11864	2.08826	1.71274	0.194537	1.29697	0.757246	1145.91	13.616	1144.95	11.7601	1143.13	22.2175	1143.13	22.2175	100.242
OK_MRLW_2_Run2-Spot 211	18.8374	76321.1	0.663264	12.8246	3.97073	1.67779	4.69688	0.156055	2.50878	0.534137	934.817	21.8314	1000.14	29.8899	1146.25	78.9053	1146.25	78.9053	81.5543
OK_MRLW_2_Run1-Spot 26	180.447	134705	180.586	12.8187	1.3578	1.99411	1.93441	0.185392	1.37779	0.712255	1096.37	13.8909	1113.52	13.0823	1147.14	26.9756	1147.14	26.9756	95.574
OK_MRLW_2_Run2-Spot 180	258.252	116848	5.2183	12.7918	1.34658	2.1699	2.4631	0.201313	2.06242	0.837328	1182.37	22.2799	1171.45	17.1217	1151.32	26.7517	1151.32	26.7517	102.697
OK_MRLW_2_Run2-Spot 173	63.7482	41487.3	1.59154	12.775	1.72297	1.9046	2.16725	0.176467	1.31467	0.606607	1047.64	12.7121	1082.7	14.4306	1153.92	34.1974	1153.92	34.1974	90.7901
OK_MRLW_2_Run1-Spot 22	169.36	164619	2.14151	12.7465	1.47426	2.10201	2.20893	0.194324	1.64497	0.744692	1144.76	17.2537	1149.47	15.1997	1158.34	29.2537	1158.34	29.2537	98.8273
OK_MRLW_2_Run1-Spot 98	461.306	103883	2.17585	12.7294	1.09615	2.13423	1.87315	0.197037	1.51893	0.810897	1159.38	16.1175	1159.96	12.952	1161	21.7322	1161	21.7322	99.8605
OK_MRLW_2_Run1-Spot 68	251.547	110145	2.26428	12.7222	1.5305	2.07369	2.58038	0.191339	2.07748	0.805106	1128.62	21.5092	1140.15	17.6783	1162.14	30.3343	1162.14	30.3343	97.1162
OK_MRLW_2_Run1-Spot 73	87.1109	35084.5	2.04308	12.6465	1.99036	2.1219	3.65815	0.194623	3.06929	0.839028	1146.37	32.2346	1155.95	25.2515	1173.99	39.4001	1173.99	39.4001	97.6473
OK_MRLW_2_Run2-Spot 210	74.3513	223656	2.28034	12.6308	1.53074	2.05535	2.4096	0.188285	1.86092	0.772293	1112.08	19.0083	1134.07	16.4603	1176.44	30.2988	1176.44	30.2988	94.5292
OK_MRLW_2_Run2-Spot 179	54.1365	78572.9	1.01757	12.4988	2.06039	2.08826	2.87173	0.189301	2.00041	0.696585	1117.59	20.5257	1144.95	19.7196	1197.19	40.657	1197.19	40.657	93.3507
OK_MRLW_2_Run2-Spot 152	65.3756	191876	2.23236	12.4476	2.18275	2.09365	2.88386	0.189011	1.88474	0.653549	1116.02	19.314	1146.72	19.8195	1205.25	43.0093	1205.25	43.0093	92.5959
OK_MRLW_2_Run1-Spot 23	153.035	59212	3.56589	12.3933	1.51012	2.26367	2.68847	0.203469	2.22427	0.827338	1193.93	24.2422	1201.05	18.9361	1213.89	29.7112	1213.89	29.7112	98.3558
OK_MRLW_2_Run1-Spot 82	188.619	113218	2.95927	12.3768	0.957657	2.26758	2.7919	0.203549	2.62252	0.939331	1194.35	28.592	1202.26	19.6753	1216.5	18.8341	1216.5	18.8341	98.1799
OK_MRLW_2_Run2-Spot 121	83.6452	54093.3	1.54282	12.2976	1.68488	2.29161	2.28849	0.20439	1.54867	0.676721	1198.86	16.9422	1209.7	16.1788	1229.09	33.0782	1229.09	33.0782	97.5408
OK_MRLW_2_Run2-Spot 158	90.2592	115215	2.10516	12.2467	1.39614	2.30616	1.89122	0.204837	1.27573	0.674555	1201.25	13.9816	1214.18	13.3956	1237.26	27.374	1237.26	27.374	97.0894
OK_MRLW_2_Run1-Spot 15	282.962	54751.4	3.58961	12.1797	1.38422	2.40055	2.50394	0.212054	2.08654	0.833302	1239.75	23.5327	1242.76	17.9498	1248.01	27.0924	1248.01	27.0924	99.3387
OK_MRLW_2_Run1-Spot 29	111.193	29124.5	1.13673	12.1651	1.4724	2.22111	2.78687	0.195967	2.36616	0.849038	1153.62	24.9936	1187.72	19.5148	1250.34	28.8179	1250.34	28.8179	92.2643
OK_MRLW_2_Run2-Spot 204	316.099	50815.7	2.84354	12.0465	1.25595	2.52611	2.00094	0.220704	1.55767	0.778469	1285.6	18.155	1279.58	14.5563	1269.51	24.5152	1269.51	24.5152	101.267
OK_MRLW_2_Run2-Spot 186	175.378	116129	2.31992	12.0256	1.2287	2.59366	1.91726	0.226213	1.4718	0.767658	1314.62	17.5033	1298.85	14.0513	1272.88	23.9714	1272.88	23.9714	103.279
OK_MRLW_2_Run1-Spot 38	74.1757	123396	3.1645	11.9642	1.55751	2.50386	3.17427	0.217266	2.76589	0.871346	1267.41	31.8246	1273.15	23.0362	1282.84	30.3439	1282.84	30.3439	98.7972
OK_MRLW_2_Run2-Spot 161	148.099	75960.7	3.56732	11.9049	1.26073	2.4991	1.9371	0.215778	1.47068	0.759217	1259.53	16.8263	1271.77	14.0487	1292.52	24.5092	1292.52	24.5092	97.4477
OK_MRLW_2_Run1-Spot 27	131.946	31253.1	1.05661	11.8568	1.3209	2.58323	2.98006	0.222141	2.67133	0.896401	1293.18	31.3009	1295.9	21.8178	1300.38	25.6696	1300.38	25.6696	99.4461
OK_MRLW_2_Run1-Spot 8	527.727	144586	2.52537	11.8061	1.08352	2.6816	2.09367	0.229614	1.79149	0.855669	1332.48	21.5657	1323.4	15.4856	1308.71	21.0317	1308.71	21.0317	101.816
OK_MRLW_2_Run1-Spot 64	89.5268	87635.7	3.14631	11.7789	1.26744	2.75399	1.84585	0.235269	1.34192	0.726995	1362.05	16.4759	1343.17	13.7506	1313.19	24.5861	1313.19	24.5861	103.721
OK_MRLW_2_Run1-Spot 79	113.499	58051.4	2.04048	11.6121	1.48717	2.64183	2.46474	0.222492	1.96552	0.797455	1295.03	23.0604	1312.37	18.1565	1340.79	28.7381	1340.79	28.7381	96.5874
OK_MRLW_2_Run1-Spot 16	344.07	83359.4	1.23877	11.5615	1.03079	2.81201	1.96612	0.235793	1.67424	0.851547	1364.79	20.5932	1358.74	14.7276	1349.23	19.8949	1349.23	19.8949	101.153
OK_MRLW_2_Run2-Spot 139	59.793	45331.6	0.87057	11.5453	1.8394	2.80331	2.69416	0.234733	1.96853	0.730665	1359.25	24.1247	1356.42	20.166	1351.94	35.4906	1351.94	35.4906	100.541
OK_MRLW_2_Run1-Spot 74	135.367	40382.2	1.88106	11.4866	1.40453	2.81748	2.10308	0.23472	1.56532	0.744302	1359.19	19.1825	1360.2	15.7617	1361.76	27.0616	1361.76	27.0616	99.8115
OK_MRLW_2_Run2-Spot 187	58.0598	47210.9	1.7899	11.4131	1.5675	2.88387	3.41304	0.238714	3.0318	0.888298	1380.01	37.6644	1377.7	25.738	1374.11	30.1494	1374.11	30.1494	100.429
OK_MRLW_2_Run2-Spot 132	80.0611	74795.9	2.15631	11.3339	1.46754	2.81592	4.01426	0.231472	3.73639	0.930779	1342.21	45.2742	1359.78	30.0873	1387.5	28.1753	1387.5	28.1753	96.7356
OK_MRLW_2_Run1-Spot 71	216.183	100513	3.39875	11.2379	1.07495	3.00161	1.94058	0.244645	1.61565	0.83256	1410.8	20.4719	1408.03	14.7812	1403.82	20.5907	1403.82	20.5907	100.498
OK_MRLW_2_Run2-Spot 205	31.9299	107488	1.29181	10.9962	2.11311	2.95763	3.36447	0.235876	2.61809	0.778158	1365.22	32.2118	1396.81	25.5356	1445.34	40.2527	1445.34	40.2527	94.4566
OK_MRLW_2_Run1-Spot 81	170.312	70831.5	2.35914	10.9842	1.26301	2.87418	2.41331	0.228971	2.05642	0.852116	1329.1	24.6985	1375.17	18.1812	1447.42	24.0507	1447.42	24.0507	91.8259
OK_MRLW_2_Run2-Spot 142	195.981	70418.3	3.16055	10.9818	1.12764	3.11702	1.50755	0.248264	1.00057	0.663704	1429.52	12.8284	1436.9	11.5898	1447.83	21.4715	1447.83	21.4715	98.7354
OK_MRLW_2_Run2-Spot 206	150.331	95616.4	2.06991	10.9706	0.991332	3.08343	1.79862	0.245336	1.50076	0.834398	1414.38	19.0593	1428.58	13.7913	1449.78	18.871	1449.78	18.871	97.558
OK_MRLW_2_Run1-Spot 53	576.643	575074	1.1848	10.9591	0.982483	3.19719	1.84354	0.254122	1.55993	0.846158	1459.7	20.3764	1456.48	14.2601	1451.78	18.6975	1451.78	18.6975	100.546
OK_MRLW_2_Run2-Spot 199	119.628	69576	1.87111	10.8181	1.42562	3.19265	2.74953	0.250496	2.35106	0.855079	1441.04	30.3602	1455.38	21.2625	1476.37	27.0419	1476.37	27.0419	97.6063
OK_MRLW_2_Run2-Spot 184	150.766	70439.7	1.45903	10.813	1.1535	3.1763	3.70061	0.249096	3.51624	0.950178	1433.81	45.2037	1451.41	28.5856	1477.27	21.8773	1477.27	21.8773	97.0583
OK_MRLW_2_Run1-Spot 67	365.033	1.00185e+06	3.96706	10.7929	0.867654	3.27287	2.38538	0.256192	2.22199	0.931501	1470.33	29.2127	1474.63	18.5543	1480.8	16.4478	1480.8	16.4478	99.2932
OK_MRLW_2_Run2-Spot 215	306.234	99993	2.57452	10.7809	1.09761	3.28559	2.43587	0.256902	2.17457	0.892725	1473.97	28.6523	1477.65	18.9644	1482.91	20.8013	1482.91	20.8013	99.3972
OK_MRLW_2_Run1-Spot 97	328.804	152762	2.66802	10.7349	0.992999	3.26483	2.46698	0.254189	2.25831	0.915413	1460.04	29.5052	1472.71	19.1781	1491.01	18.7984	1491.01	18.7984	97.9235
OK_MRLW_2_Run1-Spot 48	139.151	86990.4	0.66064	10.6172	0.925878	3.41454	1.55486	0.26293	1.24914	0.803376	1504.81	16.7645	1507.75	12.2121	1511.85	17.4775	1511.85	17.4775	99.5344
OK_MRLW_2_Run1-Spot 77	129.006	90660.2	5.14794	10.461	2.05684	3.51934	2.63477	0.267012	1.64663	0.624963	1525.62	22.3701	1531.57	20.8362	1539.78	38.6865	1539.78	38.6865	99.0804
OK_MRLW_2_Run1-Spot 28	444.386	72414.4	54.5322	10.4357	0.874839	3.50192	2.34403	0.265048	2.17466	0.927743	1515.62	29.3718	1527.65	18.5161	1544.33	16.4446	1544.33	16.4446	98.1406
OK_MRLW_2_Run2-Spot 220	96.3922	56014.9	1.09692	10.2589	1.81715	3.58456	2.9869	0.266708	2.37056	0.793651	1524.07	32.1759	1546.12	23.7174	1576.37	34.0148	1576.37	34.0148	96.682
OK_MRLW_2_Run1-Spot 85	410.274	990767	4.17827	10.0673	1.35769	3.77886	2.60156	0.275913	2.21918	0.853022	1570.74	30.9361	1588.27	20.8911	1611.59	25.2967	1611.59	25.2967	97.4657
OK_MRLW_2_Run1-Spot 18	79.5871	110193	0.866968	9.93728	1.46847	4.01368	2.8895	0.289274	2.48854	0.861235	1637.9	35.9941	1636.97	23.4918	1635.76	27.2742	1635.76	27.2742	100.131
OK_MRLW_2_Run1-Spot 104	379.528	138442	1.31636	9.86334	1.0702	4.06706	3.34833	0.29094	3.17269	0.947545	1646.22	46.0947	1647.72	27.2953	1649.62	19.8421	1649.62	19.8421	99.794
OK_MRLW_2_Run2-Spot 144	57.0501	35575.2	2.06929	9.79006	1.2281	3.89713	2.57722	0.276712	2.2658	0.879162	1574.78	31.6576	1613.09	20.8279	1663.43	22.73	1663.43	22.73	94.6707
OK_MRLW_2_Run2-Spot 167	332.89	127913	2.19457	9.74703	1.21926	4.17785	1.92151	0.295341	1.48513	0.772895	1668.16	21.8284	1669.68	15.7438	1671.58	22.5429	1671.58	22.5429	99.7956
OK_MRLW_2_Run2-Spot 192	215.626	139473	2.38652	9.52346	1.58378	4.40528	2.4541	0.304276	1.87462	0.763876	1712.48	28.1925	1713.33	20.3112	1714.36	29.1237	1714.36	29.1237	99.8899
OK_MRLW_2_Run1-Spot 63	292.108	55411.6	3.04274	9.49544	1.05414	4.36767	2.1341	0.30079	1.85557	0.869488	1695.23	27.6602	1706.24	17.634	1719.78	19.3711	1719.78	19.3711	98.5722
OK_MRLW_2_Run1-Spot 103	258.131	248796	1.13807	9.45738	1.003	4.51649	2.25944	0.309793	2.02461	0.896069	1739.69	30.8697	1734.01	18.7853	1727.16	18.414	1727.16	18.414	100.725
OK_MRLW_2_Run2-Spot 169	240.292	399290	2.98722	9.4038	1.18688	4.49544	3.06894	0.306602	2.83014	0.922189	1723.96	42.8118	1730.13	25.4964	1737.58	21.762	1737.58	21.762	99.2161
OK_MRLW_2_Run2-Spot 191	84.1461	106948	5.1923	9.18993	1.44576	4.7447	2.46908	0.316242	2.00153	0.81064	1771.35	31.0005	1775.17	20.7094	1779.65	26.3712	1779.65	26.3712	99.5335
OK_MRLW_2_Run2-Spot 137	76.4233	66925.6	0.953343	9.10483	1.2346	4.73969	2.05945	0.312983	1.64836	0.800388	1755.37	25.33	1774.29	17.2697	1796.6	22.4702	1796.6	22.4702	97.705
OK_MRLW_2_Run2-Spot 165	861.548	1.26611e+06	5.58636	9.09314	0.969829	4.28246	2.20343	0.282427	1.97852	0.897927	1603.57	28.0889	1690	18.1398	1798.94	17.6488	1798.94	17.6488	89.1399
OK_MRLW_2_Run1-Spot 4	187.946	200200	1.44841	8.87297	1.33444	5.15699	3.82453	0.331867	3.58417	0.937154	1847.43	57.5735	1845.55	32.5375	1843.42	24.1511	1843.42	24.1511	100.217
OK_MRLW_2_Run2-Spot 125	62.2233	78449.9	0.344641	8.86075	1.51075	5.11421	2.25604	0.328661	1.67552	0.742681	1831.89	26.718	1838.47	19.1632	1845.91	27.3343	1845.91	27.3343	99.2402
OK_MRLW_2_Run1-Spot 83	183.543	162281	2.15307	8.42635	1.05048	5.45916	2.72658	0.333629	2.51609	0.922802	1855.95	40.5769	1894.2	23.4031	1936.36	18.8008	1936.36	18.8008	95.8474
OK_MRLW_2_Run2-Spot 197	254.023	101266	1.55316	8.32264	1.09162	5.8159	2.52595	0.351056	2.27789	0.901795	1939.64	38.1556	1948.78	21.8885	1958.5	19.4864	1958.5	19.4864	99.0372
OK_MRLW_2_Run2-Spot 209	136.556	92331.7	1.95341	7.87111	0.852257	6.07513	4.63154	0.346809	4.55246	0.982924	1919.34	75.5732	1986.68	40.4023	2057.49	15.0417	2057.49	15.0417	93.2855
OK_MRLW_2_Run1-Spot 87	188.584	182111	1.11633	7.76197	1.12498	6.83644	1.5579	0.384858	1.07772	0.691775	2098.94	19.3072	2090.45	13.8009	2082.1	19.7977	2082.1	19.7977	100.809
OK_MRLW_2_Run1-Spot 105	376.592	197014	1.25241	5.98894	1.06836	10.1226	1.66883	0.439683	1.28204	0.768222	2349.22	25.2402	2446.04	15.4228	2527.53	17.9377	2527.53	17.9377	92.9454
OK_MRLW_2_Run1-Spot 19	279.301	171068	21.4428	5.88932	1.59207	11.3121	2.65356	0.483176	2.1229	0.800019	2541.09	44.5828	2549.2	24.7603	2555.65	26.6548	2555.65	26.6548	99.4303
OK_MRLW_2_Run1-Spot 44	129.1	233742	0.994257	5.43678	1.16868	12.7201	2.51393	0.501571	2.22577	0.885374	2620.54	47.9284	2659.15	23.6698	2688.63	19.3167	2688.63	19.3167	97.4675
OK_MRLW_2_Run1-Spot 99	186.02	232461	1.29662	5.42067	1.20256	12.8714	1.55695	0.506031	0.988905	0.635155	2639.66	21.4199	2670.28	14.6703	2693.54	19.8678	2693.54	19.8678	97.9998
OK_MRLW_2_Run1-Spot 45	51.6376	236459	0.616917	5.41652	1.34752	12.9913	2.16111	0.510354	1.68955	0.781797	2658.14	36.8033	2679.02	20.3779	2694.81	22.2607	2694.81	22.2607	98.6394
OK_MRLW_2_Run2-Spot 159	97.6366	217884	1.22611	5.37311	1.11468	13.3519	1.55177	0.520317	1.07958	0.695706	2700.52	23.8182	2704.86	14.6596	2708.09	18.3939	2708.09	18.3939	99.7206
OK_MRLW_2_Run2-Spot 189	145.594	246903	0.967322	5.30523	1.34174	13.1641	2.42058	0.506518	2.01468	0.832314	2641.75	43.6668	2691.49	22.8467	2729.05	22.0944	2729.05	22.0944	96.801
OK_MRLW_2_Run2-Spot 131	32.3692	58268.8	0.7316	5.30426	1.27145	13.6168	2.15753	0.523839	1.74308	0.807909	2715.44	38.6279	2723.43	20.4111	2729.35	20.936	2729.35	20.936	99.4904
OK_MRLW_2_Run2-Spot 200	86.3109	104736	0.966407	5.23356	1.27613	13.6084	2.14911	0.516538	1.72921	0.804617	2684.48	37.9683	2722.85	20.3307	2751.42	20.9704	2751.42	20.9704	97.5672
OK_MRLW_2_Run2-Spot 149	32.3205	33805.1	1.90906	4.74788	1.08204	15.8733	3.3299	0.546595	3.1492	0.945732	2811	71.7505	2869.2	31.8179	2910.31	17.5318	2910.31	17.5318	96.5875
26a--Hennessey Shale, Oklahoma. ( 35°36'25.40"N 97°30'24.28"W)
OK-HENN-SS Run1-Spot 76	277.998	79743.2	1.27558	19.0525	2.18278	0.396745	2.61678	0.0548229	1.44326	0.551542	344.063	4.83555	339.284	7.54742	306.675	49.7197	344.063	4.83555	NA
OK-HENN-SS Run1-Spot 16	560.849	3.279e+06	0.882243	17.6092	1.30047	0.50886	2.16922	0.0649884	1.73618	0.800368	405.891	6.82973	417.682	7.42834	483.356	28.7281	405.891	6.82973	83.9736
OK-HENN-SS Run1-Spot 39	544.486	58193.2	1.36284	17.907	0.920917	0.508613	1.36412	0.0660553	1.00634	0.737725	412.346	4.01968	417.516	4.66975	446.16	20.4686	412.346	4.01968	92.4211
OK-HENN-SS Run1-Spot 78	619.431	78327.9	4.39765	17.8883	2.0511	0.571609	2.87123	0.0741595	2.00921	0.699775	461.167	8.94217	459.055	10.604	448.476	45.5862	461.167	8.94217	102.83
OK-HENN-SS Run1-Spot 97	95.908	33403.2	1.47834	16.8504	4.13273	0.697259	4.54114	0.0852122	1.88215	0.414466	527.159	9.52706	537.152	18.9448	579.788	89.8283	527.159	9.52706	90.9226
OK-HENN-SS Run1-Spot 61	523.13	140083	1.71498	17.2942	1.26309	0.698778	2.16969	0.0876473	1.76413	0.813079	541.608	9.1643	538.061	9.06237	523.033	27.7066	541.608	9.1643	103.551
OK-HENN-SS Run1-Spot 45	458.789	35901.6	3.48082	16.3365	1.26073	0.771424	2.51249	0.091401	2.17329	0.864992	563.818	11.7328	580.579	11.1102	646.734	27.1053	563.818	11.7328	87.1792
OK-HENN-SS Run1-Spot 31	578.654	52216.1	3.63337	16.298	1.37115	0.831862	2.02466	0.0983296	1.48969	0.735776	604.613	8.5974	614.645	9.33582	651.802	29.4326	604.613	8.5974	92.7602
OK-HENN-SS Run1-Spot 85	427.53	1.96565e+06	2.97162	16.4177	1.56668	0.831866	3.02386	0.0990523	2.58635	0.855315	608.853	15.0263	614.647	13.9437	636.072	33.7384	608.853	15.0263	95.7208
OK-HENN-SS Run1-Spot 29	181.524	46657.6	1.8817	16.1767	1.73359	0.86722	4.68514	0.101746	4.35261	0.929024	624.635	25.9124	634.056	22.0981	667.81	37.1064	624.635	25.9124	93.5349
OK-HENN-SS Run1-Spot 49	232.598	103166	1.69048	13.8832	3.96485	1.33191	4.39441	0.134111	1.89494	0.431215	811.273	14.4451	859.711	25.4908	986.79	80.7312	811.273	14.4451	82.2134
OK-HENN-SS Run1-Spot 56	106.356	45994.7	2.59906	14.2018	2.5501	1.52162	3.53055	0.156729	2.44167	0.691584	938.573	21.3267	939.131	21.6354	940.461	52.2598	940.461	52.2598	99.7992
OK-HENN-SS Run1-Spot 60	273.446	235397	2.18097	13.8822	1.19766	1.59101	2.20171	0.160188	1.84747	0.839107	957.822	16.4436	966.692	13.7284	986.903	24.3523	986.903	24.3523	97.0533
OK-HENN-SS Run1-Spot 52	330.859	131105	3.15671	13.8488	0.941795	1.69213	1.62701	0.169959	1.32671	0.815433	1011.89	12.4242	1005.57	10.3842	991.826	19.1321	991.826	19.1321	102.023
OK-HENN-SS Run1-Spot 12	100.12	38606.5	2.54421	13.7706	2.07766	1.54243	2.41095	0.154048	1.22311	0.507314	923.615	10.5249	947.473	14.8527	1003.31	42.1776	1003.31	42.1776	92.0572
OK-HENN-SS Run1-Spot 89	490.754	90383	4.60247	13.7524	1.10042	1.65263	2.12926	0.164836	1.82286	0.8561	983.598	16.6288	990.559	13.4705	1005.99	22.3139	1005.99	22.3139	97.7744
OK-HENN-SS Run1-Spot 4	61.9888	22004.6	1.72222	13.6916	1.50842	1.68188	3.89969	0.167012	3.59614	0.922162	995.626	33.1766	1001.69	24.8372	1014.97	30.5771	1014.97	30.5771	98.094
OK-HENN-SS Run1-Spot 55	221.512	56690.7	1.50623	13.6831	1.71425	1.65676	2.90137	0.164415	2.34079	0.806788	981.266	21.3067	992.139	18.3733	1016.24	34.7296	1016.24	34.7296	96.5587
OK-HENN-SS Run1-Spot 37	198.444	78419.6	4.49385	13.6754	1.3607	1.67483	2.34651	0.166115	1.9117	0.814699	990.669	17.5552	999.019	14.9196	1017.37	27.5802	1017.37	27.5802	97.3753
OK-HENN-SS Run1-Spot 77	388.484	188764	2.62997	13.6734	1.04051	1.77139	1.88117	0.175666	1.56721	0.833104	1043.26	15.0956	1035.03	12.2094	1017.67	21.0619	1017.67	21.0619	102.514
OK-HENN-SS Run1-Spot 79	50.7486	217308	0.997765	13.6426	2.1949	1.70773	3.20331	0.168972	2.33315	0.728357	1006.45	21.7407	1011.44	20.5164	1022.24	44.4378	1022.24	44.4378	98.4554
OK-HENN-SS Run1-Spot 44	527.152	68098.8	30.5558	13.4392	1.3788	1.74467	2.7702	0.170053	2.4027	0.867335	1012.4	22.5111	1025.19	17.8817	1052.61	27.7992	1052.61	27.7992	96.1805
OK-HENN-SS Run1-Spot 84	155.61	48636.1	2.07384	13.4342	1.53033	1.70782	2.55729	0.1664	2.04886	0.801184	992.244	18.8425	1011.47	16.3784	1053.36	30.8491	1053.36	30.8491	94.1983
OK-HENN-SS Run1-Spot 68	230.149	67768.4	0.891584	13.3845	1.2676	1.85401	1.81005	0.179975	1.29208	0.713836	1066.84	12.7042	1064.86	11.9398	1060.82	25.516	1060.82	25.516	100.568
OK-HENN-SS Run1-Spot 101	101.957	46145.9	2.00517	13.3837	1.71894	1.70922	2.36051	0.165911	1.61779	0.685358	989.542	14.8406	1011.99	15.1224	1060.93	34.6099	1060.93	34.6099	93.271
OK-HENN-SS Run1-Spot 46	302.745	97776.3	2.08398	13.3786	1.14007	1.9183	2.16293	0.186134	1.83807	0.849806	1100.4	18.5941	1087.48	14.4374	1061.7	22.9572	1061.7	22.9572	103.645
OK-HENN-SS Run1-Spot 3	205.871	55280	1.24422	13.3674	1.12974	1.78914	4.83436	0.173456	4.7005	0.972311	1031.12	44.791	1041.51	31.4979	1063.4	22.7257	1063.4	22.7257	96.9649
OK-HENN-SS Run1-Spot 50	206.677	156288	3.79392	13.3673	2.26608	1.78805	2.80143	0.173349	1.64708	0.587943	1030.54	15.6866	1041.11	18.2446	1063.41	45.5871	1063.41	45.5871	96.9091
OK-HENN-SS Run1-Spot 88	242.588	149062	1.59534	13.316	1.60126	1.85875	2.63159	0.179513	2.08836	0.793572	1064.31	20.4888	1066.54	17.3754	1071.13	32.1805	1071.13	32.1805	99.3635
OK-HENN-SS Run1-Spot 87	797.007	85796.5	1.90337	13.1985	1.33895	1.85456	2.23653	0.177526	1.79144	0.800993	1053.45	17.4106	1065.05	14.7549	1088.91	26.8311	1088.91	26.8311	96.743
OK-HENN-SS Run1-Spot 36	682.312	181358	2.08706	13.1918	0.948997	1.7417	1.35325	0.166639	0.964722	0.712893	993.565	8.88301	1024.09	8.72915	1089.93	18.9945	1089.93	18.9945	91.1584
OK-HENN-SS Run1-Spot 72	715.924	75084.6	5.23186	13.0851	1.22563	1.91304	2.0882	0.181551	1.69068	0.809637	1075.44	16.7466	1085.65	13.9254	1106.17	24.4782	1106.17	24.4782	97.2221
OK-HENN-SS Run1-Spot 98	136.026	114827	1.76438	12.903	1.85833	1.99835	3.94879	0.187009	3.48418	0.882342	1105.15	35.386	1114.95	26.729	1134.09	37.002	1134.09	37.002	97.4479
OK-HENN-SS Run1-Spot 93	96.6568	473301	1.21461	12.8829	1.45151	1.91897	2.14836	0.1793	1.58385	0.737236	1063.15	15.5235	1087.71	14.3418	1137.23	28.8799	1137.23	28.8799	93.4857
OK-HENN-SS Run1-Spot 9	199.371	782526	1.81571	12.6993	1.0682	2.1694	1.7164	0.199811	1.3435	0.782741	1174.3	14.4232	1171.29	11.9298	1165.7	21.1817	1165.7	21.1817	100.738
OK-HENN-SS Run1-Spot 35	104.042	28999.5	0.948379	12.6745	2.17856	2.09633	3.13013	0.192703	2.24758	0.718046	1136	23.4095	1147.6	21.5214	1169.57	43.1613	1169.57	43.1613	97.1298
OK-HENN-SS Run1-Spot 1	126.94	43747.1	3.27696	12.6708	1.44905	2.09196	2.03263	0.192246	1.42543	0.701273	1133.53	14.8168	1146.17	13.9648	1170.14	28.6913	1170.14	28.6913	96.8708
OK-HENN-SS Run1-Spot 10	156.665	26966.7	1.02532	12.4683	1.81518	1.87821	2.51115	0.169843	1.73523	0.69101	1011.25	16.2404	1073.43	16.6404	1202	35.7946	1202	35.7946	84.1302
OK-HENN-SS Run1-Spot 73	93.3392	31091.9	1.04925	12.4244	1.66215	2.34891	2.37342	0.21166	1.69422	0.71383	1237.66	19.0787	1227.23	16.9047	1208.96	32.7263	1208.96	32.7263	102.373
OK-HENN-SS Run1-Spot 96	731.772	949056	3.32788	12.4094	1.25086	2.128	2.83246	0.191523	2.54129	0.897203	1129.62	26.3325	1157.94	19.5682	1211.3	24.619	1211.3	24.619	93.2564
OK-HENN-SS Run1-Spot 102	280.498	96849.4	1.7788	12.4053	0.78296	2.13173	1.48227	0.191796	1.25861	0.849109	1131.1	13.0571	1159.15	10.2452	1211.98	15.4085	1211.98	15.4085	93.3262
OK-HENN-SS Run1-Spot 25	142.249	78040.6	2.6669	12.3938	1.52876	2.17463	2.47551	0.195474	1.94706	0.786529	1150.96	20.5233	1172.96	17.2198	1213.79	30.0681	1213.79	30.0681	94.8232
OK-HENN-SS Run1-Spot 47	88.4121	141493	1.23437	12.3802	1.66565	2.01019	2.05968	0.180494	1.21157	0.588233	1069.67	11.9417	1118.96	13.9669	1215.98	32.7512	1215.98	32.7512	87.9681
OK-HENN-SS Run1-Spot 92	613.375	1.44689e+06	3.49948	12.3449	1.43751	2.27352	2.7641	0.203555	2.3609	0.854128	1194.39	25.7403	1204.11	19.4949	1221.58	28.2612	1221.58	28.2612	97.7747
OK-HENN-SS Run1-Spot 105	269.755	45746.4	0.944055	12.3343	1.87566	1.84409	4.94962	0.164966	4.58047	0.925417	984.317	41.8134	1061.32	32.5979	1223.23	36.8549	1223.23	36.8549	80.4684
OK-HENN-SS Run1-Spot 5	793.237	70273	3.16259	12.3205	1.51425	2.01285	2.13333	0.179861	1.50272	0.704399	1066.22	14.7674	1119.85	14.4728	1225.44	29.7435	1225.44	29.7435	87.0066
OK-HENN-SS Run1-Spot 71	340.418	119077	7.88146	12.1465	1.18482	2.37656	2.48405	0.209362	2.18328	0.878918	1225.42	24.3653	1235.58	17.7545	1253.32	23.1611	1253.32	23.1611	97.7741
OK-HENN-SS Run1-Spot 28	108.271	78490.2	0.954597	12.1288	1.11103	2.21246	3.63975	0.194622	3.46603	0.952272	1146.37	36.4013	1184.99	25.4584	1256.21	21.7093	1256.21	21.7093	91.2561
OK-HENN-SS Run1-Spot 67	109.709	117169	0.95068	11.7108	1.17056	2.65394	1.73928	0.225411	1.28641	0.739627	1310.4	15.2543	1315.74	12.8278	1324.43	22.6715	1324.43	22.6715	98.941
OK-HENN-SS Run1-Spot 53	359.15	248522	5.07813	11.6939	1.33116	2.67113	3.19482	0.226545	2.90429	0.909062	1316.37	34.5806	1320.51	23.6075	1327.21	25.7715	1327.21	25.7715	99.1829
OK-HENN-SS Run1-Spot 69	339.796	85263.7	0.837024	11.5633	0.905206	2.59347	2.33627	0.2175	2.15378	0.921888	1268.65	24.8035	1298.8	17.1223	1348.93	17.4705	1348.93	17.4705	94.0486
OK-HENN-SS Run1-Spot 19	294.446	158213	2.52808	11.4783	1.34911	2.70383	3.28119	0.225091	2.99101	0.911561	1308.72	35.4266	1329.51	24.3261	1363.14	25.989	1363.14	25.989	96.0075
OK-HENN-SS Run1-Spot 17	90.6035	73052	1.55294	11.4682	1.34334	2.78245	2.32845	0.23143	1.90188	0.816797	1341.99	23.0416	1350.84	17.3938	1364.85	25.8719	1364.85	25.8719	98.3252
OK-HENN-SS Run1-Spot 26	167.002	132232	2.26009	11.4539	1.60761	2.82334	2.64403	0.234539	2.09916	0.793925	1358.24	25.7085	1361.76	19.8277	1367.25	30.9513	1367.25	30.9513	99.341
OK-HENN-SS Run1-Spot 27	151.033	94156.2	2.76713	11.3677	1.51539	2.8596	2.32568	0.235764	1.7642	0.758572	1364.64	21.6975	1371.34	17.4979	1381.77	29.1167	1381.77	29.1167	98.7598
OK-HENN-SS Run1-Spot 91	107.312	248364	3.10035	11.0981	1.36921	2.93765	2.40463	0.236455	1.97674	0.822055	1368.24	24.3691	1391.67	18.2174	1427.74	26.1426	1427.74	26.1426	95.8327
OK-HENN-SS Run1-Spot 43	176.469	82070.5	2.45482	10.9637	1.54546	3.13351	3.82062	0.249166	3.49409	0.914536	1434.17	44.9291	1440.96	29.4169	1450.97	29.4156	1450.97	29.4156	98.8425
OK-HENN-SS Run1-Spot 103	253.225	78636.9	3.21345	10.8425	1.23979	2.56914	2.67215	0.20203	2.36713	0.885852	1186.22	25.6474	1291.9	19.5329	1472.09	23.5302	1472.09	23.5302	80.5803
OK-HENN-SS Run1-Spot 11	59.711	37135.8	0.395758	10.7474	2.34981	2.87206	2.87638	0.223871	1.6589	0.576734	1302.3	19.5615	1374.61	21.6667	1488.8	44.5006	1488.8	44.5006	87.473
OK-HENN-SS Run1-Spot 75	360.313	143206	2.8342	10.6681	1.36792	3.14989	3.11192	0.243715	2.79515	0.898207	1405.98	35.3093	1444.97	23.9882	1502.81	25.8542	1502.81	25.8542	93.5569
OK-HENN-SS Run1-Spot 80	213.591	152857	2.10668	10.6401	1.14227	2.9809	1.84212	0.230034	1.44521	0.784535	1334.68	17.4231	1402.76	14.0069	1507.78	21.5746	1507.78	21.5746	88.5195
OK-HENN-SS Run1-Spot 24	536.683	86598.6	2.45599	10.6394	1.43112	3.2029	3.99708	0.247149	3.7321	0.933706	1423.75	47.6781	1457.86	30.9386	1507.91	27.0305	1507.91	27.0305	94.419
OK-HENN-SS Run1-Spot 86	309.598	26922	2.35354	10.6172	6.13384	2.73103	6.49475	0.210299	2.13488	0.328709	1230.41	23.9132	1336.94	48.3078	1511.84	115.898	1511.84	115.898	81.3847
OK-HENN-SS Run1-Spot 100	85.3916	358560	1.53486	10.4326	1.45257	3.63316	2.15445	0.274901	1.59113	0.738533	1565.63	22.117	1556.83	17.156	1544.88	27.3018	1544.88	27.3018	101.343
OK-HENN-SS Run1-Spot 2	520.156	168907	3.35438	10.4076	1.29733	3.44313	1.82538	0.259897	1.28411	0.703478	1489.32	17.0761	1514.3	14.364	1549.39	24.3706	1549.39	24.3706	96.1226
OK-HENN-SS Run1-Spot 99	191.517	97598.4	1.50078	10.3921	1.39762	2.86601	6.80416	0.216014	6.65907	0.978677	1260.78	76.2596	1373.02	51.2611	1552.18	26.2436	1552.18	26.2436	81.226
OK-HENN-SS Run1-Spot 6	555.764	61908.9	1.80431	10.3653	1.00364	3.22849	1.35633	0.242705	0.912331	0.672645	1400.74	11.4863	1464.03	10.5154	1557.04	18.8327	1557.04	18.8327	89.9617
OK-HENN-SS Run1-Spot 54	202.659	62100.7	2.4596	10.2731	1.25543	3.86995	4.02424	0.28834	3.8234	0.950093	1633.23	55.1637	1607.44	32.482	1573.79	23.5066	1573.79	23.5066	103.777
OK-HENN-SS Run1-Spot 109	198.678	93356.8	1.99507	10.054	1.26491	3.96815	3.50348	0.289352	3.26717	0.932549	1638.29	47.2665	1627.71	28.4208	1614.04	23.5604	1614.04	23.5604	101.503
OK-HENN-SS Run1-Spot 8	176.374	227808	0.918003	9.99545	1.08164	3.88166	2.51169	0.281396	2.26686	0.902523	1598.39	32.0908	1609.87	20.2817	1624.91	20.118	1624.91	20.118	98.3679
OK-HENN-SS Run1-Spot 59	72.8876	154526	2.60658	9.97265	2.37324	3.65225	3.2882	0.264162	2.27596	0.69216	1511.1	30.6587	1561	26.2169	1629.16	44.1223	1629.16	44.1223	92.7534
OK-HENN-SS Run1-Spot 14	227.766	78456.4	2.14715	9.90496	1.53596	4.11955	3.55455	0.295938	3.20557	0.90182	1671.14	47.1898	1658.19	29.0503	1641.81	28.506	1641.81	28.506	101.786
OK-HENN-SS Run1-Spot 42	135.71	96583.2	1.63155	9.83163	1.35658	3.99213	2.93922	0.284661	2.60744	0.887118	1614.8	37.2457	1632.6	23.8705	1655.59	25.1333	1655.59	25.1333	97.5361
OK-HENN-SS Run1-Spot 30	153.293	145566	1.67985	9.78141	1.2463	4.0528	1.97094	0.287512	1.52687	0.774692	1629.08	21.9799	1644.86	16.0532	1665.07	23.062	1665.07	23.062	97.8388
OK-HENN-SS Run1-Spot 33	349.22	52003.5	1.2454	9.65454	1.1835	3.91091	2.14503	0.273847	1.78899	0.834015	1560.3	24.7923	1615.94	17.3469	1689.19	21.8327	1689.19	21.8327	92.3696
OK-HENN-SS Run1-Spot 110	188.897	111896	1.75313	9.52107	1.38733	4.2541	2.27444	0.29376	1.80234	0.79243	1660.29	26.3812	1684.53	18.701	1714.83	25.5106	1714.83	25.5106	96.8197
OK-HENN-SS Run1-Spot 32	168.111	53015.7	4.22344	9.47205	1.79016	3.64778	2.73822	0.250594	2.072	0.756696	1441.54	26.7649	1560.02	21.8247	1724.31	32.8787	1724.31	32.8787	83.6008
OK-HENN-SS Run1-Spot 64	163.615	59989.4	1.3036	9.44859	1.27745	4.28533	3.02237	0.293664	2.73914	0.906287	1659.81	40.0836	1690.55	24.8873	1728.87	23.4484	1728.87	23.4484	96.0058
OK-HENN-SS Run1-Spot 81	96.3466	113126	2.63162	9.26882	1.24879	4.74194	2.24657	0.318771	1.86751	0.831271	1783.73	29.1	1774.68	18.8407	1764.05	22.8202	1764.05	22.8202	101.116
OK-HENN-SS Run1-Spot 90	539.166	308309	3.28515	9.13829	1.10896	4.6767	2.29438	0.309959	2.00858	0.875434	1740.5	30.6378	1763.08	19.1951	1789.92	20.2015	1789.92	20.2015	97.2391
OK-HENN-SS Run1-Spot 63	263.773	111642	2.70579	9.08901	1.28551	3.90158	3.69188	0.257191	3.46084	0.937421	1475.45	45.6417	1614.01	29.8474	1799.77	23.3878	1799.77	23.3878	81.9803
OK-HENN-SS Run1-Spot 104	652.875	376397	6.12865	9.02259	1.33276	4.66661	3.68286	0.305373	3.43325	0.932224	1717.9	51.7761	1761.27	30.8053	1813.1	24.21	1813.1	24.21	94.7492
OK-HENN-SS Run1-Spot 22	333.094	130421	2.13512	8.9808	0.852818	4.77413	1.52762	0.310962	1.26741	0.829662	1745.44	19.38	1780.36	12.8256	1821.53	15.4747	1821.53	15.4747	95.823
OK-HENN-SS Run1-Spot 74	398.407	174666	6.73053	8.91716	0.992514	4.95718	1.40039	0.320597	0.987937	0.705471	1792.64	15.461	1812.05	11.833	1834.42	17.9816	1834.42	17.9816	97.7225
OK-HENN-SS Run1-Spot 83	256.921	204660	1.6024	8.75982	1.32499	4.65407	6.14748	0.295683	6.00299	0.976496	1669.87	88.3162	1759.02	51.4244	1866.61	23.9108	1866.61	23.9108	89.4598
OK-HENN-SS Run1-Spot 58	351.21	1.94647e+06	1.16992	8.26117	1.29481	5.83342	2.58946	0.349513	2.2425	0.866008	1932.27	37.4405	1951.39	22.4489	1971.72	23.0783	1971.72	23.0783	97.9996
OK-HENN-SS Run1-Spot 62	236.925	756635	1.01268	8.22386	0.937253	5.26993	2.39055	0.314325	2.19915	0.919937	1761.96	33.9042	1864	20.4046	1979.78	16.6887	1979.78	16.6887	88.9975
OK-HENN-SS Run1-Spot 20	1159.32	2.81477e+06	2.0536	6.4949	0.962053	8.79769	1.86602	0.414419	1.5989	0.856852	2235.09	30.1999	2317.25	17.015	2390.44	16.3749	2390.44	16.3749	93.5013
OK-HENN-SS Run1-Spot 15	58.0786	60987	0.542386	5.33674	1.2947	12.4727	2.3843	0.482766	2.00216	0.839726	2539.3	42.0231	2640.67	22.4165	2719.29	21.3389	2719.29	21.3389	93.3811
OK-HENN-SS Run1-Spot 48	91.3542	126024	0.762011	5.23879	0.803461	12.6537	2.21309	0.480781	2.06209	0.93177	2530.67	43.1608	2654.22	20.8285	2749.78	13.2071	2749.78	13.2071	92.0317
OK-HENN-SS Run1-Spot 40	226.554	48430.2	1.65948	5.07198	3.46718	13.8088	3.80637	0.507962	1.57072	0.412655	2647.92	34.1084	2736.68	36.0545	2802.83	56.7273	2802.83	56.7273	94.4731
OK-HENN-SS Run1-Spot 94	258.48	148832	1.69091	4.95083	1.41831	15.043	3.05333	0.540145	2.70393	0.885567	2784.06	61.133	2817.96	29.0785	2842.3	23.1159	2842.3	23.1159	97.9508
OK-HENN-SS Run1-Spot 108	558.368	338661	12.154	4.80046	1.34715	16.1219	1.97175	0.561305	1.43978	0.730206	2872.02	33.368	2884.05	18.8536	2892.45	21.8582	2892.45	21.8582	99.2935
OK-HENN-SS Run1-Spot 21	298.637	94483.5	2.84191	3.17454	1.15959	28.1161	1.68945	0.647345	1.22866	0.727252	3217.82	31.1246	3423.15	16.5667	3545.61	17.8608	3545.61	17.8608	90.7551
28--Garber Sandstone, Oklahoma. ( 35°13'36.98"N 97°18'27.92"W)
OK-GBR-1 Run1-Spot 52	310.362	41776.9	2.81097	18.451	1.34776	0.455357	1.91168	0.0609354	1.35575	0.709193	381.312	5.01971	381.024	6.07342	379.254	30.2884	381.312	5.01971	NA
OK-GBR-1 Run1-Spot 11	76.4311	29594.9	2.4159	18.2146	3.03298	0.511727	3.56211	0.0676016	1.86805	0.524424	421.69	7.62527	419.61	12.244	408.171	67.8669	421.69	7.62527	103.312
OK-GBR-1 Run1-Spot 16	376.356	60952.1	8.23995	18.321	1.37575	0.50957	1.74691	0.0677098	1.07658	0.616274	422.343	4.4011	418.16	5.98766	395.128	30.8531	422.343	4.4011	106.888
OK-GBR-1 Run1-Spot 40	138.631	25621.4	2.66082	17.9449	1.90652	0.529863	2.20463	0.068961	1.10706	0.502152	429.893	4.60395	431.719	7.75327	441.453	42.4349	429.893	4.60395	97.3815
OK-GBR-1 Run1-Spot 14	456.414	67843.2	2.29857	18.1407	1.26285	0.53158	1.7955	0.0699394	1.27633	0.710851	435.791	5.3783	432.858	6.32775	417.259	28.2112	435.791	5.3783	104.441
OK-GBR-1 Run1-Spot 41	148.658	35913.1	4.11963	18.1142	2.01281	0.539516	2.44314	0.0708796	1.38476	0.566794	441.453	5.90845	438.105	8.6938	420.53	44.9506	441.453	5.90845	104.975
OK-GBR-1 Run1-Spot 51	435.338	229860	2.25347	17.2687	1.16836	0.605992	2.05957	0.0758973	1.69611	0.823524	471.588	7.71307	481.029	7.89113	526.308	25.5929	471.588	7.71307	89.6031
OK-GBR-1 Run1-Spot 89	366.484	62583	10.3794	17.0094	1.01795	0.747158	2.34031	0.092172	2.10733	0.900448	568.37	11.4646	566.574	10.1624	559.365	22.2017	568.37	11.4646	101.61
OK-GBR-1 Run1-Spot 21	573.669	212785	4.85238	16.3931	0.774198	0.894835	1.37953	0.10639	1.14181	0.827679	651.75	7.07793	648.963	6.61516	639.304	16.6728	651.75	7.07793	101.947
OK-GBR-1 Run1-Spot 84	601.374	72154.8	6.53963	15.8206	1.00508	0.943756	1.8411	0.108288	1.54254	0.83784	662.798	9.71592	674.846	9.07687	715.248	21.3504	662.798	9.71592	92.6668
OK-GBR-1 Run1-Spot 68	113.643	98841.2	2.78186	15.8389	1.67938	0.959429	2.22741	0.110214	1.46322	0.656916	673.99	9.36393	683	11.0747	712.789	35.6863	673.99	9.36393	94.5567
OK-GBR-1 Run1-Spot 7	253.263	227891	1.55487	16.1667	1.24662	0.958002	1.82773	0.112328	1.33661	0.731297	686.253	8.70117	682.261	9.08042	669.115	26.6806	686.253	8.70117	102.561
OK-GBR-1 Run1-Spot 3	510.159	181196	4.70978	15.9206	0.688332	0.978141	1.56969	0.112943	1.41071	0.898724	689.815	9.22876	692.651	7.88126	701.889	14.6442	689.815	9.22876	98.2799
OK-GBR-1 Run1-Spot 82	235.188	113372	0.96204	14.8018	1.23109	1.31795	1.83686	0.141486	1.36326	0.742168	853.061	10.8928	853.617	10.6052	855.077	25.5624	853.061	10.8928	99.7642
OK-GBR-1 Run1-Spot 58	144.66	62820.6	5.70461	14.3573	1.37963	1.4724	1.91038	0.15332	1.32143	0.69171	919.544	11.3243	919.112	11.5525	918.095	28.3937	918.095	28.3937	100.158
OK-GBR-1 Run1-Spot 100	40.2286	16299	2.80538	14.229	1.58784	1.49394	2.22729	0.154172	1.56192	0.701264	924.31	13.4497	927.923	13.5481	936.525	32.5835	936.525	32.5835	98.6957
OK-GBR-1 Run1-Spot 36	71.0615	55092.2	1.71928	14.0915	1.39768	1.56431	2.06674	0.159874	1.52246	0.736651	956.077	13.528	956.176	12.8024	956.385	28.5636	956.385	28.5636	99.9678
OK-GBR-1 Run1-Spot 47	102.227	44161.3	5.6448	13.9779	1.27653	1.56585	1.74136	0.158742	1.1844	0.680158	949.783	10.4598	956.786	10.7908	972.94	26.0223	972.94	26.0223	97.6199
OK-GBR-1 Run1-Spot 81	103.635	223869	2.31232	13.9032	1.37614	1.57983	1.8819	0.159303	1.28366	0.682111	952.902	11.371	962.304	11.7021	983.83	28.0173	983.83	28.0173	96.8563
OK-GBR-1 Run1-Spot 67	259.926	54615.4	3.31895	13.7122	1.18106	1.75689	1.65231	0.174723	1.15552	0.699337	1038.08	11.0792	1029.7	10.6921	1011.93	23.9324	1011.93	23.9324	102.584
OK-GBR-1 Run1-Spot 73	330.943	176002	2.23898	13.6889	0.915279	1.73422	1.58157	0.172176	1.28982	0.81553	1024.09	12.2132	1021.32	10.186	1015.37	18.5338	1015.37	18.5338	100.859
OK-GBR-1 Run1-Spot 85	122.116	109177	4.69015	13.6852	1.75647	1.76792	3.15466	0.175474	2.62044	0.830657	1042.2	25.217	1033.76	20.4621	1015.92	35.6058	1015.92	35.6058	102.587
OK-GBR-1 Run1-Spot 97	853.247	899240	8.16051	13.652	0.914106	1.71554	1.64034	0.169862	1.36203	0.830334	1011.35	12.7487	1014.36	10.5226	1020.84	18.5065	1020.84	18.5065	99.07
OK-GBR-1 Run1-Spot 86	101.146	3.49996e+06	4.23914	13.6508	1.8262	1.67827	2.29051	0.166157	1.38254	0.603596	990.905	12.6987	1000.33	14.5747	1021.01	36.9738	1021.01	36.9738	97.051
OK-GBR-1 Run1-Spot 109	224.001	84797.6	4.34873	13.6287	1.50241	1.77587	1.96636	0.175535	1.26859	0.64515	1042.54	12.2115	1036.67	12.774	1024.29	30.4006	1024.29	30.4006	101.781
OK-GBR-1 Run1-Spot 2	58.1375	32964.7	4.41436	13.6259	2.402	1.71688	2.84355	0.16967	1.5219	0.535211	1010.29	14.2314	1014.86	18.2477	1024.71	48.6243	1024.71	48.6243	98.5931
OK-GBR-1 Run1-Spot 33	105.187	169232	7.41661	13.621	1.08324	1.75919	1.7976	0.173788	1.43455	0.798038	1032.95	13.6919	1030.55	11.6378	1025.44	21.9335	1025.44	21.9335	100.732
OK-GBR-1 Run1-Spot 69	161.954	128394	2.61027	13.5929	1.12357	1.71733	2.04915	0.169302	1.71366	0.836277	1008.27	15.9948	1015.03	13.1504	1029.62	22.7357	1029.62	22.7357	97.926
OK-GBR-1 Run1-Spot 55	96.9052	58737.8	1.5836	13.5744	1.65698	1.7706	2.30729	0.174316	1.60562	0.69589	1035.85	15.3644	1034.74	14.9731	1032.38	33.5059	1032.38	33.5059	100.336
OK-GBR-1 Run1-Spot 98	56.3593	40424.3	3.81916	13.557	1.99279	1.75271	2.40706	0.172335	1.35009	0.560889	1024.97	12.794	1028.16	15.5633	1034.95	40.2778	1034.95	40.2778	99.0349
OK-GBR-1 Run1-Spot 19	108.172	50191.4	2.67753	13.5448	1.26775	1.61666	2.07116	0.158814	1.63784	0.790784	950.184	14.4699	976.694	12.9939	1036.77	25.6224	1036.77	25.6224	91.6481
OK-GBR-1 Run1-Spot 30	131.987	169027	1.52583	13.531	1.45309	1.74298	2.13186	0.171048	1.55992	0.731719	1017.88	14.6881	1024.57	13.7557	1038.84	29.3567	1038.84	29.3567	97.9824
OK-GBR-1 Run1-Spot 35	100.836	80676.8	1.79775	13.4653	1.35319	1.88147	1.8752	0.183743	1.29817	0.692283	1087.39	12.9899	1074.58	12.4332	1048.69	27.2997	1048.69	27.2997	103.69
OK-GBR-1 Run1-Spot 48	304.384	754237	24.3676	13.4431	1.01155	1.85885	1.8165	0.181235	1.50879	0.830602	1073.72	14.9229	1066.58	11.9933	1052.02	20.4016	1052.02	20.4016	102.063
OK-GBR-1 Run1-Spot 95	529.342	64316.4	3.22208	13.3985	0.951432	1.85281	1.80117	0.180047	1.52937	0.849101	1067.23	15.0425	1064.43	11.8785	1058.71	19.1656	1058.71	19.1656	100.805
OK-GBR-1 Run1-Spot 53	218.536	1.16411e+06	2.92145	13.3813	1.34752	1.81361	1.84906	0.176011	1.26617	0.684767	1045.15	12.2164	1050.38	12.1027	1061.3	27.1166	1061.3	27.1166	98.4781
OK-GBR-1 Run1-Spot 74	161.424	133079	1.96038	13.3508	1.01798	1.84795	1.58005	0.178935	1.20842	0.764797	1061.16	11.8234	1062.7	10.4106	1065.89	20.4576	1065.89	20.4576	99.5557
OK-GBR-1 Run1-Spot 78	89.137	36021.3	1.70596	13.3487	1.73389	1.90484	1.99991	0.184415	0.99663	0.498337	1091.05	10.0033	1082.78	13.3169	1066.21	34.8652	1066.21	34.8652	102.33
OK-GBR-1 Run1-Spot 76	174.222	133265	2.74224	13.3175	0.969817	1.85402	1.39736	0.179075	1.00602	0.719943	1061.92	9.84961	1064.86	9.2174	1070.91	19.4681	1070.91	19.4681	99.16
OK-GBR-1 Run1-Spot 8	132.106	581829	2.56583	13.2793	1.2633	1.83611	1.80599	0.176836	1.2906	0.714625	1049.67	12.5016	1058.47	11.8724	1076.68	25.3615	1076.68	25.3615	97.4911
OK-GBR-1 Run1-Spot 57	28.2151	30384.7	1.1574	13.2625	2.60017	1.91907	3.26579	0.184592	1.97599	0.605056	1092.01	19.8494	1087.74	21.8037	1079.19	52.1883	1079.19	52.1883	101.188
OK-GBR-1 Run1-Spot 23	55.6314	36137.7	2.68607	13.2508	1.79482	1.83942	2.47479	0.176775	1.70388	0.688494	1049.33	16.5	1059.65	16.2801	1080.99	36.0105	1080.99	36.0105	97.0711
OK-GBR-1 Run1-Spot 83	145.736	196911	1.06703	13.2478	1.36017	1.79262	1.95566	0.172238	1.40518	0.718521	1024.43	13.3096	1042.78	12.7474	1081.43	27.2681	1081.43	27.2681	94.7297
OK-GBR-1 Run1-Spot 56	47.4206	22589.5	1.50264	13.2125	2.39137	1.85992	2.73806	0.178229	1.33355	0.48704	1057.29	13.0039	1066.96	18.0825	1086.77	47.9399	1086.77	47.9399	97.2878
OK-GBR-1 Run1-Spot 75	272.566	111411	2.49873	13.1597	1.22252	1.72236	2.19221	0.164387	1.81967	0.830065	981.113	16.5609	1016.9	14.0837	1094.81	24.4767	1094.81	24.4767	89.6149
OK-GBR-1 Run1-Spot 49	729.473	382575	6.9704	13.1319	1.13738	1.91009	1.8596	0.18192	1.47122	0.791146	1077.46	14.5978	1084.62	12.3942	1099.03	22.746	1099.03	22.746	98.0374
OK-GBR-1 Run1-Spot 87	623.603	105745	102.412	13.1142	0.880239	1.81499	2.06466	0.17263	1.86762	0.904565	1026.58	17.724	1050.88	13.5177	1101.74	17.6052	1101.74	17.6052	93.178
OK-GBR-1 Run1-Spot 17	151.906	66412.1	2.80198	13.113	1.38989	2.04172	1.75571	0.194177	1.07272	0.610987	1143.96	11.2443	1129.54	11.9669	1101.93	27.7923	1101.93	27.7923	103.814
OK-GBR-1 Run1-Spot 61	179.633	53642.6	6.8857	13.0454	1.47474	1.9027	1.90644	0.180022	1.20817	0.63373	1067.1	11.8818	1082.03	12.6895	1112.22	29.4689	1112.22	29.4689	95.9429
OK-GBR-1 Run1-Spot 6	402.027	57275.4	3.35138	13.0261	0.656906	2.06767	1.07634	0.195341	0.852637	0.79216	1150.24	8.98222	1138.16	7.3665	1115.18	13.1113	1115.18	13.1113	103.144
OK-GBR-1 Run1-Spot 108	142.266	60109.2	3.95459	12.9369	1.02193	2.0281	1.39093	0.19029	0.943582	0.678381	1122.95	9.72438	1124.98	9.45949	1128.88	20.3574	1128.88	20.3574	99.4744
OK-GBR-1 Run1-Spot 20	45.8482	35332.7	2.47406	12.9259	1.52763	1.98846	2.35611	0.186412	1.79377	0.761327	1101.91	18.1687	1111.6	15.9195	1130.6	30.4221	1130.6	30.4221	97.4622
OK-GBR-1 Run1-Spot 94	128.792	229368	3.20727	12.8704	1.22488	2.10926	1.70305	0.196888	1.18323	0.694771	1158.58	12.5474	1151.83	11.7314	1139.14	24.3631	1139.14	24.3631	101.707
OK-GBR-1 Run1-Spot 25	76.821	165828	4.31965	12.8438	1.48568	2.11038	2.18006	0.196586	1.59544	0.731834	1156.95	16.8969	1152.2	15.0203	1143.27	29.552	1143.27	29.552	101.196
OK-GBR-1 Run1-Spot 101	81.8649	75018.6	4.44054	12.8228	1.40583	2.03081	1.73583	0.188864	1.01822	0.586587	1115.22	10.4274	1125.89	11.8105	1146.54	27.9325	1146.54	27.9325	97.2678
OK-GBR-1 Run1-Spot 13	175.181	140487	2.41784	12.8126	1.34039	2.16304	2.05323	0.201002	1.55535	0.757514	1180.7	16.7805	1169.25	14.2579	1148.1	26.6254	1148.1	26.6254	102.839
OK-GBR-1 Run1-Spot 34	85.0071	40981.3	2.75648	12.7629	1.42693	2.12555	1.97533	0.196753	1.36595	0.691504	1157.85	14.4767	1157.14	13.6408	1155.79	28.3315	1155.79	28.3315	100.179
OK-GBR-1 Run1-Spot 88	163.52	231082	4.88899	12.6665	1.51927	2.12221	2.24659	0.194959	1.65498	0.736665	1148.18	17.4061	1156.06	15.5065	1170.87	30.0872	1170.87	30.0872	98.0625
OK-GBR-1 Run1-Spot 71	217.99	59014.6	3.07677	12.6384	1.17163	2.17032	2.00835	0.198937	1.63118	0.812198	1169.61	17.4478	1171.58	13.961	1175.25	23.1834	1175.25	23.1834	99.5196
OK-GBR-1 Run1-Spot 50	151.768	213256	3.62839	12.5975	1.08272	2.12288	1.56963	0.193959	1.13642	0.724006	1142.78	11.9008	1156.27	10.8346	1181.66	21.4022	1181.66	21.4022	96.7097
OK-GBR-1 Run1-Spot 26	165.071	121523	3.72403	12.593	1.1714	2.26783	1.80144	0.207128	1.36858	0.759714	1213.5	15.1382	1202.34	12.6947	1182.37	23.1532	1182.37	23.1532	102.633
OK-GBR-1 Run1-Spot 60	87.7851	76358.3	5.43903	12.5137	1.9027	2.07726	2.32515	0.188528	1.33645	0.574778	1113.4	13.6659	1141.33	15.9384	1194.84	37.5584	1194.84	37.5584	93.1838
OK-GBR-1 Run1-Spot 65	70.3868	162829	3.35835	12.4979	1.58519	2.15721	2.11136	0.195536	1.39464	0.660539	1151.29	14.7043	1167.37	14.6491	1197.34	31.2641	1197.34	31.2641	96.154
OK-GBR-1 Run1-Spot 45	74.2574	90118.1	4.42974	12.4287	1.4088	2.17042	2.57474	0.195645	2.15513	0.837027	1151.88	22.7332	1171.61	17.8993	1208.28	27.7415	1208.28	27.7415	95.3324
OK-GBR-1 Run1-Spot 72	270.124	147039	4.01892	12.2503	1.0223	2.36828	1.5933	0.210415	1.22209	0.767019	1231.03	13.6951	1233.08	11.3755	1236.69	20.0574	1236.69	20.0574	99.542
OK-GBR-1 Run1-Spot 106	21.4909	35911	1.67241	12.0546	1.69369	2.04016	2.27646	0.178367	1.52109	0.66818	1058.05	14.8425	1129.01	15.5129	1268.2	33.0475	1268.2	33.0475	83.429
OK-GBR-1 Run1-Spot 5	38.7911	42385.3	2.11559	12.0394	1.77828	2.40506	2.11648	0.210005	1.1477	0.542267	1228.85	12.8407	1244.11	15.1802	1270.62	34.6873	1270.62	34.6873	96.7123
OK-GBR-1 Run1-Spot 70	141.364	106742	6.10694	11.9447	1.33999	2.54716	3.60255	0.220664	3.34407	0.92825	1285.38	38.9703	1285.62	26.2732	1286.01	26.0802	1286.01	26.0802	99.951
OK-GBR-1 Run1-Spot 22	136.591	247169	2.6069	11.8267	1.24459	2.64817	2.07648	0.227149	1.66216	0.800468	1319.54	19.8337	1314.14	15.306	1305.32	24.1709	1305.32	24.1709	101.089
OK-GBR-1 Run1-Spot 104	179.392	184680	2.78185	11.5925	1.25378	2.82578	1.89384	0.237582	1.41939	0.749477	1374.11	17.5655	1362.4	14.2043	1344.06	24.2166	1344.06	24.2166	102.236
OK-GBR-1 Run1-Spot 105	222.436	253751	2.35378	11.5483	1.32767	2.79313	2.16739	0.233942	1.71315	0.790418	1355.13	20.9377	1353.7	16.2068	1351.43	25.6182	1351.43	25.6182	100.273
OK-GBR-1 Run1-Spot 10	133.294	156303	3.31816	11.4915	1.15426	2.88615	1.79279	0.240544	1.37178	0.765166	1389.52	17.1469	1378.3	13.5203	1360.94	22.2423	1360.94	22.2423	102.1
OK-GBR-1 Run1-Spot 66	183.432	132086	3.9276	11.4838	1.26895	2.94223	1.87721	0.245053	1.38335	0.736921	1412.92	17.552	1392.85	14.2267	1362.23	24.4479	1362.23	24.4479	103.721
OK-GBR-1 Run1-Spot 107	139.99	39711.3	1.44694	11.4134	1.14969	2.81284	1.75758	0.232841	1.3294	0.75638	1349.37	16.1855	1358.96	13.1664	1374.07	22.1133	1374.07	22.1133	98.2022
OK-GBR-1 Run1-Spot 18	162.519	156254	2.96236	11.283	1.23412	2.97068	1.84309	0.243096	1.36892	0.742731	1402.77	17.2572	1400.15	14.0022	1396.14	23.6644	1396.14	23.6644	100.475
OK-GBR-1 Run1-Spot 15	75.6002	130774	3.52097	11.2414	1.2699	2.9341	2.05919	0.239217	1.621	0.787201	1382.62	20.1719	1390.75	15.5952	1403.22	24.3271	1403.22	24.3271	98.5321
OK-GBR-1 Run1-Spot 63	307.953	122315	5.15071	10.9358	0.870718	3.14085	1.63581	0.249114	1.38482	0.846566	1433.9	17.8037	1442.76	12.5992	1455.82	16.5614	1455.82	16.5614	98.4949
OK-GBR-1 Run1-Spot 39	135.108	221779	2.77435	10.8062	1.32527	3.20777	1.88551	0.251404	1.3412	0.71132	1445.71	17.3696	1459.04	14.5962	1478.47	25.1311	1478.47	25.1311	97.7845
OK-GBR-1 Run1-Spot 28	455.783	69239.5	2.7864	10.6946	0.664686	3.35277	1.229	0.260055	1.03375	0.841129	1490.13	13.7534	1493.44	9.61244	1498.13	12.571	1498.13	12.571	99.4657
OK-GBR-1 Run1-Spot 24	83.9234	92535.3	3.39908	10.5141	1.72311	3.55939	2.82534	0.271422	2.23906	0.792494	1548.02	30.8137	1540.53	22.3996	1530.25	32.4505	1530.25	32.4505	101.161
OK-GBR-1 Run1-Spot 38	179.959	144125	1.84432	10.1955	0.985859	3.96488	1.4334	0.293182	1.04053	0.725922	1657.41	15.2073	1627.04	11.6235	1587.97	18.4244	1587.97	18.4244	104.373
OK-GBR-1 Run1-Spot 77	259.045	34048.4	2.77129	10.0242	4.16543	3.61653	4.3955	0.262931	1.40342	0.319286	1504.82	18.8352	1553.17	34.9773	1619.56	77.5618	1619.56	77.5618	92.9154
OK-GBR-1 Run1-Spot 32	51.3607	95789.2	2.43721	9.95057	1.20843	4.00422	1.91781	0.288978	1.4892	0.776509	1636.42	21.5224	1635.05	15.583	1633.28	22.4523	1633.28	22.4523	100.192
OK-GBR-1 Run1-Spot 80	121.025	130385	3.6127	9.9458	0.862239	4.03468	2.03427	0.291037	1.8425	0.90573	1646.71	26.7755	1641.21	16.5545	1634.17	16.0177	1634.17	16.0177	100.767
OK-GBR-1 Run1-Spot 102	128.226	192581	3.61404	9.89509	1.42297	4.02501	1.92846	0.288859	1.30158	0.674932	1635.82	18.8049	1639.26	15.6857	1643.66	26.4023	1643.66	26.4023	99.5234
OK-GBR-1 Run1-Spot 59	55.3744	40401.8	1.25387	9.85199	1.62432	3.93591	2.28775	0.281234	1.61102	0.704194	1597.57	22.7961	1621.1	18.5253	1651.76	30.1096	1651.76	30.1096	96.7198
OK-GBR-1 Run1-Spot 54	78.5655	111869	1.75089	9.8413	1.58477	3.96908	2.19161	0.283296	1.51381	0.690733	1607.94	21.543	1627.9	17.7767	1653.77	29.3687	1653.77	29.3687	97.229
OK-GBR-1 Run1-Spot 92	47.1864	45715.5	0.851522	9.73593	1.47289	4.02921	2.39697	0.284509	1.89105	0.788934	1614.03	27.0012	1640.11	19.5014	1673.69	27.2256	1673.69	27.2256	96.4357
OK-GBR-1 Run1-Spot 44	148.725	201790	2.50526	9.68184	0.935182	4.36581	1.76697	0.306564	1.4992	0.848461	1723.78	22.6762	1705.89	14.5988	1683.98	17.2643	1683.98	17.2643	102.363
OK-GBR-1 Run1-Spot 79	33.162	49996	0.873614	9.63551	1.56455	4.02964	2.57415	0.281604	2.04412	0.794096	1599.44	28.9543	1640.2	20.9437	1692.83	28.8501	1692.83	28.8501	94.4831
OK-GBR-1 Run1-Spot 9	138.798	281495	1.70307	9.60058	1.04123	4.3733	1.65599	0.304512	1.28768	0.777593	1713.65	19.377	1707.31	13.6862	1699.52	19.1827	1699.52	19.1827	100.831
OK-GBR-1 Run1-Spot 46	134.661	234710	5.86425	9.57695	0.85355	4.3878	1.4086	0.30477	1.12054	0.795498	1714.92	16.8727	1710.04	11.6486	1704.06	15.7155	1704.06	15.7155	100.637
OK-GBR-1 Run1-Spot 110	236.893	150227	2.64673	9.50102	1.11589	4.5603	1.44135	0.314241	0.912291	0.632942	1761.54	14.0618	1742.04	12.0037	1718.7	20.5087	1718.7	20.5087	102.493
OK-GBR-1 Run1-Spot 1	88.3767	68541.2	1.63292	9.3757	0.791904	4.53791	1.53389	0.308573	1.31366	0.856424	1733.68	19.9692	1737.95	12.7631	1743.07	14.5091	1743.07	14.5091	99.4616
OK-GBR-1 Run1-Spot 91	735.112	81996.4	3.47108	9.15312	0.790478	4.63656	1.67238	0.307796	1.47377	0.881241	1729.85	22.36	1755.87	13.9693	1786.97	14.4043	1786.97	14.4043	96.8039
OK-GBR-1 Run1-Spot 4	311.609	217930	2.75838	9.13166	1.05451	4.78953	2.3457	0.317206	2.09531	0.893255	1776.07	32.5281	1783.07	19.7064	1791.24	19.2063	1791.24	19.2063	99.1529
OK-GBR-1 Run1-Spot 43	199.52	111553	2.44398	8.79728	0.894675	5.37618	1.37472	0.343021	1.04375	0.759245	1901.19	17.1851	1881.07	11.77	1858.91	16.1607	1858.91	16.1607	102.274
OK-GBR-1 Run1-Spot 62	52.5395	73142.2	2.20901	8.71005	1.23176	5.28365	1.75721	0.333775	1.25321	0.713185	1856.65	20.217	1866.22	15.004	1876.89	22.2026	1876.89	22.2026	98.9219
OK-GBR-1 Run1-Spot 103	53.7951	59346.8	1.51284	8.68169	1.20796	5.08932	1.80598	0.320452	1.34253	0.743383	1791.94	21.0032	1834.33	15.3273	1882.76	21.7581	1882.76	21.7581	95.1758
OK-GBR-1 Run1-Spot 12	141.333	72125.3	3.17707	8.66291	0.782549	5.34859	1.46449	0.336048	1.23788	0.845264	1867.63	20.0714	1876.66	12.5285	1886.66	14.0879	1886.66	14.0879	98.9912
OK-GBR-1 Run1-Spot 31	312.219	87377.8	2.11339	8.63748	0.976585	5.5233	1.54556	0.346006	1.19793	0.775079	1915.5	19.8513	1904.23	13.2884	1891.95	17.5706	1891.95	17.5706	101.245
OK-GBR-1 Run1-Spot 64	30.607	65549.7	1.1749	5.3717	0.905582	12.9257	1.62995	0.503576	1.35523	0.831457	2629.15	29.26	2674.25	15.3629	2708.52	14.9427	2708.52	14.9427	97.0694
OK-GBR-1 Run1-Spot 37	100.975	57245.2	2.74481	5.32296	0.913224	13.3822	1.63513	0.516631	1.35635	0.829504	2684.88	29.7847	2707	15.4497	2723.55	15.0441	2723.55	15.0441	98.58
OK-GBR-1 Run1-Spot 27	201.318	121293	2.54039	5.1565	0.929616	13.8817	1.53702	0.519153	1.22402	0.796364	2695.59	26.9653	2741.67	14.5589	2775.77	15.2406	2775.77	15.2406	97.1112
